# Supplementary material for: Convergent relaxation of molecular constraint in mammalian herbivores highlights the roles of liver and kidney functions in carnivory
Source: bioRxiv preprint, doi:10.1101/2023.11.17.567625, version 2 (2024-08-17)
Supplement: Supplemental_Tables [file 567625_file04.xlsx]

## Sheet: Table_S1
Table S1. Species selection for comparative genomic analyses of mammalian diet. The carnivory score represents the proportion of the diet composed of animal-based food items for each species, as listed in EltonTraits (Wilman et al. 2014). This score was used as input in our RERconverge analyses and informed selection of foreground species in our tests for positive selection. Most species were inc…
Common Name	Scientific Name	Carnivory Score	RERconverge	Positive Selection
Asian elephant	Elephas_maximus	0	Present	Present + Herbivore foreground
Talazac's shrew tenrec	Microgale_talazaci	100	Present	Present + Carnivore foreground
Lesser hedgehog tenrec	Echinops_telfairi	60	Present	Present
Nine-banded armadillo	Dasypus_novemcinctus	100	Present	Present + Carnivore foreground
Southern tamandua	Tamandua_tetradactyla	100	Present	Present + Carnivore foreground
Hoffmann's two-toed sloth	Choloepus_hoffmanni	0	Present	Present + Herbivore foreground
Common shrew	Sorex_araneus	100	Present	Present + Carnivore foreground
Madagascan rousette	Rousettus_madagascariensis	0	Present	Present + Herbivore foreground
Madagascan flying fox	Pteropus_rufus	0	Present	Present + Herbivore foreground
Greater false vampire bat	Megaderma_lyra	100	Present	Present + Carnivore foreground
Common pipistrelle	Pipistrellus_pipistrellus	100	Present	Present + Carnivore foreground
Velvety free-tailed bat	Molossus_molossus	100	Present	Present + Carnivore foreground
Greater bulldog bat	Noctilio_leporinus	100	Present	Present + Carnivore foreground
Parnell's mustached bat	Pteronotus_parnellii	100	Present	Present + Carnivore foreground
California leaf-nosed bat	Macrotus_californicus	50	Present	Present
Common vampire bat	Desmodus_rotundus	100	Present	Absent
Hairy big-eared bat	Micronycteris_hirsuta	80	Present	Present
Honduran yellow-shouldered bat	Sturnira_hondurensis	0	Present	Present + Herbivore foreground
Stripe-headed round-eared bat	Tonatia_saurophila	90	Present	Present + Carnivore foreground
Pale spear-nosed bat	Phyllostomus_discolor	30	Present	Present
Tailed tailless bat	Anoura_caudifer	30	Present	Present
Indian rhinoceros	Rhinoceros_unicornis	0	Present	Present + Herbivore foreground
Pig	Sus_scrofa	20	Present	Present
Chacoan peccary	Catagonus_wagneri	0	Present	Present + Herbivore foreground
Cattle	Bos_taurus	0	Present	Present + Herbivore foreground
Hippopotamus	Hippopotamus_amphibius	0	Present	Present + Herbivore foreground
Common bottlenose dolphin	Tursiops_truncatus	100	Present	Present + Carnivore foreground
Bryde's whale	Balaenoptera_edeni	100	Present	Present + Carnivore foreground
Sunda pangolin	Manis_javanica	100	Present	Present + Carnivore foreground
Cat	Felis_catus	100	Present	Present + Carnivore foreground
Asian palm civet	Paradoxurus_hermaphroditus	60	Present	Present
Meerkat	Suricata_suricatta	90	Present	Present + Carnivore foreground
Fossa	Cryptoprocta_ferox	100	Present	Present + Carnivore foreground
Maned wolf	Chrysocyon_brachyurus	80	Absent	Present
Dog	Canis_lupus	100	Present	Present + Carnivore foreground
California sea lion	Zalophus_californianus	100	Present	Present + Carnivore foreground
Western spotted skunk	Spilogale_gracilis	70	Present	Present
European polecat	Mustela_putorius	100	Present	Present + Carnivore foreground
Eurasian otter	Lutra_lutra	100	Present	Present + Carnivore foreground
Kinkajou	Potos_flavus	20	Present	Present + Herbivore foreground
Raccoon	Procyon_lotor	60	Present	Present
Cacomistle	Bassariscus_sumichrasti	30	Present	Present
Red panda	Ailurus_fulgens	20	Present	Present + Herbivore foreground
Sun bear	Ursus_malayanus	70	Absent	Present
Polar bear	Ursus_maritimus	100	Present	Present + Carnivore foreground
American black bear	Ursus_americanus	20	Present	Present
Giant panda	Ailuropoda_melanoleuca	10	Present	Present + Herbivore foreground
Northern treeshrew	Tupaia_belangeri	90	Present	Present + Carnivore foreground
Sunda flying lemur	Galeopterus_variegatus	0	Present	Present + Herbivore foreground
Northern greater galago	Otolemur_garnettii	20	Present	Present
Sunda slow loris	Nycticebus_coucang	80	Present	Present
Mongoose lemur	Eulemur_mongoz	0	Present	Present + Herbivore foreground
Gray mouse lemur	Microcebus_murinus	40	Present	Present
Fat-tailed dwarf lemur	Cheirogaleus_medius	20	Present	Present + Herbivore foreground
Philippine tarsier	Carlito_syrichta	100	Present	Present + Carnivore foreground
Golden snub-nosed monkey	Rhinopithecus_roxellana	0	Present	Absent
Gelada	Theropithecus_gelada	0	Present	Present + Herbivore foreground
Olive baboon	Papio_anubis	50	Present	Present
Japanese macaque	Macaca_fuscata	10	Present	Present + Herbivore foreground
Crab-eating macaque	Macaca_fascicularis	50	Present	Present
Black-capped squirrel monkey	Saimiri_boliviensis	40	Present	Present
Mantled howler monkey	Alouatta_palliata	0	Present	Present + Herbivore foreground
Mountain hare	Lepus_timidus	0	Present	Present + Herbivore foreground
Cape ground squirrel	Xerus_inauris	30	Present	Present
Eurasian red squirrel	Sciurus_vulgaris	0	Present	Present + Herbivore foreground
Hazel dormouse	Muscardinus_avellanarius	10	Present	Present + Herbivore foreground
Woodland dormouse	Graphiurus_murinus	60	Present	Present
Canyon mouse	Peromyscus_crinitus	60	Present	Present
Southern grasshopper mouse	Onychomys_torridus	90	Present	Present + Carnivore foreground
Desert woodrat	Neotoma_lepida	10	Present	Present + Herbivore foreground
Hispid cotton rat	Sigmodon_hispidus	50	Present	Present
Prairie vole	Microtus_ochrogaster	0	Present	Present + Herbivore foreground
Gambian pouched rat	Cricetomys_gambianus	40	Present	Present
Brown rat	Rattus_norvegicus	30	Present	Present
Great gerbil	Rhombomys_opimus	0	Present	Present + Herbivore foreground
Golden spiny mouse	Acomys_russatus	60	Present	Present
Gray short-tailed possum	Monodelphis_domestica	60	Present	Absent
Ground cuscus	Phalanger_gymnotis	0	Present	Absent
Western gray kangaroo	Macropus_fuliginosus	0	Present	Absent
Leadbeater's possum	Gymnobelideus_leadbeateri	50	Present	Absent
Tasmanian devil	Sarcophilus_harrisii	100	Present	Absent
Yellow-footed antechinus	Antechinus_flavipes	100	Present	Absent

## Sheet: Table_S2
Table S2. GO Term overrepresentation in genes that were filtered from downstream analyses (n=2322)
GO Term	Description	Genes	P-value	Q-value
GO:0050911	detection of chemical stimulus involved in sensory perception of smell	OR10A7/OR10AD1/OR10D3/OR10G2/OR10J1/OR10J3/OR10J5/OR10P1/OR10S1/OR10T2/OR10V1/OR11H1/OR11H12/OR11H2/OR11H4/OR12D3/OR13A1/OR13D1/OR13F1/OR13G1/OR13H1/OR1B1/OR1F1/OR1I1/OR1J1/OR1J4/OR1K1/OR1L3/OR1N2/OR2A4/OR2AE1/OR2C1/OR2C3/OR2D2/OR2D3/OR2G2/OR2H2/OR2I1P/OR2S2/OR2T1/OR2T11/OR2W1/OR2W3/OR2Z1/OR4D1/OR4F17/OR4F5/OR4F6/OR4K5/OR4S1/OR4X1/OR51B2/OR51B4/OR51B5/OR51V1/OR52B6/OR52E2/OR52E8/OR52K1/OR52K2/OR5…	3.92906e-70	1.60149e-66
GO:0050907	detection of chemical stimulus involved in sensory perception	OR10A7/OR10AD1/OR10D3/OR10G2/OR10J1/OR10J3/OR10J5/OR10P1/OR10S1/OR10T2/OR10V1/OR11H1/OR11H12/OR11H2/OR11H4/OR12D3/OR13A1/OR13D1/OR13F1/OR13G1/OR13H1/OR1B1/OR1F1/OR1I1/OR1J1/OR1J4/OR1K1/OR1L3/OR1N2/OR2A4/OR2AE1/OR2C1/OR2C3/OR2D2/OR2D3/OR2G2/OR2H2/OR2I1P/OR2S2/OR2T1/OR2T11/OR2W1/OR2W3/OR2Z1/OR4D1/OR4F17/OR4F5/OR4F6/OR4K5/OR4S1/OR4X1/OR51B2/OR51B4/OR51B5/OR51V1/OR52B6/OR52E2/OR52E8/OR52K1/OR52K2/OR5…	4.86183e-68	9.90841e-65
GO:0009593	detection of chemical stimulus	C4B/OR10A7/OR10AD1/OR10D3/OR10G2/OR10J1/OR10J3/OR10J5/OR10P1/OR10S1/OR10T2/OR10V1/OR11H1/OR11H12/OR11H2/OR11H4/OR12D3/OR13A1/OR13D1/OR13F1/OR13G1/OR13H1/OR1B1/OR1F1/OR1I1/OR1J1/OR1J4/OR1K1/OR1L3/OR1N2/OR2A4/OR2AE1/OR2C1/OR2C3/OR2D2/OR2D3/OR2G2/OR2H2/OR2I1P/OR2S2/OR2T1/OR2T11/OR2W1/OR2W3/OR2Z1/OR4D1/OR4F17/OR4F5/OR4F6/OR4K5/OR4S1/OR4X1/OR51B2/OR51B4/OR51B5/OR51V1/OR52B6/OR52E2/OR52E8/OR52K1/OR52K2…	3.40577e-61	4.62731e-58
GO:0007608	sensory perception of smell	OR10A7/OR10AD1/OR10D3/OR10G2/OR10J1/OR10J3/OR10J5/OR10P1/OR10S1/OR10T2/OR10V1/OR11H1/OR11H12/OR11H2/OR11H4/OR12D3/OR13A1/OR13D1/OR13F1/OR13G1/OR13H1/OR1B1/OR1F1/OR1I1/OR1J1/OR1J4/OR1K1/OR1L3/OR1N2/OR2A4/OR2AE1/OR2C1/OR2C3/OR2D2/OR2D3/OR2G2/OR2H2/OR2I1P/OR2S2/OR2T1/OR2T11/OR2W1/OR2W3/OR2Z1/OR4D1/OR4F17/OR4F5/OR4F6/OR4K5/OR4S1/OR4X1/OR51B2/OR51B4/OR51B5/OR51V1/OR52B6/OR52E2/OR52E8/OR52K1/OR52K2/OR5…	6.44345e-61	6.56588e-58
GO:0007606	sensory perception of chemical stimulus	OR10A7/OR10AD1/OR10D3/OR10G2/OR10J1/OR10J3/OR10J5/OR10P1/OR10S1/OR10T2/OR10V1/OR11H1/OR11H12/OR11H2/OR11H4/OR12D3/OR13A1/OR13D1/OR13F1/OR13G1/OR13H1/OR1B1/OR1F1/OR1I1/OR1J1/OR1J4/OR1K1/OR1L3/OR1N2/OR2A4/OR2AE1/OR2C1/OR2C3/OR2D2/OR2D3/OR2G2/OR2H2/OR2I1P/OR2S2/OR2T1/OR2T11/OR2W1/OR2W3/OR2Z1/OR4D1/OR4F17/OR4F5/OR4F6/OR4K5/OR4S1/OR4X1/OR51B2/OR51B4/OR51B5/OR51V1/OR52B6/OR52E2/OR52E8/OR52K1/OR52K2/OR5…	8.84742e-57	7.21242e-54
GO:0050906	detection of stimulus involved in sensory perception	EYS/GUCY2F/OR10A7/OR10AD1/OR10D3/OR10G2/OR10J1/OR10J3/OR10J5/OR10P1/OR10S1/OR10T2/OR10V1/OR11H1/OR11H12/OR11H2/OR11H4/OR12D3/OR13A1/OR13D1/OR13F1/OR13G1/OR13H1/OR1B1/OR1F1/OR1I1/OR1J1/OR1J4/OR1K1/OR1L3/OR1N2/OR2A4/OR2AE1/OR2C1/OR2C3/OR2D2/OR2D3/OR2G2/OR2H2/OR2I1P/OR2S2/OR2T1/OR2T11/OR2W1/OR2W3/OR2Z1/OR4D1/OR4F17/OR4F5/OR4F6/OR4K5/OR4S1/OR4X1/OR51B2/OR51B4/OR51B5/OR51V1/OR52B6/OR52E2/OR52E8/OR52K1…	6.79555e-54	4.61644e-51
GO:0051606	detection of stimulus	AIPL1/C4B/CD1D/EYS/GRK7/GUCA1C/GUCY2F/HMGA2/NAIP/NLRC4/NPFFR2/OR10A7/OR10AD1/OR10D3/OR10G2/OR10J1/OR10J3/OR10J5/OR10P1/OR10S1/OR10T2/OR10V1/OR11H1/OR11H12/OR11H2/OR11H4/OR12D3/OR13A1/OR13D1/OR13F1/OR13G1/OR13H1/OR1B1/OR1F1/OR1I1/OR1J1/OR1J4/OR1K1/OR1L3/OR1N2/OR2A4/OR2AE1/OR2C1/OR2C3/OR2D2/OR2D3/OR2G2/OR2H2/OR2I1P/OR2S2/OR2T1/OR2T11/OR2W1/OR2W3/OR2Z1/OR4D1/OR4F17/OR4F5/OR4F6/OR4K5/OR4S1/OR4X1/OR51…	3.25003e-40	1.89245e-37
GO:0006334	nucleosome assembly	H1-10/H1-3/H1-5/H2BC11/H2BC15/H2BC18/H2BC4/H2BC6/H2BC9/H2BU1/H3-4/H3C1/H3C10/H3C11/H3C13/H3C2/H3C4/H3C8/H4-16/H4C1/H4C11/H4C13/H4C2/H4C3/H4C7/H4C8/NAP1L2	1.96389e-11	1.0006e-08
GO:0006335	DNA replication-dependent nucleosome assembly	H3C1/H3C10/H3C11/H3C2/H3C4/H3C8/H4-16/H4C1/H4C11/H4C13/H4C2/H4C3/H4C8	1.37473e-10	5.6034e-08
GO:0034723	DNA replication-dependent nucleosome organization	H3C1/H3C10/H3C11/H3C2/H3C4/H3C8/H4-16/H4C1/H4C11/H4C13/H4C2/H4C3/H4C8	1.37473e-10	5.6034e-08
GO:0000183	rDNA heterochromatin assembly	H3C1/H3C10/H3C11/H3C13/H3C2/H3C4/H3C8/H4-16/H4C1/H4C11/H4C13/H4C2/H4C3/H4C8	2.34902e-10	8.70419e-08
GO:0031497	chromatin assembly	CENPV/H1-10/H1-3/H1-5/H2BC11/H2BC15/H2BC18/H2BC4/H2BC6/H2BC9/H2BU1/H3-4/H3C1/H3C10/H3C11/H3C13/H3C2/H3C4/H3C8/H4-16/H4C1/H4C11/H4C13/H4C2/H4C3/H4C7/H4C8/HMGA2/NAP1L2	9.28237e-09	3.15291e-06
GO:0006323	DNA packaging	CENPV/CHMP1A/GPER1/H1-10/H1-3/H1-5/H2BC11/H2BC15/H2BC18/H2BC4/H2BC6/H2BC9/H2BU1/H3-4/H3C1/H3C10/H3C11/H3C13/H3C2/H3C4/H3C8/H4-16/H4C1/H4C11/H4C13/H4C2/H4C3/H4C7/H4C8/HMGA2/INCENP/NAP1L2/TENT4A	1.24089e-08	3.89066e-06
GO:0034728	nucleosome organization	H1-10/H1-3/H1-5/H2BC11/H2BC15/H2BC18/H2BC4/H2BC6/H2BC9/H2BU1/H3-4/H3C1/H3C10/H3C11/H3C13/H3C2/H3C4/H3C8/H4-16/H4C1/H4C11/H4C13/H4C2/H4C3/H4C7/H4C8/NAP1L2	1.67651e-08	4.88103e-06
GO:0006333	chromatin assembly or disassembly	CENPV/H1-10/H1-3/H1-5/H2BC11/H2BC15/H2BC18/H2BC4/H2BC6/H2BC9/H2BU1/H3-4/H3C1/H3C10/H3C11/H3C13/H3C2/H3C4/H3C8/H4-16/H4C1/H4C11/H4C13/H4C2/H4C3/H4C7/H4C8/HMGA2/MAP1S/NAP1L2	7.59096e-08	2.06272e-05
GO:0007156	homophilic cell adhesion via plasma membrane adhesion molecules	CDH26/CELSR1/PCDHA1/PCDHA10/PCDHA11/PCDHA12/PCDHA13/PCDHA2/PCDHA3/PCDHA4/PCDHA5/PCDHA9/PCDHGA10/PCDHGA12/PCDHGA2/PCDHGA6/PCDHGA7/PCDHGA8/PCDHGA9/PCDHGB1/PCDHGB2/PCDHGB3/PCDHGB4/PCDHGB6/PCDHGB7/PVR/TRO	1.42847e-07	3.63903e-05
GO:0031507	heterochromatin assembly	CENPV/H3C1/H3C10/H3C11/H3C13/H3C2/H3C4/H3C8/H4-16/H4C1/H4C11/H4C13/H4C2/H4C3/H4C8/HMGA2	1.96951e-07	4.72219e-05
GO:0097549	chromatin organization involved in negative regulation of transcription	CENPV/DYDC2/H1-10/H1-3/H1-5/H2AC13/H2AC4/H3C1/H3C10/H3C11/H3C13/H3C2/H3C4/H3C8/H4-16/H4C1/H4C11/H4C13/H4C2/H4C3/H4C8/HMGA2	4.58869e-07	0.000102097
GO:0065004	protein-DNA complex assembly	BDP1/CENPV/H1-10/H1-3/H1-5/H2BC11/H2BC15/H2BC18/H2BC4/H2BC6/H2BC9/H2BU1/H3-4/H3C1/H3C10/H3C11/H3C13/H3C2/H3C4/H3C8/H4-16/H4C1/H4C11/H4C13/H4C2/H4C3/H4C7/H4C8/NAP1L2/SOX12/UBB	4.75918e-07	0.000102097
GO:0045814	negative regulation of gene expression, epigenetic	DYDC2/H1-10/H1-3/H1-5/H2AC13/H2AC4/H3C1/H3C10/H3C11/H3C13/H3C2/H3C4/H3C8/H4-16/H4C1/H4C11/H4C13/H4C2/H4C3/H4C8	8.17444e-07	0.000166595
GO:0034401	chromatin organization involved in regulation of transcription	ARID1B/CENPV/DYDC2/H1-10/H1-3/H1-5/H2AC13/H2AC4/H3C1/H3C10/H3C11/H3C13/H3C2/H3C4/H3C8/H4-16/H4C1/H4C11/H4C13/H4C2/H4C3/H4C8/HMGA2	9.77517e-07	0.000189731
GO:0070828	heterochromatin organization	CENPV/H3C1/H3C10/H3C11/H3C13/H3C2/H3C4/H3C8/H4-16/H4C1/H4C11/H4C13/H4C2/H4C3/H4C8/HMGA2	1.43653e-06	0.000266149
GO:0045653	negative regulation of megakaryocyte differentiation	H4-16/H4C1/H4C11/H4C13/H4C2/H4C3/H4C8	4.6133e-06	0.000817558
GO:0071824	protein-DNA complex subunit organization	BDP1/CENPV/H1-10/H1-3/H1-5/H2BC11/H2BC15/H2BC18/H2BC4/H2BC6/H2BC9/H2BU1/H3-4/H3C1/H3C10/H3C11/H3C13/H3C2/H3C4/H3C8/H4-16/H4C1/H4C11/H4C13/H4C2/H4C3/H4C7/H4C8/NAP1L2/SOX12/UBB	1.46161e-05	0.00248229
GO:0038111	interleukin-7-mediated signaling pathway	H3C1/H3C10/H3C11/H3C13/H3C2/H3C4/H3C8/TSLP	3.39054e-05	0.00552793
GO:0006067	ethanol metabolic process	ADH4/ADH6/ADH7/ALDH3B2/SULT1A1/SULT1B1/SULT1C4	6.47681e-05	0.0101536
GO:0045652	regulation of megakaryocyte differentiation	H3C1/H3C10/H3C11/H3C13/H3C2/H3C4/H3C8/H4-16/H4C1/H4C11/H4C13/H4C2/H4C3/H4C8	6.81921e-05	0.0102626
GO:0016045	detection of bacterium	CD1D/NAIP/NLRC4/PGLYRP4/TLR1/TLR6	7.04985e-05	0.0102626
GO:0042742	defense response to bacterium	AZU1/CD160/CRP/DEFB113/DEFB127/DEFB132/FPR2/GNLY/GSDMC/H2BC11/H2BC4/H2BC6/HAVCR2/MR1/NAIP/NLRC4/NLRP1/PGLYRP4/PLAC8/PRG2/RNASE8/TLR6/WFDC3/WFDC5	8.10697e-05	0.0113945
GO:0071103	DNA conformation change	CENPV/CHMP1A/GPER1/H1-10/H1-3/H1-5/H2BC11/H2BC15/H2BC18/H2BC4/H2BC6/H2BC9/H2BU1/H3-4/H3C1/H3C10/H3C11/H3C13/H3C2/H3C4/H3C8/H4-16/H4C1/H4C11/H4C13/H4C2/H4C3/H4C7/H4C8/HMGA2/IGHMBP2/INCENP/NAP1L2/TENT4A/UBB	0.0001002	0.0136138
GO:0060968	regulation of gene silencing	H1-10/H1-3/H1-5/H3C1/H3C10/H3C11/H3C13/H3C2/H3C4/H3C8/H4-16/H4C1/H4C11/H4C13/H4C2/H4C3/H4C8/POLR2H/WTIP	0.000105046	0.0138119
GO:0040029	regulation of gene expression, epigenetic	ARID1B/DIRAS3/DYDC2/H1-10/H1-3/H1-5/H2AC13/H2AC4/H3C1/H3C10/H3C11/H3C13/H3C2/H3C4/H3C8/H4-16/H4C1/H4C11/H4C13/H4C2/H4C3/H4C8/KLF2/POLR2H	0.000108551	0.0138267
GO:0098581	detection of external biotic stimulus	C4B/CD1D/NAIP/NLRC4/PGLYRP4/TLR1/TLR6	0.000141199	0.0174402
GO:0098543	detection of other organism	CD1D/NAIP/NLRC4/PGLYRP4/TLR1/TLR6	0.000184397	0.0216994
GO:0070269	pyroptosis	GSDMC/NAIP/NLRC4/NLRP9/ZBP1	0.000186329	0.0216994
GO:0098742	cell-cell adhesion via plasma-membrane adhesion molecules	CD177/CDH26/CELSR1/CLDN22/MILR1/PCDHA1/PCDHA10/PCDHA11/PCDHA12/PCDHA13/PCDHA2/PCDHA3/PCDHA4/PCDHA5/PCDHA9/PCDHGA10/PCDHGA12/PCDHGA2/PCDHGA6/PCDHGA7/PCDHGA8/PCDHGA9/PCDHGB1/PCDHGB2/PCDHGB3/PCDHGB4/PCDHGB6/PCDHGB7/PVR/TRO	0.000257378	0.0291409
GO:0001906	cell killing	AZU1/CD160/CD1D/CD59/CD5L/CFHR5/CLEC2A/DEFB132/FCER2/GNLY/GZMM/H2BC11/HAVCR2/IL12RB1/MR1/PGLYRP4/PVR	0.000275275	0.0303249
GO:0060964	regulation of gene silencing by miRNA	H3C1/H3C10/H3C11/H3C13/H3C2/H3C4/H3C8/H4-16/H4C1/H4C11/H4C13/H4C2/H4C3/H4C8/POLR2H/WTIP	0.000331969	0.035608
GO:0060147	regulation of posttranscriptional gene silencing	H3C1/H3C10/H3C11/H3C13/H3C2/H3C4/H3C8/H4-16/H4C1/H4C11/H4C13/H4C2/H4C3/H4C8/POLR2H/WTIP	0.000374094	0.0381202
GO:0060966	regulation of gene silencing by RNA	H3C1/H3C10/H3C11/H3C13/H3C2/H3C4/H3C8/H4-16/H4C1/H4C11/H4C13/H4C2/H4C3/H4C8/POLR2H/WTIP	0.000374094	0.0381202

## Sheet: Table_S3
Table S3. Gene-phenotype evolutionary rate correlation. Correlation statistics between gene evolutionary rates and carnivory score as obtained from RERconverge. Multiple hypothesis testing corrections were performed by generating Q-values using Storey’s correction method. Permulation P-values were generated from 100,000 null statistics. A negative correlation (Rho) signifies the following pattern…
Gene	Rho	Parametric P-value	Parametric Q-value	Permulation P-value	Permulation Q-value
SLC14A2	-0.445689	1.54e-08	0.000214398	0	0
SLC13A2	-0.357815	6.94e-06	0.0367942	0	0
CLDN16	-0.399896	7.93e-06	0.0367942	1e-05	0.03455
CPB1	-0.324809	8.02e-05	0.150169	1e-05	0.03455
PNLIP	-0.34975	1.85e-05	0.0645023	2e-05	0.0460666
ACADSB	-0.306305	0.00033615	0.259807	2e-05	0.0460666
PNLIPRP2	-0.311203	0.000106074	0.150169	3e-05	0.0592285
NAGS	-0.293813	0.00049265	0.320223	6e-05	0.10365
SLC1A1	-0.338819	6.63e-05	0.150169	9e-05	0.131619
GNMT	-0.385869	3.14e-05	0.0873108	0.00011	0.131619
TAAR1	-0.323694	0.000260083	0.24678	0.00012	0.131619
MRPS23	-0.29359	0.000634024	0.356868	0.00012	0.131619
SLC26A3	-0.275714	0.000665563	0.356868	0.00015	0.131619
PRSS3	-0.267077	0.00260471	0.540847	0.00016	0.131619
SLC34A3	-0.274093	0.00181912	0.495953	0.00018	0.131619
PLGRKT	-0.34734	0.000187706	0.237397	0.00019	0.131619
SLC51A	-0.262079	0.00190159	0.495953	0.00019	0.131619
GLS2	-0.33682	0.000107942	0.150169	0.0002	0.131619
SYCN	-0.333444	0.000239029	0.24678	0.0002	0.131619
BPIFB1	-0.24579	0.00260269	0.540847	0.0002	0.131619
ACY1	-0.251266	0.00365912	0.600984	0.0002	0.131619
ACOT13	-0.296642	0.000821526	0.394106	0.00023	0.144482
ACAA2	-0.307139	0.000306513	0.259807	0.00033	0.171559
TRIM7	0.271867	0.00461511	0.662794	0.00033	0.171559
PRADC1	-0.444205	0.000236039	0.24678	0.00035	0.171559
RBP2	-0.320901	0.000529409	0.320223	0.00035	0.171559
PTTG1IP	0.28503	0.00184038	0.495953	0.00036	0.171559
TBC1D20	0.271056	0.00205363	0.50782	0.00036	0.171559
ZCWPW1	-0.233651	0.00679492	0.705461	0.00036	0.171559
CELA1	-0.339378	8.89e-05	0.150169	0.00038	0.175053
NAA11	0.341135	0.000323433	0.259807	0.00044	0.181842
PDXK	-0.326983	0.00046043	0.320223	0.00046	0.181842
CYP1A1	-0.271632	0.00192506	0.495953	0.00047	0.181842
BHMT	-0.331093	0.00026608	0.24678	0.00048	0.181842
SLC6A19	-0.288358	0.000919965	0.412857	0.00048	0.181842
ACMSD	-0.270228	0.00240265	0.522276	0.00048	0.181842
LGALS3BP	-0.248765	0.00760988	0.725732	0.00049	0.181842
AGXT	-0.257836	0.00342708	0.600984	0.0005	0.181842
IYD	-0.292323	0.000775014	0.385071	0.00055	0.194897
MYH11	-0.272591	0.00170312	0.495953	0.00058	0.20039
HBEGF	-0.268888	0.00337403	0.600984	0.0006	0.202244
SLC23A1	-0.255008	0.00236046	0.521249	0.00072	0.234339
SI	-0.250737	0.00219014	0.50782	0.00073	0.234339
SLC43A1	-0.227342	0.00613811	0.704596	0.00076	0.234339
ICAM2	-0.253412	0.00337004	0.600984	0.00077	0.234339
CLCNKB	-0.28335	0.00124638	0.481657	0.00078	0.234339
CTRC	-0.256778	0.00370274	0.600984	0.00081	0.238174
HSD17B2	-0.205991	0.014618	0.868314	0.00085	0.244729
GOT2	-0.29743	0.00101979	0.443355	0.00094	0.257431
PTCHD4	-0.336357	0.000372081	0.272442	0.00095	0.257431
CD38	-0.233544	0.00962767	0.787855	0.00095	0.257431
SLC7A9	-0.235612	0.00870519	0.742535	0.001	0.265769
TAS2R1	-0.219008	0.0110097	0.80157	0.00102	0.26597
TFF2	-0.293448	0.00160792	0.495953	0.00108	0.273887
TRPA1	-0.22491	0.00733303	0.71843	0.00109	0.273887
TRPM6	-0.256587	0.00147168	0.495953	0.00118	0.291207
SLC5A12	-0.238784	0.00370149	0.600984	0.00121	0.293372
BSND	-0.203701	0.0196147	0.89863	0.00132	0.314524
AOC1	-0.223186	0.00875329	0.742535	0.00138	0.316522
PPEF2	0.227802	0.00787832	0.736604	0.00141	0.316522
HS3ST6	-0.328328	0.000667286	0.356868	0.00142	0.316522
ALDH1B1	-0.3274	0.000692599	0.356868	0.00142	0.316522
TAS2R7	-0.245	0.00724267	0.71461	0.00151	0.331241
ACOX2	-0.234557	0.00411183	0.62178	0.00165	0.356297
ANO6	-0.236802	0.00550884	0.702006	0.00168	0.356845
SLC12A1	-0.269701	0.00117117	0.467139	0.00171	0.356845
MEP1B	-0.257524	0.00205012	0.50782	0.00173	0.356845
ACO1	-0.261813	0.00192269	0.495953	0.00176	0.357694
RIC8B	0.3236	0.00108591	0.457792	0.00182	0.358936
PRMT6	0.293137	0.0021823	0.50782	0.00182	0.358936
TMEM86B	-0.200068	0.0214452	0.89863	0.00185	0.358936
TMEM139	-0.204678	0.016431	0.885041	0.00187	0.358936
MGP	-0.28997	0.0013799	0.492234	0.002	0.37863
CKMT1B	0.328733	0.000893265	0.412857	0.00205	0.382851
SLC46A3	-0.219016	0.0110065	0.80157	0.00209	0.385117
CTDSPL	0.33107	0.00173515	0.495953	0.00212	0.385505
PHLDB1	0.240033	0.00472522	0.662794	0.00217	0.389473
CA3	-0.276075	0.00282195	0.560843	0.00221	0.391566
FCSK	-0.20369	0.0130255	0.840016	0.00227	0.397106
TAS1R1	-0.280051	0.00222726	0.507962	0.00233	0.402507
CMTR2	-0.216905	0.0139215	0.864622	0.00241	0.406374
TAFA3	0.261881	0.00357033	0.600984	0.00242	0.406374
TUT4	-0.228206	0.00612037	0.704596	0.00246	0.406374
PLA2G1B	-0.210255	0.0195861	0.89863	0.00247	0.406374
TIMM23B	-0.353655	0.00357996	0.600984	0.00255	0.409779
CLCNKA	-0.236725	0.00608103	0.704596	0.00255	0.409779
CLPS	-0.273691	0.00270973	0.546345	0.00263	0.413218
FTH1	-0.342613	0.00186501	0.495953	0.00266	0.413218
ARHGAP42	0.297639	0.00117523	0.467139	0.00272	0.413218
ZC2HC1B	0.246148	0.00444058	0.650288	0.00274	0.413218
KRT75	-0.262882	0.00305787	0.590848	0.00276	0.413218
SULT1E1	-0.229153	0.0111201	0.80157	0.00277	0.413218
PGA3	-0.318254	0.000527883	0.320223	0.00281	0.413218
GHITM	0.212218	0.0175032	0.89863	0.00288	0.413218
CELA3B	-0.307316	0.00128256	0.482241	0.00289	0.413218
PGM2	-0.211731	0.010571	0.80157	0.0029	0.413218
TRPS1	0.252035	0.00318893	0.59952	0.00295	0.413218
REC8	-0.224702	0.00570204	0.702006	0.00297	0.413218
NEIL1	0.243422	0.00429497	0.642491	0.00298	0.413218
FAM83E	0.190937	0.0391945	0.999464	0.00299	0.413218
KRT26	-0.230949	0.0084574	0.742535	0.00306	0.4146
B3GALT5	-0.246688	0.00517568	0.686459	0.00311	0.4146
PJA2	-0.244123	0.00462918	0.662794	0.00312	0.4146
FUS	-0.279937	0.00267365	0.546345	0.00315	0.4146
NR1I2	-0.211017	0.0117094	0.8044	0.00315	0.4146
CUTC	0.255779	0.00518101	0.686459	0.00319	0.415904
FAM219B	0.257635	0.00401641	0.616205	0.00328	0.417113
GLCCI1	0.29712	0.00146609	0.495953	0.0033	0.417113
ADRB1	-0.242507	0.00998809	0.800202	0.00331	0.417113
SLC36A1	-0.23893	0.00579661	0.704596	0.00332	0.417113
CA6	-0.225789	0.00951189	0.787855	0.00339	0.422003
CBSL	-0.242735	0.00638147	0.704596	0.00342	0.422003
MYL6B	-0.280788	0.00371511	0.600984	0.00352	0.430359
SLC5A2	-0.212608	0.0136507	0.855446	0.00355	0.430359
LOX	-0.253676	0.00481183	0.662794	0.00365	0.434853
AQP8	-0.256925	0.00497705	0.67883	0.00365	0.434853
UCP3	-0.214497	0.0181502	0.89863	0.00371	0.438224
TMC4	-0.228191	0.00649867	0.70493	0.00382	0.442919
SAP130	0.278413	0.00190184	0.495953	0.00391	0.442919
SLC10A2	-0.23609	0.00530794	0.693759	0.00391	0.442919
MIF	-0.325062	0.00567572	0.702006	0.00391	0.442919
ZEB2	0.23695	0.00603152	0.704596	0.00391	0.442919
TMIGD1	-0.196589	0.0181959	0.89863	0.00411	0.453046
PEA15	0.298498	0.00679498	0.705461	0.00415	0.453046
KCNK17	-0.202689	0.0228347	0.923479	0.00415	0.453046
TAT	-0.245555	0.00503328	0.679835	0.0042	0.453046
KCND2	0.37494	0.00192326	0.495953	0.00421	0.453046
ATPAF1	-0.234423	0.009351	0.783682	0.00424	0.453046
SMIM34A	-0.210942	0.0177416	0.89863	0.00426	0.453046
FABP1	-0.292811	0.00190743	0.495953	0.00429	0.453046
ATG4B	-0.272024	0.00214879	0.50782	0.0043	0.453046
SMIM34B	-0.21011	0.0182064	0.89863	0.00435	0.453046
CLCA1	-0.176758	0.0310492	0.980579	0.00436	0.453046
ABCB4	-0.20656	0.0117746	0.8044	0.00444	0.457422
FKBP9	0.279715	0.00352406	0.600984	0.00449	0.457422
ATP2C1	0.286027	0.00169041	0.495953	0.00457	0.457422
HK1	-0.207592	0.015694	0.87881	0.00464	0.457422
SLC16A5	-0.221316	0.00812382	0.742535	0.00465	0.457422
PLEKHF1	0.253964	0.00861578	0.742535	0.00465	0.457422
CLN3	-0.194379	0.0200042	0.89863	0.00465	0.457422
DUPD1	0.191042	0.0382393	0.999464	0.00467	0.457422
GPRC5A	-0.177386	0.034053	0.998393	0.0047	0.457422
PNPLA7	-0.202559	0.0189146	0.89863	0.00475	0.457902
ACSL5	-0.194627	0.0173831	0.89863	0.00491	0.457902
MAP3K14	0.230844	0.00606857	0.704596	0.00493	0.457902
HSF4	0.23022	0.00722651	0.71461	0.00493	0.457902
INAFM2	-0.270779	0.0107208	0.80157	0.00493	0.457902
UBAP1	0.237466	0.00652026	0.70493	0.00495	0.457902
MOGAT2	-0.228953	0.00933521	0.783682	0.00496	0.457902
ATP1A1	-0.261664	0.00553553	0.702006	0.00497	0.457902
TMEM81	0.226722	0.00868337	0.742535	0.00527	0.482327
LYG1	-0.216479	0.0180447	0.89863	0.00536	0.485427
COL4A3	-0.174867	0.0290087	0.977876	0.00541	0.485427
ZNF451	-0.21421	0.0107524	0.80157	0.00551	0.485427
PHF20	-0.209555	0.0150947	0.868314	0.00553	0.485427
CPT1A	-0.205069	0.0133481	0.847938	0.00555	0.485427
KRT39	-0.189854	0.0236355	0.92693	0.00557	0.485427
SECISBP2L	-0.215451	0.0108599	0.80157	0.0056	0.485427
HADH	-0.19521	0.0357326	0.999464	0.0056	0.485427
TYMS	-0.261755	0.00436105	0.645435	0.00562	0.485427
ATP6V1E1	0.318589	0.00677362	0.705461	0.00574	0.492713
HSD17B3	-0.230418	0.00655066	0.70493	0.00578	0.493084
NKX1-1	-0.27889	0.00396467	0.616205	0.00582	0.49345
GRM6	0.22094	0.0166734	0.886823	0.00593	0.493571
LIMS2	0.299736	0.00209862	0.50782	0.00597	0.493571
GAREM2	0.235143	0.0110577	0.80157	0.00597	0.493571
KRTAP29-1	-0.193235	0.0252846	0.931274	0.00598	0.493571
SLC46A1	-0.199771	0.0211437	0.89863	0.006	0.493571
RPL3L	-0.255721	0.00784916	0.736604	0.00612	0.500464
PLA2G4D	-0.194954	0.0200737	0.89863	0.00625	0.507501
CBLIF	-0.195044	0.0239222	0.92693	0.00633	0.507501
SLC7A6	-0.235857	0.0062754	0.704596	0.0064	0.507501
TAS2R3	-0.185249	0.0494871	0.999464	0.0064	0.507501
HMOX2	-0.212307	0.0149125	0.868314	0.00647	0.507501
NPB	-0.226471	0.0214285	0.89863	0.00649	0.507501
TMEM135	-0.271942	0.0028924	0.566747	0.00651	0.507501
CMC1	-0.262155	0.014754	0.868314	0.00653	0.507501
REV1	-0.237981	0.0035845	0.600984	0.00659	0.507501
ABCD3	-0.240032	0.00701333	0.707025	0.00659	0.507501
COQ9	-0.231059	0.00659649	0.70493	0.00661	0.507501
ARL14EP	-0.366656	0.00337743	0.600984	0.00668	0.510042
KEL	-0.203265	0.0135394	0.853349	0.0068	0.51504
EDN3	-0.203757	0.0268924	0.967007	0.00682	0.51504
SLC25A34	-0.217657	0.0151668	0.868314	0.00695	0.517515
SLC35G1	-0.164278	0.0524362	0.999464	0.00695	0.517515
RHOJ	0.275788	0.00851298	0.742535	0.007	0.517515
EPN3	-0.20488	0.014807	0.868314	0.00702	0.517515
IL1RL1	-0.182115	0.0300718	0.977876	0.00704	0.517515
CKMT1A	0.304355	0.00231192	0.518765	0.00719	0.517894
TRPV5	-0.164311	0.0559397	0.999464	0.0072	0.517894
CDH17	-0.176233	0.0287926	0.977876	0.00721	0.517894
KRTCAP3	-0.240357	0.00607516	0.704596	0.00725	0.517894
CWC27	0.211661	0.0164657	0.885041	0.00726	0.517894
NUDT8	-0.205393	0.026978	0.967314	0.00727	0.517894
C11orf16	0.178092	0.0434647	0.999464	0.00738	0.523034
SLC31A1	-0.238595	0.0105744	0.80157	0.00743	0.523891
PPCS	-0.224686	0.0117646	0.8044	0.00753	0.528246
FXYD1	-0.275241	0.00636077	0.704596	0.00764	0.530661
MFRP	0.223913	0.00805426	0.742535	0.00769	0.530661
LDHD	-0.187642	0.0243148	0.92693	0.00769	0.530661
CUX2	-0.224933	0.00822719	0.742535	0.00775	0.530661
TSPAN1	-0.206277	0.0180887	0.89863	0.00779	0.530661
KCNJ1	-0.201952	0.0244938	0.92693	0.00783	0.530661
ATN1	0.216239	0.020846	0.89863	0.00786	0.530661
GLUD1	-0.314896	0.00314695	0.59952	0.00788	0.530661
KRT16	-0.265336	0.00383715	0.613592	0.00791	0.530661
TIGD4	-0.198864	0.0227817	0.923479	0.00797	0.532103
TAS2R10	-0.201102	0.0387253	0.999464	0.00818	0.541283
CCKBR	0.21378	0.0201005	0.89863	0.00832	0.541283
SCNN1B	-0.19136	0.0291858	0.977876	0.00835	0.541283
PGA5	-0.256846	0.00626216	0.704596	0.00839	0.541283
ZC3H7A	-0.224884	0.00848407	0.742535	0.00841	0.541283
SUSD1	-0.193093	0.019117	0.89863	0.00841	0.541283
ACOT12	-0.200018	0.0204957	0.89863	0.00843	0.541283
COMT	-0.208294	0.0157291	0.87881	0.00844	0.541283
MYLIP	0.23034	0.0106979	0.80157	0.00846	0.541283
PF4	0.201711	0.0278179	0.974818	0.00855	0.54452
PHC1	0.215808	0.0119426	0.80653	0.00862	0.54646
ZC3H10	-0.30125	0.00391035	0.616205	0.0087	0.549013
FMO4	-0.187224	0.0491102	0.999464	0.00882	0.553414
ACADM	-0.216119	0.0168088	0.886823	0.00888	0.553414
MYH4	-0.223579	0.0111839	0.802015	0.00891	0.553414
HECW2	0.269579	0.00133098	0.487278	0.00898	0.553414
SLC39A3	-0.240676	0.0138533	0.864246	0.00899	0.553414
SERPINF1	-0.193836	0.0208121	0.89863	0.00901	0.553414
ACADVL	-0.187412	0.0230245	0.925771	0.00914	0.558888
AQP9	-0.224301	0.0100083	0.800202	0.00918	0.558888
LYVE1	-0.135463	0.103046	0.999464	0.00928	0.561852
LPL	-0.220855	0.0112463	0.802349	0.00931	0.561852
UMOD	-0.209699	0.0209727	0.89863	0.00952	0.57067
TMEM138	0.263903	0.0110256	0.80157	0.00955	0.57067
PEAK1	0.232405	0.00555135	0.702006	0.00958	0.57067
UROC1	-0.245688	0.00841789	0.742535	0.00964	0.57178
SULT1A2	-0.160323	0.0663065	0.999464	0.00974	0.575242
CLDN15	-0.189065	0.0292935	0.977876	0.00994	0.581545
MMP8	-0.19266	0.0211501	0.89863	0.01004	0.581545
ESS2	-0.225949	0.0127043	0.833691	0.01012	0.581545
PTAFR	-0.196823	0.022644	0.923479	0.01012	0.581545
CADM3	0.242608	0.0106586	0.80157	0.01013	0.581545
REM2	0.217219	0.0153778	0.873206	0.01013	0.581545
RABGGTB	0.252989	0.0210235	0.89863	0.01019	0.581545
DGLUCY	-0.222249	0.0160234	0.881096	0.01024	0.581545
ALYREF	-0.324457	0.00739078	0.719024	0.01028	0.581545
MAPKBP1	-0.184514	0.0247687	0.92693	0.0104	0.581545
NAB1	0.263965	0.00403067	0.616205	0.01043	0.581545
TRIM29	0.224894	0.00980784	0.793295	0.01044	0.581545
FFAR1	-0.212685	0.0151228	0.868314	0.01047	0.581545
LBH	0.291957	0.00638011	0.704596	0.01048	0.581545
SPINT4	-0.228862	0.018858	0.89863	0.01051	0.581545
MRPL24	0.203319	0.0323337	0.988584	0.01052	0.581545
SEMA6C	0.219665	0.00963357	0.787855	0.01068	0.58245
EHD4	-0.247765	0.0100807	0.801389	0.01074	0.58245
MAT1A	-0.250416	0.00695008	0.707025	0.01075	0.58245
ABCC1	-0.185689	0.0344156	0.998393	0.01078	0.58245
AMOTL1	0.19405	0.0241225	0.92693	0.01085	0.58245
REEP1	0.260922	0.00663786	0.70493	0.01086	0.58245
ST6GAL1	-0.203485	0.0202314	0.89863	0.01088	0.58245
HACD2	-0.26818	0.00758782	0.725732	0.01089	0.58245
TECRL	-0.192189	0.0261023	0.945664	0.01096	0.58245
SLC28A2	-0.221193	0.0135559	0.853349	0.01103	0.58245
ABHD11	-0.197544	0.0202093	0.89863	0.01109	0.58245
EPB42	-0.19351	0.0176612	0.89863	0.0111	0.58245
TENT5C	0.266912	0.00788916	0.736604	0.01128	0.58245
NFE2	-0.227663	0.0116708	0.8044	0.01128	0.58245
ANKRD35	0.19647	0.0204458	0.89863	0.0113	0.58245
RHOD	0.231301	0.0155239	0.877918	0.01132	0.58245
SORCS1	0.243023	0.00533584	0.693759	0.01138	0.58245
GRHPR	-0.209595	0.014326	0.868314	0.01138	0.58245
SNUPN	0.259183	0.0047758	0.662794	0.0114	0.58245
ACSS3	-0.237296	0.00722635	0.71461	0.01141	0.58245
GPR37	0.186457	0.0291397	0.977876	0.01151	0.58245
CTSK	0.217001	0.0159137	0.881096	0.01154	0.58245
VEZF1	-0.320214	0.0126225	0.832245	0.01155	0.58245
ASIC5	-0.223641	0.0140724	0.868314	0.01157	0.58245
BEND6	-0.268191	0.00567291	0.702006	0.01159	0.58245
SLC9A3	-0.211717	0.0187334	0.89863	0.01168	0.58473
MMP9	-0.159578	0.0518997	0.999464	0.01172	0.58473
H1-2	0.283703	0.00850877	0.742535	0.01178	0.58561
SPNS1	-0.192997	0.0284273	0.977876	0.01188	0.586125
MSH5	0.174994	0.0393558	0.999464	0.01188	0.586125
SAE1	0.248226	0.0127688	0.833988	0.01194	0.586125
MIA	-0.224025	0.0180957	0.89863	0.01196	0.586125
SMC5	-0.177644	0.0371169	0.999464	0.01215	0.593332
ACACA	-0.217663	0.0115241	0.8044	0.01245	0.601266
ALX1	0.284181	0.0128501	0.835378	0.01245	0.601266
PPIP5K1	-0.188941	0.0253704	0.931274	0.0125	0.601266
RAG1	0.208026	0.0114591	0.8044	0.01251	0.601266
UGT1A1	-0.177211	0.0445294	0.999464	0.01253	0.601266
PEX11B	0.260293	0.00856794	0.742535	0.01266	0.602191
MGST3	-0.238567	0.0109385	0.80157	0.01266	0.602191
RXRA	-0.274367	0.0110519	0.80157	0.01268	0.602191
AHI1	0.191442	0.021072	0.89863	0.01281	0.603764
KRT12	0.162899	0.0553618	0.999464	0.0129	0.603764
YES1	-0.233624	0.0187076	0.89863	0.01291	0.603764
CMTM3	-0.243202	0.0115971	0.8044	0.01295	0.603764
KLK8	-0.1924	0.0411892	0.999464	0.01303	0.603764
CYP11A1	-0.1849	0.0276022	0.973575	0.01304	0.603764
ALDOC	0.292376	0.00630145	0.704596	0.01308	0.603764
EMILIN2	-0.175007	0.0379273	0.999464	0.01313	0.603764
TTC22	0.197673	0.0220545	0.913918	0.01314	0.603764
GPN1	0.196905	0.0349278	0.998393	0.01315	0.603764
CAPZA3	-0.228194	0.0150601	0.868314	0.01326	0.605708
SLC4A1	-0.19901	0.0164081	0.885041	0.01328	0.605708
CHRNA3	0.222005	0.0156855	0.87881	0.01336	0.60672
EXOSC3	0.215779	0.0211254	0.89863	0.01339	0.60672
METTL26	-0.242554	0.0145293	0.868314	0.01346	0.607899
TSTA3	-0.204446	0.0277068	0.973575	0.01361	0.612671
USP33	0.251244	0.00700962	0.707025	0.01384	0.621002
DOK3	-0.181191	0.0347697	0.998393	0.0139	0.621676
ACTL7A	0.193255	0.0329453	0.991078	0.01397	0.622791
ATP8B1	-0.215042	0.00964315	0.787855	0.01412	0.627454
NTNG1	0.241674	0.015956	0.881096	0.01428	0.63253
GDPGP1	-0.181857	0.0347741	0.998393	0.01441	0.63625
SLC30A8	0.208226	0.021361	0.89863	0.01467	0.640355
KLHL28	0.235244	0.0256183	0.935439	0.01467	0.640355
ENPP7	-0.208821	0.0204543	0.89863	0.01473	0.640355
DYNC1I1	-0.28429	0.00761622	0.725732	0.01474	0.640355
TMPRSS11D	-0.145449	0.086404	0.999464	0.01476	0.640355
KMT2A	0.249381	0.00257608	0.540847	0.01487	0.640355
DDT	-0.205492	0.0445887	0.999464	0.01487	0.640355
AMBN	-0.173043	0.0416383	0.999464	0.01491	0.640355
FFAR4	-0.184556	0.0483235	0.999464	0.01492	0.640355
PARP11	0.266974	0.00968395	0.787855	0.0151	0.645075
CRYZ	-0.221807	0.0144817	0.868314	0.01513	0.645075
SLC44A2	-0.220943	0.0148787	0.868314	0.01517	0.645075
ABCB11	-0.17596	0.0330187	0.991078	0.01526	0.646201
TRIM8	-0.297692	0.014421	0.868314	0.01529	0.646201
RNF224	-0.186746	0.0428842	0.999464	0.01534	0.646338
SH2D3C	-0.19016	0.0265932	0.960946	0.01539	0.646473
FSD1	-0.229038	0.0160921	0.881392	0.01545	0.646876
WSB1	0.261137	0.00685567	0.70649	0.01554	0.646876
HPX	-0.173706	0.045544	0.999464	0.01554	0.646876
GFPT2	0.242484	0.0118532	0.8044	0.01576	0.654063
TOP2A	0.18941	0.0229819	0.925771	0.01585	0.655829
HSD17B4	-0.178992	0.0356808	0.999464	0.0159	0.655934
CLEC9A	-0.164372	0.0647988	0.999464	0.01597	0.656861
SRRT	-0.212377	0.0232977	0.92693	0.01606	0.658603
ULK3	0.198624	0.0234872	0.92693	0.01617	0.661152
SOS1	0.234263	0.0146767	0.868314	0.01629	0.663766
AICDA	-0.287165	0.0184642	0.89863	0.01633	0.663766
PF4V1	0.182848	0.0465477	0.999464	0.01642	0.665467
NUDT3	-0.302369	0.0115635	0.8044	0.01651	0.667158
ELK3	0.209025	0.029163	0.977876	0.01664	0.670451
OXGR1	-0.208881	0.0199024	0.89863	0.01672	0.671716
P2RY6	-0.230308	0.0159855	0.881096	0.01677	0.671772
SLC26A4	-0.18679	0.0294492	0.977876	0.01688	0.674224
TMCO4	-0.160149	0.063532	0.999464	0.01694	0.674671
MAOA	-0.151594	0.0851223	0.999464	0.01712	0.678328
DTWD1	-0.191501	0.0317064	0.983499	0.01713	0.678328
CD34	-0.19645	0.0191213	0.89863	0.01737	0.684363
RBM15	0.162637	0.0688298	0.999464	0.01743	0.684363
MYBPC1	-0.178032	0.0333954	0.994854	0.01745	0.684363
DIO1	-0.179027	0.0504118	0.999464	0.01751	0.684363
PPM1M	-0.185381	0.03135	0.982299	0.01753	0.684363
AC093512	0.243319	0.028608	0.977876	0.01779	0.689851
ZNF593	0.24157	0.0130422	0.840016	0.01785	0.689851
PTGS1	-0.182797	0.0413077	0.999464	0.01791	0.689851
PDPR	-0.209698	0.019413	0.89863	0.01793	0.689851
PPP6C	0.244831	0.0276038	0.973575	0.01796	0.689851
TMEM41B	-0.186489	0.0568037	0.999464	0.018	0.689851
KRT32	-0.201908	0.0179796	0.89863	0.01802	0.689851
BUB1	-0.189676	0.0253258	0.931274	0.0181	0.691
CYP19A1	-0.18082	0.0331571	0.991078	0.01836	0.691
CXCL6	0.204578	0.0345386	0.998393	0.01842	0.691
SDS	-0.209211	0.0164768	0.885041	0.01845	0.691
RAB29	0.261891	0.0103558	0.80157	0.01847	0.691
ALDH1A1	-0.222209	0.0147165	0.868314	0.01852	0.691
RGSL1	-0.178964	0.0350349	0.998393	0.01853	0.691
KCNK15	-0.169765	0.0775969	0.999464	0.01858	0.691
NDRG2	-0.232907	0.0179061	0.89863	0.01863	0.691
KCTD1	-0.273324	0.0124145	0.822428	0.0187	0.691
DCAF13	-0.129272	0.139594	0.999464	0.01871	0.691
PCMTD1	0.271159	0.0221778	0.913918	0.01875	0.691
SLC9A4	-0.197024	0.0200861	0.89863	0.01876	0.691
ABCD4	-0.182607	0.0326988	0.991078	0.01879	0.691
GCDH	-0.183487	0.0312246	0.980579	0.01882	0.691
TCIRG1	0.153109	0.0719465	0.999464	0.01885	0.691
SHROOM3	0.208431	0.0168925	0.886823	0.01906	0.696849
CYBRD1	-0.179479	0.0358543	0.999464	0.01913	0.697563
URAD	-0.227153	0.0150794	0.868314	0.01926	0.700455
NUBP1	-0.197959	0.0268999	0.967007	0.01941	0.7033
SDAD1	0.182885	0.0317925	0.983499	0.01944	0.7033
ZNF574	0.220993	0.0166464	0.886823	0.01974	0.708809
GREB1L	-0.185169	0.0247459	0.92693	0.01976	0.708809
DLG4	0.198196	0.0761168	0.999464	0.01983	0.708809
RHO	0.211451	0.0280352	0.977587	0.01985	0.708809
FFAR2	-0.16178	0.0544198	0.999464	0.01986	0.708809
GLE1	0.183158	0.037743	0.999464	0.0199	0.708809
TXK	0.170935	0.0491581	0.999464	0.02	0.709072
YTHDC1	-0.231326	0.0212355	0.89863	0.02001	0.709072
HIBCH	-0.180939	0.0324033	0.988584	0.02024	0.714973
ZNF579	-0.281315	0.00479185	0.662794	0.02028	0.714973
PARP9	-0.137051	0.115703	0.999464	0.02051	0.718363
SNW1	0.180854	0.0471287	0.999464	0.02058	0.718363
MYO1A	-0.154699	0.0578791	0.999464	0.02058	0.718363
CCDC3	0.218921	0.0360281	0.999464	0.02067	0.718363
HSD17B8	-0.184986	0.0397015	0.999464	0.02069	0.718363
LURAP1L	-0.199755	0.0315678	0.982485	0.02072	0.718363
HOXB3	-0.240987	0.0245436	0.92693	0.02074	0.718363
PGAP6	-0.154788	0.0630302	0.999464	0.02082	0.719331
XKR6	-0.245101	0.0121516	0.812758	0.02092	0.719533
EDEM1	-0.202449	0.0259512	0.942646	0.02093	0.719533
QDPR	-0.243061	0.0202579	0.89863	0.02124	0.72726
KCNA1	-0.272831	0.0120422	0.809331	0.02126	0.72726
DAB2	-0.165956	0.0476037	0.999464	0.02142	0.730924
PCSK7	0.189507	0.0233986	0.92693	0.0215	0.730969
AGER	0.170373	0.0411906	0.999464	0.02156	0.730969
GPC6	-0.234477	0.0141236	0.868314	0.02158	0.730969
TMPRSS15	-0.181601	0.0277125	0.973575	0.02181	0.736954
SH2D5	0.17615	0.0433437	0.999464	0.02238	0.754369
SARDH	-0.167232	0.0534413	0.999464	0.02255	0.75825
SEC16A	-0.144818	0.0811584	0.999464	0.02283	0.759438
ENG	-0.155787	0.0604242	0.999464	0.02284	0.759438
ACOT8	-0.168921	0.0537628	0.999464	0.02288	0.759438
ROBO3	0.167569	0.0410844	0.999464	0.02293	0.759438
HJURP	-0.195528	0.0275936	0.973575	0.02295	0.759438
IL18	0.15176	0.0847763	0.999464	0.02296	0.759438
GMCL1	-0.236784	0.0108396	0.80157	0.02297	0.759438
TMEM184A	-0.133514	0.119853	0.999464	0.02314	0.763233
NME2	0.266151	0.0193025	0.89863	0.02327	0.764684
VDR	-0.175692	0.039284	0.999464	0.02333	0.764684
RBM38	0.253496	0.0131863	0.843733	0.02335	0.764684
PAK3	-0.304982	0.0168506	0.886823	0.02345	0.766144
SRPRB	0.188071	0.0364594	0.999464	0.02353	0.766944
TIMP1	0.18068	0.0492524	0.999464	0.02359	0.766994
NEUROG1	-0.218161	0.0214352	0.89863	0.02366	0.766994
MCFD2	-0.185793	0.0430708	0.999464	0.02382	0.766994
GSTO1	-0.181429	0.0404093	0.999464	0.02389	0.766994
TSG101	0.277459	0.0111007	0.80157	0.0239	0.766994
SLC37A3	-0.196997	0.0241163	0.92693	0.02392	0.766994
SLC26A1	-0.163804	0.0605506	0.999464	0.02392	0.766994
ADHFE1	-0.186312	0.0304952	0.977876	0.02408	0.768558
CD44	-0.158293	0.0514445	0.999464	0.02408	0.768558
ISLR	0.195184	0.0238195	0.92693	0.02418	0.769971
ABCB1	-0.147392	0.0822391	0.999464	0.02432	0.771194
RHD	-0.162221	0.0591797	0.999464	0.02433	0.771194
ZNF287	-0.19042	0.0364332	0.999464	0.02455	0.775876
ARID3C	-0.178393	0.0377189	0.999464	0.02459	0.775876
FAM83D	0.158481	0.0643587	0.999464	0.02471	0.777492
MAN2A1	-0.141474	0.0896251	0.999464	0.02478	0.777492
BX255925	-0.184931	0.0498866	0.999464	0.02481	0.777492
CISD3	-0.16729	0.067808	0.999464	0.02487	0.777609
OR6B1	0.194393	0.0399932	0.999464	0.02499	0.779597
CIAO1	-0.202976	0.0351326	0.998393	0.02522	0.78344
CAMKK2	0.166969	0.0585913	0.999464	0.02528	0.78344
RSPO1	0.178293	0.0449104	0.999464	0.02531	0.78344
HDDC3	0.242789	0.0211267	0.89863	0.02543	0.78344
SPINT1	-0.152859	0.0645482	0.999464	0.02546	0.78344
CEBPG	0.240892	0.023768	0.92693	0.0255	0.78344
HOGA1	-0.19281	0.0312182	0.980579	0.02551	0.78344
SNX7	0.18414	0.0338593	0.998393	0.02557	0.783542
MOG	0.183526	0.0396814	0.999464	0.0257	0.785353
MYO18B	0.156809	0.0703897	0.999464	0.02578	0.785353
PRKCD	-0.181972	0.0375066	0.999464	0.02588	0.785353
PDC	0.205538	0.0209506	0.89863	0.02589	0.785353
DSC3	0.134131	0.0994604	0.999464	0.02596	0.785353
PDE11A	0.174874	0.0373874	0.999464	0.02598	0.785353
KIF13A	0.210291	0.0123183	0.819962	0.02612	0.785353
FBXL13	-0.165702	0.0595519	0.999464	0.02645	0.785353
PLA2G12A	-0.234433	0.0253059	0.931274	0.02646	0.785353
PYURF	0.192668	0.0437402	0.999464	0.02655	0.785353
SHISAL2B	0.195497	0.0302362	0.977876	0.0266	0.785353
LDOC1	0.205554	0.0748542	0.999464	0.02666	0.785353
GCH1	0.239406	0.014868	0.868314	0.02677	0.785353
DECR2	-0.210348	0.0200434	0.89863	0.02677	0.785353
ZIC5	-0.194949	0.0473518	0.999464	0.02683	0.785353
RIDA	-0.193734	0.0455601	0.999464	0.02687	0.785353
CHAC2	-0.208596	0.0392806	0.999464	0.02713	0.785353
TSPO2	-0.179344	0.0509841	0.999464	0.02714	0.785353
TRAF6	0.168526	0.0465461	0.999464	0.02716	0.785353
PCDH1	0.180225	0.0434424	0.999464	0.02728	0.785353
GATM	-0.217916	0.0221976	0.913918	0.02729	0.785353
FSD1L	-0.21188	0.0172303	0.897783	0.02735	0.785353
ATG14	0.197928	0.0295417	0.977876	0.02735	0.785353
CKAP2L	-0.186226	0.0331974	0.991078	0.02739	0.785353
GCA	-0.172823	0.0510819	0.999464	0.02739	0.785353
GNS	0.183444	0.0318949	0.983499	0.02743	0.785353
ESYT3	0.198026	0.0194496	0.89863	0.02751	0.785353
RAB31	-0.247967	0.0256152	0.935439	0.02751	0.785353
SCAP	0.167102	0.0492807	0.999464	0.02765	0.785353
FAM126A	-0.168818	0.0664548	0.999464	0.02765	0.785353
TTC9	0.247213	0.0175124	0.89863	0.0277	0.785353
PPM1G	0.20648	0.040315	0.999464	0.02773	0.785353
JPH1	-0.190587	0.0305059	0.977876	0.02776	0.785353
SYNJ2BP	0.220095	0.033043	0.991078	0.0278	0.785353
C21orf62	0.20475	0.0311114	0.980579	0.02785	0.785353
NTN4	0.199842	0.0210964	0.89863	0.02786	0.785353
IPCEF1	-0.169657	0.0466639	0.999464	0.02789	0.785353
SPATA4	0.163627	0.055156	0.999464	0.02796	0.785353
SLC25A15	-0.227561	0.0207932	0.89863	0.028	0.785353
SLC22A2	-0.169406	0.046188	0.999464	0.02815	0.785353
MYLK3	0.16961	0.0537092	0.999464	0.02819	0.785353
PPP1R36	-0.158053	0.0641014	0.999464	0.02824	0.785353
ACSL1	-0.180145	0.0295685	0.977876	0.02826	0.785353
GOT1	-0.183928	0.03547	0.999464	0.02827	0.785353
IST1	0.209595	0.0302556	0.977876	0.02829	0.785353
ATP6V1C2	-0.190981	0.0314919	0.982323	0.0283	0.785353
ORC3	-0.168861	0.0437939	0.999464	0.0283	0.785353
NOC4L	0.16541	0.0620529	0.999464	0.02851	0.787163
RASGEF1B	0.187684	0.0436445	0.999464	0.02856	0.787163
TOR1AIP1	-0.183283	0.0399489	0.999464	0.02861	0.787163
CYP26C1	-0.161221	0.0679632	0.999464	0.02861	0.787163
DGCR6	-0.194506	0.0562493	0.999464	0.02865	0.787163
ELOVL7	-0.176519	0.0558615	0.999464	0.02883	0.788903
CFAP299	0.194538	0.0297076	0.977876	0.02884	0.788903
KCTD12	-0.332793	0.00822041	0.742535	0.0289	0.788903
P2RY2	-0.176595	0.0536757	0.999464	0.02899	0.788903
GTF2F1	0.204028	0.0350376	0.998393	0.0291	0.788903
GATD1	0.200662	0.0442158	0.999464	0.02914	0.788903
PHKA2	-0.184749	0.0300614	0.977876	0.02915	0.788903
GABBR1	0.225612	0.0183339	0.89863	0.02917	0.788903
POC1A	0.17738	0.0434929	0.999464	0.02928	0.790331
PTPN6	0.185092	0.0438778	0.999464	0.02935	0.790676
SLC22A7	-0.16522	0.0564203	0.999464	0.02951	0.79344
N4BP3	0.200631	0.0242848	0.92693	0.02988	0.800063
PIGO	-0.179149	0.0304955	0.977876	0.02991	0.800063
PC	-0.166896	0.0577145	0.999464	0.02993	0.800063
MFHAS1	0.217157	0.0197429	0.89863	0.0301	0.801096
ZFHX4	0.203614	0.0297909	0.977876	0.03022	0.801096
PTPN14	0.198803	0.0185357	0.89863	0.03026	0.801096
ATOH8	0.205079	0.0349569	0.998393	0.03029	0.801096
TMEM216	0.204441	0.0605423	0.999464	0.03032	0.801096
IL17RD	0.157056	0.0619585	0.999464	0.03047	0.801096
AAGAB	0.201768	0.0223777	0.915642	0.03066	0.801096
PXMP4	-0.187273	0.041408	0.999464	0.03071	0.801096
BEND3	0.198284	0.0221432	0.913918	0.03076	0.801096
ITGA2B	-0.151283	0.0683416	0.999464	0.03082	0.801096
TIAM2	0.172597	0.0385772	0.999464	0.03084	0.801096
DMGDH	-0.179691	0.0363254	0.999464	0.0309	0.801096
TMEM268	-0.195529	0.0346261	0.998393	0.03091	0.801096
OPN1LW	0.190595	0.0413182	0.999464	0.03096	0.801096
DTWD2	-0.161013	0.078946	0.999464	0.03096	0.801096
TMEM242	0.195389	0.0407948	0.999464	0.03099	0.801096
SEC16B	-0.146333	0.0739618	0.999464	0.03103	0.801096
RRP7A	-0.163981	0.072295	0.999464	0.03105	0.801096
MMP11	-0.173292	0.0452441	0.999464	0.03107	0.801096
TMED1	-0.23699	0.0289772	0.977876	0.03129	0.803363
RNF214	0.223883	0.0107557	0.80157	0.03131	0.803363
IQSEC2	0.240671	0.0153355	0.873206	0.03134	0.803363
FRAS1	0.192349	0.0195936	0.89863	0.03143	0.803363
CYP24A1	-0.164921	0.0459144	0.999464	0.03154	0.803363
MDH2	0.191277	0.0578864	0.999464	0.03175	0.803363
PRAG1	0.158226	0.0792326	0.999464	0.03179	0.803363
SLC35A5	-0.17627	0.0423995	0.999464	0.03183	0.803363
THEM4	-0.178815	0.0558676	0.999464	0.03183	0.803363
NDUFA11	0.156971	0.0882206	0.999464	0.03189	0.803363
BIN1	0.194993	0.0320905	0.983499	0.0319	0.803363
BARHL2	0.212999	0.0299389	0.977876	0.03198	0.803363
C8orf76	0.172361	0.0417117	0.999464	0.03201	0.803363
NR1H4	-0.177018	0.0423057	0.999464	0.03207	0.803363
GIMD1	-0.17832	0.0440268	0.999464	0.03217	0.803363
EPB41	-0.165103	0.0547503	0.999464	0.03217	0.803363
DMBX1	-0.227762	0.0248523	0.92693	0.03231	0.803363
GPAT3	-0.204071	0.0247579	0.92693	0.0325	0.803363
HFM1	-0.152908	0.0682728	0.999464	0.03254	0.803363
TFF3	-0.191614	0.048025	0.999464	0.03262	0.803363
SLC26A7	-0.148419	0.0718182	0.999464	0.03262	0.803363
RAMAC	0.223945	0.0309338	0.980579	0.03275	0.803363
CPA1	-0.16892	0.0484669	0.999464	0.03275	0.803363
TMED6	-0.177035	0.0464682	0.999464	0.03277	0.803363
SLC26A9	-0.165522	0.0429446	0.999464	0.03278	0.803363
ATP11C	-0.193819	0.0248378	0.92693	0.03281	0.803363
GDE1	-0.199931	0.0292555	0.977876	0.03288	0.803363
IL17RA	0.157122	0.0637446	0.999464	0.0329	0.803363
PAQR3	0.254287	0.0246647	0.92693	0.03296	0.803363
MAD2L2	-0.248442	0.0459836	0.999464	0.03296	0.803363
DAND5	-0.167915	0.0728495	0.999464	0.03296	0.803363
CEACAM16	-0.192756	0.0286299	0.977876	0.03303	0.803652
PHF19	0.183458	0.053935	0.999464	0.03322	0.806854
SLC6A18	-0.140678	0.0961373	0.999464	0.03343	0.807606
ARHGEF17	-0.193664	0.031851	0.983499	0.03348	0.807606
SHISA3	0.228779	0.0227439	0.923479	0.03353	0.807606
CD36	-0.163824	0.0635785	0.999464	0.03353	0.807606
MIOS	-0.231324	0.0311013	0.980579	0.03357	0.807606
UBASH3B	0.210183	0.0290126	0.977876	0.03365	0.807606
TACR2	0.154049	0.0837713	0.999464	0.03366	0.807606
MYMK	-0.190458	0.0423827	0.999464	0.03372	0.807643
TOB2	0.192929	0.0311121	0.980579	0.03386	0.809593
NQO1	-0.217304	0.0202102	0.89863	0.03399	0.810031
LGALS8	-0.15983	0.0661096	0.999464	0.03403	0.810031
CYP4B1	-0.165707	0.0585544	0.999464	0.03413	0.810031
AC092835	-0.173997	0.0504165	0.999464	0.03419	0.810031
DBNL	0.135987	0.120007	0.999464	0.03419	0.810031
CCDC134	0.197138	0.0380914	0.999464	0.03423	0.810031
PGK1	0.213638	0.0310837	0.980579	0.03437	0.810867
OPRD1	-0.233078	0.0118048	0.8044	0.0344	0.810867
HGD	-0.160787	0.0732511	0.999464	0.03447	0.810867
SORD	-0.146711	0.0944944	0.999464	0.0345	0.810867
THRSP	0.17209	0.0624052	0.999464	0.03459	0.811602
PKD2L1	0.15431	0.0772919	0.999464	0.03481	0.815169
CILK1	0.165011	0.0586536	0.999464	0.03486	0.815169
EIF4E3	0.238872	0.0241708	0.92693	0.03512	0.816038
FBXL15	-0.251379	0.01685	0.886823	0.03532	0.816038
RXFP2	-0.17193	0.0469883	0.999464	0.0356	0.816038
CTH	-0.146573	0.0948091	0.999464	0.03563	0.816038
AGBL4	-0.192432	0.0430315	0.999464	0.03568	0.816038
TIMP2	0.280064	0.0171851	0.897783	0.03572	0.816038
OPA3	0.144424	0.130454	0.999464	0.0358	0.816038
ZNF609	0.201337	0.0237788	0.92693	0.03587	0.816038
KCTD16	0.232566	0.027397	0.973575	0.03587	0.816038
PCK1	-0.16474	0.0476906	0.999464	0.03592	0.816038
WDR7	0.181235	0.0302954	0.977876	0.03593	0.816038
TRIM44	0.224978	0.0251651	0.931274	0.03599	0.816038
AXIN1	-0.163944	0.0613289	0.999464	0.03612	0.816038
EIF5B	-0.186002	0.028944	0.977876	0.03614	0.816038
SGCE	-0.204135	0.0272687	0.973	0.03615	0.816038
SLC44A1	-0.190892	0.0392422	0.999464	0.03618	0.816038
RELN	0.157003	0.0639488	0.999464	0.0362	0.816038
SPINK4	-0.181448	0.0614243	0.999464	0.03624	0.816038
DHX8	0.199782	0.0346933	0.998393	0.03625	0.816038
ECHDC3	0.197853	0.0214336	0.89863	0.03626	0.816038
ZBED8	-0.190109	0.0568846	0.999464	0.03627	0.816038
HSD17B13	-0.197476	0.0424525	0.999464	0.03646	0.816038
ATP13A5	-0.159926	0.0505946	0.999464	0.03648	0.816038
CBX6	-0.15281	0.0970903	0.999464	0.03651	0.816038
RUNX3	-0.195609	0.0511309	0.999464	0.03655	0.816038
TMEM141	0.197111	0.0449022	0.999464	0.03661	0.816038
SNX5	0.208052	0.0368186	0.999464	0.03663	0.816038
CBLL1	0.241401	0.0320952	0.983499	0.03709	0.816038
DNAJA4	0.204274	0.0299872	0.977876	0.03712	0.816038
GPR155	-0.176993	0.0378285	0.999464	0.03714	0.816038
CDC16	-0.20696	0.0368805	0.999464	0.03716	0.816038
POU6F2	0.202738	0.0222577	0.913918	0.03722	0.816038
PIGZ	-0.16554	0.0628928	0.999464	0.03727	0.816038
DPF1	-0.296764	0.0213066	0.89863	0.03737	0.816038
GORAB	0.192326	0.0191903	0.89863	0.03741	0.816038
TRPC6	0.170064	0.0477706	0.999464	0.03748	0.816038
SLC6A12	-0.170177	0.0414274	0.999464	0.03753	0.816038
CFAP47	-0.16271	0.0733511	0.999464	0.03756	0.816038
PDS5A	0.219827	0.01877	0.89863	0.0377	0.816038
BFSP2	0.158473	0.0674225	0.999464	0.0377	0.816038
DIABLO	-0.191576	0.0385303	0.999464	0.03773	0.816038
NUDT7	-0.144625	0.103363	0.999464	0.03778	0.816038
LIX1L	-0.233985	0.0433336	0.999464	0.03785	0.816038
SSC4D	-0.178972	0.0504845	0.999464	0.03785	0.816038
RAD23A	-0.199317	0.0395675	0.999464	0.03787	0.816038
IQSEC3	-0.149012	0.0857265	0.999464	0.03811	0.816038
EMX1	-0.266499	0.0280375	0.977587	0.03817	0.816038
RFX6	0.157939	0.060487	0.999464	0.03817	0.816038
SMAGP	-0.189967	0.0797919	0.999464	0.03817	0.816038
SLC6A20	-0.221089	0.0132212	0.843733	0.03818	0.816038
CBS	-0.183474	0.0381683	0.999464	0.03819	0.816038
SERPINA7	-0.179209	0.0634852	0.999464	0.03824	0.816038
TUFT1	0.189377	0.0284132	0.977876	0.0383	0.816038
HCRTR2	0.205238	0.0426299	0.999464	0.03837	0.816038
POLR2M	0.162421	0.0526089	0.999464	0.03839	0.816038
TMEM209	0.184898	0.0450225	0.999464	0.0384	0.816038
OTUD7B	0.184799	0.034593	0.998393	0.03841	0.816038
HIGD1B	-0.207067	0.0331921	0.991078	0.03843	0.816038
PGC	-0.16377	0.0763876	0.999464	0.03843	0.816038
TIMM23	-0.240125	0.0436923	0.999464	0.03844	0.816038
FBXO38	0.216765	0.0194282	0.89863	0.03871	0.81721
MTFR1L	-0.233406	0.0326177	0.991078	0.03874	0.81721
CD79A	-0.120602	0.152813	0.999464	0.03877	0.81721
ERCC2	-0.190674	0.0470324	0.999464	0.03878	0.81721
CLRN3	-0.181694	0.0393274	0.999464	0.03883	0.81721
PFKM	-0.159257	0.0583447	0.999464	0.03885	0.81721
SLC6A6	-0.137004	0.121568	0.999464	0.03898	0.818585
CA4	-0.151951	0.0710428	0.999464	0.03909	0.818585
GTF2I	-0.216741	0.0294762	0.977876	0.03912	0.818585
MRS2	0.163967	0.0573955	0.999464	0.03917	0.818585
GAMT	-0.198485	0.0376473	0.999464	0.03924	0.818585
TIMM22	0.196389	0.0490298	0.999464	0.03932	0.818585
ABCG5	-0.149085	0.0766013	0.999464	0.03933	0.818585
MAL	-0.226464	0.0328375	0.991078	0.03954	0.818993
CDKN2B	0.20262	0.0465467	0.999464	0.03954	0.818993
KLHDC9	0.175052	0.0446863	0.999464	0.03975	0.818993
GJB7	0.235674	0.0182524	0.89863	0.03977	0.818993
POU6F1	0.166891	0.0539367	0.999464	0.03978	0.818993
FADS2	-0.1757	0.0490782	0.999464	0.03986	0.818993
EFNA3	0.237105	0.0378694	0.999464	0.03987	0.818993
SPACA4	0.174688	0.0595964	0.999464	0.03991	0.818993
CCR2	0.146029	0.102766	0.999464	0.03994	0.818993
ATP13A3	-0.188679	0.025048	0.931274	0.04001	0.818993
PCLAF	0.200723	0.0475044	0.999464	0.04007	0.818993
ADRA1D	-0.183916	0.0616377	0.999464	0.04009	0.818993
CRYBA1	0.22876	0.0320501	0.983499	0.04012	0.818993
PM20D1	-0.154855	0.0687255	0.999464	0.04019	0.819212
HNF4A	0.213033	0.0414627	0.999464	0.04031	0.819299
LCMT2	-0.132661	0.118169	0.999464	0.04032	0.819299
RPP25	0.209401	0.0416894	0.999464	0.04045	0.819299
OTOA	-0.153783	0.0706883	0.999464	0.04045	0.819299
ATIC	0.176907	0.0416477	0.999464	0.04051	0.819299
SPATA22	-0.16546	0.0599303	0.999464	0.04055	0.819299
FAT3	0.213472	0.00871799	0.742535	0.04066	0.819544
TRPM2	-0.20037	0.0222699	0.913918	0.04072	0.819544
HEXD	-0.127156	0.168183	0.999464	0.04074	0.819544
GRIN2D	-0.200182	0.0426214	0.999464	0.04096	0.82045
INO80E	-0.258019	0.0164614	0.885041	0.04102	0.82045
CORO1C	-0.192143	0.035516	0.999464	0.04112	0.82045
RHCE	-0.146391	0.0758326	0.999464	0.04122	0.82045
FN3K	-0.183377	0.0478109	0.999464	0.04123	0.82045
NDUFB10	0.178454	0.0521648	0.999464	0.04125	0.82045
COG6	0.191044	0.0301028	0.977876	0.04126	0.82045
PADI6	-0.161983	0.0614995	0.999464	0.04126	0.82045
EMC1	-0.160738	0.0569006	0.999464	0.04159	0.823877
INSIG1	-0.157203	0.0891175	0.999464	0.04159	0.823877
CRYBA4	0.231852	0.0360885	0.999464	0.04168	0.823877
CENPH	0.156466	0.0720957	0.999464	0.04171	0.823877
ZDHHC14	0.206289	0.0405035	0.999464	0.04176	0.823877
AGGF1	-0.16841	0.0451304	0.999464	0.04179	0.823877
C1orf159	-0.139557	0.126843	0.999464	0.04193	0.824096
HPD	-0.179328	0.0404152	0.999464	0.04194	0.824096
TTI1	0.150401	0.0643869	0.999464	0.04198	0.824096
HARS1	0.152451	0.0833527	0.999464	0.04208	0.824887
SLC9A8	0.167988	0.0851989	0.999464	0.04217	0.82529
CHST14	-0.192811	0.042615	0.999464	0.04222	0.82529
ADA	0.134413	0.118728	0.999464	0.04229	0.825491
AP001453	-0.161381	0.0733542	0.999464	0.04254	0.8292
GSE1	0.176062	0.035433	0.999464	0.04263	0.829784
LY96	-0.149559	0.0857615	0.999464	0.04274	0.830165
RNF144B	0.19411	0.0344043	0.998393	0.04285	0.830165
ACACB	-0.159939	0.0600053	0.999464	0.04292	0.830165
TOP2B	-0.175798	0.0480443	0.999464	0.04294	0.830165
LPP	-0.160892	0.067449	0.999464	0.043	0.830165
CCDC125	0.185753	0.0373008	0.999464	0.04301	0.830165
MCL1	-0.183682	0.0659628	0.999464	0.04309	0.830549
ATP6V0A4	-0.154439	0.0705117	0.999464	0.04337	0.83244
CCNB1IP1	0.189833	0.0585307	0.999464	0.04352	0.83244
EIF2AK1	-0.165452	0.057972	0.999464	0.04355	0.83244
VPS45	0.160982	0.0705996	0.999464	0.04356	0.83244
RANGRF	0.154295	0.08972	0.999464	0.0436	0.83244
PLEKHJ1	-0.169416	0.0702895	0.999464	0.04363	0.83244
SCIN	0.163122	0.0626577	0.999464	0.04364	0.83244
CASTOR1	-0.201305	0.0375993	0.999464	0.04367	0.83244
KIF26B	0.176757	0.0468183	0.999464	0.04375	0.832792
HLX	0.165608	0.0706601	0.999464	0.04387	0.832792
ARPIN	0.188181	0.0327085	0.991078	0.04402	0.832792
PDE7B	0.149068	0.0880235	0.999464	0.04403	0.832792
LMLN2	0.140643	0.0974315	0.999464	0.04403	0.832792
TPD52L2	-0.193753	0.035531	0.999464	0.04405	0.832792
SCNN1G	-0.136108	0.127058	0.999464	0.04416	0.833536
POLDIP2	0.217469	0.041821	0.999464	0.04421	0.833536
SLC22A1	-0.161119	0.0762452	0.999464	0.04434	0.834848
PLEKHO1	0.190089	0.0383907	0.999464	0.04442	0.835216
ARID2	0.186595	0.0349507	0.998393	0.04449	0.835396
CD86	-0.105061	0.230565	0.999464	0.04475	0.838375
MTMR11	0.149909	0.070917	0.999464	0.04477	0.838375
OVOL1	0.213107	0.029058	0.977876	0.04492	0.839244
SLC7A2	-0.150224	0.0786332	0.999464	0.04506	0.839244
FAM177A1	-0.177412	0.0468793	0.999464	0.0451	0.839244
SH2B2	-0.185442	0.046265	0.999464	0.04511	0.839244
SIK3	0.186493	0.0237167	0.92693	0.04512	0.839244
SPIRE2	-0.13662	0.112743	0.999464	0.04537	0.841861
SLC35B1	-0.208632	0.0272765	0.973	0.04544	0.841861
CWH43	0.167048	0.0574844	0.999464	0.0455	0.841861
ISG20	0.132482	0.13448	0.999464	0.04561	0.841861
PAX7	0.143105	0.1254	0.999464	0.04569	0.841861
TAF4B	0.171207	0.0479365	0.999464	0.04578	0.841861
FIBIN	0.206283	0.052444	0.999464	0.04579	0.841861
C8orf82	-0.156755	0.0846599	0.999464	0.04587	0.841861
PRR30	0.138286	0.124061	0.999464	0.0459	0.841861
PIK3R6	0.142957	0.106055	0.999464	0.04602	0.841861
TMEM51	-0.141783	0.11474	0.999464	0.04612	0.841861
ZFAND6	0.225846	0.0304129	0.977876	0.04614	0.841861
PLSCR4	0.174265	0.0548937	0.999464	0.04614	0.841861
EXO5	-0.151786	0.0884713	0.999464	0.04623	0.841861
METTL15	0.144225	0.0902835	0.999464	0.04625	0.841861
SLC2A2	-0.14916	0.0733556	0.999464	0.04631	0.841861
COPZ2	0.197701	0.0422125	0.999464	0.04642	0.841861
DSE	0.178059	0.0346501	0.998393	0.04648	0.841861
GGTLC3	-0.179252	0.0501187	0.999464	0.04664	0.841861
LIAS	0.173644	0.0508939	0.999464	0.04665	0.841861
PODXL2	-0.174048	0.0494338	0.999464	0.04671	0.841861
CPO	-0.164966	0.0864914	0.999464	0.04674	0.841861
PIGG	-0.152627	0.0829932	0.999464	0.04677	0.841861
ANGPTL8	-0.171414	0.0476638	0.999464	0.04686	0.841861
GTF3C3	0.161892	0.0798693	0.999464	0.04693	0.841861
RXFP3	0.178433	0.0597943	0.999464	0.04694	0.841861
PKP3	0.15337	0.095858	0.999464	0.04694	0.841861
OGFOD1	0.131851	0.115186	0.999464	0.04702	0.841861
BCKDK	-0.198305	0.0540508	0.999464	0.04703	0.841861
PATL1	0.178796	0.0478534	0.999464	0.04713	0.841861
PBLD	-0.15348	0.0733577	0.999464	0.04715	0.841861
TTC39B	-0.151768	0.0734503	0.999464	0.04721	0.841861
PRRG2	-0.155869	0.0864555	0.999464	0.04732	0.842735
OR4C3	-0.170349	0.08232	0.999464	0.04745	0.84286
TCF15	-0.225271	0.0536381	0.999464	0.04748	0.84286
MRC2	0.127723	0.128467	0.999464	0.04751	0.84286
C3orf20	-0.130022	0.141933	0.999464	0.04762	0.843398
BBS7	-0.138031	0.115897	0.999464	0.04777	0.843398
XKR7	-0.182478	0.0442508	0.999464	0.04784	0.843398
ICAM1	-0.122197	0.154877	0.999464	0.04788	0.843398
ISOC1	0.264762	0.0217031	0.906706	0.04794	0.843398
TMEM229B	-0.259305	0.0385379	0.999464	0.04799	0.843398
ANGPTL3	-0.173641	0.0464634	0.999464	0.04807	0.843398
C2orf80	-0.170384	0.0526099	0.999464	0.04807	0.843398
POLB	-0.184951	0.0759267	0.999464	0.04835	0.843398
BCL10	0.187548	0.0590822	0.999464	0.04839	0.843398
ITGB7	0.131966	0.113592	0.999464	0.04839	0.843398
TMEM237	0.136067	0.112872	0.999464	0.04844	0.843398
RTN4RL2	-0.216415	0.0351648	0.998393	0.04847	0.843398
AOX1	-0.152996	0.0911343	0.999464	0.04858	0.843398
HIPK1	0.177391	0.0536043	0.999464	0.04867	0.843398
FRMD4A	0.216383	0.0244955	0.92693	0.04892	0.843398
LGI4	-0.156431	0.0732612	0.999464	0.04896	0.843398
CABP2	0.187922	0.0472356	0.999464	0.04917	0.843398
GYS2	-0.172275	0.0465417	0.999464	0.04922	0.843398
MMP20	-0.175104	0.0438063	0.999464	0.04924	0.843398
GLRA4	0.201127	0.0459094	0.999464	0.04949	0.843398
COX6B1	-0.23093	0.0544307	0.999464	0.04962	0.843398
REEP6	-0.170021	0.0645133	0.999464	0.04966	0.843398
SEC14L1	-0.153699	0.0762157	0.999464	0.04966	0.843398
IPO11	-0.200476	0.0340567	0.998393	0.04973	0.843398
LBP	-0.147712	0.082687	0.999464	0.0498	0.843398
TNFAIP2	-0.150756	0.101722	0.999464	0.04988	0.843398
TM6SF1	0.160205	0.0779497	0.999464	0.05	0.843398
COCH	-0.125857	0.13986	0.999464	0.05002	0.843398
ARHGEF12	0.166114	0.041504	0.999464	0.0501	0.843398
SEPTIN12	0.159298	0.0784208	0.999464	0.05014	0.843398
FERMT2	0.239991	0.0602728	0.999464	0.05017	0.843398
METTL11B	0.184943	0.0397484	0.999464	0.05033	0.843398
BBX	-0.169835	0.0464308	0.999464	0.05042	0.843398
BDH1	-0.184998	0.04309	0.999464	0.05045	0.843398
CTRL	-0.173658	0.0567918	0.999464	0.05056	0.843398
SAC3D1	-0.121005	0.177111	0.999464	0.05059	0.843398
ACAA1	-0.171825	0.0675517	0.999464	0.05061	0.843398
LRRC42	-0.170178	0.0577754	0.999464	0.05066	0.843398
LRRC7	0.178568	0.0472241	0.999464	0.05067	0.843398
HMBS	0.15162	0.0954936	0.999464	0.05075	0.843398
DUOX1	0.145953	0.0864524	0.999464	0.05082	0.843398
ADAMTS19	0.158427	0.0685547	0.999464	0.05084	0.843398
TLNRD1	0.24563	0.0362023	0.999464	0.05088	0.843398
PNLIPRP1	-0.152642	0.0854134	0.999464	0.0509	0.843398
PCK2	-0.157885	0.0705971	0.999464	0.05096	0.843398
MRPS6	-0.18738	0.0430716	0.999464	0.05101	0.843398
EPB41L5	0.157104	0.0657364	0.999464	0.05101	0.843398
CHST3	0.150486	0.0912663	0.999464	0.05102	0.843398
PRPF18	0.247406	0.0545648	0.999464	0.05104	0.843398
BET1L	0.20477	0.0465278	0.999464	0.05111	0.843398
SMPD4	-0.158029	0.0671628	0.999464	0.05126	0.843398
MMP17	0.15577	0.0921077	0.999464	0.05129	0.843398
GRPR	-0.174659	0.0607641	0.999464	0.05134	0.843398
TNNI3	0.176661	0.0589361	0.999464	0.05135	0.843398
STEAP3	-0.139855	0.096914	0.999464	0.05159	0.843398
PROM1	-0.13211	0.107062	0.999464	0.05168	0.843398
KIF2A	-0.265502	0.0370137	0.999464	0.0517	0.843398
CCND1	0.187901	0.05988	0.999464	0.05172	0.843398
HAAO	-0.141637	0.110765	0.999464	0.05173	0.843398
RIPK1	0.153775	0.0696799	0.999464	0.05181	0.843398
KLKB1	-0.131587	0.122564	0.999464	0.05188	0.843398
TSPAN4	0.209244	0.0453087	0.999464	0.0519	0.843398
TLR2	-0.160222	0.0719552	0.999464	0.05196	0.843398
TRIM16L	-0.159442	0.074534	0.999464	0.05198	0.843398
BRINP1	-0.271597	0.0239799	0.92693	0.05206	0.843398
ST3GAL6	-0.135502	0.124261	0.999464	0.05207	0.843398
MTFR2	0.146622	0.0959901	0.999464	0.0521	0.843398
ADAMTS10	0.170413	0.0616531	0.999464	0.05219	0.843398
DDX59	-0.159652	0.0568272	0.999464	0.05222	0.843398
PNMT	0.139681	0.108815	0.999464	0.05222	0.843398
CCDC189	-0.126304	0.152166	0.999464	0.05226	0.843398
NAALADL1	-0.145106	0.100852	0.999464	0.05227	0.843398
TAF5	-0.175785	0.0602245	0.999464	0.0523	0.843398
MTSS1	0.187111	0.0407221	0.999464	0.05243	0.843398
KCNN3	0.18238	0.0665549	0.999464	0.05254	0.843398
SLC7A11	-0.167948	0.06225	0.999464	0.05263	0.843398
SYNE4	-0.159704	0.0706296	0.999464	0.05263	0.843398
PLEKHN1	-0.122804	0.145405	0.999464	0.05263	0.843398
NEU4	-0.108328	0.247068	0.999464	0.05268	0.843398
PSMG3	0.189477	0.05773	0.999464	0.05278	0.843398
BCO2	-0.165081	0.0647091	0.999464	0.05308	0.843398
PRRT2	-0.154452	0.075885	0.999464	0.05309	0.843398
SLC22A13	-0.153338	0.082757	0.999464	0.05315	0.843398
EPS8	-0.161375	0.0541709	0.999464	0.05316	0.843398
SHFL	0.196539	0.0477219	0.999464	0.05317	0.843398
ABCF1	0.157415	0.0703643	0.999464	0.05318	0.843398
SLC29A2	-0.161421	0.0634218	0.999464	0.0532	0.843398
PEF1	0.166573	0.070204	0.999464	0.05325	0.843398
ABCC5	0.163879	0.0565971	0.999464	0.05326	0.843398
SBK1	-0.223894	0.0258944	0.942646	0.05327	0.843398
AGMAT	-0.160998	0.0662026	0.999464	0.05327	0.843398
GPR35	-0.169129	0.0659489	0.999464	0.05328	0.843398
DDR1	0.162424	0.0703338	0.999464	0.05332	0.843398
DPH5	0.170317	0.0629113	0.999464	0.05343	0.843398
MLLT3	0.262989	0.0235857	0.92693	0.05344	0.843398
MYF6	0.251811	0.0293041	0.977876	0.05346	0.843398
DEFB129	-0.130646	0.149777	0.999464	0.05356	0.844012
PEMT	-0.153091	0.0896012	0.999464	0.05369	0.84459
ARHGAP12	-0.158195	0.0689665	0.999464	0.05375	0.84459
LYL1	0.175883	0.0612286	0.999464	0.05402	0.84459
MED4	0.222122	0.0448937	0.999464	0.05411	0.84459
GKN2	-0.171138	0.0616348	0.999464	0.05413	0.84459
PPA2	-0.148366	0.0895468	0.999464	0.05417	0.84459
ANAPC1	-0.169752	0.0507727	0.999464	0.05419	0.84459
MYDGF	-0.164817	0.091346	0.999464	0.05419	0.84459
B4GALT1	-0.16853	0.0624116	0.999464	0.05425	0.84459
PYCR2	-0.192073	0.050781	0.999464	0.05426	0.84459
VIL1	-0.15469	0.059607	0.999464	0.05429	0.84459
KLF15	-0.173762	0.0621213	0.999464	0.05433	0.84459
MRPS28	0.179463	0.0387395	0.999464	0.05448	0.84597
PGAM2	0.16792	0.0754337	0.999464	0.05459	0.846727
VEGFD	0.143094	0.0965318	0.999464	0.05469	0.847327
CCDC54	0.126159	0.14946	0.999464	0.05488	0.847688
PYGL	-0.164382	0.0549222	0.999464	0.05494	0.847688
PHF24	0.140515	0.105366	0.999464	0.05499	0.847688
TCERG1L	-0.14257	0.105637	0.999464	0.05499	0.847688
MIOX	-0.16599	0.0611308	0.999464	0.05502	0.847688
NR2C1	0.14776	0.10728	0.999464	0.05519	0.84936
RNF212	-0.142201	0.138362	0.999464	0.05532	0.850237
B3GAT1	-0.225334	0.033743	0.998393	0.05537	0.850237
GRAMD1C	-0.138823	0.101886	0.999464	0.05547	0.850827
PARP16	0.185286	0.0454995	0.999464	0.05577	0.85384
PNMA8A	-0.168021	0.0610687	0.999464	0.05579	0.85384
ZSCAN25	-0.155919	0.0800377	0.999464	0.05591	0.85473
MTTP	-0.12016	0.145756	0.999464	0.05598	0.854854
DEPDC5	-0.165894	0.0623241	0.999464	0.05618	0.856536
WIPI2	0.184848	0.0566391	0.999464	0.05632	0.856536
IFT74	0.159579	0.0708518	0.999464	0.05634	0.856536
ECI2	-0.164343	0.0606908	0.999464	0.0564	0.856536
CHRDL2	-0.149313	0.083912	0.999464	0.0564	0.856536
SLC26A2	-0.151072	0.0668289	0.999464	0.05681	0.859073
KYAT3	-0.144037	0.0994101	0.999464	0.05682	0.859073
PLEKHA1	0.169453	0.0665908	0.999464	0.05683	0.859073
DPYSL5	0.208632	0.0553457	0.999464	0.05691	0.859073
PHACTR4	-0.143064	0.0860429	0.999464	0.05694	0.859073
SMCO1	0.138505	0.118958	0.999464	0.05694	0.859073
TMX2	-0.170419	0.0605574	0.999464	0.05714	0.860479
GGT1	-0.151708	0.0813046	0.999464	0.05717	0.860479
ZDHHC13	-0.14082	0.0957988	0.999464	0.05722	0.860479
HNF1A	0.1125	0.209765	0.999464	0.05743	0.861876
ZNF182	-0.164016	0.072234	0.999464	0.05749	0.861876
DHX57	0.151478	0.0699291	0.999464	0.0575	0.861876
DIPK1A	-0.217416	0.0512091	0.999464	0.0577	0.863301
FAM151B	-0.181207	0.0515736	0.999464	0.05772	0.863301
KLC3	0.142005	0.12836	0.999464	0.05784	0.863675
PON3	-0.153779	0.0749539	0.999464	0.05787	0.863675
SYNGR1	-0.195595	0.0602542	0.999464	0.05813	0.864338
DNAJA3	0.169381	0.0512874	0.999464	0.05823	0.864338
MGA	-0.124873	0.130484	0.999464	0.05824	0.864338
GSK3B	-0.205309	0.0522297	0.999464	0.05845	0.864338
PTPN2	-0.152657	0.103367	0.999464	0.05848	0.864338
PTGR1	-0.153824	0.0842286	0.999464	0.05855	0.864338
MORN1	-0.144739	0.121098	0.999464	0.05863	0.864338
MPZ	-0.189638	0.0472267	0.999464	0.05866	0.864338
UNG	-0.178719	0.0582292	0.999464	0.05876	0.864338
DIPK1B	-0.174259	0.0613673	0.999464	0.05884	0.864338
FMO1	-0.201525	0.0236457	0.92693	0.0589	0.864338
ADORA2A	-0.177756	0.0584779	0.999464	0.05891	0.864338
SEPTIN2	0.175915	0.0991471	0.999464	0.05891	0.864338
FOXD2	-0.210693	0.0404174	0.999464	0.05901	0.864338
NUP153	0.13944	0.0909803	0.999464	0.05902	0.864338
PRSS8	-0.137033	0.106422	0.999464	0.05911	0.864338
NPM2	0.147556	0.0991806	0.999464	0.05916	0.864338
RNF121	-0.210335	0.0875551	0.999464	0.05917	0.864338
MTHFD2	-0.164468	0.0859861	0.999464	0.05938	0.864338
ING3	0.233296	0.057436	0.999464	0.05946	0.864338
FAIM	0.19967	0.0364969	0.999464	0.05961	0.864338
HOXA1	0.16616	0.0856755	0.999464	0.05968	0.864338
JUN	0.238332	0.0558939	0.999464	0.05972	0.864338
P2RY1	0.177248	0.0627375	0.999464	0.05972	0.864338
SLX1B	-0.148715	0.105002	0.999464	0.05975	0.864338
SPOCK2	0.157762	0.0788955	0.999464	0.05997	0.864338
MCCC2	-0.128865	0.136337	0.999464	0.06011	0.864338
CKMT2	0.179848	0.0625325	0.999464	0.06014	0.864338
MAPK13	0.159628	0.0957606	0.999464	0.06015	0.864338
ZCCHC7	-0.126434	0.127015	0.999464	0.0602	0.864338
RNF186	-0.131788	0.12904	0.999464	0.06022	0.864338
HPRT1	-0.221213	0.0866604	0.999464	0.06029	0.864338
MRPS5	-0.148568	0.0968573	0.999464	0.0603	0.864338
CEP295	0.139491	0.100232	0.999464	0.06042	0.864338
ITGAL	-0.131561	0.118603	0.999464	0.06046	0.864338
ANO4	0.180135	0.0489808	0.999464	0.06052	0.864338
GUCA2A	-0.141577	0.106739	0.999464	0.06053	0.864338
LPGAT1	-0.144182	0.0952369	0.999464	0.06054	0.864338
ABCG1	-0.216314	0.0245422	0.92693	0.06056	0.864338
SCAMP1	-0.243569	0.0437207	0.999464	0.06056	0.864338
FAR2	-0.169569	0.0519231	0.999464	0.06059	0.864338
BMPER	-0.165847	0.0545571	0.999464	0.06059	0.864338
CDH8	0.206258	0.037539	0.999464	0.06079	0.864338
RPL36A	0.197122	0.0505051	0.999464	0.06081	0.864338
CPS1	-0.150503	0.0697941	0.999464	0.06084	0.864338
GPC3	-0.167467	0.0619385	0.999464	0.06087	0.864338
UTP6	-0.178286	0.0350729	0.998393	0.06094	0.864338
IQGAP1	0.166491	0.0624267	0.999464	0.06096	0.864338
GBA2	-0.118186	0.153954	0.999464	0.06099	0.864338
TAS1R2	-0.145611	0.106605	0.999464	0.06119	0.864338
PLCH2	-0.152245	0.0914085	0.999464	0.06135	0.864338
ZPLD1	-0.152379	0.099502	0.999464	0.06135	0.864338
SMAD7	0.227019	0.0428582	0.999464	0.06139	0.864338
CCDC58	-0.222126	0.0665944	0.999464	0.06156	0.864338
CERS6	0.193126	0.0473128	0.999464	0.06157	0.864338
SLC13A4	0.174958	0.0386824	0.999464	0.06158	0.864338
IFITM10	0.208052	0.050409	0.999464	0.0616	0.864338
PADI1	-0.133498	0.111945	0.999464	0.06162	0.864338
DHX16	0.189339	0.0367329	0.999464	0.06169	0.864338
COL11A2	0.165622	0.0496785	0.999464	0.06173	0.864338
FBXW7	-0.201002	0.0483619	0.999464	0.0619	0.864338
PTGER1	-0.172608	0.0562455	0.999464	0.06194	0.864338
SCG3	-0.16732	0.0570735	0.999464	0.06204	0.864338
HMG20A	0.216886	0.031059	0.980579	0.06207	0.864338
TECTB	-0.154166	0.092725	0.999464	0.06212	0.864338
AAK1	0.139552	0.0976455	0.999464	0.06216	0.864338
TPPP2	0.15481	0.092742	0.999464	0.06231	0.864338
SLC12A3	-0.148492	0.0833184	0.999464	0.06232	0.864338
MC5R	-0.17517	0.0588858	0.999464	0.06237	0.864338
PALMD	0.16991	0.041036	0.999464	0.0624	0.864338
P2RX6	0.137113	0.147568	0.999464	0.06242	0.864338
TADA1	0.218105	0.0462534	0.999464	0.06243	0.864338
ZNF341	-0.178331	0.0493865	0.999464	0.06248	0.864338
FAM3C	-0.235	0.0519302	0.999464	0.06263	0.864784
LETM2	-0.142106	0.112443	0.999464	0.06264	0.864784
AP5S1	0.165262	0.0874068	0.999464	0.0627	0.864784
ABCA5	-0.156369	0.0612608	0.999464	0.06286	0.864815
PI4KA	-0.159407	0.0647843	0.999464	0.06289	0.864815
TRAF3IP3	0.148136	0.0774534	0.999464	0.06289	0.864815
CYP7A1	-0.137459	0.0992026	0.999464	0.06297	0.865055
SYNGAP1	-0.235985	0.0388125	0.999464	0.06325	0.868038
ID1	0.197004	0.0707395	0.999464	0.06338	0.868218
SMAD9	0.180852	0.0648548	0.999464	0.06343	0.868218
RGS13	-0.148526	0.101104	0.999464	0.06348	0.868218
PRDX2	-0.199664	0.0669441	0.999464	0.06352	0.868218
FBXO43	0.149883	0.0750198	0.999464	0.06364	0.868218
BORCS6	0.167557	0.0760777	0.999464	0.06364	0.868218
TMEM43	-0.16599	0.0749482	0.999464	0.06381	0.869287
SMIM40	0.183186	0.0640035	0.999464	0.06394	0.869287
HSPB1	0.171104	0.102935	0.999464	0.06396	0.869287
SYT9	0.17741	0.073006	0.999464	0.06397	0.869287
DHRS9	-0.146684	0.102608	0.999464	0.06406	0.869655
LPCAT4	0.149862	0.0851218	0.999464	0.06422	0.870972
AGRN	-0.117083	0.169862	0.999464	0.06431	0.871337
SEC23B	-0.183139	0.0532609	0.999464	0.06446	0.872514
SLC4A5	0.143746	0.102762	0.999464	0.06461	0.873689
GAL	0.162476	0.102772	0.999464	0.06477	0.874151
USO1	0.159602	0.0665012	0.999464	0.06479	0.874151
FBXO44	-0.187032	0.0651727	0.999464	0.065	0.874151
LTN1	0.169658	0.0466633	0.999464	0.06504	0.874151
RPL9	0.194414	0.0437815	0.999464	0.06507	0.874151
TMEM30B	-0.173241	0.0533504	0.999464	0.06512	0.874151
HPN	-0.161237	0.0760281	0.999464	0.06512	0.874151
MECR	-0.115024	0.172858	0.999464	0.06522	0.874151
GGTLC1	-0.176672	0.05892	0.999464	0.06524	0.874151
CLEC1A	0.133214	0.129302	0.999464	0.06534	0.874151
MUC4	-0.130586	0.137101	0.999464	0.06534	0.874151
TBC1D24	-0.151135	0.0873223	0.999464	0.06549	0.875311
TTC21A	0.146496	0.0776593	0.999464	0.06567	0.875621
NSMCE3	-0.160186	0.109562	0.999464	0.06568	0.875621
EXOC5	0.22404	0.04174	0.999464	0.06575	0.875621
ASPG	-0.146208	0.0882299	0.999464	0.06579	0.875621
PON1	-0.148333	0.108926	0.999464	0.06583	0.875621
IFT172	0.159557	0.073159	0.999464	0.06592	0.875975
GLDC	-0.134326	0.121769	0.999464	0.06604	0.87621
NELL1	0.1285	0.140465	0.999464	0.06609	0.87621
DHRS1	-0.148503	0.0956645	0.999464	0.06637	0.87621
CROCC2	-0.143371	0.102325	0.999464	0.06638	0.87621
PCDHAC2	-0.133398	0.12877	0.999464	0.06641	0.87621
RECQL4	-0.109276	0.181664	0.999464	0.06653	0.87621
FAM162A	-0.127651	0.138613	0.999464	0.06663	0.87621
KCND3	0.208289	0.0654658	0.999464	0.06678	0.87621
PEPD	-0.140117	0.109062	0.999464	0.06695	0.87621
UTP3	0.175246	0.0469845	0.999464	0.06696	0.87621
TRPV6	-0.153378	0.0838995	0.999464	0.06717	0.87621
PLRG1	-0.194352	0.0538995	0.999464	0.06741	0.87621
PDGFA	0.18495	0.0576957	0.999464	0.06755	0.87621
ARHGAP11A	-0.133696	0.110144	0.999464	0.0676	0.87621
NGDN	0.162537	0.0636187	0.999464	0.06761	0.87621
XRCC1	-0.130395	0.140781	0.999464	0.06765	0.87621
C3orf80	-0.197623	0.0575908	0.999464	0.06771	0.87621
UBAC1	-0.148655	0.117753	0.999464	0.06772	0.87621
BMP3	0.126558	0.133401	0.999464	0.06775	0.87621
SLC35B4	0.163977	0.0735172	0.999464	0.06782	0.87621
CCDC126	-0.231523	0.0537964	0.999464	0.06786	0.87621
IL1RN	-0.158528	0.0837445	0.999464	0.06789	0.87621
GGT7	0.166719	0.0789319	0.999464	0.0679	0.87621
CASP9	-0.147434	0.0757556	0.999464	0.06797	0.87621
SUSD6	0.160675	0.078316	0.999464	0.06803	0.87621
CPVL	-0.129678	0.124016	0.999464	0.06803	0.87621
DPM1	-0.165992	0.0749444	0.999464	0.06806	0.87621
KDF1	-0.152662	0.0853719	0.999464	0.06813	0.87621
KCNJ5	0.176462	0.0518589	0.999464	0.06819	0.87621
SLC6A2	-0.122682	0.161094	0.999464	0.06825	0.87621
GGT2	-0.142681	0.104005	0.999464	0.06832	0.87621
STARD10	-0.251384	0.0433871	0.999464	0.06846	0.87621
CNKSR3	0.145439	0.100064	0.999464	0.06846	0.87621
MBOAT2	-0.138471	0.11058	0.999464	0.06847	0.87621
CD3D	-0.132072	0.12255	0.999464	0.06855	0.87621
PPA1	-0.156794	0.105119	0.999464	0.06859	0.87621
ZDHHC7	-0.177803	0.0899516	0.999464	0.06862	0.87621
RASL11B	0.177566	0.071342	0.999464	0.06868	0.87621
SSMEM1	-0.144274	0.0937845	0.999464	0.0687	0.87621
SLC27A6	-0.152796	0.0850956	0.999464	0.06879	0.87621
WNK4	-0.128467	0.124899	0.999464	0.06884	0.87621
SLC12A2	0.13626	0.125117	0.999464	0.06884	0.87621
NPR2	-0.187584	0.0553395	0.999464	0.06894	0.87621
IRF8	0.163507	0.0743571	0.999464	0.06917	0.87621
CLDN20	0.157359	0.0673125	0.999464	0.06919	0.87621
CLEC11A	0.129996	0.15354	0.999464	0.06919	0.87621
CREBL2	0.256187	0.0410185	0.999464	0.06923	0.87621
STAT4	0.156769	0.0886358	0.999464	0.06926	0.87621
THSD4	0.142918	0.0957048	0.999464	0.06928	0.87621
RIN2	0.140053	0.105204	0.999464	0.06933	0.87621
SULT1A4	-0.123882	0.152281	0.999464	0.06941	0.87621
EEPD1	0.170958	0.0689685	0.999464	0.06955	0.87621
RBIS	0.187746	0.0715243	0.999464	0.06962	0.87621
ACO2	-0.143055	0.101763	0.999464	0.06963	0.87621
LPO	-0.131609	0.123879	0.999464	0.06971	0.87621
ZHX1	0.168696	0.0496163	0.999464	0.06992	0.87621
MMRN2	0.178014	0.0488522	0.999464	0.07001	0.87621
SLC27A4	-0.139918	0.100424	0.999464	0.07004	0.87621
PLCD4	-0.142122	0.0939239	0.999464	0.07007	0.87621
STAC	0.186238	0.0425649	0.999464	0.0701	0.87621
FGG	-0.121568	0.143821	0.999464	0.07012	0.87621
HMGB3	0.255682	0.0486381	0.999464	0.07024	0.87621
C8orf88	0.247648	0.0433286	0.999464	0.07038	0.87621
MYEF2	-0.162908	0.0861258	0.999464	0.07044	0.87621
LMNB2	0.156703	0.0809511	0.999464	0.07046	0.87621
EVI5L	0.199979	0.071651	0.999464	0.07063	0.87621
PAQR7	-0.172813	0.0569784	0.999464	0.07067	0.87621
KRTDAP	0.159962	0.103098	0.999464	0.07074	0.87621
GPR146	-0.126876	0.155192	0.999464	0.07084	0.87621
ASAP3	-0.121145	0.146639	0.999464	0.07105	0.87621
FCHSD2	-0.162602	0.0772557	0.999464	0.07109	0.87621
OR52W1	-0.163904	0.0748847	0.999464	0.07114	0.87621
IER5	-0.131575	0.159164	0.999464	0.07115	0.87621
NECTIN1	0.181253	0.0475703	0.999464	0.07134	0.87621
ZMYM2	-0.16613	0.0506345	0.999464	0.07135	0.87621
GLIPR1L2	0.133918	0.139751	0.999464	0.07144	0.87621
PSMD10	-0.204296	0.0808164	0.999464	0.07153	0.87621
DGAT2L6	-0.165909	0.0612587	0.999464	0.07155	0.87621
LONP2	-0.162005	0.0823085	0.999464	0.07181	0.87621
THAP12	0.19738	0.0622202	0.999464	0.07185	0.87621
MKS1	0.128409	0.140747	0.999464	0.07193	0.87621
CDK20	0.217352	0.034361	0.998393	0.07194	0.87621
SLX1A	-0.13829	0.12875	0.999464	0.07206	0.87621
SNX14	0.175831	0.0624815	0.999464	0.07216	0.87621
EZH1	0.184861	0.0828639	0.999464	0.07223	0.87621
ZC3H11A	0.15741	0.0652059	0.999464	0.07232	0.87621
LARS1	-0.142658	0.085848	0.999464	0.07235	0.87621
ABHD5	-0.161235	0.07727	0.999464	0.07236	0.87621
MND1	-0.192599	0.0629166	0.999464	0.0724	0.87621
MTR	-0.126175	0.135995	0.999464	0.07257	0.87621
NAA10	0.212005	0.0624071	0.999464	0.07258	0.87621
SLC45A4	-0.146616	0.0885208	0.999464	0.0726	0.87621
PHC3	0.166061	0.0610179	0.999464	0.07266	0.87621
NSUN3	0.161332	0.0645945	0.999464	0.07271	0.87621
TESK1	0.14846	0.0998533	0.999464	0.07286	0.87621
PTPRQ	-0.123719	0.131459	0.999464	0.07291	0.87621
C12orf43	0.104146	0.249685	0.999464	0.07297	0.87621
BCL2L13	0.160898	0.0663729	0.999464	0.07302	0.87621
GRIP1	0.185275	0.0314485	0.982323	0.07305	0.87621
NR2E3	0.145195	0.097988	0.999464	0.07306	0.87621
LIPA	-0.149715	0.0891071	0.999464	0.07318	0.87621
MMP2	0.16861	0.0581001	0.999464	0.07327	0.87621
SULT1A3	-0.12189	0.160619	0.999464	0.07329	0.87621
PADI2	-0.153459	0.0778111	0.999464	0.0735	0.87621
EHBP1	-0.128668	0.135469	0.999464	0.07361	0.87621
HAND1	0.206051	0.0616435	0.999464	0.07368	0.87621
RANBP6	0.148216	0.112324	0.999464	0.07372	0.87621
ALG1L2	0.143244	0.113971	0.999464	0.07376	0.87621
BHMT2	-0.144072	0.122841	0.999464	0.07378	0.87621
SH3RF1	0.182472	0.029745	0.977876	0.07383	0.87621
C8orf34	0.144428	0.10247	0.999464	0.07398	0.87621
TLN1	0.144426	0.109517	0.999464	0.07411	0.87621
ADAT3	0.13263	0.155818	0.999464	0.07413	0.87621
OR13C3	-0.148559	0.108383	0.999464	0.07418	0.87621
CETN3	0.191313	0.0831751	0.999464	0.07431	0.87621
GFI1	-0.168849	0.0700022	0.999464	0.0744	0.87621
VTN	-0.117244	0.161664	0.999464	0.07445	0.87621
REC114	0.147942	0.0822053	0.999464	0.0745	0.87621
C1S	-0.132882	0.114916	0.999464	0.07452	0.87621
AGRP	-0.138644	0.13265	0.999464	0.07474	0.87621
PODN	-0.129223	0.130902	0.999464	0.07477	0.87621
NTRK2	-0.169121	0.069545	0.999464	0.07483	0.87621
GOLM1	-0.15081	0.0808176	0.999464	0.07487	0.87621
M6PR	0.1525	0.0882446	0.999464	0.07489	0.87621
PITPNC1	0.210378	0.0429619	0.999464	0.07496	0.87621
RNF167	0.136613	0.131883	0.999464	0.07498	0.87621
TMED9	-0.158485	0.108081	0.999464	0.075	0.87621
PAFAH2	-0.127933	0.134823	0.999464	0.07502	0.87621
TRIM55	-0.153725	0.080776	0.999464	0.07504	0.87621
ACTL7B	0.173476	0.0560185	0.999464	0.07506	0.87621
SATB1	0.19481	0.0533255	0.999464	0.07508	0.87621
PLG	-0.112597	0.171565	0.999464	0.07529	0.87621
MINAR1	0.175799	0.0398933	0.999464	0.07532	0.87621
PDGFD	0.166841	0.0662484	0.999464	0.07541	0.87621
RIOK2	0.146244	0.0930173	0.999464	0.07542	0.87621
FBXW5	0.149265	0.10519	0.999464	0.07549	0.87621
GDF9	-0.133834	0.118959	0.999464	0.0755	0.87621
CAPNS2	-0.160319	0.0869814	0.999464	0.07553	0.87621
KCTD11	-0.149861	0.111508	0.999464	0.07553	0.87621
SLC16A9	-0.161321	0.0688855	0.999464	0.07558	0.87621
MELK	0.137439	0.111925	0.999464	0.07562	0.87621
CDK14	-0.187518	0.0819962	0.999464	0.07563	0.87621
BCL9	0.165477	0.0619455	0.999464	0.07577	0.87621
BBOX1	-0.142758	0.101165	0.999464	0.07584	0.87621
C1orf198	-0.17256	0.0616826	0.999464	0.07585	0.87621
ISM1	-0.150982	0.0876473	0.999464	0.07599	0.87621
ATP11B	-0.158344	0.0708598	0.999464	0.07612	0.87621
TCEANC2	-0.138259	0.118159	0.999464	0.07615	0.87621
LIN37	-0.169551	0.090066	0.999464	0.07624	0.87621
SLC5A9	-0.136275	0.120653	0.999464	0.07626	0.87621
ADAMTS7	0.169248	0.0681185	0.999464	0.07628	0.87621
SPATA5L1	-0.127147	0.141685	0.999464	0.07634	0.87621
SERPINB10	-0.132551	0.114534	0.999464	0.07636	0.87621
DEDD	0.153295	0.100407	0.999464	0.07637	0.87621
TMEM267	0.142262	0.118024	0.999464	0.07637	0.87621
PRXL2A	-0.166554	0.0739508	0.999464	0.0764	0.87621
CLDN18	-0.167962	0.0715069	0.999464	0.07643	0.87621
NOTCH2	0.140446	0.0908716	0.999464	0.07649	0.87621
TIFA	-0.148154	0.10056	0.999464	0.0765	0.87621
TMEM18	-0.170959	0.0768886	0.999464	0.07654	0.87621
KCNK16	-0.148263	0.0975534	0.999464	0.0766	0.87621
SLC38A4	-0.168102	0.0471078	0.999464	0.07663	0.87621
CAT	-0.142023	0.091796	0.999464	0.07666	0.87621
UGDH	-0.196938	0.0675058	0.999464	0.07669	0.87621
LRRC59	0.176625	0.0526268	0.999464	0.07681	0.87621
SRGAP1	0.182375	0.053191	0.999464	0.07685	0.87621
IL12A	0.127596	0.137315	0.999464	0.07689	0.87621
C14orf119	0.188839	0.0525444	0.999464	0.07698	0.87621
SKAP2	-0.143019	0.104532	0.999464	0.07703	0.87621
PLS1	-0.146965	0.104782	0.999464	0.07707	0.87621
WBP1	-0.14347	0.104794	0.999464	0.07708	0.87621
CAVIN4	0.122857	0.162118	0.999464	0.07709	0.87621
CADM1	0.2027	0.0612429	0.999464	0.0771	0.87621
SDHAF2	0.162212	0.0792671	0.999464	0.07711	0.87621
SDF2L1	-0.160235	0.0830453	0.999464	0.07719	0.87621
MGAT2	-0.179214	0.0598323	0.999464	0.07721	0.87621
SARNP	0.181896	0.0826809	0.999464	0.07722	0.87621
NDUFA4L2	-0.234154	0.0604671	0.999464	0.07727	0.87621
VPS13B	0.134725	0.0990854	0.999464	0.07733	0.87621
TM4SF20	-0.128839	0.134947	0.999464	0.07735	0.87621
CLCN2	-0.142503	0.107178	0.999464	0.07744	0.876246
CLK4	0.17662	0.0728871	0.999464	0.07748	0.876246
SUOX	-0.125729	0.135983	0.999464	0.07758	0.87666
GLG1	-0.125693	0.160794	0.999464	0.07767	0.87696
BTAF1	-0.163525	0.0651309	0.999464	0.07782	0.877936
FKBP5	0.157181	0.0979061	0.999464	0.07803	0.879484
SPAST	-0.175228	0.0646081	0.999464	0.07825	0.879484
PYROXD2	-0.124498	0.138477	0.999464	0.07831	0.879484
ZP3	-0.129203	0.138287	0.999464	0.07837	0.879484
UACA	0.160924	0.0539999	0.999464	0.07855	0.879484
PPP1R14C	-0.199181	0.0643786	0.999464	0.07864	0.879484
CDPF1	0.169159	0.071986	0.999464	0.07864	0.879484
BNIPL	0.138656	0.114239	0.999464	0.07878	0.879484
COPB2	0.18884	0.0612127	0.999464	0.07882	0.879484
CXCR5	0.141278	0.11168	0.999464	0.07884	0.879484
LRRC34	-0.107032	0.196937	0.999464	0.07889	0.879484
FNDC7	0.125625	0.133534	0.999464	0.07898	0.879484
GJB2	0.192329	0.0778266	0.999464	0.079	0.879484
ANKZF1	-0.107288	0.197416	0.999464	0.07903	0.879484
FOXO1	0.170439	0.0544203	0.999464	0.07909	0.879484
OXCT1	-0.138769	0.121223	0.999464	0.07913	0.879484
HTR3B	0.120088	0.166938	0.999464	0.07914	0.879484
PAPSS2	-0.157037	0.0755217	0.999464	0.07916	0.879484
NPC1L1	-0.115851	0.191071	0.999464	0.07919	0.879484
ALKBH5	-0.226127	0.0771843	0.999464	0.07923	0.879484
PTOV1	-0.213792	0.0693443	0.999464	0.07939	0.880319
RASSF9	0.143158	0.0951421	0.999464	0.07952	0.880319
ADSS2	-0.212983	0.0438545	0.999464	0.07955	0.880319
CRB3	-0.127256	0.162471	0.999464	0.07956	0.880319
MYOZ2	-0.151883	0.0963066	0.999464	0.07963	0.880348
RHAG	-0.131692	0.120904	0.999464	0.07969	0.880348
HSPH1	0.158746	0.0782372	0.999464	0.07976	0.880417
PBX3	-0.217909	0.078805	0.999464	0.07986	0.880818
PRR15L	-0.177417	0.0774118	0.999464	0.08007	0.88243
CLDN23	-0.146885	0.117239	0.999464	0.08028	0.884039
HSPB2	0.207574	0.0566213	0.999464	0.08056	0.885306
LRRC19	-0.133488	0.122714	0.999464	0.08058	0.885306
ZNF32	-0.24073	0.0573638	0.999464	0.0806	0.885306
TMEM161B	-0.143015	0.139794	0.999464	0.08067	0.885306
C3orf52	-0.135163	0.12229	0.999464	0.08077	0.885306
ENTPD5	-0.148512	0.0943209	0.999464	0.08083	0.885306
HEATR6	-0.115719	0.183034	0.999464	0.08105	0.885306
CHRM1	0.201879	0.076318	0.999464	0.08106	0.885306
ABCG8	-0.147071	0.0807106	0.999464	0.08114	0.885306
PKP1	-0.121019	0.158926	0.999464	0.08121	0.885306
MERTK	-0.154341	0.0628796	0.999464	0.08125	0.885306
SLC27A2	-0.123114	0.141538	0.999464	0.08128	0.885306
LEFTY2	0.156213	0.0969704	0.999464	0.08134	0.885306
GSTK1	-0.105977	0.226504	0.999464	0.08135	0.885306
NIPBL	-0.128373	0.125176	0.999464	0.08137	0.885306
RAPH1	0.151829	0.0964256	0.999464	0.08142	0.885306
OR6Y1	-0.18951	0.0528381	0.999464	0.08166	0.887218
AGFG2	-0.138738	0.0984305	0.999464	0.08195	0.888565
GSX2	0.169206	0.0844276	0.999464	0.08199	0.888565
ISX	-0.134506	0.14472	0.999464	0.08223	0.888565
BMPR1A	0.205113	0.0566753	0.999464	0.08225	0.888565
ECHDC2	-0.145034	0.105155	0.999464	0.08227	0.888565
PTRH1	0.164934	0.0768451	0.999464	0.08231	0.888565
NPPA	0.154186	0.0834915	0.999464	0.08246	0.888565
DSN1	-0.127127	0.130275	0.999464	0.08252	0.888565
SIRT5	-0.12837	0.130651	0.999464	0.08253	0.888565
CCDC68	-0.119666	0.153114	0.999464	0.08265	0.888565
RANBP1	-0.155059	0.116019	0.999464	0.08266	0.888565
SLCO1A2	-0.154646	0.0789528	0.999464	0.08268	0.888565
RELL2	-0.153238	0.0805658	0.999464	0.08269	0.888565
BACE2	-0.156613	0.0786879	0.999464	0.08274	0.888565
GFPT1	-0.233537	0.0467572	0.999464	0.08275	0.888565
CCDC153	0.148657	0.119439	0.999464	0.08303	0.888565
DOCK11	-0.116914	0.161379	0.999464	0.08312	0.888565
LTBR	0.114642	0.169737	0.999464	0.08312	0.888565
GDPD1	-0.186405	0.0660945	0.999464	0.08328	0.888565
TRAM1	-0.187758	0.0587928	0.999464	0.0833	0.888565
LNPEP	0.126379	0.123304	0.999464	0.08335	0.888565
ADGRF1	-0.13416	0.105222	0.999464	0.08338	0.888565
NSF	0.21282	0.0596914	0.999464	0.08342	0.888565
SLC5A11	-0.152594	0.0830602	0.999464	0.08349	0.888565
PIP5K1B	-0.163904	0.0814159	0.999464	0.08351	0.888565
DCAKD	-0.179894	0.0624635	0.999464	0.08352	0.888565
PABPC4	0.212699	0.0632811	0.999464	0.08352	0.888565
ACP4	0.174017	0.0628912	0.999464	0.08367	0.889476
SYT5	0.156308	0.111314	0.999464	0.08381	0.890111
PKD1L2	0.115819	0.207779	0.999464	0.08389	0.890111
MAP2	0.124812	0.132006	0.999464	0.08403	0.890111
SWAP70	0.161347	0.0783187	0.999464	0.08414	0.890111
CABP5	0.222483	0.0622029	0.999464	0.08419	0.890111
PCYOX1	-0.122493	0.147887	0.999464	0.0842	0.890111
USF2	0.110732	0.25847	0.999464	0.08427	0.890111
KYAT1	-0.106902	0.210364	0.999464	0.08431	0.890111
MXI1	-0.18699	0.0967437	0.999464	0.08444	0.890111
FAM81A	0.16953	0.0951503	0.999464	0.08451	0.890111
NOMO3	0.124982	0.153325	0.999464	0.08456	0.890111
MRPS36	-0.176584	0.11028	0.999464	0.0846	0.890111
FCRL1	-0.118711	0.171894	0.999464	0.08464	0.890111
ZCCHC10	0.220117	0.057749	0.999464	0.0847	0.890111
KCNC2	0.165105	0.0907727	0.999464	0.08485	0.890111
IFFO2	-0.18154	0.085036	0.999464	0.08489	0.890111
SHMT2	-0.140742	0.11306	0.999464	0.08503	0.890111
FTSJ3	0.128507	0.118312	0.999464	0.0852	0.890111
ZNF592	0.15439	0.0794569	0.999464	0.0853	0.890111
CLCN6	-0.138061	0.113019	0.999464	0.0853	0.890111
MANEAL	0.174554	0.121477	0.999464	0.0853	0.890111
SHC4	-0.138954	0.0991064	0.999464	0.08531	0.890111
CCDC172	0.127847	0.142509	0.999464	0.08537	0.890111
COQ10A	-0.160352	0.0912352	0.999464	0.08544	0.890111
GALNT1	0.208272	0.0749613	0.999464	0.08557	0.890111
SLC27A5	-0.113233	0.196101	0.999464	0.08564	0.890111
TNFRSF8	-0.0932565	0.282011	0.999464	0.08569	0.890111
NIPSNAP1	-0.168449	0.0843333	0.999464	0.08575	0.890111
RASSF8	0.199908	0.0520977	0.999464	0.08577	0.890111
ATP5F1D	-0.157203	0.116419	0.999464	0.08588	0.890111
NKAPL	0.174457	0.0696279	0.999464	0.08591	0.890111
POU2F2	0.193734	0.0738895	0.999464	0.08619	0.890111
MS4A2	-0.113478	0.198614	0.999464	0.08624	0.890111
KRT28	-0.157684	0.0667415	0.999464	0.08636	0.890111
PRR3	0.16983	0.0761031	0.999464	0.08649	0.890111
CUL4A	-0.158184	0.110518	0.999464	0.08653	0.890111
EIPR1	-0.170692	0.0719557	0.999464	0.08663	0.890111
RYK	-0.162107	0.0968734	0.999464	0.08682	0.890111
SIPA1L1	0.157383	0.0652535	0.999464	0.0869	0.890111
INKA2	0.146743	0.101076	0.999464	0.08691	0.890111
ANP32E	0.1814	0.0907568	0.999464	0.08692	0.890111
PDZD2	0.141486	0.0991105	0.999464	0.08692	0.890111
MFSD2B	-0.136472	0.111794	0.999464	0.08699	0.890111
HTR1F	0.153133	0.1119	0.999464	0.087	0.890111
GCFC2	-0.130964	0.12436	0.999464	0.08701	0.890111
PPP1R2	-0.163904	0.0931783	0.999464	0.08703	0.890111
SCARB2	0.130937	0.131553	0.999464	0.08717	0.890111
ANK1	-0.152546	0.0623792	0.999464	0.08729	0.890111
DUSP16	0.146825	0.0868806	0.999464	0.08738	0.890111
HELT	0.138089	0.129314	0.999464	0.08747	0.890111
GOLT1A	-0.153418	0.118167	0.999464	0.0875	0.890111
ADAP1	-0.159617	0.112673	0.999464	0.08752	0.890111
FNDC3B	0.147863	0.0812543	0.999464	0.08756	0.890111
C17orf67	-0.1824	0.0588409	0.999464	0.08774	0.890111
PRR14	-0.133863	0.11353	0.999464	0.08775	0.890111
GATA5	0.111483	0.223457	0.999464	0.08777	0.890111
EXOSC7	-0.176761	0.0900874	0.999464	0.08784	0.890111
SYT1	0.204045	0.0855757	0.999464	0.08787	0.890111
WT1	-0.163307	0.0928159	0.999464	0.08788	0.890111
COMP	-0.145634	0.106547	0.999464	0.08788	0.890111
NELFE	0.148432	0.116645	0.999464	0.08788	0.890111
AP2M1	0.182365	0.117357	0.999464	0.08788	0.890111
MLX	0.1514	0.111049	0.999464	0.08795	0.890111
FAM229A	0.182452	0.0834548	0.999464	0.08799	0.890111
ANO1	-0.136419	0.118823	0.999464	0.08806	0.890111
FADS3	-0.142767	0.103796	0.999464	0.0881	0.890111
PATE3	-0.140563	0.132324	0.999464	0.08817	0.890111
LAMP2	-0.135222	0.115146	0.999464	0.08834	0.890111
SLC43A2	-0.13059	0.137088	0.999464	0.08836	0.890111
C11orf87	0.152098	0.098676	0.999464	0.08839	0.890111
BOLA1	0.148522	0.132406	0.999464	0.08839	0.890111
SH3BP5L	0.162119	0.101822	0.999464	0.0884	0.890111
GMNN	0.134804	0.126228	0.999464	0.08858	0.890111
TMPRSS2	-0.163101	0.0577974	0.999464	0.08859	0.890111
INPP5K	-0.131109	0.122573	0.999464	0.08867	0.890111
CPNE3	-0.1668	0.069817	0.999464	0.08876	0.890111
BLOC1S2	0.197522	0.0939247	0.999464	0.08891	0.890111
DNAJC13	0.159187	0.0661808	0.999464	0.08906	0.890111
NME4	-0.164594	0.0828818	0.999464	0.0891	0.890111
ADGRG7	0.116376	0.172473	0.999464	0.0891	0.890111
GSTZ1	-0.154384	0.0843383	0.999464	0.08912	0.890111
SRF	-0.197574	0.077061	0.999464	0.08913	0.890111
FLNA	0.172928	0.0589244	0.999464	0.08914	0.890111
BPIFB2	-0.14004	0.10656	0.999464	0.08914	0.890111
SHKBP1	0.148931	0.104492	0.999464	0.08925	0.890566
RUNX1	-0.1954	0.0785331	0.999464	0.08954	0.890852
HCK	-0.132834	0.120388	0.999464	0.08955	0.890852
GPR83	0.149105	0.0997677	0.999464	0.08956	0.890852
FAM189B	-0.125779	0.160505	0.999464	0.08957	0.890852
ARPC1B	-0.178966	0.0826898	0.999464	0.08963	0.890852
NUP155	0.137061	0.119948	0.999464	0.08978	0.890852
LRP8	-0.142915	0.0944864	0.999464	0.08983	0.890852
APOB	-0.141907	0.105915	0.999464	0.08983	0.890852
PLEK	-0.148477	0.110121	0.999464	0.08989	0.890852
SLU7	0.167713	0.079891	0.999464	0.08999	0.890852
PIGP	-0.154379	0.102547	0.999464	0.09006	0.890852
CRNKL1	-0.109596	0.199031	0.999464	0.09019	0.890852
RCBTB1	-0.161776	0.132111	0.999464	0.09023	0.890852
EFL1	0.122636	0.140307	0.999464	0.09023	0.890852
LIN28B	0.157495	0.101932	0.999464	0.0903	0.890852
PIGW	-0.120627	0.163431	0.999464	0.09031	0.890852
PSORS1C2	0.152095	0.104658	0.999464	0.09081	0.892035
KIF19	-0.152137	0.0816055	0.999464	0.09104	0.892035
MAPKAPK3	0.147469	0.117405	0.999464	0.09107	0.892035
KCNH3	0.130955	0.121661	0.999464	0.09116	0.892035
WFDC13	0.132934	0.156693	0.999464	0.09116	0.892035
SLC35F6	0.141292	0.126971	0.999464	0.09139	0.892035
FAM120C	0.138968	0.135101	0.999464	0.09149	0.892035
NAV3	0.151215	0.0724382	0.999464	0.09152	0.892035
PRKY	-0.179404	0.0888337	0.999464	0.09154	0.892035
SMPDL3B	-0.149763	0.0853303	0.999464	0.09155	0.892035
ENPP1	-0.135877	0.095093	0.999464	0.09155	0.892035
DNAAF4	0.126466	0.151639	0.999464	0.09155	0.892035
PEX16	-0.122693	0.17639	0.999464	0.09156	0.892035
MVB12B	-0.186757	0.111105	0.999464	0.09161	0.892035
AZI2	-0.131465	0.137522	0.999464	0.09161	0.892035
APTX	0.153957	0.0974562	0.999464	0.09163	0.892035
HHIPL2	-0.152786	0.0826689	0.999464	0.0917	0.892035
PTPRK	0.152937	0.124885	0.999464	0.09181	0.892035
HACD1	0.16306	0.0933186	0.999464	0.09182	0.892035
AGTRAP	-0.129974	0.146899	0.999464	0.09183	0.892035
GPAT4	-0.207945	0.0659221	0.999464	0.09189	0.892035
TEKT4	-0.144462	0.112387	0.999464	0.09193	0.892035
LHX6	0.23248	0.0738597	0.999464	0.092	0.892035
SYT8	0.136658	0.143527	0.999464	0.09205	0.892035
NEK1	0.15546	0.0666395	0.999464	0.09212	0.892035
CAPS	-0.146331	0.104865	0.999464	0.09239	0.892035
ZGLP1	-0.113002	0.227137	0.999464	0.09241	0.892035
WDR72	-0.1261	0.129358	0.999464	0.09245	0.892035
UNC13B	-0.122782	0.135758	0.999464	0.09245	0.892035
OR6Q1	-0.14771	0.120132	0.999464	0.09266	0.892035
CHRNE	-0.136732	0.108487	0.999464	0.09271	0.892035
ZFP41	-0.189073	0.0448929	0.999464	0.09275	0.892035
DPM2	-0.200298	0.0660643	0.999464	0.09287	0.892035
PLXDC1	0.144363	0.0973467	0.999464	0.09293	0.892035
ADGRF3	-0.116358	0.180613	0.999464	0.09294	0.892035
CABIN1	-0.14794	0.0892467	0.999464	0.09301	0.892035
UNC13A	-0.203858	0.033488	0.99548	0.09303	0.892035
TRIOBP	0.128348	0.132126	0.999464	0.09305	0.892035
UTP23	0.164769	0.0733408	0.999464	0.09306	0.892035
IDO2	-0.115555	0.187028	0.999464	0.09314	0.892035
ART4	-0.108937	0.211965	0.999464	0.09317	0.892035
NSMCE4A	-0.133473	0.137827	0.999464	0.09345	0.892035
MED25	-0.149258	0.0994164	0.999464	0.09351	0.892035
SMARCE1	-0.179732	0.0919163	0.999464	0.09353	0.892035
PTRH2	-0.152537	0.100622	0.999464	0.09354	0.892035
LRRC55	-0.129463	0.145262	0.999464	0.09364	0.892035
ELOVL6	-0.207808	0.0697495	0.999464	0.09367	0.892035
SLC28A3	-0.103774	0.206321	0.999464	0.0937	0.892035
ATG5	0.19792	0.0746838	0.999464	0.0938	0.892035
MSR1	-0.125245	0.149324	0.999464	0.09387	0.892035
GSDME	-0.13917	0.0916156	0.999464	0.09389	0.892035
ACAD8	-0.135396	0.114676	0.999464	0.09391	0.892035
PTPN11	-0.243165	0.0548142	0.999464	0.09396	0.892035
CFAP36	-0.126932	0.153359	0.999464	0.09397	0.892035
SLC9A5	0.154698	0.0743032	0.999464	0.09398	0.892035
GULP1	0.17988	0.0718627	0.999464	0.09411	0.892656
ZNF263	-0.145913	0.0976252	0.999464	0.09437	0.894508
C19orf38	-0.125314	0.152228	0.999464	0.09449	0.894513
SRP14	0.149384	0.167287	0.999464	0.0945	0.894513
CSTF2T	-0.138006	0.175367	0.999464	0.0946	0.894802
NEB	-0.131063	0.111107	0.999464	0.09466	0.894802
NEURL1	0.154482	0.0977698	0.999464	0.09502	0.896791
RALYL	-0.194653	0.0778349	0.999464	0.09504	0.896791
GRK6	-0.15419	0.106143	0.999464	0.09509	0.896791
POLR3H	-0.196344	0.0849108	0.999464	0.09513	0.896791
NTF4	0.15309	0.110331	0.999464	0.09537	0.897144
KRT20	0.1484	0.0823734	0.999464	0.09538	0.897144
HADHB	-0.143165	0.104174	0.999464	0.09544	0.897144
TLR4	-0.117366	0.162712	0.999464	0.0955	0.897144
PAWR	0.139037	0.155196	0.999464	0.09555	0.897144
ZCRB1	0.21014	0.0929282	0.999464	0.09561	0.897144
TDRD1	-0.102989	0.206729	0.999464	0.09565	0.897144
AP2A1	-0.172179	0.104645	0.999464	0.09572	0.897144
KIRREL3	0.171601	0.109904	0.999464	0.09579	0.897144
OGFOD2	0.0960939	0.265763	0.999464	0.09586	0.897144
RETREG2	0.14827	0.0873154	0.999464	0.09602	0.897144
ALB	-0.15181	0.0703025	0.999464	0.0962	0.897144
FAM181B	0.140273	0.124885	0.999464	0.09624	0.897144
TNPO3	-0.144156	0.136628	0.999464	0.0963	0.897144
CYP17A1	-0.123422	0.139142	0.999464	0.09637	0.897144
AVEN	0.145478	0.12764	0.999464	0.0964	0.897144
DDX10	0.130844	0.131829	0.999464	0.0964	0.897144
UCP2	0.154966	0.105984	0.999464	0.09641	0.897144
ABCB10	-0.148599	0.0786476	0.999464	0.09645	0.897144
QRSL1	0.113543	0.176944	0.999464	0.09659	0.897144
CD19	-0.0986758	0.236037	0.999464	0.09663	0.897144
PLAC8L1	0.146033	0.0986696	0.999464	0.09664	0.897144
BLOC1S1	0.179888	0.0763222	0.999464	0.0967	0.897144
OR10K2	0.159864	0.105008	0.999464	0.09679	0.897144
PAPOLA	0.161666	0.106279	0.999464	0.09687	0.897144
PISD	-0.137636	0.116953	0.999464	0.09688	0.897144
GNAT2	0.162938	0.096763	0.999464	0.09696	0.897144
GDAP1L1	-0.131207	0.19092	0.999464	0.09704	0.897144
CD2AP	-0.130864	0.137793	0.999464	0.09705	0.897144
ZBED6	-0.143366	0.112173	0.999464	0.09739	0.897798
GDAP1	0.142357	0.129098	0.999464	0.09741	0.897798
BARX2	0.13975	0.127923	0.999464	0.09748	0.897798
JRK	-0.118302	0.171759	0.999464	0.09755	0.897798
TBC1D30	0.135204	0.106153	0.999464	0.09758	0.897798
CTSH	0.162802	0.0685453	0.999464	0.09771	0.897798
GRHL3	-0.119829	0.163095	0.999464	0.09777	0.897798
NTAQ1	0.1584	0.138181	0.999464	0.09779	0.897798
KCNQ4	-0.161675	0.090029	0.999464	0.09792	0.897798
CAND2	0.147759	0.0825875	0.999464	0.09805	0.897798
ITGA3	0.121408	0.141587	0.999464	0.09811	0.897798
KIF3C	0.156906	0.0897315	0.999464	0.09812	0.897798
DHODH	0.127419	0.146971	0.999464	0.09814	0.897798
RETREG3	0.143606	0.107242	0.999464	0.09816	0.897798
DACH2	0.169437	0.0795933	0.999464	0.0982	0.897798
TJP3	-0.11621	0.191449	0.999464	0.09822	0.897798
PRSS22	-0.116627	0.200794	0.999464	0.09824	0.897798
GEM	-0.17875	0.0830667	0.999464	0.0984	0.897798
NIT1	-0.139805	0.118443	0.999464	0.09841	0.897798
RUFY4	0.10273	0.233999	0.999464	0.09842	0.897798
ANKRD34B	0.132083	0.145309	0.999464	0.09854	0.89789
TTC23	-0.126738	0.124793	0.999464	0.09856	0.89789
APBA1	0.148865	0.131505	0.999464	0.09863	0.897935
YBX3	0.168073	0.0688707	0.999464	0.09895	0.899567
STIM2	-0.128016	0.141977	0.999464	0.09908	0.899567
RNF19B	-0.134029	0.141073	0.999464	0.09911	0.899567
CALHM1	0.139264	0.127649	0.999464	0.09918	0.899567
SCD	-0.124789	0.165566	0.999464	0.09918	0.899567
ZCCHC9	0.158075	0.0759017	0.999464	0.09928	0.899567
COL4A4	-0.0976998	0.240726	0.999464	0.09932	0.899567
PRODH	-0.152098	0.0917255	0.999464	0.09933	0.899567
MYT1L	-0.152004	0.0906029	0.999464	0.0995	0.900517
NAA35	0.211714	0.095769	0.999464	0.09973	0.901822
CHAF1A	-0.112473	0.176495	0.999464	0.09983	0.901822
POLR1E	0.119249	0.178293	0.999464	0.09984	0.901822
ANPEP	-0.118918	0.155717	0.999464	0.09992	0.901955
PPP4R1	-0.138649	0.10614	0.999464	0.1	0.902088
CD28	0.109515	0.216656	0.999464	0.10011	0.902174
PYGO1	-0.148698	0.109587	0.999464	0.10014	0.902174
NPTN	0.162579	0.0812132	0.999464	0.10036	0.903566
TGM7	-0.122662	0.138848	0.999464	0.10044	0.903698
SF1	-0.175133	0.0845564	0.999464	0.10056	0.904189
FASLG	0.123786	0.160573	0.999464	0.10079	0.905668
WWP2	-0.152717	0.070624	0.999464	0.10087	0.905798
CS	-0.175552	0.0822005	0.999464	0.10108	0.90592
KCNK13	0.153883	0.0905895	0.999464	0.1012	0.90592
RHOV	-0.208733	0.0978751	0.999464	0.10142	0.90592
DCLK3	0.1337	0.127897	0.999464	0.10158	0.90592
TANGO2	-0.120479	0.19766	0.999464	0.10182	0.90592
DACH1	0.165975	0.0971583	0.999464	0.10184	0.90592
TMPRSS3	-0.152944	0.0860398	0.999464	0.10189	0.90592
HS3ST4	-0.205294	0.0522466	0.999464	0.10194	0.90592
HAT1	-0.207206	0.0807354	0.999464	0.10194	0.90592
DNAJC5	0.205604	0.115029	0.999464	0.10195	0.90592
RIOK1	0.132294	0.124705	0.999464	0.10202	0.90592
GCNT1	-0.129706	0.144501	0.999464	0.1021	0.90592
SPATA25	-0.128251	0.145896	0.999464	0.1021	0.90592
UBE2J2	-0.176507	0.104013	0.999464	0.10211	0.90592
FRMPD3	-0.146009	0.0935493	0.999464	0.10221	0.90592
AQP5	-0.141163	0.148916	0.999464	0.10238	0.90592
IL18BP	-0.118966	0.199454	0.999464	0.10242	0.90592
TMC3	0.124782	0.137573	0.999464	0.10243	0.90592
FOXN2	-0.136436	0.129221	0.999464	0.10244	0.90592
NPY1R	-0.165166	0.0938284	0.999464	0.10254	0.90592
PSMG2	-0.131721	0.148111	0.999464	0.10254	0.90592
BIVM	-0.126696	0.160856	0.999464	0.10259	0.90592
QSOX2	-0.0950546	0.263931	0.999464	0.10266	0.90592
CPNE4	0.222172	0.0571046	0.999464	0.10274	0.90592
ALPK3	0.140227	0.111551	0.999464	0.10282	0.90592
KANSL3	-0.149506	0.0835069	0.999464	0.10284	0.90592
SNAP23	-0.171654	0.0829658	0.999464	0.10285	0.90592
PLD2	-0.126366	0.132611	0.999464	0.10291	0.90592
CARMIL3	0.133699	0.119336	0.999464	0.10302	0.90592
CHCHD4	-0.177487	0.0980608	0.999464	0.10308	0.90592
SLC66A1	-0.11746	0.174854	0.999464	0.10327	0.90592
RHBDL2	0.136643	0.118215	0.999464	0.10328	0.90592
C9orf40	-0.136902	0.167912	0.999464	0.10332	0.90592
GGCX	-0.110914	0.187244	0.999464	0.10337	0.90592
ENPEP	-0.14476	0.0823499	0.999464	0.10339	0.90592
TBXAS1	-0.1324	0.11625	0.999464	0.10342	0.90592
UMODL1	-0.123705	0.180126	0.999464	0.10347	0.90592
FGF5	0.155958	0.0975232	0.999464	0.10353	0.90592
AGXT2	-0.120808	0.149202	0.999464	0.10356	0.90592
AQR	0.122999	0.147672	0.999464	0.10357	0.90592
LRRC17	0.120284	0.16464	0.999464	0.1037	0.90592
ADGRG3	-0.130625	0.118634	0.999464	0.1039	0.90592
PLPPR1	-0.175518	0.132011	0.999464	0.10401	0.90592
MDH1	-0.146722	0.131542	0.999464	0.10403	0.90592
ADGRF5	-0.120175	0.149926	0.999464	0.10414	0.90592
CFDP1	0.133181	0.126453	0.999464	0.10421	0.90592
ELANE	-0.12628	0.149068	0.999464	0.10423	0.90592
ENTPD7	0.144459	0.109434	0.999464	0.10435	0.90592
OLFML3	0.14438	0.112596	0.999464	0.10435	0.90592
HIRA	-0.160363	0.0897482	0.999464	0.10448	0.90592
SNX4	-0.162513	0.088353	0.999464	0.10453	0.90592
C1orf43	0.170016	0.115406	0.999464	0.10456	0.90592
SIRT6	-0.135112	0.167305	0.999464	0.1046	0.90592
SLC2A6	-0.133703	0.120707	0.999464	0.10461	0.90592
CAMKV	0.135992	0.121434	0.999464	0.10464	0.90592
A2M	-0.133215	0.116626	0.999464	0.10474	0.90592
FAM210A	-0.121791	0.157812	0.999464	0.10477	0.90592
ANO9	-0.136202	0.14847	0.999464	0.10489	0.90592
HK2	-0.132279	0.144707	0.999464	0.10495	0.90592
GHRHR	0.118154	0.177237	0.999464	0.10495	0.90592
AK5	0.141157	0.102463	0.999464	0.10507	0.90592
TMEM131L	-0.160272	0.0533048	0.999464	0.10517	0.90592
PPM1J	-0.137405	0.120468	0.999464	0.10523	0.90592
MIER2	-0.134929	0.143449	0.999464	0.10531	0.90592
C20orf96	-0.109969	0.194246	0.999464	0.1054	0.90592
CLDN19	-0.192833	0.0718594	0.999464	0.10558	0.90592
CSPG4	0.119248	0.180022	0.999464	0.10561	0.90592
SEL1L2	-0.113248	0.194324	0.999464	0.10566	0.90592
PHYHIPL	-0.193362	0.114131	0.999464	0.10567	0.90592
KIN	0.155688	0.112758	0.999464	0.10569	0.90592
POR	-0.119366	0.161631	0.999464	0.10573	0.90592
VPS39	-0.152763	0.100111	0.999464	0.10576	0.90592
GPR26	0.184281	0.0820831	0.999464	0.10578	0.90592
FDXR	-0.11896	0.164622	0.999464	0.10579	0.90592
GLB1	-0.107601	0.217658	0.999464	0.1058	0.90592
ABCA4	0.125735	0.123968	0.999464	0.10623	0.906884
OGDHL	-0.13466	0.134328	0.999464	0.10628	0.906884
THPO	-0.0999157	0.248907	0.999464	0.10635	0.906884
SEMA7A	-0.11649	0.180115	0.999464	0.10637	0.906884
DCHS2	-0.136784	0.0939848	0.999464	0.10638	0.906884
CCNT2	0.165391	0.0642016	0.999464	0.10645	0.906884
ALAS2	0.148743	0.104938	0.999464	0.1065	0.906884
TRIM25	-0.111995	0.211833	0.999464	0.10654	0.906884
KPTN	-0.118515	0.180998	0.999464	0.10661	0.906884
APCDD1	-0.106899	0.231616	0.999464	0.10663	0.906884
DLC1	0.123677	0.151427	0.999464	0.10665	0.906884
RERGL	-0.167931	0.10569	0.999464	0.1067	0.906884
INA	0.171621	0.0861523	0.999464	0.10687	0.907771
RGPD4	-0.140036	0.114897	0.999464	0.10695	0.907796
CTU2	-0.105623	0.207684	0.999464	0.10702	0.907796
COQ6	-0.11466	0.17735	0.999464	0.10707	0.907796
UTP20	0.123478	0.127088	0.999464	0.1072	0.908207
MCM6	0.158994	0.0910954	0.999464	0.10725	0.908207
SSTR3	-0.111277	0.205747	0.999464	0.10735	0.9084
ARMT1	-0.117554	0.157624	0.999464	0.10743	0.9084
NPDC1	-0.137062	0.125913	0.999464	0.10747	0.9084
NXPH4	-0.14909	0.1218	0.999464	0.10762	0.9087
PAG1	-0.148531	0.086753	0.999464	0.10765	0.9087
MCM9	0.134893	0.104517	0.999464	0.10779	0.9087
FABP4	-0.18558	0.0749178	0.999464	0.10783	0.9087
TC2N	-0.10961	0.205681	0.999464	0.10788	0.9087
SSH1	0.151292	0.0776006	0.999464	0.1079	0.9087
RFTN2	0.137904	0.10171	0.999464	0.10822	0.910454
NAMPT	-0.208972	0.0611735	0.999464	0.10824	0.910454
FLRT3	0.156999	0.104659	0.999464	0.10832	0.910573
FABP2	-0.144209	0.114543	0.999464	0.1084	0.910691
AGPS	-0.132013	0.142225	0.999464	0.10854	0.911164
TMEM117	0.184703	0.0631058	0.999464	0.10865	0.911164
AFG3L2	-0.134372	0.127458	0.999464	0.10871	0.911164
PGAP2	-0.147859	0.132259	0.999464	0.10872	0.911164
MTX2	0.194577	0.0857357	0.999464	0.10888	0.911537
STEAP4	0.103896	0.215258	0.999464	0.10911	0.911537
RGS9BP	0.141046	0.139789	0.999464	0.10916	0.911537
SH2D2A	0.113076	0.211147	0.999464	0.10921	0.911537
ZAP70	0.121251	0.1871	0.999464	0.10928	0.911537
MYBPHL	0.143417	0.131411	0.999464	0.10935	0.911537
TRAF3IP2	0.153642	0.0659792	0.999464	0.1094	0.911537
FAM124A	0.142892	0.0921401	0.999464	0.10943	0.911537
PDZD7	-0.124071	0.147098	0.999464	0.10946	0.911537
SCPEP1	-0.108964	0.193585	0.999464	0.10948	0.911537
KIAA0930	-0.132942	0.174296	0.999464	0.10949	0.911537
SLC43A3	-0.131589	0.146832	0.999464	0.1096	0.911539
TFRC	-0.126193	0.141724	0.999464	0.10969	0.911539
CIDEC	-0.153199	0.093423	0.999464	0.10972	0.911539
PHF13	-0.180754	0.0637078	0.999464	0.10979	0.911539
ACIN1	0.109081	0.194685	0.999464	0.10982	0.911539
DIP2C	0.151415	0.140851	0.999464	0.10989	0.911572
PDCL3	-0.139685	0.138269	0.999464	0.11009	0.912683
CRISPLD1	-0.151655	0.102627	0.999464	0.11017	0.912799
APBA3	-0.128724	0.150859	0.999464	0.11034	0.913278
SFRP1	-0.219449	0.0790199	0.999464	0.11036	0.913278
AK4	-0.160314	0.104022	0.999464	0.11051	0.91349
HSP90B1	-0.145345	0.124533	0.999464	0.11054	0.91349
A4GALT	0.147272	0.105497	0.999464	0.11065	0.91349
CDHR1	0.135922	0.105522	0.999464	0.11065	0.91349
CEP164	0.132629	0.104501	0.999464	0.11079	0.9141
EVA1A	0.163672	0.0968793	0.999464	0.1109	0.914461
TRPM3	0.154093	0.0765769	0.999464	0.11102	0.914905
KCTD8	0.181918	0.0809465	0.999464	0.11113	0.915214
GRM2	0.154964	0.0938242	0.999464	0.11119	0.915214
OTOP2	-0.121866	0.174026	0.999464	0.1113	0.915287
MSX2	0.184199	0.0895535	0.999464	0.11134	0.915287
CACNG4	0.189489	0.0988296	0.999464	0.11146	0.915287
LRP2BP	0.11614	0.184791	0.999464	0.11148	0.915287
SMPD1	0.110056	0.203833	0.999464	0.11153	0.915287
OVOL2	-0.153767	0.110404	0.999464	0.11172	0.916302
MEF2A	0.138782	0.157977	0.999464	0.11184	0.916308
NUP54	0.164787	0.108623	0.999464	0.11209	0.916308
CCDC92	0.122408	0.175617	0.999464	0.11216	0.916308
TRERF1	0.120906	0.162452	0.999464	0.11223	0.916308
L3HYPDH	-0.145075	0.112362	0.999464	0.11224	0.916308
ARL4D	0.200438	0.0890768	0.999464	0.11226	0.916308
ETNPPL	0.135338	0.110862	0.999464	0.11228	0.916308
TPBG	-0.120376	0.172503	0.999464	0.11233	0.916308
CDX2	0.158227	0.136358	0.999464	0.11234	0.916308
NSFL1C	-0.195475	0.0803179	0.999464	0.11242	0.916308
OFD1	0.109804	0.191727	0.999464	0.11245	0.916308
JMJD6	0.16426	0.119739	0.999464	0.11253	0.916419
PNKD	-0.124282	0.206526	0.999464	0.11269	0.916509
TAOK2	-0.126779	0.149028	0.999464	0.11273	0.916509
OLIG2	-0.194889	0.0812461	0.999464	0.11274	0.916509
SBSPON	0.1544	0.0964849	0.999464	0.11284	0.916732
TTC13	-0.140846	0.12493	0.999464	0.1129	0.916732
MICALL1	-0.121375	0.186647	0.999464	0.11308	0.916955
SMO	-0.127067	0.17032	0.999464	0.11311	0.916955
ERI1	-0.120668	0.193053	0.999464	0.11314	0.916955
OXLD1	-0.102546	0.247512	0.999464	0.11326	0.916955
DALRD3	-0.122024	0.147996	0.999464	0.11336	0.916955
TMEM187	0.116022	0.221043	0.999464	0.11355	0.916955
NOL12	0.128137	0.172335	0.999464	0.11361	0.916955
PAPPA	-0.115602	0.160339	0.999464	0.11363	0.916955
SDR42E2	-0.13067	0.125216	0.999464	0.11374	0.916955
ADAMTS4	0.132166	0.127938	0.999464	0.11374	0.916955
TOMM40L	-0.175206	0.120071	0.999464	0.11378	0.916955
PDE6C	0.106467	0.213916	0.999464	0.11378	0.916955
APBB2	0.115571	0.173906	0.999464	0.11379	0.916955
PARD6B	-0.167917	0.0884103	0.999464	0.11403	0.917767
ATF6	0.136865	0.109441	0.999464	0.11405	0.917767
IL13RA2	-0.124529	0.138379	0.999464	0.11409	0.917767
GTF2H2	-0.174328	0.0685384	0.999464	0.11419	0.917824
CDO1	-0.166943	0.100383	0.999464	0.11423	0.917824
GLP1R	-0.13818	0.114095	0.999464	0.11437	0.918415
NCK2	0.159215	0.140752	0.999464	0.11449	0.918845
MYO10	0.148281	0.075085	0.999464	0.11465	0.919595
NOL4	0.173043	0.0760848	0.999464	0.11474	0.919783
PXMP2	-0.138767	0.115365	0.999464	0.11492	0.920692
IL7R	0.0965052	0.246554	0.999464	0.11518	0.921386
EIF4ENIF1	-0.135969	0.118636	0.999464	0.11527	0.921386
TASOR	-0.104823	0.206395	0.999464	0.11529	0.921386
IGFBP2	-0.157535	0.103464	0.999464	0.11534	0.921386
ABCG4	0.159426	0.104272	0.999464	0.11534	0.921386
BFAR	-0.130712	0.151271	0.999464	0.11552	0.921941
STC1	-0.162863	0.127278	0.999464	0.11566	0.921941
ANKRD13B	0.156219	0.106415	0.999464	0.11568	0.921941
LHFPL1	-0.178394	0.0944024	0.999464	0.11577	0.921941
TBCEL	0.188531	0.110184	0.999464	0.1158	0.921941
HECTD3	-0.152738	0.104726	0.999464	0.11581	0.921941
PPARG	-0.158386	0.11931	0.999464	0.11592	0.921941
APLN	-0.158259	0.136278	0.999464	0.11595	0.921941
TMEM87A	-0.145007	0.120404	0.999464	0.11604	0.921941
MPND	-0.155047	0.0868283	0.999464	0.11615	0.921941
FAM83F	0.125912	0.147153	0.999464	0.11621	0.921941
TAS1R3	-0.107604	0.207366	0.999464	0.11621	0.921941
PABPC5	0.175912	0.101126	0.999464	0.11631	0.922205
TRARG1	-0.111035	0.219557	0.999464	0.11649	0.922413
RBM27	0.136235	0.123693	0.999464	0.11657	0.922413
NCAPH	-0.121962	0.142516	0.999464	0.11661	0.922413
NMI	-0.102714	0.223838	0.999464	0.11663	0.922413
KRTAP7-1	-0.183371	0.108055	0.999464	0.11667	0.922413
WWTR1	0.154424	0.115745	0.999464	0.11678	0.922755
MTARC1	-0.137248	0.120897	0.999464	0.11696	0.923513
MYF5	0.165712	0.0836071	0.999464	0.11711	0.923513
TMCO3	-0.141382	0.100627	0.999464	0.11712	0.923513
CHCHD7	-0.12214	0.199522	0.999464	0.11715	0.923513
PKHD1L1	-0.106884	0.194486	0.999464	0.11721	0.923513
MRPL16	0.133317	0.132019	0.999464	0.11757	0.924949
RNASE13	-0.107803	0.196826	0.999464	0.1176	0.924949
F2RL1	0.131114	0.133995	0.999464	0.11763	0.924949
TOGARAM2	0.118229	0.156684	0.999464	0.11766	0.924949
AVPR2	-0.106441	0.226263	0.999464	0.1178	0.925523
SSBP1	-0.178755	0.0996113	0.999464	0.11792	0.925728
IGF1	0.128472	0.175063	0.999464	0.11796	0.925728
CD22	-0.115931	0.157731	0.999464	0.11827	0.927108
MPI	0.11909	0.170522	0.999464	0.11827	0.927108
AMOT	0.117009	0.181504	0.999464	0.11834	0.927111
C9orf64	-0.151043	0.0953891	0.999464	0.1185	0.927111
LRP11	-0.144093	0.126133	0.999464	0.1185	0.927111
STARD6	0.107396	0.273178	0.999464	0.11863	0.927111
TSACC	0.164763	0.112528	0.999464	0.11864	0.927111
MDFIC	0.123026	0.17521	0.999464	0.11873	0.927111
C2orf42	0.145348	0.127985	0.999464	0.11874	0.927111
KCNV2	0.122747	0.149995	0.999464	0.1189	0.927573
MEF2D	0.139298	0.162618	0.999464	0.11905	0.927573
CCDC106	-0.139171	0.136238	0.999464	0.11908	0.927573
FAM122B	0.131916	0.145824	0.999464	0.11921	0.927573
TNIK	0.155504	0.103162	0.999464	0.11929	0.927573
SLC25A10	0.117728	0.187436	0.999464	0.11935	0.927573
RBFOX3	0.176294	0.115409	0.999464	0.11947	0.927573
SUMF1	0.106872	0.22438	0.999464	0.11956	0.927573
YIF1B	-0.152586	0.131613	0.999464	0.1196	0.927573
PSMF1	0.133624	0.132658	0.999464	0.11966	0.927573
SKOR1	-0.158154	0.0943175	0.999464	0.11969	0.927573
SGPP1	-0.122965	0.198533	0.999464	0.11981	0.927573
ATXN2	-0.120298	0.158359	0.999464	0.11998	0.927573
IREB2	0.133154	0.147107	0.999464	0.12014	0.927573
LARP4B	-0.118868	0.17296	0.999464	0.12018	0.927573
NHSL1	-0.146477	0.088825	0.999464	0.12025	0.927573
HUS1	0.122866	0.165392	0.999464	0.12044	0.927573
IWS1	0.145527	0.0985261	0.999464	0.12057	0.927573
RHBDF1	-0.12766	0.152633	0.999464	0.12065	0.927573
CETN2	-0.221855	0.0805489	0.999464	0.12066	0.927573
CEP250	0.124943	0.139891	0.999464	0.12069	0.927573
CCDC188	-0.130892	0.155928	0.999464	0.12082	0.927573
AP3D1	-0.122716	0.172764	0.999464	0.12084	0.927573
IL4	-0.114524	0.177868	0.999464	0.12085	0.927573
ZFYVE27	0.130074	0.138662	0.999464	0.12113	0.927573
PTN	0.183144	0.108499	0.999464	0.12128	0.927573
EMCN	-0.121752	0.172697	0.999464	0.12128	0.927573
MKNK2	0.180458	0.0769249	0.999464	0.12131	0.927573
G2E3	-0.102037	0.22038	0.999464	0.12143	0.927573
CCDC50	-0.115795	0.176226	0.999464	0.12162	0.927573
TBCE	-0.114491	0.182799	0.999464	0.12173	0.927573
GATA2	-0.185725	0.0868846	0.999464	0.12177	0.927573
ZNF581	-0.149193	0.151239	0.999464	0.12187	0.927573
GRIPAP1	-0.112275	0.203447	0.999464	0.1219	0.927573
KIAA0100	-0.0931299	0.265215	0.999464	0.12196	0.927573
CLEC7A	0.129908	0.142283	0.999464	0.12203	0.927573
TMTC2	0.156172	0.0858374	0.999464	0.12206	0.927573
KDM4B	-0.108769	0.223505	0.999464	0.12213	0.927573
NGLY1	-0.115093	0.178881	0.999464	0.12216	0.927573
ROBO1	0.133158	0.12652	0.999464	0.12221	0.927573
NDC1	-0.133178	0.133968	0.999464	0.12229	0.927573
PPP1R21	0.107082	0.21127	0.999464	0.12233	0.927573
DESI2	-0.192541	0.112962	0.999464	0.12234	0.927573
CHIC1	0.174974	0.130585	0.999464	0.12248	0.927573
RFC5	0.159172	0.110053	0.999464	0.1225	0.927573
IQCG	-0.111431	0.194854	0.999464	0.1225	0.927573
ZC3H12A	-0.110518	0.188835	0.999464	0.12253	0.927573
DIS3L	0.138275	0.116673	0.999464	0.12255	0.927573
SYNM	0.158105	0.0807113	0.999464	0.12265	0.927573
PCNX2	-0.149495	0.0707261	0.999464	0.12274	0.927573
RNASEH2A	-0.13052	0.141977	0.999464	0.12277	0.927573
ABHD14A	0.124324	0.172453	0.999464	0.12281	0.927573
PITPNM2	-0.121808	0.150184	0.999464	0.12282	0.927573
PIGT	0.12618	0.152572	0.999464	0.12287	0.927573
MSL2	-0.23458	0.0664771	0.999464	0.12291	0.927573
CITED4	-0.158433	0.12516	0.999464	0.12294	0.927573
RNLS	0.109551	0.202537	0.999464	0.12294	0.927573
BPNT1	-0.146841	0.131226	0.999464	0.12299	0.927573
MDH1B	-0.109766	0.185675	0.999464	0.12311	0.927573
OR10Z1	-0.131746	0.180347	0.999464	0.12313	0.927573
AC010255	-0.171205	0.126462	0.999464	0.12318	0.927573
SLC24A2	0.124108	0.146976	0.999464	0.12326	0.927573
LRRC8C	-0.137213	0.175632	0.999464	0.12329	0.927573
MFSD8	-0.136267	0.116423	0.999464	0.1233	0.927573
GTF3C2	0.111979	0.192652	0.999464	0.12331	0.927573
MAP7	-0.121967	0.138393	0.999464	0.12338	0.927573
VPS11	0.132885	0.141213	0.999464	0.12348	0.927573
HSDL2	-0.115717	0.198765	0.999464	0.12354	0.927573
GJA10	0.170555	0.0735014	0.999464	0.12356	0.927573
KAT2A	0.155752	0.112609	0.999464	0.12365	0.927573
CCNH	-0.152592	0.131597	0.999464	0.12374	0.927573
BOLA3	0.153067	0.138632	0.999464	0.12375	0.927573
PDZD8	-0.0915116	0.267014	0.999464	0.12376	0.927573
INS	-0.135565	0.15792	0.999464	0.12377	0.927573
UBIAD1	-0.148411	0.123528	0.999464	0.12384	0.927573
ITPKC	0.0807603	0.384648	0.999464	0.12392	0.927573
NPAS1	-0.126868	0.170995	0.999464	0.12402	0.927573
RGPD6	-0.134254	0.130825	0.999464	0.12411	0.927573
PTGIS	-0.131513	0.132804	0.999464	0.12411	0.927573
BRD2	-0.144577	0.113613	0.999464	0.12431	0.927573
GMPS	-0.15796	0.12032	0.999464	0.12433	0.927573
MRPL52	0.138234	0.151727	0.999464	0.12434	0.927573
UTS2	0.126743	0.164185	0.999464	0.12437	0.927573
SLC35F5	-0.159126	0.0825685	0.999464	0.12465	0.927999
FABP7	0.212019	0.0737848	0.999464	0.1247	0.927999
HPS6	0.121675	0.174708	0.999464	0.12473	0.927999
CFAP300	0.146186	0.10812	0.999464	0.12476	0.927999
PLEKHG1	0.125055	0.122268	0.999464	0.12481	0.927999
FNBP1	-0.132328	0.142901	0.999464	0.12483	0.927999
ZNF329	-0.145507	0.112804	0.999464	0.12519	0.929769
PKNOX2	0.191003	0.0817877	0.999464	0.12523	0.929769
BRF2	0.115182	0.180154	0.999464	0.12539	0.929769
C16orf71	-0.0918384	0.308382	0.999464	0.12571	0.929769
ANKRD33B	-0.12367	0.156128	0.999464	0.12573	0.929769
NPY2R	0.163497	0.0878808	0.999464	0.12578	0.929769
TBX15	0.171672	0.0980347	0.999464	0.12586	0.929769
RNF208	-0.151249	0.137109	0.999464	0.12595	0.929769
WIPI1	0.135305	0.142326	0.999464	0.12598	0.929769
AKR1B1	-0.119787	0.183322	0.999464	0.12604	0.929769
MYO5C	0.130289	0.119593	0.999464	0.12605	0.929769
STAT1	0.116057	0.175245	0.999464	0.12605	0.929769
MYOT	-0.124552	0.15798	0.999464	0.12608	0.929769
APEX2	0.11892	0.188342	0.999464	0.12608	0.929769
MAP4K5	-0.143061	0.112946	0.999464	0.12617	0.929769
KLK11	-0.11874	0.196464	0.999464	0.12619	0.929769
CHTF8	0.18181	0.108803	0.999464	0.12628	0.929769
PAQR8	0.16832	0.0924582	0.999464	0.12633	0.929769
TBC1D13	-0.162603	0.104241	0.999464	0.12638	0.929769
FIGLA	-0.149175	0.132604	0.999464	0.12657	0.929769
GOLPH3L	0.178226	0.111413	0.999464	0.12659	0.929769
GRM8	0.136254	0.172092	0.999464	0.12662	0.929769
KPNA2	0.165295	0.132939	0.999464	0.12669	0.929769
CDV3	-0.151615	0.138217	0.999464	0.12671	0.929769
CCDC13	0.122911	0.143616	0.999464	0.12675	0.929769
CAVIN1	-0.142218	0.129474	0.999464	0.12686	0.930082
ITGA8	0.132696	0.111589	0.999464	0.12695	0.930195
GLRA2	-0.207606	0.0893591	0.999464	0.12701	0.930195
NAT10	0.146115	0.0805515	0.999464	0.12725	0.930366
ANKS6	-0.145098	0.0969156	0.999464	0.1273	0.930366
ZIC4	0.141429	0.123362	0.999464	0.1273	0.930366
CAVIN2	0.123865	0.14193	0.999464	0.12735	0.930366
ABCA9	0.155395	0.0861156	0.999464	0.12737	0.930366
PTPN9	0.156704	0.103686	0.999464	0.12778	0.932448
KIT	0.113949	0.176934	0.999464	0.12779	0.932448
CWC22	0.119733	0.161877	0.999464	0.12793	0.932631
CUL2	-0.16271	0.121222	0.999464	0.12795	0.932631
CALML3	0.196393	0.0808119	0.999464	0.12833	0.934908
CCL1	0.117107	0.186271	0.999464	0.12854	0.935301
EVC	0.0958548	0.263407	0.999464	0.1286	0.935301
C10orf90	0.125179	0.157512	0.999464	0.12873	0.935301
BTBD19	0.147922	0.105409	0.999464	0.12875	0.935301
DRGX	0.156478	0.107499	0.999464	0.12878	0.935301
CHST2	0.175032	0.0769979	0.999464	0.12879	0.935301
COMMD10	0.142929	0.129255	0.999464	0.12903	0.936551
TRIM73	0.116891	0.209442	0.999464	0.12917	0.936584
TRIM74	0.116891	0.209442	0.999464	0.12917	0.936584
HACD3	-0.14874	0.102032	0.999464	0.12929	0.936962
GUCA2B	-0.114096	0.205171	0.999464	0.12945	0.93746
ITK	0.159719	0.0867845	0.999464	0.12956	0.93746
ERC1	0.146331	0.120293	0.999464	0.12959	0.93746
HAPLN3	0.103979	0.244685	0.999464	0.12963	0.93746
FAM216B	-0.130836	0.177119	0.999464	0.12975	0.937651
MRPL30	-0.124629	0.171392	0.999464	0.12984	0.937651
C1orf131	-0.11771	0.167572	0.999464	0.12986	0.937651
TRPM1	0.138571	0.0953111	0.999464	0.12998	0.937682
PATE1	-0.101085	0.302524	0.999464	0.13	0.937682
FANCA	-0.101555	0.220971	0.999464	0.1302	0.938635
TMTC1	0.156404	0.109365	0.999464	0.13031	0.938938
INPP5E	-0.103355	0.234675	0.999464	0.13049	0.939012
NUCB1	0.150133	0.115772	0.999464	0.13062	0.939012
TBC1D8	0.131731	0.119451	0.999464	0.13064	0.939012
OR5AR1	-0.16142	0.101625	0.999464	0.13065	0.939012
FERMT1	0.128162	0.138506	0.999464	0.13066	0.939012
NUF2	-0.141482	0.131492	0.999464	0.13076	0.939172
CRYBG3	0.111649	0.187478	0.999464	0.13091	0.939172
SYCP2	-0.123594	0.127991	0.999464	0.13099	0.939172
ATG12	-0.156334	0.138919	0.999464	0.13104	0.939172
SLC5A7	-0.129731	0.15439	0.999464	0.13107	0.939172
PLEKHD1	0.144641	0.137165	0.999464	0.13109	0.939172
STAP1	0.121359	0.157748	0.999464	0.13122	0.93953
GHRL	-0.128511	0.172991	0.999464	0.13146	0.93953
RABL2B	-0.138226	0.157643	0.999464	0.13153	0.93953
CX3CR1	-0.140049	0.107875	0.999464	0.13154	0.93953
CLDN9	-0.175269	0.117573	0.999464	0.13166	0.93953
AGPAT2	-0.128048	0.176502	0.999464	0.13187	0.93953
SFXN1	-0.156048	0.100381	0.999464	0.13191	0.93953
DDX28	0.106171	0.238624	0.999464	0.13194	0.93953
WDR37	-0.139763	0.139827	0.999464	0.13197	0.93953
EAF1	0.174289	0.087749	0.999464	0.13198	0.93953
GARS1	-0.115405	0.201832	0.999464	0.13199	0.93953
TRIM28	-0.142507	0.141219	0.999464	0.13238	0.93953
EBI3	-0.131544	0.152102	0.999464	0.13243	0.93953
INTS6L	-0.101143	0.239588	0.999464	0.13263	0.93953
TEX37	0.157705	0.101469	0.999464	0.13269	0.93953
LIMCH1	0.119717	0.141813	0.999464	0.13275	0.93953
DAO	-0.107707	0.2086	0.999464	0.13275	0.93953
GPC4	-0.130514	0.13732	0.999464	0.13285	0.93953
WDFY2	0.177813	0.103506	0.999464	0.13294	0.93953
HSPA12B	-0.148567	0.108363	0.999464	0.13305	0.93953
PTH1R	0.126007	0.163165	0.999464	0.13307	0.93953
ENPP6	0.135852	0.104471	0.999464	0.13311	0.93953
ENPP3	-0.10553	0.204901	0.999464	0.13323	0.93953
RGPD1	-0.130448	0.145418	0.999464	0.13327	0.93953
FOXJ2	0.11441	0.191463	0.999464	0.13334	0.93953
CBLB	-0.139988	0.130553	0.999464	0.13337	0.93953
HASPIN	-0.0981133	0.266766	0.999464	0.13343	0.93953
ADGRL4	-0.11167	0.195554	0.999464	0.13363	0.93953
ATP10A	-0.128776	0.136609	0.999464	0.13367	0.93953
CITED2	0.19247	0.0776058	0.999464	0.13375	0.93953
RSBN1	-0.134574	0.131441	0.999464	0.13382	0.93953
TUT1	0.100334	0.229846	0.999464	0.13384	0.93953
RFESD	-0.154447	0.100855	0.999464	0.13388	0.93953
CD5	-0.112166	0.200378	0.999464	0.13397	0.93953
WRN	-0.104818	0.209585	0.999464	0.13402	0.93953
CNOT6	0.166161	0.121811	0.999464	0.13404	0.93953
EPB41L1	0.118646	0.148158	0.999464	0.13407	0.93953
ADAM10	-0.134541	0.141212	0.999464	0.1341	0.93953
TLR9	-0.10671	0.209525	0.999464	0.13425	0.93953
PRRT1	0.19306	0.080347	0.999464	0.13426	0.93953
ZNF608	0.138564	0.117343	0.999464	0.13442	0.93953
NOC2L	-0.0914197	0.280969	0.999464	0.13443	0.93953
DUSP23	0.156301	0.139003	0.999464	0.13445	0.93953
LAMA4	0.11589	0.157879	0.999464	0.13451	0.93953
TTLL13P	0.120619	0.151293	0.999464	0.13478	0.93953
GDI1	0.209242	0.105578	0.999464	0.13497	0.93953
GTPBP4	-0.129144	0.147882	0.999464	0.13504	0.93953
DNAI1	0.11724	0.161677	0.999464	0.13509	0.93953
PRKDC	-0.104922	0.196796	0.999464	0.13544	0.93953
RNF4	-0.162595	0.12573	0.999464	0.13545	0.93953
SFR1	0.129098	0.158172	0.999464	0.13548	0.93953
TM7SF3	-0.115769	0.16704	0.999464	0.13557	0.93953
NCKIPSD	0.141741	0.101034	0.999464	0.13583	0.93953
FRYL	0.129483	0.118034	0.999464	0.13586	0.93953
DMRTA1	-0.130728	0.149518	0.999464	0.13603	0.93953
NCAM1	0.140134	0.111789	0.999464	0.13608	0.93953
TSPAN32	-0.125856	0.180164	0.999464	0.1363	0.93953
ADRA1A	-0.11635	0.199993	0.999464	0.13634	0.93953
UQCRC2	-0.122862	0.165403	0.999464	0.13639	0.93953
MEIKIN	-0.110474	0.210836	0.999464	0.13641	0.93953
GBE1	-0.107603	0.207369	0.999464	0.13642	0.93953
TNRC18	-0.122336	0.160676	0.999464	0.13644	0.93953
MAST1	-0.122504	0.15081	0.999464	0.13646	0.93953
CGB5	-0.131861	0.16578	0.999464	0.13648	0.93953
SUSD4	0.128649	0.16686	0.999464	0.13651	0.93953
TMEM101	0.171751	0.125239	0.999464	0.13658	0.93953
SLC6A8	-0.148164	0.154109	0.999464	0.13667	0.93953
TWF1	-0.162645	0.104151	0.999464	0.13669	0.93953
CXXC5	0.156488	0.107476	0.999464	0.13669	0.93953
[truncated: 11,914 more rows]

## Sheet: Table_S4
Table S4. Tissue enrichment analysis results from RERconverge. Multiple hypothesis testing corrections were performed by generating Q-values using Storey’s correction method. Permulation P-values were generated from 100,000 null statistics. A negative enrichment statistic (Stat) signifies the following pattern: the greater the decrease in carnivory, the higher the rate of evolution of the gene. F…
Tissue	Stat	# Genes in Gene Set	Gene Rankings	Parametric P-value	Parametric Q-value	Permulation P-value	Permulation Q-value
tibial.artery	0.110637	92	SMAD7:218, FLNA:307, TMTC1:601, TLN1:604, AMIGO2:900, PDE3A:920, MCAM:972, WFDC1:992, CSPG4:1003, SGCD:1083, TBX18:1089, TAGLN:1111, HEY2:1133, GJA4:1207, CRLF1:1384, NR4A3:1546, NOTCH3:1655, TNS1:1712, TASP1:1852, SLIT3:2086, PRELP:2101, RCAN2:2301, JAG1:2353, ROR1:2398, KCNAB1:2423, MSRB3:2573, CCN5:2638, HTR1B:2648, PDZRN4:2657, KCNE4:2730, NTRK3:2867, CDH6:2906, MAP3K7CL:3001, ZFHX3:3069, FOX…	0.00026369	0.00219741	0.00063	0.0315
liver	-0.157592	289	BHMT:15, ACAA2:16, ACADSB:17, NAGS:20, FABP1:41, ACMSD:49, AGXT:61, ACY1:64, ACOX2:71, TAT:77, MAT1A:98, UROC1:111, MOGAT2:116, NR1I2:141, ABCB4:143, HSD17B2:164, SDS:183, DECR2:211, ACOT12:219, SLC25A15:220, LDHD:242, HOGA1:290, ABCB11:301, DMGDH:324, ARID3C:332, CLRN3:343, HPD:348, NR1H4:355, HSD17B13:358, STARD10:368, UGT1A1:376, HPX:381, RIDA:382, ANGPTL3:388, GYS2:390, SLC38A4:396, ANGPTL8:4…	1.28e-19	6.38e-18	0.00174	0.0368333
cortex.kidney	-0.146241	97	CLDN16:3, BHMT:15, SLC12A1:31, CLCNKB:32, FABP1:41, ACMSD:49, SLC5A12:65, AOC1:115, SLC5A2:155, TMEM139:181, BSND:208, UMOD:222, FMO1:238, KCNJ1:243, EMX1:270, CLRN3:343, SLC6A12:353, CYP24A1:383, SLC22A2:385, DIO1:415, PTGER1:457, MIOX:497, ATP6V0A4:568, SLC12A3:660, BBOX1:777, LRRC19:928, RNF186:962, OGDHL:997, AGXT2:1103, ALDOB:1149, CASR:1252, CLDN2:1418, SLC3A1:1544, ENAM:1847, SLC22A6:1920,…	7.42e-07	1.24e-05	0.00221	0.0368333
peyers.patch	-0.145298	151	SLC13A2:2, RBP2:22, SLC6A19:29, SLC51A:40, FABP1:41, MEP1B:44, SI:46, SLC23A1:48, SLC5A12:65, B3GALT5:78, SLC10A2:79, TRPA1:102, SLC7A9:114, AOC1:115, MOGAT2:116, NR1I2:141, SLC6A20:151, SLC28A2:154, URAD:171, ACSL5:188, TMIGD1:197, CDH17:273, CLDN15:279, CLCA1:288, CLRN3:343, MYO1A:472, VIL1:484, SPINK4:503, GPR35:535, SULT1A2:541, ENPEP:648, CPO:686, NAALADL1:774, RGS13:776, PLS1:801, APOB:812,…	1e-09	2.5e-08	0.01409	0.14675
sigmoid.colon	0.0990053	46	LIMS2:13, CHRNA3:73, PLEKHO1:189, HAND1:321, HLX:376, TACR2:457, BMP3:743, DES:817, ROR2:873, FOXP2:1338, WNT9A:1615, PNCK:1620, PLA2G2C:1914, GUCY1A1:2097, TES:2985, CHRM2:3942, CACNA1C:4041, VIP:4175, GJC1:4195, GDNF:4241, BAG2:4426, GALR2:4678, GREM2:4717, NKX3-2:4800, PDE9A:4867, BTC:5061, DPT:5466, NTSR1:6059, CNN1:6635, HTR3A:7185, F2RL2:7443, CCDC9B:7930, NKX2-3:8882, MYLK:9068, SEMA3A:971…	0.0204861	0.0731647	0.01754	0.14675
thyroid	-0.0687297	139	IYD:27, CLCNKA:87, TMC4:94, GPAT3:247, COL4A3:276, SLC26A4:280, RTN4RL2:317, TFF3:403, DIO1:415, TMEM30B:438, GGTLC1:481, MIOX:497, SLC26A7:577, SMPDL3B:674, ISM1:694, HIRA:711, LRP8:739, SORD:740, GGT2:792, TCERG1L:810, STC1:955, WDR72:964, OTOS:1085, TMEM171:1150, LPCAT2:1198, ATP8A1:1202, SLC5A8:1269, IDO2:1336, BSPRY:1357, PKHD1L1:1387, MGAT4C:1395, DUOX2:1663, COL4A4:1720, ZMAT4:1760, DIO2:1…	0.00551441	0.027572	0.01761	0.14675
transformed.skin.fibroblast	0.063381	232	FRAS1:91, PF4:128, CXCL6:166, DSE:168, PF4V1:242, SRGAP1:276, MMP2:303, CCND1:313, NAV3:387, CHST2:415, CITED2:419, FGF5:526, OLFML3:625, MRC2:714, CRIM1:715, TENM3:747, PCDH18:756, WIPI1:797, CLEC11A:859, NABP1:874, LAMA4:890, PCDHGA11:924, KIRREL1:941, COL10A1:942, TGFBI:1029, GPR1:1261, MMP14:1266, FSTL1:1274, CNN2:1294, VASN:1306, C6orf120:1322, SERPINH1:1330, RAI14:1438, COL5A2:1439, KITLG:1…	0.00103369	0.0060737	0.03103	0.198167
pancreas	-0.10608	80	PNLIP:4, GNMT:5, CPB1:7, PNLIPRP2:9, SYCN:13, CELA3B:33, PRSS3:51, CLPS:53, CTRC:66, AQP8:76, SLC43A1:89, PLA2G1B:207, GATM:230, TMED6:389, CPA1:407, CTRL:460, GRPR:495, PM20D1:557, TRPV6:663, PNLIPRP1:676, KCNK16:755, GLP1R:867, RNF186:962, ALDOB:1149, INS:1157, CASR:1252, CPA2:1677, PGGHG:1953, SLC4A4:2198, MATN4:2324, ASCL5:2554, KIRREL2:2767, GP2:2819, TEX11:3142, ONECUT1:3269, F11:3828, G6PC…	0.00109327	0.0060737	0.03363	0.198167
coronary.artery	0.170483	14	CCDC3:175, TIMP1:261, MYO18B:374, PCOLCE2:1257, HEYL:2376, ST6GALNAC5:3003, COL4A1:3129, SUSD5:4433, CCDC190:4856, SOST:5111, CCN3:7674, SPINK13:8976, MTHFD1L:11043, GJA5:12688	0.02731	0.0874105	0.03567	0.198167
transverse.colon	-0.092047	124	SLC26A3:24, TRPM6:35, FABP1:41, AOC1:115, MOGAT2:116, ATP8B1:120, NR1I2:141, URAD:171, TSPAN1:194, TMIGD1:197, CDH17:273, CLCA1:288, CLRN3:343, MYO1A:472, VIL1:484, SLC26A2:546, SMPDL3B:674, OMP:767, DHRS9:785, GUCA2A:821, LRRC19:928, WNK4:941, ATP10B:956, RNF186:962, MUC4:1015, ISX:1066, TMEM171:1150, LGALS4:1228, OTOP2:1260, R3HDML:1311, TJP3:1366, GUCA2B:1466, CLDN4:1754, CLDN3:1783, CA2:2048,…	0.000439853	0.00314181	0.04486	0.2243
blood	-0.0729772	226	AQP9:122, NFE2:140, SLC4A1:180, EPB42:189, MMP8:224, PTAFR:232, ACSL1:282, DOK3:312, TSPO2:422, GCA:423, MMP9:428, FFAR2:447, PYGL:452, NAMPT:498, ITGA2B:555, TLR2:579, GRK6:814, CX3CR1:825, MFSD2B:849, TBXAS1:882, ADGRG3:897, HCK:908, RHAG:915, SLC6A6:920, SLC43A2:1014, AGTRAP:1081, ELANE:1101, C19orf38:1120, C5AR2:1214, TSPAN32:1296, SRGN:1422, HCAR2:1441, BIN2:1468, STK17B:1486, GP9:1489, LY6G…	0.000190972	0.00190972	0.05732	0.260545
prostate	0.0899193	32	PDE11A:183, CPNE4:295, NR2E3:530, NTF4:608, HOXB13:1315, SRD5A2:1387, TULP1:1591, TNFSF15:1734, SPDEF:2731, ARHGEF38:3180, KRT5:3466, ACP3:3725, NPY:4568, GLIS1:4996, EPHA3:5271, CREB3L4:5313, LMAN1L:6005, SCUBE2:6911, ALDH1A3:7272, FOXA1:7307, SHROOM1:7381, TRPM8:7577, SERPINB11:7597, NKX3-1:7876, CHRNA2:8234, SLC45A3:9345, STEAP2:10080, P2RX2:11362, MKX:11505, TTC6:11691, HOXD13:11798, CPA6:126…	0.0788521	0.179209	0.07925	0.3038
hypothalamus	0.095131	53	NPY2R:477, VSTM5:633, GRIK1:883, QRFPR:1075, TMEFF2:1178, MC4R:1305, SYT6:1522, CARTPT:1571, SNCG:1632, GLRA3:1810, TMEM255A:1850, GRM7:2167, SMIM17:2286, NTS:2571, CSMD3:2806, FNDC9:2972, CHRM5:3182, AIRE:3302, LY6H:3372, OXT:3534, ADCYAP1:3764, BRINP3:3888, GSX1:4322, GABRG3:4883, SCN9A:5173, ENKUR:5210, RAB3C:5458, PIRT:6032, GABRQ:6144, GHRH:6295, B3GAT2:6497, TMEM114:6885, PCDH19:7046, DLX2:…	0.0169076	0.0666086	0.08629	0.3038
Brodmann.area.9	0.0942853	149	POU6F2:108, KCTD16:126, CDH8:184, NSF:311, DACH2:433, GPR26:445, SYT1:462, KCNC2:491, FAM81A:508, C11orf87:534, NPM2:539, AK5:554, DRGX:593, VSTM5:633, PAX7:700, CALHM1:708, MAP2:734, HTR1A:781, NELL1:785, HTR3B:936, SLC35F1:1015, SYT13:1109, TMEM132D:1149, LRRTM3:1364, BAALC:1369, CDH9:1386, RS1:1497, RIMKLA:1577, SCN3B:1699, GLRA3:1810, KCNH5:1858, RORB:1925, ERC2:2126, GRM7:2167, GABRB3:2204, …	8.19e-05	0.00102436	0.08647	0.3038
adrenal.gland	-0.0518497	99	SLC14A2:1, CELA1:8, CYP11A1:267, FADS2:408, BCO2:529, SLC16A9:558, PAPSS2:599, ABCB1:645, AOX1:717, AGRP:993, CYP17A1:1034, MC2R:1087, FDXR:1200, MGST1:1315, AKR1B1:1316, RNF128:1504, SLC37A2:1535, FAM43B:1758, KCNQ1:1790, APOE:2092, ADGRV1:2434, ASB4:2460, SCARB1:2471, HTR2B:2522, CDH2:2697, MAP3K5:2813, DHCR24:2986, KCNN2:3150, SLC47A1:3191, CTSA:3221, SNTB1:3327, SEMA6A:3388, CYSLTR2:3503, TBX…	0.0762705	0.179209	0.09114	0.3038
aorta	0.0457984	145	STAC:216, PDGFA:299, PDGFD:354, MYO18B:374, LDOC1:400, C8orf34:555, ITGA8:616, OSR1:843, ITGA11:946, SGCA:949, ITGA10:1079, SPARC:1185, PCDH11X:1187, MRAP2:1349, HAPLN3:1426, ADAMTSL3:1779, ITGB3:1814, CLEC18A:1816, POSTN:1883, PRDM6:1996, EXT1:2035, TNFRSF11B:2037, MYOCD:2040, GABRR1:2139, EFEMP1:2148, PMEPA1:2166, PRDM16:2383, PCDH7:2439, ITGA9:2551, THRB:2580, KALRN:2608, PID1:2752, PDLIM7:284…	0.0590359	0.163989	0.10478	0.327437
nucleus.accumbens	0.0692913	85	FAT3:49, SH2D5:221, LRRC7:247, DACH2:433, CACNG4:535, KIRREL3:605, CAMKV:678, GABRB1:683, ANKRD34B:810, RGS8:1051, PCDH11X:1187, OPRK1:1244, KCTD4:1366, MINDY4B:1370, KCNIP1:1517, POU3F4:1550, JAKMIP1:1737, CHRM4:2451, LAMP5:2530, PRMT8:2556, LRRTM1:2563, GPR88:2753, CSMD3:2806, GPR6:3229, LIX1:3428, LYPD1:3460, SV2C:3591, HTR2C:4037, GNAL:4154, PTPN5:4266, ARPP21:4283, KCNIP2:4287, CPNE5:4364, G…	0.0279714	0.0874105	0.12682	0.373
ovary	0.0458983	89	C21orf62:151, ROBO3:205, RASL11B:380, PROK1:588, IGDCC4:658, SOX4:801, LRRC17:928, SUSD4:935, KCNT2:960, IGSF10:1376, LHX9:1637, GLI2:1666, GXYLT2:1784, SGCZ:1795, INHA:1804, KCNMB2:2177, GATA4:2210, MMP23B:2445, UBXN8:2858, NXPH2:2903, NLGN4X:2932, ANGPTL5:3030, SLC8B1:3216, ADRB3:3257, NYNRIN:3270, PDGFRA:3316, HTRA3:3333, CPZ:3666, MEX3A:3744, CHST7:3796, NR5A1:3849, CCDC194:4036, WFIKKN2:4123…	0.136458	0.268238	0.16709	0.449368
caudate.nucleus	0.0981097	26	ETNPPL:609, GABRG1:1170, LRRC10B:1218, PDE1B:1669, MAPK4:1719, GPR88:2753, RLBP1:2854, HS3ST5:2956, MLC1:4516, NR2E1:4687, RGS14:4708, PPP1R1B:4941, GRM3:4945, ANO3:5315, GPR37L1:5349, SLC35D3:6214, WIF1:6411, AQP4:6702, FAM237A:7614, CHAT:8193, VAX1:9232, SYNDIG1L:9700, TAC1:10256, SLC1A2:10712, SLCO1C1:11258, PSD2:11935	0.0837714	0.182112	0.17076	0.449368
stomach	-0.0596823	76	PGA3:21, TFF2:36, KRTCAP3:86, PGA5:90, EPN3:167, SLC9A3:201, SLC9A4:213, CBLIF:239, SLC26A9:362, TMED6:389, TMPRSS2:471, GKN2:505, CLDN18:576, PGC:608, PRR15L:615, CLDN23:888, CAPN9:1223, GHRL:1254, PDILT:1372, SLC5A5:1612, A4GNT:1719, GKN1:1744, TOX3:1830, BAIAP2L1:2592, ADAM28:2872, AGR2:2932, CYP2S1:2987, RASSF6:3149, ATP4B:3343, C9orf152:4063, MCIDAS:4091, B4GALNT3:4273, KCNE2:4330, RFLNA:468…	0.0732592	0.179209	0.19502	0.470238
esophagus.muscularis.mucosa	0.0694996	25	FAM83D:344, SYNM:438, DPYSL3:1496, CHRM3:1649, PALLD:2033, CCDC69:2050, RGMB:2218, RGS2:2381, COL4A6:3103, HSPB8:3848, EPHA7:4436, CYSLTR1:4897, S1PR3:5788, GADL1:5948, SYNPO2:6052, F2RL2:7443, SMTN:7915, PGM5:8168, FOXF2:9130, KCNMB1:10746, TPM1:10765, PRUNE2:11554, NKX6-1:12802, NTN1:12835, MYH11:13876	0.229651	0.39595	0.1975	0.470238
endocervix	0.0514699	67	CTSK:74, ISLR:118, REM1:869, IGF1:975, MSX1:1084, BDKRB1:1118, PKD1L2:1188, NXNL2:1358, STRA6:1604, GABRE:1761, MITF:1770, TRHDE:1832, FBLN1:1834, GLP2R:1876, IGFBP5:2155, TGM2:2260, TMEM132C:2837, SNCAIP:2851, ELFN1:3008, NRG1:3359, BDKRB2:3969, PAMR1:4258, ADGRA2:4447, ERN1:4537, GPNMB:4731, LAMC3:4939, DIO3:5026, GATD3A:5070, OSR2:5274, PRSS12:5353, SLC18A2:5364, TACR1:5769, LUM:5872, SMPDL3A:…	0.146654	0.268238	0.21776	0.494909
minor.salivary.gland	-0.0566393	67	BPIFB1:50, KRTCAP3:86, OXGR1:209, RUNX1:619, PRSS8:816, BPIFB2:818, PROM1:823, OVOL2:839, LPO:932, AQP5:1099, ENPP3:1465, TRPV4:1533, IRX1:1598, PAX3:1818, CCL28:1837, SERINC2:1995, ATP6V1B1:2097, OTX1:2348, SLC6A14:2369, TMEM211:2684, DNASE2B:2902, AMTN:3628, LRRC26:3648, SCNN1A:3826, MMP10:3995, MMP7:4012, VTCN1:4491, KCNN4:4737, TCN1:5013, NKX2-3:5031, PLEKHS1:5206, C4orf19:5285, JCHAIN:5469, …	0.110215	0.229614	0.27492	0.597652
cerebellar.hemisphere	0.0400808	413	CKMT1B:2, KCND2:11, TAFA3:19, TMEM81:48, CADM3:54, UBASH3B:132, BARHL2:141, MINAR1:197, KIF26B:244, CAMKK2:305, CADM1:320, RELN:341, KCND3:350, SYT9:389, FABP7:394, NOL4:407, DLG4:409, KCTD8:440, INA:467, PAX6:482, KIF3C:486, GPR83:541, CXXC5:592, NPTX1:649, ZIC4:689, GDAP1:719, CLVS1:723, CLCN4:751, LRRC4:809, VAX2:812, RASGRF1:828, TMEM266:837, NBEA:894, ZIC3:969, SNCA:1013, ANKRD34A:1033, CCDC…	0.00640197	0.0290999	0.28983	0.603812
uterus	0.0383554	50	RSPO1:233, IL17RD:324, ADAMTS19:364, LIPI:472, LEFTY2:521, TMEM200A:834, TRPC4:848, LINGO2:895, RSPO3:1588, MOXD1:2374, FBXL22:2421, KCNMA1:2547, DENND2B:2944, SULF2:3443, TBC1D1:4070, BNC2:4108, FRMD7:4209, HOXD4:4402, HOXD9:4405, MRGPRF:4740, GPR161:5240, MAMDC2:5470, TMEM200B:5471, TCF23:5613, SSC5D:5663, SHISAL1:6108, LCN6:6454, MEIS3:6852, KCNG1:6876, TGFB1I1:7376, KLHL13:7525, ESR1:8197, PT…	0.349446	0.563622	0.3184	0.6368
cerebral.cortex	0.0551128	94	POU6F2:108, CHRM1:410, PHF24:577, DRGX:593, ARNT2:635, KCNH3:681, CALHM1:708, HTR1A:781, VSTM2L:862, HTR3B:936, RCVRN:1078, RASL10A:1129, KCNAB2:1150, BRSK1:1237, SYN1:1249, CDH9:1386, RS1:1497, CIT:1504, RIMKLA:1577, C1QL2:1847, CHST1:2100, SNPH:2410, LRTM2:2416, GPR45:2500, KCNN1:2619, PDE6H:2671, MAS1:2700, ZDHHC22:2741, NANOS3:2766, NEUROD2:2857, NCALD:3105, EIF4E1B:3314, FAM163B:3652, RIMS3:…	0.0662304	0.17429	0.33143	0.637365
cerebellum	0.0351793	327	CKMT1B:2, KCND2:11, CKMT1A:15, TAFA3:19, TRIM7:24, ALDOC:32, SEMA6C:50, IQSEC2:70, ESYT3:90, PDC:96, BARHL2:141, GLRA4:237, RELN:341, CLK4:388, TRPM3:412, SPOCK2:428, PRAG1:430, PRRT1:436, LPCAT4:460, PAX6:482, NEURL1:528, GPR83:541, ABCG4:564, ANKRD13B:586, RBFOX3:639, CARMIL3:662, ZIC4:689, L1CAM:693, SHISA6:746, PLEKHD1:759, REEP2:808, TMEM266:837, GRAMD1B:860, ZIC3:969, ADGRL1:984, TMEM74:103…	0.0319523	0.0939773	0.41836	0.774741
esophagus.mucosa	-0.0306046	190	KRT16:68, KRT32:192, SCNN1B:277, MAL:300, P2RY2:441, SPINT1:527, SMAGP:627, IL1RN:662, KDF1:675, TMPRSS11D:684, CAPNS2:691, RHOV:757, ADGRF1:809, PADI1:851, TMEM184A:904, PLEKHN1:1071, FOXN1:1144, PKP1:1163, SLC9A3R1:1168, CRB3:1186, GRHL3:1189, TMPRSS11F:1373, KLK11:1401, PRSS22:1443, SULT2B1:1507, LYPD3:1571, IL36B:1591, SOX15:1595, OTOP3:1648, GJB3:1845, TRIM16:1857, TBX6:1948, BTBD11:1998, GR…	0.150203	0.268238	0.52527	0.888633
tibial.nerve	-0.0158285	173	FXYD1:92, SECISBP2L:129, MIA:195, SLC9A3:201, FOXD2:349, MYMK:356, MPZ:397, CLDN19:578, LGI4:585, KIF19:642, SLC27A6:672, PRODH:722, SHC4:760, CDO1:769, CLCN2:824, KCTD11:847, PODN:974, PTGFR:977, EHBP1:1000, RHBDF1:1124, SPHK1:1262, AASS:1285, FAM178B:1364, THBS4:1410, IL17B:1438, WNT6:1670, INSC:1950, SLC24A4:1982, PLLP:2078, CHRDL1:2106, KLRG2:2303, PLAG1:2400, LGI2:2412, PLEKHA4:2440, SLC36A2…	0.477039	0.674576	0.52644	0.888633
skeletal.muscle	0.0282047	225	CUTC:27, MYF6:136, BIN1:157, MYLK3:279, CKMT2:332, YBX3:366, MYO18B:374, MKNK2:414, CAND2:448, ACTN3:452, TBX15:531, ALPK3:615, SMCO1:661, PAX7:700, RGS9BP:779, MUSTN1:800, P2RX6:825, CAVIN4:907, DUSP26:910, IP6K3:962, HSPB3:998, ANKRD39:1240, TCAP:1389, SRPK3:1391, BAG3:1421, KLHL40:1427, ASB12:1471, RAPSN:1483, DCAF6:1552, XIRP1:1562, RETREG1:1563, IDH2:1612, TNNT1:1630, USP13:1634, NEXN:1643, …	0.150214	0.268238	0.53318	0.888633
C1.spinal.cord	0.0167823	159	PEA15:37, GPR37:134, MOG:195, DPYSL5:287, FAM124A:498, PAQR8:499, RFTN2:551, ENPP6:565, CA14:597, FAM181B:696, CHST6:766, SLC24A2:820, C10orf90:884, TMEM151A:943, BACE1:985, KLHL32:1011, HEPACAM:1055, SEPTIN8:1157, DSCAML1:1367, WDR49:1379, POLR2F:1548, MYRF:1656, FGF1:1663, CHADL:2081, CCNE2:2146, AGPAT4:2180, RBM11:2321, SYNJ2:2333, RASSF2:2340, SEMA4D:2377, MOBP:2488, ANKS1B:2532, ARHGAP22:254…	0.469307	0.674576	0.57412	0.898
subcutaneous.adipose	-0.0237297	65	CYP1A1:43, ACACB:487, CD36:522, FABP4:595, CIDEC:730, PPARG:902, MTARC1:914, AGPAT2:1274, G0S2:1351, ADGRL4:1394, TRARG1:1575, AVPR2:1629, MEOX1:1793, GPAM:1941, CIDEA:2100, RDH5:2160, SLC19A3:3011, FASN:3048, PNPLA2:3669, FZD4:3694, ADIPOQ:3947, VWF:4005, F13A1:4204, GPBAR1:4262, PLIN1:4493, ARHGEF15:4669, AQP7:5171, PFKFB3:5213, ANGPTL4:5243, SIGLEC1:5790, CLDN5:6015, BMP6:6114, GALNT15:6157, G…	0.509754	0.688857	0.62858	0.898
vagina	-0.0315158	80	KRT16:68, SULT1E1:134, EDN3:261, TMPRSS11D:684, CAPNS2:691, SCNN1G:954, PLEKHN1:1071, FOXN1:1144, PKP1:1163, GRHL3:1189, GJB6:1281, CPA6:1292, TMPRSS11F:1373, SULT2B1:1507, LYPD3:1571, GJB3:1845, HOXD13:2115, CSTA:2530, RHCG:2887, CASP14:2942, PRSS27:3061, EPHX3:3368, SERPINB12:3470, TMPRSS11A:3887, KRT13:4357, NCCRP1:4425, SFN:4512, RNF222:4608, EDN2:4699, DSG1:4740, EVX1:4748, CLCA2:4774, CERS3…	0.331984	0.553307	0.63182	0.898
pituitary.gland	0.0150222	185	GJB7:83, AHI1:98, COL11A2:264, GAL:558, SYT5:613, TMEM179:618, MANEAL:679, KSR2:686, PLD3:826, SIX6:836, GHRHR:986, GPR68:990, FBXO16:997, VWDE:1175, GPR19:1284, KCNH6:1318, CRHR2:1365, SCG5:1478, NSG1:1695, SCN3B:1699, CIBAR2:1724, TSHB:1774, UNC5D:1798, ALK:1803, GCK:1879, GH1:1995, CAPSL:2038, RAX2:2068, KCNH2:2095, CPEB1:2314, CDKN2A:2404, GPR61:2467, NTS:2571, BICDL1:2596, PITX2:2655, GPHA2:…	0.485695	0.674576	0.64376	0.898
breast	0.0354963	14	THRSP:328, NPY2R:477, ALX4:1264, KRT5:3466, LEP:4484, LMX1B:5842, ABCB5:6193, TNN:6836, GSC:7150, PLIN1:9420, HCAR1:9788, ADIPOQ:9966, CIDEC:13183, FABP4:13318	0.645853	0.807316	0.65014	0.898
bladder	-0.030027	21	CYP4B1:477, SLC14A1:1348, UPK3A:1419, CLEC3A:1532, UPK1B:1579, UPK1A:1854, PLA2G4A:2565, PADI3:4320, KRT13:4357, TMC7:4390, ARL14:6436, UPK2:6826, SEMA3E:7180, SNX31:8308, RD3:8977, PLA2G2F:9021, SIGLEC15:12119, ACER2:12419, WFDC13:13036, MSX2:13429, ID1:13536	0.6342	0.807316	0.6519	0.898
testis	0.0220973	1196	NAA11:1, SAP130:10, TAFA3:19, REEP1:35, PPEF2:41, TENT5C:42, ZNF574:77, SLC30A8:102, OVOL1:133, CFAP299:138, BARHL2:141, ACTL7A:161, CRYBA4:176, PPM1G:199, C8orf88:220, C11orf16:223, POC1A:224, KLHDC9:230, MYLK3:279, SPATA4:286, ACTL7B:290, SPACA4:310, ACP4:335, NKAPL:368, MYO18B:374, FBXO43:402, PTRH1:413, PKD2L1:416, TTC21A:420, SEPTIN12:427, REC114:446, CETN3:451, FAM229A:454, STAT4:481, KCNK1…	0.0173182	0.0666086	0.66452	0.898
suprapubic.skin	-0.019697	167	HS3ST6:25, KRT75:56, KRT16:68, CA6:118, PLA2G4D:212, KRT39:237, PPP1R14C:525, CAPNS2:691, KRT73:1056, PLEKHN1:1071, AQP5:1099, FOXN1:1144, PKP1:1163, GRHL3:1189, HR:1282, VAV3:1369, TMPRSS11F:1373, SULT2B1:1507, LYPD3:1571, IL36B:1591, IRF6:1791, CHP2:1810, GJB3:1845, ACER1:1865, ATP12A:1906, SERPINB7:1929, NIPAL1:1975, TNS4:2025, KRT79:2071, ATP6V1B1:2097, THEM5:2362, ALOX12B:2380, UNC93A:2425, …	0.384406	0.600634	0.68985	0.907287
greater.omentum	-0.0226767	29	HBEGF:59, LPL:136, TCF15:440, FABP4:595, CIDEC:730, ATF3:815, MTARC1:914, MEST:1701, SLC7A10:1731, PRRT4:2812, ADIPOQ:3947, SOX17:3970, BTNL9:4268, PLIN1:4493, FAM89A:5660, SPRY1:7677, LEP:9429, HAS1:9491, TIMP4:10008, BARX1:10050, IL6:10434, BNC1:11585, CH25H:11608, FFAR3:11739, GPR4:12145, ADAMTS9:12887, ADAMTS4:13202, THRSP:13585, GFPT2:13852	0.673018	0.820753	0.72072	0.907287
leg.skin	-0.0125482	195	HS3ST6:25, CYP1A1:43, KRT75:56, KRT16:68, CA6:118, SULT1E1:134, OXGR1:209, PLA2G4D:212, ATP6V1C2:293, KLK8:350, ATP13A5:418, IFFO2:671, CAPNS2:691, C3orf52:923, KRT73:1056, PLEKHN1:1071, AQP5:1099, XKRX:1108, FOXN1:1144, PKP1:1163, GRHL3:1189, GPRIN2:1197, TMPRSS11F:1373, SLC28A3:1475, SULT2B1:1507, LYPD3:1571, SPTLC3:1590, IL36B:1591, KRT23:1616, RDH12:1645, PTPN3:1703, GJB3:1845, ACER1:1865, SE…	0.550245	0.724006	0.81101	0.907287
fallopian.tube	0.0109822	44	ALX1:65, FOSB:768, BCHE:974, STOML3:1140, BOC:1234, GATA5:1285, TULP1:1591, NGF:1980, SLITRK3:2359, ANGPTL1:2420, CDON:2474, ADAMTS3:2845, HOXA6:3123, PI15:3877, EGR1:5035, DTHD1:5184, ANKRD66:5257, TCF23:5613, HOXA7:6930, SERTM1:6993, CCDC198:7006, MMP19:7057, SELE:7142, CCDC17:7557, LTC4S:7725, ESR1:8197, MSLNL:8714, CFAP73:8832, CRISPLD2:8875, GMNC:9174, ATP8B4:9553, RARRES1:9814, BRS3:10576, …	0.801474	0.873233	0.81527	0.907287
atrium.auricle	0.00726796	82	MYLK3:279, TNNI3:308, CKMT2:332, ADAMTS7:362, MYO18B:374, NPPA:455, SMCO1:661, MYBPHL:728, TMEM182:807, HSPB3:998, TCAP:1389, XIRP1:1562, NEBL:1842, MLIP:2199, LMOD2:2379, KLHL31:2441, SBK2:2519, CORIN:2626, TNNI3K:2722, ADPRHL1:2816, SCN5A:2908, ASB15:3022, DKK3:3512, ACTN2:3581, PAM:3664, NRAP:4261, ALPK2:4264, TBX20:4318, RYR2:4369, ANKRD1:4567, LRRC10:4851, SHD:4999, MYL7:5560, ASB11:5771, LM…	0.820839	0.873233	0.82294	0.907287
putamen	-0.0227043	14	SLC18A3:1707, RASD2:2670, GBX2:3377, DIPK1C:3835, SYNDIG1L:4213, PDE10A:4661, FAM237A:6299, KCNH4:6485, OPALIN:6689, ANO3:8598, GRM3:8968, RGS9:10195, GPR88:11160, LRRC10B:12695	0.768813	0.873233	0.823	0.907287
lung	0.0090944	126	HECW2:5, PF4:128, AGER:206, TRPC6:253, VEGFD:518, FLRT3:570, ACVRL1:947, TBX4:950, ITGB6:1236, TFPI:1242, COL6A5:1258, IL7R:1441, OTULINL:1462, RS1:1497, DRAM1:1529, ROS1:1678, IL18R1:1721, RSPO4:1741, IDO1:2292, CSF3:2523, CCL20:2744, KCNS3:2999, NCKAP5:3062, WNT2:3101, CSF3R:3111, WNT3A:3172, PTGS2:3203, CPA3:3228, MRC1:3353, TM4SF19:3377, TBX2:3560, BCL2A1:3603, SFTPB:3853, CASS4:3876, SLIT2:3…	0.726328	0.864676	0.82514	0.907287
EBV.lymphocyte	0.00928568	605	GLCCI1:6, TOP2A:111, MLLT3:114, PGK1:150, PTPN6:228, PCLAF:250, TAF4B:255, KCNN3:357, BFSP2:361, CTSH:363, RBM15:365, CENPH:386, POU2F2:396, IRF8:398, FBXO43:402, LMNB2:441, ANP32E:490, MCM6:495, MTFR2:515, PIK3R6:583, GINS2:587, MELK:621, ITGB7:631, ADA:656, EZH2:657, ISG20:749, IL12A:762, HMGB2:881, STAP1:888, MDFIC:976, STAT1:977, IL16:978, SNX25:1006, TNFAIP8:1018, HELB:1066, GPR174:1070, STA…	0.452172	0.674576	0.83995	0.907287
left.ventricle	0.00869039	64	MYLK3:279, TNNI3:308, CKMT2:332, MYO18B:374, SMCO1:661, HSPB3:998, TCAP:1389, XIRP1:1562, TENM2:1785, MYZAP:1888, MYH7B:2001, MLIP:2199, LMOD2:2379, TNNI3K:2722, ADPRHL1:2816, SCN5A:2908, ASB15:3022, ANKRD2:3031, ACTN2:3581, NRAP:4261, ANKRD1:4567, LRRC10:4851, POPDC2:4891, LDB3:4908, ASB11:5771, FSD2:6175, ASB10:6427, C10orf71:6491, NKX2-5:6809, MB:6825, FABP3:6907, GJA3:6973, SMPX:7085, PKP2:71…	0.810658	0.873233	0.85115	0.907287
substantia.nigra	-0.0141785	11	SLC6A11:2093, SLC6A3:2219, TH:2427, KCNE5:4808, DBX2:5450, KLHL1:6990, C10orf105:8816, SPX:8960, RPE65:9783, CHRM5:10731, RET:10918	0.870721	0.885071	0.85285	0.907287
ectocervix	-0.00999014	23	ADRA1D:506, ADRA2A:984, FGF7:1002, HOXD13:2115, MMRN1:2285, EDNRA:4100, KCNK6:4224, TSKU:5625, ESR1:5716, PRLR:5884, COL5A1:5977, PTHLH:5995, SOCS2:6825, LRFN5:7513, CPXM1:8329, FGF10:9768, PAPPA2:10074, COL27A1:10474, MATN2:10860, ADAMTSL5:11001, F10:11581, RIPOR3:11831, TRHDE:12081	0.868433	0.885071	0.89019	0.90766
spleen	0.00551802	244	RAG1:60, NTN4:99, PF4:128, CXCL6:166, PF4V1:242, TXK:260, BFSP2:361, SLC9A5:397, PKD2L1:416, TRAF3IP3:417, ITK:469, CCR2:557, UCP2:582, CXCR5:617, CCR4:758, GPR171:841, STAP1:888, FASLG:901, KLHL6:968, ZAP70:1045, BLK:1096, STAB2:1168, CD28:1251, GRAP:1410, RENBP:1641, GPR34:1781, SLAMF8:1845, SPIC:2025, PDE2A:2060, IGFLR1:2112, THEMIS:2157, SEMA3D:2240, IL10RA:2457, ATP2A3:2471, SCML4:2600, CRHB…	0.769777	0.873233	0.89548	0.90766
Brodmann.area.24	0.00871733	23	CRH:915, FAM107A:2422, NANOS3:2766, NEUROD2:2857, PTER:3005, IDS:4080, CNTN5:4525, DRD5:4713, SLC39A12:4830, OSTN:5503, CSPG5:5949, SLC25A18:5974, RAPGEF4:7534, DOK6:7652, SLC17A7:8471, TAC3:8702, FAM189A1:9605, DDN:10524, SLC6A1:11171, GRIN3A:11225, KCNS1:11255, GAD1:12463, NTRK2:13352	0.885071	0.885071	0.90766	0.90766

## Sheet: Table_S5
Table S5. Gene pathway enrichment analysis results from RERconverge. Multiple hypothesis testing corrections were performed by generating Q-values using Storey’s correction method. Permulation P-values were generated from 100,000 null statistics. A negative enrichment statistic (Stat) signifies the following pattern: the greater the decrease in carnivory, the higher the rate of evolution of the g…
Pathway	Stat	# Genes in Gene Set	Gene Rankings	Parametric P-value	Parametric Q-value	Permulation P-value	Permulation Q-value
REACTOME_BIOLOGICAL_OXIDATIONS	-0.190319	126	ALDH1B1:26, CYP1A1:43, ACY1:64, MAT1A:98, AOC1:115, MGST3:130, RXRA:133, SULT1E1:134, ALDH1A1:165, COMT:176, FMO1:238, CYP11A1:267, CYP19A1:302, CHAC2:341, GSTO1:347, PTGS1:351, NR1H4:355, UGT1A1:376, CYP24A1:383, PODXL2:411, CYP4B1:477, SLC26A1:492, SULT1A2:541, SLC26A2:546, UGDH:550, CYP26C1:553, PAPSS2:599, GGT1:639, GSTZ1:667, MAOA:673, CYP7A1:761, TBXAS1:882, MTARC1:914, BPNT1:976, PTGIS:994…	2.08e-13	2.62e-11	0	0
REACTOME_METABOLISM_OF_AMINO_ACIDS_AND_DERIVATIVES	-0.127551	270	GNMT:5, GLS2:10, BHMT:15, ACADSB:17, NAGS:20, IYD:27, GOT2:30, ACMSD:49, GLUD1:57, AGXT:61, TAT:77, CBSL:93, MAT1A:98, RPL3L:107, UROC1:111, GRHPR:160, SDS:183, NQO1:215, QDPR:217, SLC25A15:220, GATM:230, HOGA1:290, GCDH:291, HIBCH:297, GOT1:318, DMGDH:324, GAMT:331, CBS:335, SLC44A1:340, HPD:348, SLC6A12:353, RIDA:382, DIO1:415, PYCR2:421, SARDH:439, BCKDK:445, AGMAT:540, CPS1:563, HGD:584, PAPS…	9.33e-13	9.77e-11	1e-05	0.00263176
REACTOME_PHASE_I_FUNCTIONALIZATION_OF_COMPOUNDS	-0.211995	63	ALDH1B1:26, CYP1A1:43, AOC1:115, RXRA:133, ALDH1A1:165, FMO1:238, CYP11A1:267, CYP19A1:302, PTGS1:351, NR1H4:355, CYP24A1:383, CYP4B1:477, CYP26C1:553, MAOA:673, CYP7A1:761, TBXAS1:882, MTARC1:914, PTGIS:994, POR:1183, FDXR:1200, CMBL:1390, CYP2R1:1467, CYP46A1:1569, ALDH2:1587, AOC2:1596, MTARC2:1785, CYB5R3:1836, CYP27B1:1961, CYP7B1:2179, ADH5:2298, CYP1B1:2604, CYP2S1:2987, CYP27A1:3205, CYP4…	6.39e-09	4.46e-07	1e-05	0.00263176
REACTOME_METABOLIC_DISORDERS_OF_BIOLOGICAL_OXIDATION_ENZYMES	-0.258736	28	ACY1:64, MAT1A:98, CYP11A1:267, CYP19A1:302, UGT1A1:376, CYP24A1:383, CYP26C1:553, GGT1:639, MAOA:673, TBXAS1:882, CYP17A1:1034, FDXR:1200, CYP2R1:1467, GCLC:1496, CYP27B1:1961, CYP7B1:2179, CYP1B1:2604, CYP27A1:3205, TPMT:3581, AHCY:4414, SLC35D1:5060, CYP26B1:5973, CYP2U1:6441, GSS:6778, OPLAH:7814, CYP21A2:8234, GCLM:11156, FDX2:11605	2.2e-06	6e-05	2e-05	0.00394764
REACTOME_SIGNALING_BY_ALK_IN_CANCER	0.167134	41	ATIC:210, STAT5A:471, MSN:765, PPFIBP1:855, PPM1B:1065, SQSTM1:1286, EEF1G:1603, SEC31A:1766, ALK:1803, STRN:2533, VCL:2993, IRS1:3116, JUNB:3294, MAPK3:3331, MYH9:3500, BCL2A1:3603, FRS3:3736, MECP2:3794, ZC3HC1:3812, SHC1:3918, TPR:4025, EML4:4044, BIRC6:4069, FN1:4253, NPM1:4308, HIP1:4751, RNF213:5028, FRS2:5970, GCC2:6129, TFG:6197, PLCG1:6351, DCTN1:7047, LMO7:7605, PRKAR1A:8036, CARS1:8195…	0.000217504	0.00257822	7e-05	0.0110534
REACTOME_SYNTHESIS_OF_BILE_ACIDS_AND_BILE_SALTS_VIA_7ALPHA_HYDROXYCHOLESTEROL	-0.316544	19	ACOX2:71, RXRA:133, ABCB11:301, HSD17B4:321, NR1H4:355, ACOT8:442, CYP7A1:761, PTGIS:994, SLC27A2:1044, SLC27A5:1398, SCP2:1771, CYP7B1:2179, AMACR:2464, CYP27A1:3205, NCOA2:3412, CYP8B1:5101, HSD3B7:6162, NCOA1:7902, AKR1D1:8096	1.81e-06	5.41e-05	9e-05	0.011279
KEGG_GLYCINE_SERINE_AND_THREONINE_METABOLISM	-0.285815	30	GNMT:5, BHMT:15, AGXT:61, SDS:183, GATM:230, DMGDH:324, GAMT:331, CBS:335, SARDH:439, MAOA:673, CTH:741, SHMT2:864, GLDC:921, AGXT2:1103, PIPOX:1304, DAO:1497, PSAT1:1541, AOC2:1596, DLD:1875, GCAT:2135, GLYCTK:2805, MAOB:4251, SRR:4816, CHDH:5508, ALAS1:5725, PSPH:6416, PHGDH:6794, SHMT1:9845, AMT:10366, ALAS2:13342	6.21e-08	3.25e-06	0.0001	0.011279
REACTOME_AMINO_ACID_TRANSPORT_ACROSS_THE_PLASMA_MEMBRANE	-0.286139	30	SLC6A19:29, SLC36A1:85, SLC43A1:89, SLC7A6:91, SLC7A9:114, SLC6A20:151, SLC6A12:353, SLC38A4:396, SLC7A11:510, SLC7A2:620, SLC6A18:747, SLC6A6:920, SLC43A2:1014, SLC3A1:1544, SLC7A5:1725, SLC7A10:1731, SLC7A8:1835, SLC7A7:2004, SLC38A3:2031, SLC6A14:2369, SLC36A2:2512, SLC25A29:3857, SLC36A4:4073, SLC1A4:4484, SLC38A1:6029, SLC16A10:7629, SLC3A2:7747, SLC38A2:9280, SLC6A15:10011, SLC7A1:11805	6e-08	3.25e-06	0.00013	0.0128298
KEGG_ARGININE_AND_PROLINE_METABOLISM	-0.2064	53	GLS2:10, NAGS:20, ALDH1B1:26, GOT2:30, GLUD1:57, ACY1:64, AOC1:115, GATM:230, GOT1:318, GAMT:331, PYCR2:421, AGMAT:540, CPS1:563, MAOA:673, PRODH:722, ALDH4A1:1033, ASS1:1096, ALDH3A2:1123, ARG1:1461, DAO:1497, SAT2:1505, ALDH2:1587, PYCR1:1849, PYCR3:1871, ALDH18A1:1922, NOS1:2009, SRM:2057, P4HA1:2578, P4HA2:2915, SAT1:3946, ODC1:4019, MAOB:4251, ALDH7A1:4272, CKM:4610, OTC:4780, AZIN2:5028, NO…	2.12e-07	8.9e-06	0.00015	0.0129195
REACTOME_SLC_MEDIATED_TRANSMEMBRANE_TRANSPORT	-0.145015	226	SLC14A2:1, SLC13A2:2, SLC1A1:6, SLC26A3:24, SLC6A19:29, SLC12A1:31, SLC34A3:38, SLC5A12:65, SLC36A1:85, SLC43A1:89, SLC7A6:91, SLC7A9:114, SLC31A1:125, SLC6A20:151, SLC28A2:154, SLC5A2:155, SLC39A3:156, SLC44A2:168, SLC4A1:180, SLC9A3:201, SLC9A4:213, SLC26A4:280, SLC44A1:340, SLC6A12:353, SLC26A9:362, SLC22A2:385, SLC38A4:396, SLC22A7:459, SLC26A1:492, SLC7A11:510, SLC29A2:519, SLC26A2:546, SLC2…	9.53e-14	1.5e-11	0.00018	0.0129195
REACTOME_HEME_DEGRADATION	-0.346363	10	FABP1:41, HMOX2:169, ABCC1:310, UGT1A1:376, ALB:567, SLCO1B1:1746, HMOX1:1873, BLVRA:3570, SLCO2B1:3772, BLVRB:7809	0.000149628	0.00188006	0.00018	0.0129195
REACTOME_CYTOCHROME_P450_ARRANGED_BY_SUBSTRATE_TYPE	-0.208534	37	CYP1A1:43, RXRA:133, CYP11A1:267, CYP19A1:302, NR1H4:355, CYP24A1:383, CYP4B1:477, CYP26C1:553, CYP7A1:761, TBXAS1:882, PTGIS:994, POR:1183, FDXR:1200, CYP2R1:1467, CYP46A1:1569, CYP27B1:1961, CYP7B1:2179, CYP1B1:2604, CYP2S1:2987, CYP27A1:3205, CYP4V2:3376, NCOA2:3412, PDCD6-AHRR:3707, CYP8B1:5101, CYP26B1:5973, AHRR:6375, CYP2U1:6441, CYP2E1:6895, CYP26A1:6914, CYP2W1:7129, NCOA1:7902, CYP21A2:…	1.17e-05	0.00025248	0.00025	0.0164485
KEGG_FATTY_ACID_METABOLISM	-0.327964	34	ACAA2:16, ACADSB:17, ALDH1B1:26, CPT1A:152, ACADM:184, ACSL5:188, ACADVL:235, ACSL1:282, GCDH:291, HADH:322, ECI2:494, ACAA1:551, HADHB:796, ALDH3A2:1123, ACSL6:1320, ACOX1:1335, ALDH2:1587, EHHADH:1602, HADHA:1780, ACSL4:2244, ACSL3:2260, ADH5:2298, ACAT1:2817, ECI1:2940, CPT1B:2963, ACADS:3077, CPT2:3084, ALDH7A1:4272, ACADL:4579, ECHS1:6305, ACOX3:6496, CPT1C:6522, ALDH9A1:6755, ACAT2:8794	3.83e-11	3.44e-09	0.0003	0.0182199
KEGG_REGULATION_OF_ACTIN_CYTOSKELETON	0.0949393	159	SOS1:68, TIAM2:190, ARHGEF12:209, MYLK3:279, PDGFA:299, IQGAP1:330, SCIN:333, PDGFD:354, CHRM1:410, SSH1:418, ACTN3:452, FGF5:526, ITGA8:616, FGD1:630, ITGB7:631, MSN:765, ITGA3:792, ITGA11:946, LIMK2:981, ITGA10:1079, BDKRB1:1118, DOCK1:1213, ITGB6:1236, GNA12:1272, PPP1CA:1332, ITGB4:1555, WASF1:1633, FGF6:1648, CHRM3:1649, FGF1:1663, BCAR1:1726, ITGB3:1814, PIP4K2C:1950, PDGFB:2030, PAK2:2085,…	4.02e-05	0.000646863	0.00039	0.021994
KEGG_PPAR_SIGNALING_PATHWAY	-0.213785	62	FABP1:41, ACOX2:71, RXRA:133, LPL:136, CPT1A:152, ACADM:184, ACSL5:188, ACSL1:282, PCK1:401, FADS2:408, CD36:522, ACAA1:551, PCK2:569, FABP4:595, SLC27A6:672, CYP7A1:761, SLC27A4:770, FABP2:870, PPARG:902, ME1:966, SLC27A2:1044, SCD:1205, ACSL6:1320, ACOX1:1335, SLC27A5:1398, EHHADH:1602, SCP2:1771, PPARD:1850, ACSL4:2244, ACSL3:2260, ILK:2713, APOA5:2801, CPT1B:2963, CPT2:3084, CYP27A1:3205, ADI…	6.29e-09	4.46e-07	0.0005	0.0263176
REACTOME_TRANSPORT_OF_SMALL_MOLECULES	-0.0965396	596	SLC14A2:1, SLC13A2:2, SLC1A1:6, SLC26A3:24, SLC6A19:29, SLC12A1:31, CLCNKB:32, TRPM6:35, SLC34A3:38, FTH1:39, ACO1:42, SLC5A12:65, AQP8:76, ANO6:80, ATP1A1:81, SLC36A1:85, CLCNKA:87, SLC43A1:89, SLC7A6:91, FXYD1:92, ABCD3:99, TRPA1:102, SLC7A9:114, ATP8B1:120, AQP9:122, SLC31A1:125, LPL:136, ABCB4:143, SLC6A20:151, SLC28A2:154, SLC5A2:155, SLC39A3:156, ASIC5:158, SLC44A2:168, HMOX2:169, SLC4A1:18…	3.74e-15	7.84e-13	0.00056	0.0276335
REACTOME_PHASE_II_CONJUGATION_OF_COMPOUNDS	-0.1692	59	MAT1A:98, MGST3:130, SULT1E1:134, COMT:176, CHAC2:341, GSTO1:347, UGT1A1:376, PODXL2:411, SLC26A1:492, SULT1A2:541, SLC26A2:546, UGDH:550, PAPSS2:599, GGT1:639, GSTZ1:667, BPNT1:976, MTR:1005, SULT1A4:1121, MGST2:1133, SULT1A3:1174, MGST1:1315, GCLC:1496, SULT2B1:1507, GSTK1:1630, ESD:1842, MAT2B:1983, MTRR:2041, GGCT:2518, SLC35B3:2739, GLYATL3:3031, SLC35B2:3438, TPMT:3581, SULT4A1:3627, CHAC1:…	7.27e-06	0.000169103	0.00065	0.0285107
REACTOME_SIGNALING_BY_HIPPO	0.219217	16	AMOTL1:119, WWTR1:640, DVL2:773, AMOT:1010, AMOTL2:1581, YAP1:1750, TJP1:2036, WWC1:2870, STK3:3567, NPHP4:4372, SAV1:4529, TJP2:4973, LATS1:5674, STK4:8708, LATS2:10894, CASP3:10913	0.00240992	0.0154492	0.00065	0.0285107
REACTOME_FATTY_ACID_METABOLISM	-0.214909	143	ACAA2:16, ACOT13:28, CYP1A1:43, ACOX2:71, HSD17B3:95, HACD2:104, RXRA:133, ACACA:137, CPT1A:152, ACADM:184, ACSL5:188, DECR2:211, ACOT12:219, ACADVL:235, TECRL:259, ACSL1:282, ABCC1:310, HSD17B4:321, HADH:322, HSD17B8:345, PTGS1:351, FADS2:408, ACOT8:442, ELOVL7:454, THEM4:455, CYP4B1:477, ACACB:487, ECI2:494, ACAA1:551, ELOVL6:562, PON3:598, GGT1:639, PTGR1:665, HACD3:782, NUDT7:788, HADHB:796, …	1.1e-18	6.91e-16	0.00071	0.0295034
REACTOME_DIGESTION_AND_ABSORPTION	-0.357797	13	PNLIP:4, PNLIPRP2:9, SI:46, CLPS:53, SLC2A2:588, PNLIPRP1:676, GUCA2A:821, NPC1L1:1361, GUCA2B:1466, LCT:1866, PIR:4160, RSC1A1:4467, SLC2A5:8882	8e-06	0.00017958	0.00079	0.0311863
KEGG_STARCH_AND_SUCROSE_METABOLISM	-0.239824	26	SI:46, PGM2:124, HK1:175, UGT1A1:376, GYS2:390, PYGL:452, UGDH:550, ENPP1:742, HK2:1065, ENPP3:1465, GBE1:1488, PYGM:1756, AGL:1781, UXS1:2364, GANC:2827, PYGB:3367, G6PC2:4716, GBA3:5609, GYS1:5726, GPI:6227, PGM2L1:6566, HK3:6894, UGP2:7173, GUSB:7670, PGM1:9033, GCK:12034	2.35e-05	0.000439386	0.00088	0.033085
REACTOME_INTERLEUKIN_17_SIGNALING	0.15794	50	TRAF6:240, JUN:289, IL17RA:340, MAPKAPK3:648, MEF2A:892, CHUK:925, DUSP7:993, RPS6KA5:1493, RPS6KA2:1508, IL17RB:1565, TAB3:1772, IL17RC:1802, PPP2R1B:2051, IL25:2065, ATF1:2221, MAPK9:2446, PPP2R5D:2802, MAP2K7:3060, MAPKAPK2:3274, MAPK3:3331, DUSP4:3802, TAB1:3932, VRK3:4155, NOD2:4173, IL17A:4827, TNIP2:5289, NFKB1:5375, MAPK10:5583, NOD1:5783, MAP2K6:5913, MAP2K3:5940, IL17C:6141, UBE2V1:6274…	0.000114906	0.0014805	0.00115	0.0405062
REACTOME_NUCLEAR_EVENTS_STIMULATED_BY_ALK_SIGNALING_IN_CANCER	0.23403	11	STAT5A:471, ALK:1803, JUNB:3294, MAPK3:3331, BCL2A1:3603, MECP2:3794, ZC3HC1:3812, EML4:4044, FN1:4253, NPM1:4308, KIF5B:9561	0.00721318	0.0344545	0.00118	0.0405062
KEGG_DRUG_METABOLISM_CYTOCHROME_P450	-0.265344	21	MGST3:130, FMO1:238, GSTO1:347, UGT1A1:376, FMO4:409, GSTZ1:667, MAOA:673, AOX1:717, MGST2:1133, MGST1:1315, GSTK1:1630, ADH5:2298, FMO5:2334, ALDH3B1:3852, MAOB:4251, ALDH3A1:5826, FMO2:6570, ALDH1A3:6641, CYP2E1:6895, GSTA4:8265, GSTO2:11125	2.59e-05	0.000465365	0.00129	0.0424371
REACTOME_NOTCH3_INTRACELLULAR_DOMAIN_REGULATES_TRANSCRIPTION	0.205855	21	SNW1:246, FABP7:394, KAT2A:626, MAML2:870, EP300:887, STAT1:977, HEY2:1133, NOTCH3:1655, HEYL:2376, MAML3:2481, WWC1:2870, IKZF1:3468, DLGAP5:3613, RBPJ:3830, HES5:6285, NOTCH1:8247, KAT2B:8758, HEY1:8867, CREBBP:9993, MAML1:10196, PLXND1:10620	0.00110051	0.00829001	0.00136	0.0429503
REACTOME_SULFUR_AMINO_ACID_METABOLISM	-0.219993	28	BHMT:15, GOT2:30, CBSL:93, MAT1A:98, GOT1:318, CBS:335, CTH:741, CDO1:769, BHMT2:929, SUOX:1004, MTR:1005, TXN2:1279, CSAD:1981, MTRR:2041, MRI1:2461, MTAP:2850, SQOR:3911, MPST:3912, AHCY:4414, ADI1:5042, ETHE1:5392, APIP:5627, GADL1:7965, TST:9073, ADO:9989, TSTD1:10139, ENOPH1:11358, SLC25A10:12860	5.69e-05	0.00081883	0.00159	0.0482827
KEGG_HYPERTROPHIC_CARDIOMYOPATHY_HCM	0.114593	69	TNNI3:308, CACNG4:535, ITGA8:616, ITGB7:631, CACNA2D3:642, ITGA3:792, DES:817, CACNA2D1:929, ITGA11:946, SGCA:949, IGF1:975, ITGA10:1079, SGCD:1083, ITGB6:1236, DAG1:1297, CACNA1F:1469, ITGB4:1555, TNF:1713, ITGB3:1814, CACNA2D4:1833, LAMA2:1986, LMNA:2496, ITGA9:2551, ITGA1:3158, CACNG5:3393, IL6:3479, TGFB2:3498, PRKAA2:3846, CACNA1C:4041, TGFB1:4293, SLC8A1:4323, RYR2:4369, SGCB:4393, DMD:4780…	0.00102567	0.00829001	0.00174	0.0496938
KEGG_STEROID_HORMONE_BIOSYNTHESIS	-0.273956	25	CYP1A1:43, HSD17B3:95, SULT1E1:134, HSD17B2:164, COMT:176, CYP11A1:267, CYP19A1:302, HSD17B8:345, UGT1A1:376, CYP7A1:761, CYP17A1:1034, SULT2B1:1507, SRD5A3:2018, HSD17B1:2174, CYP7B1:2179, CYP1B1:2604, HSD3B2:3739, HSD17B12:3904, SRD5A1:4894, HSD11B1:5667, HSD17B7:6075, AKR1D1:8096, CYP21A2:8234, HSD11B2:8395, SRD5A2:12526	2.16e-06	6e-05	0.00186	0.0496938
KEGG_CYSTEINE_AND_METHIONINE_METABOLISM	-0.191378	30	BHMT:15, GOT2:30, TAT:77, MAT1A:98, SDS:183, GOT1:318, CBS:335, CTH:741, CDO1:769, MTR:1005, MAT2B:1983, SRM:2057, DNMT3B:2500, MTAP:2850, LDHA:3461, MPST:3912, DNMT1:4136, AHCY:4414, ADI1:5042, TRDMT1:5357, APIP:5627, AHCYL2:5918, IL4I1:6222, AMD1:6337, DNMT3A:7315, DNMT3L:9367, LDHC:10238, ENOPH1:11358, SMS:11416, LDHB:11929	0.000289743	0.00325053	0.00188	0.0496938
KEGG_ARRHYTHMOGENIC_RIGHT_VENTRICULAR_CARDIOMYOPATHY_ARVC	0.133079	66	ACTN3:452, CACNG4:535, ITGA8:616, ITGB7:631, CACNA2D3:642, ITGA3:792, DES:817, CACNA2D1:929, ITGA11:946, SGCA:949, ITGA10:1079, SGCD:1083, ITGB6:1236, DAG1:1297, CACNA1F:1469, ITGB4:1555, ITGB3:1814, CACNA2D4:1833, LAMA2:1986, TCF7L1:2264, LMNA:2496, ITGA9:2551, JUP:2860, ITGA1:3158, CACNG5:3393, ACTN2:3581, CACNA1C:4041, SLC8A1:4323, RYR2:4369, SGCB:4393, DMD:4780, ITGA6:4854, CACNB4:4916, CACNA…	0.00019153	0.00233359	0.0019	0.0496938
REACTOME_SYNTHESIS_OF_PC	-0.157573	23	SLC44A2:168, SLC44A1:340, STARD10:368, PEMT:709, ABHD3:820, STARD7:1340, LPIN3:1606, PHOSPHO1:1812, MFSD2A:2545, SLC44A5:2549, LPCAT1:2596, CEPT1:4297, CHPT1:4705, SLC44A3:5129, SLC44A4:5388, CHAT:5720, CHKA:6617, LPIN2:6670, CHKB:7986, PCYT1A:8608, ACHE:10539, LPIN1:12866, BCHE:12939	0.00894924	0.0390439	0.00201	0.0496938
KEGG_PHENYLALANINE_METABOLISM	-0.275472	15	GOT2:30, TAT:77, MIF:83, GOT1:318, HPD:348, MAOA:673, AOC2:1596, PAH:1938, PRDX6:3392, ALDH3B1:3852, MAOB:4251, ALDH3A1:5826, IL4I1:6222, ALDH1A3:6641, DDC:9749	0.000222274	0.00258597	0.00209	0.0496938
REACTOME_TRANSPORT_OF_BILE_SALTS_AND_ORGANIC_ACIDS_METAL_IONS_AND_AMINE_COMPOUNDS	-0.147556	82	SLC14A2:1, SLC13A2:2, SLC6A19:29, SLC31A1:125, SLC6A20:151, SLC39A3:156, SLC44A2:168, SLC44A1:340, SLC6A12:353, SLC22A2:385, SLC22A7:459, SLC22A1:607, RUNX1:619, SLC5A11:658, SLC6A18:747, SLC41A1:903, RHAG:915, SLC6A6:920, SLC5A7:1138, SLC6A2:1180, SLC14A1:1348, SLC18A1:1538, SLC22A5:1572, SLC22A6:1920, SLC6A11:2093, SLC30A10:2180, SLC6A3:2219, SLC39A14:2330, SLC6A14:2369, SLC13A1:2398, SLC44A5:2…	4.12e-06	0.000103503	0.0021	0.0496938
KEGG_PROXIMAL_TUBULE_BICARBONATE_RECLAMATION	-0.224918	20	GLS2:10, GLUD1:57, ATP1A1:81, SLC9A3:201, PCK1:401, PCK2:569, CA4:575, MDH1:981, SLC38A3:2031, CA2:2048, SLC4A4:2198, ATP1B3:3391, AQP1:4120, ATP1B1:4483, ATP1B4:4546, ATP1A2:4884, ATP1B2:6065, ATP1A4:12220, GLS:12651, SLC25A10:12860	0.000501463	0.00492252	0.00214	0.0496938
KEGG_BETA_ALANINE_METABOLISM	-0.20578	21	ALDH1B1:26, ACADM:184, HIBCH:297, ALDH3A2:1123, GAD1:1450, ALDH2:1587, AOC2:1596, EHHADH:1602, MLYCD:1729, HADHA:1780, SRM:2057, GAD2:3600, ALDH7A1:4272, ABAT:4442, UPB1:5839, ECHS1:6305, ALDH9A1:6755, DPYD:7193, DPYS:8554, CNDP1:11234, SMS:11416	0.00110515	0.00829001	0.00233	0.05256
REACTOME_RECYCLING_OF_BILE_ACIDS_AND_SALTS	-0.296274	15	SLC51A:40, SLC10A2:79, RXRA:133, ABCB11:301, NR1H4:355, ALB:567, SLCO1A2:625, SLC27A5:1398, SLCO1B1:1746, SLC10A1:2623, NCOA2:3412, SLC51B:4056, ABCC3:5675, NCOA1:7902, STARD5:11942	7.15e-05	0.000977194	0.00265	0.0566149
REACTOME_TRANSPORT_OF_VITAMINS_NUCLEOSIDES_AND_RELATED_MOLECULES	-0.159436	35	SLC28A2:154, SLC29A2:519, SLCO1A2:625, SLC27A6:672, SLC27A4:770, SLC28A3:1475, SLCO1B1:1746, SLC25A4:1806, SLC29A4:1985, SLC35C1:2344, SLCO1C1:2655, SLC35B3:2739, SLC29A3:2993, SLCO4C1:3226, SLC35B2:3438, SLC33A1:3565, SLCO2B1:3772, APOD:4149, SLCO2A1:4266, SLC29A1:4294, SLC27A1:4438, SLC35A1:4463, SLC5A6:4765, SLC35A3:4855, SLC28A1:4993, SLC35D1:5060, SLC35A2:5426, SLCO4A1:5825, SLC16A2:7940, SL…	0.00111283	0.00829001	0.00274	0.0566149
REACTOME_METABOLISM_OF_LIPIDS	-0.0958051	611	ACAA2:16, ACOT13:28, SLC51A:40, FABP1:41, CYP1A1:43, ACOX2:71, SLC10A2:79, HSD17B3:95, ACSS3:100, HACD2:104, MOGAT2:116, RXRA:133, ACACA:137, ABCB4:143, CPT1A:152, HSD17B2:164, SLC44A2:168, ACADM:184, ACSL5:188, PNPLA7:203, PLA2G1B:207, DECR2:211, PLA2G4D:212, ENPP7:218, ACOT12:219, TMEM86B:229, ACADVL:235, GPAT3:247, PLA2G12A:253, TECRL:259, CYP11A1:267, GDE1:278, ACSL1:282, ABCB11:301, CYP19A1:…	2.94e-15	7.84e-13	0.00282	0.0566149
REACTOME_NA_CL_DEPENDENT_NEUROTRANSMITTER_TRANSPORTERS	-0.24445	19	SLC6A19:29, SLC6A20:151, SLC6A12:353, SLC22A2:385, SLC22A1:607, SLC6A18:747, SLC6A6:920, SLC6A2:1180, SLC18A1:1538, SLC6A11:2093, SLC6A3:2219, SLC6A14:2369, SLC6A1:2742, SLC6A7:5233, SLC6A9:7201, SLC18A2:8549, SLC6A5:8754, SLC6A13:9926, SLC6A15:10011	0.000227245	0.00259574	0.00289	0.0566149
REACTOME_TIGHT_JUNCTION_INTERACTIONS	-0.183431	28	CLDN16:3, CLDN15:279, CLDN18:576, CLDN19:578, PARD6B:698, CLDN23:888, CLDN9:889, PARD3:1185, CRB3:1186, CLDN2:1418, CLDN4:1754, CLDN3:1783, CLDN12:2017, CLDN6:2945, CLDN11:3070, CLDN17:3263, PRKCI:3358, F11R:5541, CLDN5:6015, CLDN14:6647, PATJ:6682, CLDN10:7606, PARD6G:8024, PARD6A:8546, CLDN1:9742, CLDN7:10587, CLDN8:10604, CLDN20:13553	0.000789578	0.0069866	0.00293	0.0566149
REACTOME_BILE_ACID_AND_BILE_SALT_METABOLISM	-0.204962	37	SLC51A:40, ACOX2:71, SLC10A2:79, RXRA:133, ABCB11:301, HSD17B4:321, NR1H4:355, ACOT8:442, ALB:567, SLCO1A2:625, CYP7A1:761, PTGIS:994, SLC27A2:1044, SLC27A5:1398, CYP46A1:1569, SLCO1B1:1746, SCP2:1771, CYP7B1:2179, AMACR:2464, SLC10A1:2623, OSBPL3:3005, CYP27A1:3205, NCOA2:3412, SLC51B:4056, CYP8B1:5101, ABCC3:5675, HSD3B7:6162, NCOA1:7902, AKR1D1:8096, OSBPL1A:8187, CYP39A1:8283, OSBP:8545, OSBP…	1.64e-05	0.00034367	0.00294	0.0566149
REACTOME_TRANSPORT_OF_INORGANIC_CATIONS_ANIONS_AND_AMINO_ACIDS_OLIGOPEPTIDES	-0.146573	100	SLC1A1:6, SLC26A3:24, SLC6A19:29, SLC12A1:31, SLC34A3:38, SLC5A12:65, SLC36A1:85, SLC43A1:89, SLC7A6:91, SLC7A9:114, SLC6A20:151, SLC4A1:180, SLC9A3:201, SLC9A4:213, SLC26A4:280, SLC6A12:353, SLC26A9:362, SLC38A4:396, SLC26A1:492, SLC7A11:510, SLC26A2:546, SLC26A7:577, SLC7A2:620, SLC12A3:660, SLC6A18:747, SLC6A6:920, SLC43A2:1014, SLC4A7:1136, SLC5A8:1269, SLC3A1:1544, SLC5A5:1612, SLC7A5:1725, …	4.51e-07	1.67e-05	0.00314	0.0590266
REACTOME_SYNTHESIS_OF_BILE_ACIDS_AND_BILE_SALTS	-0.182518	28	ACOX2:71, RXRA:133, ABCB11:301, HSD17B4:321, NR1H4:355, ACOT8:442, CYP7A1:761, PTGIS:994, SLC27A2:1044, SLC27A5:1398, CYP46A1:1569, SCP2:1771, CYP7B1:2179, AMACR:2464, OSBPL3:3005, CYP27A1:3205, NCOA2:3412, CYP8B1:5101, HSD3B7:6162, NCOA1:7902, AKR1D1:8096, OSBPL1A:8187, CYP39A1:8283, OSBP:8545, OSBPL2:8654, OSBPL6:11339, CH25H:11608, OSBPL9:12778	0.000838626	0.0072173	0.00334	0.0613261
KEGG_PROPANOATE_METABOLISM	-0.221615	30	ALDH1B1:26, ACSS3:100, ACACA:137, ACADM:184, HIBCH:297, ACACB:487, ALDH3A2:1123, ALDH2:1587, EHHADH:1602, MLYCD:1729, HADHA:1780, MMUT:1804, PCCA:2719, ACAT1:2817, ALDH6A1:3024, LDHA:3461, PCCB:3526, SUCLG1:4184, SUCLA2:4231, ALDH7A1:4272, ABAT:4442, SUCLG2:4573, MCEE:5480, ACSS2:6062, ECHS1:6305, ALDH9A1:6755, ACSS1:8430, ACAT2:8794, LDHC:10238, LDHB:11929	2.71e-05	0.000472144	0.00388	0.06585
REACTOME_ACYL_CHAIN_REMODELLING_OF_PG	-0.219303	15	PLA2G1B:207, PLA2G4D:212, PLA2G12A:253, LPGAT1:743, PLA2G2D:1623, CRLS1:1792, PLA2G4A:2565, LPCAT1:2596, PLA2G4F:3680, PLA2R1:3792, PLA2G2E:3918, PLA2G3:5401, PLA2G5:7329, PLA2G2F:9021, LPCAT4:13453	0.0032884	0.0196755	0.0039	0.06585
REACTOME_LDL_CLEARANCE	-0.207832	12	CLTA:695, LIPA:703, AP2A1:799, APOB:812, SOAT2:1431, NPC1:1550, SOAT1:3901, LSR:4187, LDLRAP1:4426, AP2A2:7539, NCEH1:7792, AP2M1:13266	0.0127019	0.0491635	0.0039	0.06585
REACTOME_ORGANIC_CATION_ANION_ZWITTERION_TRANSPORT	-0.263993	14	SLC22A2:385, SLC22A7:459, SLC22A1:607, RUNX1:619, SLC22A5:1572, SLC22A6:1920, SLC22A8:2564, SLC22A18:3232, SLC22A16:3357, SLC22A4:3644, SLC22A12:4206, RSC1A1:4467, SLC22A3:5065, SLC22A15:11925	0.000629372	0.00583711	0.00392	0.06585
KEGG_TRYPTOPHAN_METABOLISM	-0.222232	37	ALDH1B1:26, CYP1A1:43, ACMSD:49, AOC1:115, GCDH:291, HADH:322, MAOA:673, AOX1:717, CAT:723, HAAO:842, OGDHL:997, ALDH3A2:1123, IDO2:1336, ALDH2:1587, EHHADH:1602, HADHA:1780, KMO:1827, AADAT:1890, TPH2:2091, CYP1B1:2604, TPH1:2729, ACAT1:2817, WARS1:2825, KYNU:4175, MAOB:4251, ALDH7A1:4272, IL4I1:6222, ECHS1:6305, ALDH9A1:6755, TDO2:7818, ACAT2:8794, AANAT:9044, OGDH:9329, DDC:9749, AFMID:10056, …	2.98e-06	7.81e-05	0.00412	0.0677678
REACTOME_PROTEIN_PROTEIN_INTERACTIONS_AT_SYNAPSES	0.137144	75	SIPA1L1:349, EPB41L5:351, SYT9:389, DLG4:409, SYT1:462, DBNL:670, EPB41L2:672, HOMER2:674, DLG3:688, APBA1:729, SLITRK6:813, EPB41L1:831, PPFIBP1:855, PDLIM5:1197, LRRTM3:1364, GRIA1:1381, IL1RAPL1:1534, PTPRD:1616, NRXN1:1946, PPFIBP2:2195, SYT7:2294, SLITRK3:2359, LRRTM1:2563, SYT2:2695, SLITRK4:2804, SLITRK1:2810, NTRK3:2867, DLGAP4:2897, NLGN4X:2932, NLGN1:2997, PTPRF:3089, GRM5:3347, GRIA3:3…	4.22e-05	0.000662157	0.00465	0.0734868
KEGG_TYROSINE_METABOLISM	-0.181501	33	GOT2:30, TAT:77, MIF:83, COMT:176, GOT1:318, HPD:348, HGD:584, GSTZ1:667, MAOA:673, AOX1:717, LCMT2:894, AOC2:1596, ADH5:2298, TPO:2389, TH:2427, LCMT1:2547, TRMT11:3196, ALDH3B1:3852, MAOB:4251, HEMK1:4526, METTL2B:5746, ALDH3A1:5826, IL4I1:6222, DCT:6372, ALDH1A3:6641, FAH:7807, TYRP1:8286, METTL6:8389, DBH:9693, DDC:9749, TYR:10010, BUD23:12248, PNMT:13313	0.000312914	0.00338943	0.0047	0.0734868
REACTOME_SYNTHESIS_OF_BILE_ACIDS_AND_BILE_SALTS_VIA_27_HYDROXYCHOLESTEROL	-0.239053	11	RXRA:133, NR1H4:355, CYP7A1:761, PTGIS:994, CYP7B1:2179, CYP27A1:3205, NCOA2:3412, CYP8B1:5101, HSD3B7:6162, NCOA1:7902, AKR1D1:8096	0.00606009	0.0307034	0.0048	0.0734868
REACTOME_METABOLISM_OF_STEROIDS	-0.138358	126	SLC51A:40, ACOX2:71, SLC10A2:79, HSD17B3:95, RXRA:133, ACACA:137, HSD17B2:164, CYP11A1:267, ABCB11:301, CYP19A1:302, HSD17B4:321, VDR:342, NR1H4:355, CYP24A1:383, ACOT8:442, ACACB:487, ELOVL6:562, ALB:567, SLCO1A2:625, INSIG1:705, CYP7A1:761, PTGIS:994, CYP17A1:1034, SLC27A2:1044, FDXR:1200, SCD:1205, AKR1B1:1316, SLC27A5:1398, CYP2R1:1467, HMGCS1:1479, CYP46A1:1569, PLPP6:1619, SLCO1B1:1746, SCP…	9.38e-08	4.53e-06	0.00484	0.0734868
REACTOME_PHENYLALANINE_AND_TYROSINE_METABOLISM	-0.300534	10	TAT:77, QDPR:217, HPD:348, HGD:584, GSTZ1:667, KYAT1:1509, PAH:1938, IL4I1:6222, ASRGL1:7115, FAH:7807	0.0010019	0.00828212	0.0052	0.0774631
KEGG_FOCAL_ADHESION	0.0846325	165	SOS1:68, COL11A2:264, MYLK3:279, JUN:289, PDGFA:299, FLNA:307, CCND1:313, RELN:341, PDGFD:354, ACTN3:452, VEGFD:518, TLN1:604, ITGA8:616, ITGB7:631, ITGA3:792, RASGRF1:828, LAMA4:890, ITGA11:946, IGF1:975, CHAD:1063, ITGA10:1079, LAMB2:1195, DOCK1:1213, ITGB6:1236, PPP1CA:1332, COL5A2:1439, AKT1:1545, ITGB4:1555, ZYX:1607, CCND2:1645, BCAR1:1726, ITGB3:1814, LAMA2:1986, VEGFB:1990, PDGFB:2030, XI…	0.000193152	0.00233359	0.0057	0.0831157
REACTOME_ACYL_CHAIN_REMODELLING_OF_PI	-0.242506	13	PLA2G1B:207, PLA2G4D:212, PLA2G12A:253, PLA2G2D:1623, PLA2G4A:2565, PLA2G4E:3480, PLA2G4F:3680, PLA2R1:3792, PLA2G2E:3918, PLBD1:4216, MBOAT7:4419, PLA2G5:7329, PLA2G2F:9021	0.00247547	0.0157091	0.00579	0.0831157
KEGG_AXON_GUIDANCE	0.0928196	104	SEMA6C:50, RHOD:72, NTNG1:75, NTN4:99, EFNA3:186, ROBO3:205, ARHGEF12:209, SRGAP1:276, DPYSL5:287, L1CAM:693, ROBO1:703, NCK2:788, LIMK2:981, UNC5C:1024, SEMA3C:1343, EPHA2:1432, PPP3R2:1446, UNC5D:1798, NFATC2:1809, SEMA4B:1866, PPP3R1:2002, SEMA6D:2029, EPHB2:2058, PAK2:2085, SLIT3:2086, SEMA3D:2240, SEMA4G:2335, SEMA4D:2377, EPHB3:2430, ROCK1:2463, PLXNB1:2849, PPP3CC:2883, PLXNA2:3293, MAPK3:…	0.00112162	0.00829001	0.00599	0.0844513
KEGG_DILATED_CARDIOMYOPATHY	0.103098	73	TNNI3:308, CACNG4:535, ITGA8:616, ITGB7:631, CACNA2D3:642, ITGA3:792, DES:817, CACNA2D1:929, ITGA11:946, SGCA:949, IGF1:975, ITGA10:1079, SGCD:1083, ITGB6:1236, DAG1:1297, PRKACA:1458, CACNA1F:1469, ITGB4:1555, TNF:1713, ITGB3:1814, CACNA2D4:1833, LAMA2:1986, LMNA:2496, ITGA9:2551, ADCY5:3130, ITGA1:3158, CACNG5:3393, TGFB2:3498, CACNA1C:4041, PRKACB:4160, TGFB1:4293, SLC8A1:4323, RYR2:4369, SGCB…	0.00238381	0.0154394	0.00643	0.0884539
REACTOME_SLC_TRANSPORTER_DISORDERS	-0.130756	88	SLC1A1:6, SLC26A3:24, SLC6A19:29, SLC12A1:31, SLC34A3:38, SLC7A9:114, SLC6A20:151, SLC5A2:155, HK1:175, SLC4A1:180, SLC26A4:280, SLC26A2:546, SLC2A2:588, SLC12A3:660, SLC6A18:747, SLC27A4:770, RHAG:915, NDC1:995, SLC5A7:1138, SLC6A2:1180, SLC2A9:1523, NUP42:1526, SLC3A1:1544, SLC22A5:1572, SLC5A5:1612, AVPR2:1629, SLCO1B1:1746, NUP62:1757, SLC34A2:1814, SLC24A4:1982, SLC7A7:2004, SLC4A4:2198, SLC…	2.38e-05	0.000439386	0.00659	0.0884539
REACTOME_MAP2K_AND_MAPK_ACTIVATION	0.127408	27	IL17RD:324, IQGAP1:330, TLN1:604, KSR2:686, ITGB3:1814, WDR83:1865, ARRB2:2566, CSK:2891, VCL:2993, CNKSR2:3221, PEBP1:3234, MAPK3:3331, FN1:4253, FGB:4905, KSR1:5497, CNKSR1:5646, BRAF:5861, SRC:6424, ARRB1:7129, MARK3:8170, RAF1:8339, MAP2K2:8447, ARAF:8767, VWF:9908, LAMTOR2:10396, FGG:12853, ITGA2B:13358	0.0220536	0.0682517	0.00661	0.0884539
KEGG_DORSO_VENTRAL_AXIS_FORMATION	0.157146	17	SOS1:68, NOTCH2:493, PIWIL1:591, NOTCH4:716, NOTCH3:1655, PIWIL4:1728, PIWIL2:1918, CPEB1:2314, MAPK3:3331, EGFR:5182, SOS2:5992, ETS1:6310, ETV6:7543, NOTCH1:8247, ETS2:11618, SPIRE1:12396, SPIRE2:13054	0.0249583	0.0743125	0.00731	0.0961908
REACTOME_ACYL_CHAIN_REMODELLING_OF_PC	-0.193559	22	PLA2G1B:207, PLA2G4D:212, TMEM86B:229, PLA2G12A:253, PLB1:835, MBOAT2:841, LPCAT2:1198, PLA2G2D:1623, PLA2G4A:2565, LPCAT1:2596, PLA2G4E:3480, PLA2G4F:3680, PLA2R1:3792, PLA2G2E:3918, PLBD1:4216, PLA2G3:5401, LPCAT3:6006, PLA2G5:7329, PNPLA8:8027, PLA2G2F:9021, PLA2G6:11928, LPCAT4:13453	0.00168617	0.0113906	0.00809	0.10471
REACTOME_COPII_MEDIATED_VESICLE_TRANSPORT	0.10847	49	TBC1D20:12, PPP6C:127, NSF:311, USO1:356, TMED10:1137, NAPG:1145, GRIA1:1381, SEC31A:1766, CTSC:1829, SEC13:2080, LMAN2:2506, BET1:2680, GOSR2:2864, YKT6:3124, SEC22C:3138, SEC24A:3272, ANKRD28:3805, SEC23IP:3901, PREB:3936, STX17:4119, TGFA:4214, CSNK1D:4270, TRAPPC6A:4487, COL7A1:4632, PPP6R3:5127, PPP6R1:5197, STX5:5815, SEC24B:5862, LMAN1L:6005, TFG:6197, SCFD1:6340, LMAN2L:6843, NAPA:7112, A…	0.00873457	0.0387664	0.00837	0.105396
KEGG_TGF_BETA_SIGNALING_PATHWAY	0.12784	60	SMAD7:218, CDKN2B:241, BMPR1A:294, SMAD9:347, ID1:377, LEFTY2:521, ACVR2B:741, ACVR1C:858, EP300:887, ACVRL1:947, E2F4:1071, RPS6KB2:1201, TNF:1713, PPP2R1B:2051, GDF5:2259, INHBB:2278, TGFBR2:2415, ROCK1:2463, DCN:2602, PITX2:2655, THBS3:3254, MAPK3:3331, TGFB2:3498, INHBA:3685, NODAL:3917, BMP7:3972, LTBP1:4052, TGFB1:4293, BMP5:4367, BMPR1B:4733, MYC:5500, INHBE:5773, TGFBR1:6261, SMAD6:6401, …	0.000631797	0.00583711	0.00841	0.105396
REACTOME_PROTEIN_LOCALIZATION	-0.106615	129	AGXT:61, ACOX2:71, ABCD3:99, DECR2:211, LDHD:242, HSD17B4:321, PXMP4:352, TIMM23:369, ACOT8:442, ECI2:494, ACAA1:551, CS:644, LONP2:646, CAT:723, CHCHD4:758, ACO2:780, NUDT7:788, UBE2J2:793, EPHX2:856, PXMP2:876, CMC2:1006, SLC27A2:1044, AGPS:1052, ALDH3A2:1123, PEX16:1271, PIPOX:1304, ACOX1:1335, CHCHD7:1435, DAO:1497, EHHADH:1602, TIMM17A:1613, GSTK1:1630, MLYCD:1729, CYB5A:1763, SCP2:1771, SLC…	3.16e-05	0.000522641	0.00909	0.112138
REACTOME_CYTOSOLIC_IRON_SULFUR_CLUSTER_ASSEMBLY	-0.195382	12	NUBP1:262, CIAO1:316, ERCC2:395, BRIP1:1828, ABCB7:2327, RTEL1:3597, NUBP2:4298, CIAPIN1:4489, CIAO3:5168, POLD1:5632, NDOR1:10189, MMS19:10616	0.0191427	0.063241	0.00926	0.112477
KEGG_MTOR_SIGNALING_PATHWAY	0.121605	42	ULK3:113, VEGFD:518, RPTOR:865, IGF1:975, RPS6KB2:1201, RPS6KA2:1508, CAB39L:1509, AKT1:1545, VEGFB:1990, TSC1:2059, ULK1:2442, STRADA:3035, EIF4E1B:3314, MAPK3:3331, PIK3CG:3585, PRKAA2:3846, PIK3R5:4215, RPS6KA6:4250, DDIT4:4324, ULK2:4390, EIF4EBP1:4438, MTOR:5297, PRKAA1:5551, HIF1A:5650, PDPK1:5706, BRAF:5861, TSC2:6422, PIK3CB:6664, EIF4E:7427, STK11:7644, PIK3CD:7669, RPS6KA1:7980, PIK3R1:…	0.00647131	0.0322664	0.00959	0.114721
REACTOME_CYTOSOLIC_SULFONATION_OF_SMALL_MOLECULES	-0.222235	19	SULT1E1:134, PODXL2:411, SLC26A1:492, SULT1A2:541, SLC26A2:546, PAPSS2:599, BPNT1:976, SULT1A4:1121, SULT1A3:1174, SULT2B1:1507, SLC35B3:2739, SLC35B2:3438, SULT4A1:3627, TPST1:5394, ABHD14B:5628, BPNT2:6243, SULT6B1:11447, PAPSS1:12427, TPST2:12563	0.000803451	0.00701061	0.00984	0.115955
REACTOME_MITOCHONDRIAL_FATTY_ACID_BETA_OXIDATION	-0.262682	30	ACAA2:16, ACOT13:28, ACADM:184, ACOT12:219, ACADVL:235, HADH:322, THEM4:455, HADHB:796, MECR:1251, HADHA:1780, MMUT:1804, THEM5:2362, PCCA:2719, ECI1:2940, ACADS:3077, ACAD11:3153, MMAA:3258, ACOT7:3267, PCCB:3526, MCAT:3858, ACADL:4579, ACAD10:4644, DECR1:4854, MCEE:5480, ECHS1:6305, ACSM3:6359, ACOT9:6401, ACSF2:6475, NDUFAB1:7274, ACOT11:7431	6.54e-07	2.28e-05	0.01015	0.117849
REACTOME_MAPK_FAMILY_SIGNALING_CASCADES	0.0807563	241	PEA15:37, RAG1:60, SOS1:68, PAQR3:123, LRRC7:247, FOXO1:283, JUN:289, PDGFA:299, MMP2:303, IL17RD:324, IQGAP1:330, DLG4:409, DUSP16:470, SPTBN1:492, FGF5:526, HSPB1:559, TLN1:604, NCAM1:619, KLB:629, KSR2:686, DLG3:688, PSMF1:738, ICMT:750, BCL2L1:753, LYPLA1:786, RASGRF1:828, KBTBD7:846, KIT:982, DUSP7:993, PSMD1:1008, GFRA3:1222, PSMD13:1267, PRKACA:1458, KITLG:1544, DAB2IP:1625, FGF6:1648, RAG…	1.88e-05	0.00038105	0.01057	0.118147
REACTOME_SYNTHESIS_OF_VERY_LONG_CHAIN_FATTY_ACYL_COAS	-0.194167	24	HSD17B3:95, HACD2:104, ACSL5:188, TECRL:259, ACSL1:282, ELOVL7:454, ELOVL6:562, HACD3:782, ACSL6:1320, ACSL4:2244, ACSL3:2260, ELOVL1:2377, HSD17B12:3904, ELOVL3:4017, ACSBG1:4168, ACSBG2:4693, TECR:4735, ACSF3:5919, ELOVL5:7251, ELOVL2:8432, ELOVL4:9224, HACD4:10469, SLC27A3:12022, HACD1:13409	0.00100141	0.00828212	0.01098	0.118147
REACTOME_GLYCEROPHOSPHOLIPID_BIOSYNTHESIS	-0.0935051	110	SLC44A2:168, PLA2G1B:207, PLA2G4D:212, TMEM86B:229, GPAT3:247, PLA2G12A:253, SLC44A1:340, STARD10:368, DGAT2L6:499, GPAT4:534, CPNE3:564, PEMT:709, LPGAT1:743, HADHB:796, ABHD3:820, PLB1:835, MBOAT2:841, PISD:886, PLD2:992, PITPNM2:1109, LPCAT2:1198, GPD1L:1207, AGPAT2:1274, CDS1:1283, STARD7:1340, LPIN3:1606, PLA2G2D:1623, HADHA:1780, CRLS1:1792, PHOSPHO1:1812, GPAM:1941, MFSD2A:2545, SLC44A5:25…	0.000740131	0.00664263	0.01117	0.118147
REACTOME_SURFACTANT_METABOLISM	-0.205693	21	PGA3:21, PGA5:90, P2RY2:441, ADORA2A:476, ADRA2A:984, ZDHHC2:1095, ADGRF5:1107, CKAP4:1211, SLC34A2:1814, LMCD1:1962, SFTPC:2613, SLC34A1:3116, GATA6:3225, ADORA2B:4036, TTF1:5538, SFTPA2:6410, ABCA3:8014, SFTPA1:8643, CCDC59:8705, SFTPB:10060, CTSH:13550	0.00111053	0.00829001	0.01119	0.118147
REACTOME_NOTCH4_INTRACELLULAR_DOMAIN_REGULATES_TRANSCRIPTION	0.202857	16	SNW1:246, NOTCH2:493, KAT2A:626, NOTCH4:716, MAML2:870, EP300:887, HEY2:1133, MAML3:2481, RBPJ:3830, FLT4:4306, HES5:6285, NOTCH1:8247, KAT2B:8758, HEY1:8867, CREBBP:9993, MAML1:10196	0.00498543	0.0272354	0.01119	0.118147
REACTOME_METABOLISM_OF_VITAMINS_AND_COFACTORS	-0.110106	161	PNLIP:4, PDXK:19, RBP2:22, SLC23A1:48, PRSS3:51, CLPS:53, CTRC:66, COQ9:96, CD38:119, LPL:136, ACACA:137, PPCS:142, GPC6:159, SLC46A1:223, CBLIF:239, ABCD4:299, ABCC1:310, GSTO1:347, PC:469, ACACB:487, NAMPT:498, GPC3:508, BCO2:529, SLC22A13:653, MTHFD2:680, AOX1:717, LRP8:739, ENPP1:742, APOB:812, PLB1:835, SHMT2:864, PARP9:877, UBIAD1:931, PTGIS:994, MTR:1005, MCCC2:1010, GPC4:1017, AGRN:1226, …	1.65e-06	5.19e-05	0.01133	0.118147
REACTOME_FATTY_ACYL_COA_BIOSYNTHESIS	-0.169925	36	HSD17B3:95, HACD2:104, ACACA:137, ACSL5:188, TECRL:259, ACSL1:282, HSD17B8:345, ELOVL7:454, ELOVL6:562, HACD3:782, SCD:1205, ACSL6:1320, SLC25A1:1324, CBR4:1525, ACSL4:2244, ACSL3:2260, ACLY:2291, ELOVL1:2377, FASN:3048, MORC2:3554, HSD17B12:3904, ELOVL3:4017, ACSBG1:4168, ACSBG2:4693, TECR:4735, ACSF3:5919, ELOVL5:7251, ELOVL2:8432, ELOVL4:9224, HACD4:10469, HTD2:11775, SCD5:11804, SLC27A3:12022…	0.000425248	0.00430903	0.01158	0.118147
REACTOME_DISEASES_ASSOCIATED_WITH_O_GLYCOSYLATION_OF_PROTEINS	0.158586	54	ADAMTS10:322, ADAMTS7:362, ADAMTS19:364, NOTCH2:493, THSD4:511, SBSPON:517, ADAMTS4:711, NOTCH4:716, ADAMTS9:1026, THSD1:1044, ADAMTSL4:1169, DAG1:1297, POMT1:1568, NOTCH3:1655, LARGE1:1694, ADAMTS5:1755, ADAMTSL3:1779, ADAMTS6:2385, ADAMTS2:2412, ADAMTSL1:2435, ADAMTS3:2845, ADAMTSL5:2912, C1GALT1:3127, ADAMTS12:3470, POMGNT1:3869, LFNG:3930, MUC15:4003, ADAMTS17:4103, CFP:4658, SEMA5B:4970, B4G…	5.73e-05	0.00081883	0.01159	0.118147
REACTOME_CARNITINE_METABOLISM	-0.232579	14	RXRA:133, ACACA:137, CPT1A:152, ACACB:487, MID1IP1:848, SLC22A5:1572, PRKAB2:1750, PPARD:1850, CPT1B:2963, CPT2:3084, SLC25A20:5823, PRKAG2:8001, PRKAA2:10067, THRSP:13585	0.00259683	0.0163145	0.01166	0.118147
REACTOME_NEUREXINS_AND_NEUROLIGINS	0.139391	46	SIPA1L1:349, EPB41L5:351, SYT9:389, DLG4:409, SYT1:462, DBNL:670, EPB41L2:672, HOMER2:674, DLG3:688, APBA1:729, EPB41L1:831, PDLIM5:1197, LRRTM3:1364, NRXN1:1946, SYT7:2294, LRRTM1:2563, SYT2:2695, DLGAP4:2897, NLGN4X:2932, NLGN1:2997, GRM5:3347, DLGAP1:3518, DLGAP2:3645, NRXN3:3825, EPB41L3:3997, APBA2:4033, SHANK2:5181, GRIN2B:5186, SHARPIN:7044, DLG2:7100, DLGAP3:7277, NLGN2:7384, GRIN2C:7465,…	0.00109229	0.00829001	0.012	0.118147
REACTOME_SIGNALING_BY_NODAL	0.216004	14	LEFTY2:521, ACVR2B:741, ACVR1C:858, FOXO3:1729, ACVR1B:2453, FURIN:2846, MAPK3:3331, PCSK6:3626, NODAL:3917, CER1:4656, GDF1:5189, FOXH1:5756, DRAP1:8077, DAND5:13330	0.00515502	0.0279191	0.01216	0.118147
KEGG_NOD_LIKE_RECEPTOR_SIGNALING_PATHWAY	0.111956	40	TRAF6:240, IL18:459, MAPK13:512, CHUK:925, PSTPIP1:1293, TNF:1713, TAB3:1772, XIAP:2084, MAPK9:2446, BIRC3:2485, NFKBIB:2660, MAPK3:3331, IL6:3479, SUGT1:3551, TAB1:3932, NOD2:4173, NFKBIA:4373, ERBIN:5093, PYCARD:5118, NFKB1:5375, MAPK10:5583, BIRC2:5672, NOD1:5783, TNFAIP3:5855, CASP1:6232, IKBKB:6478, TRIP6:6602, CCL5:6822, RIPK2:7017, CXCL8:7025, MAPK11:7054, CARD9:8259, TAB2:9060, IL1B:9863,…	0.0144159	0.0529632	0.01227	0.118147
KEGG_ALANINE_ASPARTATE_AND_GLUTAMATE_METABOLISM	-0.206675	30	GLS2:10, GOT2:30, GLUD1:57, AGXT:61, GOT1:318, ADSS2:373, GFPT1:392, CPS1:563, ALDH4A1:1033, ASS1:1096, AGXT2:1103, GAD1:1450, ADSL:1610, ALDH5A1:1789, GPT:2099, PPAT:2822, CAD:3025, GAD2:3600, ABAT:4442, ADSS1:4673, ASL:5377, GPT2:5713, DDO:6159, IL4I1:6222, NIT2:7174, ASNS:7254, ASPA:11987, GLUL:12015, GLS:12651, GFPT2:13852	9.08e-05	0.00121344	0.01231	0.118147
REACTOME_DISEASES_OF_SIGNAL_TRANSDUCTION_BY_GROWTH_FACTOR_RECEPTORS_AND_SECOND_MESSENGERS	0.0702704	317	SOS1:68, GTF2F1:173, ATIC:210, SNW1:246, FOXO1:283, PDGFA:299, IQGAP1:330, DUSP16:470, STAT5A:471, SPTBN1:492, FGF5:526, NEURL1:528, TLN1:604, KAT2A:626, KLB:629, HDAC5:659, KSR2:686, PSMF1:738, BCL2L1:753, MSN:765, PPFIBP1:855, MAML2:870, EP300:887, CHUK:925, STAT1:977, KIT:982, DUSP7:993, PSMD1:1008, PPM1B:1065, HEY2:1133, TBL1X:1148, KIAA1549:1191, RPS6KB2:1201, CD28:1251, PSMD13:1267, SQSTM1:…	2.14e-05	0.000420345	0.01243	0.118147
REACTOME_SEMA4D_INDUCED_CELL_MIGRATION_AND_GROWTH_CONE_COLLAPSE	0.168026	16	ARHGEF12:209, LIMK2:981, RHOC:1638, MYH14:2277, SEMA4D:2377, ROCK1:2463, PLXNB1:2849, MYH9:3500, ARHGEF11:4013, MYH10:4182, ERBB2:5718, LIMK1:6694, ROCK2:7392, MYL6:8500, RND1:9291, MYH11:13876	0.0200272	0.0643018	0.01256	0.118147
REACTOME_ENDOGENOUS_STEROLS	-0.172046	23	RXRA:133, CYP11A1:267, CYP19A1:302, NR1H4:355, CYP7A1:761, PTGIS:994, FDXR:1200, CYP46A1:1569, CYP7B1:2179, CYP1B1:2604, CYP27A1:3205, CYP4V2:3376, NCOA2:3412, PDCD6-AHRR:3707, CYP8B1:5101, AHRR:6375, NCOA1:7902, CYP21A2:8234, CYP39A1:8283, CYP51A1:8317, ARNT:8646, FDX2:11605, ARNT2:13278	0.00431608	0.0250298	0.01257	0.118147
KEGG_METABOLISM_OF_XENOBIOTICS_BY_CYTOCHROME_P450	-0.210808	19	CYP1A1:43, MGST3:130, GSTO1:347, UGT1A1:376, GSTZ1:667, MGST2:1133, MGST1:1315, GSTK1:1630, ADH5:2298, CYP1B1:2604, CYP2S1:2987, ALDH3B1:3852, ALDH3A1:5826, ALDH1A3:6641, CYP2E1:6895, GSTA4:8265, DHDH:8661, EPHX1:8991, GSTO2:11125	0.00147649	0.0104224	0.01281	0.118967
KEGG_VALINE_LEUCINE_AND_ISOLEUCINE_DEGRADATION	-0.232901	43	ACAA2:16, ACADSB:17, ALDH1B1:26, ACADM:184, HIBCH:297, HADH:322, ACAA1:551, AOX1:717, HADHB:796, ACAD8:871, OXCT1:918, MCCC2:1010, ALDH3A2:1123, AUH:1328, HMGCS1:1479, ALDH2:1587, EHHADH:1602, HADHA:1780, MMUT:1804, DLD:1875, PCCA:2719, ACAT1:2817, ALDH6A1:3024, ACADS:3077, HIBADH:3152, PCCB:3526, MCCC1:4034, ALDH7A1:4272, BCAT2:4312, ABAT:4442, MCEE:5480, IL4I1:6222, ECHS1:6305, ALDH9A1:6755, BC…	1.32e-07	5.91e-06	0.01307	0.118967
REACTOME_UPTAKE_AND_ACTIONS_OF_BACTERIAL_TOXINS	0.139762	19	SYT1:462, VAMP1:1320, TXNRD1:2048, PDZD3:2122, SYT2:2695, FURIN:2846, ANTXR2:2877, MAP2K7:3060, SV2C:3591, CD9:4829, ANTXR1:5398, MAP2K6:5913, MAP2K3:5940, SV2A:6577, SV2B:6653, PDCD6IP:7520, MAP2K2:8447, HSP90AA1:11805, HBEGF:13854	0.0350481	0.0917449	0.01323	0.118967
REACTOME_ARACHIDONIC_ACID_METABOLISM	-0.155702	37	CYP1A1:43, ABCC1:310, PTGS1:351, CYP4B1:477, PON3:598, GGT1:639, PTGR1:665, PON1:831, EPHX2:856, TBXAS1:882, PTGIS:994, PTGES2:2184, ALOX12B:2380, GPX1:2383, PLA2G4A:2565, CYP1B1:2604, PTGR2:3626, PTGES:3816, ALOXE3:4522, DPEP3:4749, GPX2:4887, CYP8B1:5101, DPEP1:5396, HPGDS:5535, LTC4S:6188, CYP2U1:6441, AWAT1:6611, FAAH:7170, HPGD:7845, ALOX5:8251, PON2:8696, GGT5:8913, MAPKAPK2:10639, PTGS2:10…	0.0010631	0.00829001	0.01326	0.118967
REACTOME_DOWNSTREAM_SIGNALING_OF_ACTIVATED_FGFR1	0.141947	22	SOS1:68, FGF5:526, FLRT3:570, FLRT1:994, FGF6:1648, FGF1:1663, GAB1:2432, FGFR1:3154, FRS3:3736, SHC1:3918, KL:4047, FGF10:4145, FRS2:5970, PLCG1:6351, FGF23:7193, FGF17:7610, FLRT2:7997, FGF20:8252, PIK3R1:8583, FGF22:9642, FGF4:10685, PTPN11:13462	0.0212709	0.0668167	0.01371	0.121623
REACTOME_TRAFFICKING_OF_AMPA_RECEPTORS	0.184068	22	GRIP1:153, NSF:311, DLG4:409, CACNG4:535, AP2M1:647, EPB41L1:831, GRIA1:1381, CAMK2B:2103, MDM2:2203, GRIA3:3365, PRKCA:3376, CAMK2A:4284, PRKCG:5085, TSPAN7:5428, DLG1:5494, AP2A2:6374, PICK1:6377, PRKCB:6560, GRIP2:9527, MYO6:10354, GRIA2:11534, AP2A1:13114	0.0028212	0.0175486	0.01415	0.124131
REACTOME_ELEVATION_OF_CYTOSOLIC_CA2_LEVELS	0.186042	16	TRPC6:253, P2RX6:825, TRPC7:2487, P2RX5:3091, ITPR2:3244, ITPR3:3267, P2RX1:3598, ORAI1:3797, P2RX7:3943, P2RX4:4205, TRPC3:4588, P2RX3:4783, ORAI2:5352, ITPR1:7081, STIM1:10328, P2RX2:11362	0.0100179	0.0416801	0.01431	0.124155
KEGG_PYRUVATE_METABOLISM	-0.165162	37	ALDH1B1:26, ACACA:137, GRHPR:160, ACOT12:219, LDHD:242, PCK1:401, PC:469, ACACB:487, PCK2:569, ME1:966, MDH1:981, ALDH3A2:1123, AKR1B1:1316, PKM:1573, ALDH2:1587, DLD:1875, PKLR:2507, ACAT1:2817, LDHA:3461, ALDH7A1:4272, GLO1:4406, ACYP2:5643, HAGH:5766, PDHA2:5890, ACSS2:6062, ALDH9A1:6755, DLAT:7356, ACYP1:7451, ME2:7667, ACSS1:8430, PDHB:8578, ACAT2:8794, LDHC:10238, ME3:10946, LDHB:11929, PDH…	0.000516311	0.0049903	0.01461	0.12538
REACTOME_SIGNALING_BY_TGFB_FAMILY_MEMBERS	0.120439	74	SMAD7:218, CDKN2B:241, SNW1:246, BMPR1A:294, CCNT2:343, SMAD9:347, WWTR1:640, TRIM33:717, ACVR2B:741, ACVR1C:858, TGIF1:931, ACVRL1:947, E2F4:1071, FSTL1:1274, PPP1CA:1332, TGIF2:1507, SKIL:1653, CGN:2027, PMEPA1:2166, INHBB:2278, TGFBR2:2415, ACVR1B:2453, CBL:2732, GDF2:2782, CCNT1:2790, FURIN:2846, JUNB:3294, MAPK3:3331, NEDD4L:3514, INHBA:3685, TGFB1:4293, CER1:4656, GREM2:4717, BMPR1B:4733, S…	0.000353392	0.003763	0.01481	0.12573
REACTOME_OXIDATIVE_STRESS_INDUCED_SENESCENCE	0.134518	48	PHC1:62, CDKN2B:241, JUN:289, PHC3:317, TNIK:561, MAPKAPK3:648, EZH2:657, PHC2:1339, MDM2:2203, CBX2:2343, CDKN2A:2404, MAPK9:2446, MDM4:2509, RBBP7:2894, MAP2K7:3060, CDKN2D:3161, MAPKAPK2:3274, MAPK3:3331, MOV10:3363, TNRC6C:3368, SCMH1:3445, AGO1:3769, MINK1:4035, E2F1:4104, TXN:4518, TNRC6B:4725, KDM6B:4805, CBX8:5126, CDKN2C:5446, MAPK10:5583, MAP2K6:5913, MAP2K3:5940, TFDP2:6107, MAPK11:705…	0.00128714	0.00929474	0.01531	0.128592
REACTOME_METABOLISM_OF_WATER_SOLUBLE_VITAMINS_AND_COFACTORS	-0.11472	105	PDXK:19, SLC23A1:48, PRSS3:51, CTRC:66, CD38:119, ACACA:137, PPCS:142, SLC46A1:223, CBLIF:239, ABCD4:299, ABCC1:310, GSTO1:347, PC:469, ACACB:487, NAMPT:498, SLC22A13:653, MTHFD2:680, AOX1:717, ENPP1:742, SHMT2:864, PARP9:877, PTGIS:994, MTR:1005, MCCC2:1010, SLC5A8:1269, ENPP3:1465, CYB5A:1763, MMUT:1804, CYB5R3:1836, SLC25A32:1960, NUDT12:2007, ACP5:2014, MTRR:2041, NFS1:2086, MOCOS:2168, SLC19…	5.21e-05	0.000779691	0.01553	0.129067
KEGG_GAP_JUNCTION	0.0947771	57	SOS1:68, PDGFA:299, PDGFD:354, PRKACA:1458, PDGFB:2030, TJP1:2036, TUBB1:2046, GUCY1A1:2097, PDGFC:2370, DRD2:2863, ADCY5:3130, EGF:3209, PRKG2:3237, ITPR2:3244, ITPR3:3267, PDGFRA:3316, MAPK3:3331, GRM5:3347, PRKCA:3376, PLCB1:3536, PDGFRB:3745, PLCB4:3890, HTR2C:4037, PRKACB:4160, CSNK1D:4270, LPAR1:4290, ADCY2:4685, GJD2:4927, PRKCG:5085, EGFR:5182, GJA1:5502, SOS2:5992, SRC:6424, MAP3K2:6435,…	0.0135109	0.0505248	0.01586	0.130437
REACTOME_LYSINE_CATABOLISM	-0.228977	12	GCDH:291, AASS:1285, PIPOX:1304, SLC25A21:1776, DLD:1875, AADAT:1890, CRYM:2539, PHYKPL:3054, ALDH7A1:4272, DLST:6829, HYKK:8921, OGDH:9329	0.00604085	0.0307034	0.0164	0.133414
REACTOME_CREB1_PHOSPHORYLATION_THROUGH_NMDA_RECEPTOR_MEDIATED_ACTIVATION_OF_RAS_SIGNALING	0.170192	19	LRRC7:247, DLG4:409, DLG3:688, RASGRF1:828, RPS6KA2:1508, RASGRF2:1752, CAMK2B:2103, MAPK3:3331, ACTN2:3581, RPS6KA6:4250, CAMK2A:4284, GRIN2B:5186, DLG1:5494, PDPK1:5706, DLG2:7100, RPS6KA1:7980, GRIN1:9078, NEFL:12560, GRIN2D:13553	0.0102664	0.0422337	0.01656	0.133414
REACTOME_SIGNALING_BY_FGFR	0.11038	49	SOS1:68, GTF2F1:173, FGF5:526, FLRT3:570, KLB:629, FLRT1:994, POLR2F:1548, HNRNPM:1553, FGF6:1648, FGF1:1663, GAB1:2432, CBL:2732, FGFR1:3154, ESRP2:3238, MAPK3:3331, FGFR2:3453, ESRP1:3532, SPRY2:3622, FRS3:3736, NCBP1:3785, SHC1:3918, KL:4047, FGF10:4145, FGF19:4437, FGFR4:5100, RBFOX2:5830, BRAF:5861, FRS2:5970, PLCG1:6351, SRC:6424, FGF23:7193, GALNT3:7355, FGFR3:7586, FGF17:7610, FGFRL1:7752…	0.00762038	0.0355122	0.01676	0.133661
REACTOME_MYD88_INDEPENDENT_TLR4_CASCADE	0.101496	66	AGER:206, TRAF6:240, JUN:289, RIPK1:369, MAPKAPK3:648, MEF2A:892, TICAM2:899, CHUK:925, DUSP7:993, RPS6KA5:1493, RPS6KA2:1508, TAB3:1772, S100A12:1922, PPP2R1B:2051, ATF1:2221, MAPK9:2446, BIRC3:2485, NFKBIB:2660, PPP2R5D:2802, MAP2K7:3060, MAPKAPK2:3274, MAPK3:3331, DUSP4:3802, TAB1:3932, VRK3:4155, NOD2:4173, NFKBIA:4373, TANK:4888, TNIP2:5289, NFKB1:5375, TRAF3:5397, RIPK3:5541, MAPK10:5583, B…	0.00444498	0.0251963	0.01723	0.136036
REACTOME_SEMA4D_IN_SEMAPHORIN_SIGNALING	0.152465	18	ARHGEF12:209, LIMK2:981, RHOC:1638, MYH14:2277, SEMA4D:2377, ROCK1:2463, PLXNB1:2849, MYH9:3500, ARHGEF11:4013, MYH10:4182, MET:4975, ERBB2:5718, LIMK1:6694, ROCK2:7392, MYL6:8500, RRAS:8550, RND1:9291, MYH11:13876	0.0252085	0.0743527	0.01758	0.137161
REACTOME_SIGNALING_BY_FGFR2_IN_DISEASE	0.144484	19	SOS1:68, GTF2F1:173, FGF5:526, POLR2F:1548, FGF6:1648, FGF1:1663, GAB1:2432, FGFR2:3453, NCBP1:3785, FGF10:4145, FRS2:5970, PLCG1:6351, FGF23:7193, FGF17:7610, FGF20:8252, PIK3R1:8583, FGF22:9642, FGF4:10685, FGF7:12911	0.0293306	0.0808311	0.01772	0.137161
REACTOME_INTRACELLULAR_SIGNALING_BY_SECOND_MESSENGERS	0.0785895	229	PHC1:62, ATN1:95, TRAF6:240, FOXO1:283, JUN:289, PDGFA:299, CAMKK2:305, PHC3:317, FGF5:526, KLB:629, EZH2:657, HDAC5:659, PSMF1:738, KPNA2:740, RPTOR:865, NBEA:894, CHUK:925, KIT:982, PSMD1:1008, RPS6KB2:1201, CD28:1251, PSMD13:1267, PHC2:1339, PRKACA:1458, KITLG:1544, AKT1:1545, RRAGD:1605, USP13:1634, FGF6:1648, FGF1:1663, PDE1B:1669, FRK:1676, HDAC7:1718, FOXO3:1729, OTUD3:1881, PIP4K2C:1950, …	4.87e-05	0.000745816	0.01847	0.140594
REACTOME_HIV_ELONGATION_ARREST_AND_RECOVERY	0.167981	16	GTF2F1:173, CCNT2:343, NELFE:644, POLR2F:1548, TCEA1:2514, CCNT1:2790, SUPT5H:3595, NELFB:3978, NELFCD:4291, ELL:5778, ELOA:6303, CTDP1:6581, SUPT16H:7406, SSRP1:8439, CCNK:10527, NELFA:11217	0.0200609	0.0643018	0.01863	0.140594
REACTOME_PEROXISOMAL_LIPID_METABOLISM	-0.292409	25	ACOX2:71, DECR2:211, HSD17B4:321, ACOT8:442, ECI2:494, ACAA1:551, NUDT7:788, SLC27A2:1044, ALDH3A2:1123, ACOX1:1335, EHHADH:1602, MLYCD:1729, SCP2:1771, CRAT:1898, NUDT19:1945, PECR:2371, AMACR:2464, HACL1:3654, SLC25A17:3711, ACBD5:4563, PHYH:5255, CROT:5892, ACOX3:6496, HAO2:6956, ABCD1:12173	4.27e-07	1.67e-05	0.01873	0.140594
REACTOME_MAPK_TARGETS_NUCLEAR_EVENTS_MEDIATED_BY_MAP_KINASES	0.178751	21	JUN:289, MEF2A:892, DUSP7:993, RPS6KA5:1493, RPS6KA2:1508, PPP2R1B:2051, ATF1:2221, MAPK9:2446, PPP2R5D:2802, MAPKAPK2:3274, MAPK3:3331, DUSP4:3802, VRK3:4155, MAPK10:5583, ELK1:6665, MAPK11:7054, RPS6KA1:7980, ATF2:8004, MAPK7:8851, FOS:11379, DUSP3:11999	0.00459988	0.0258023	0.01914	0.140594
REACTOME_OPIOID_SIGNALLING	0.112385	55	CAMKK2:305, KPNA2:740, GNA14:818, NBEA:894, OPRM1:1088, PPP1CA:1332, PRKACA:1458, GNAT3:1557, PDE1B:1669, PPP3R1:2002, PDE4D:2022, PPP2R1B:2051, CAMK2B:2103, PDE4C:2460, GRK2:2791, PPP2R5D:2802, PPP3CC:2883, ADCY5:3130, ITPR2:3244, ITPR3:3267, PRKCA:3376, PLCB1:3536, GNB3:3638, PLCB4:3890, GNAL:4154, PRKACB:4160, CAMK2A:4284, ADCY2:4685, PPP1R1B:4941, PRKCG:5085, PRKAR2B:5319, PDE1A:5732, CAMKK1:…	0.00400951	0.0235417	0.01918	0.140594
REACTOME_TOLL_LIKE_RECEPTOR_9_TLR9_CASCADE	0.0927523	66	AGER:206, TRAF6:240, JUN:289, MAPKAPK3:648, MEF2A:892, TICAM2:899, CHUK:925, DUSP7:993, EEA1:1489, RPS6KA5:1493, RPS6KA2:1508, TAB3:1772, S100A12:1922, PPP2R1B:2051, ATF1:2221, MAPK9:2446, NFKBIB:2660, IRAK4:2798, PPP2R5D:2802, MAP2K7:3060, MAPKAPK2:3274, MAPK3:3331, DUSP4:3802, TAB1:3932, VRK3:4155, NOD2:4173, NFKBIA:4373, PIK3R4:5045, TNIP2:5289, NFKB1:5375, PIK3C3:5391, MAPK10:5583, NOD1:5783,…	0.00933174	0.0398818	0.01938	0.140594
REACTOME_UREA_CYCLE	-0.25388	10	NAGS:20, SLC25A15:220, CPS1:563, ASS1:1096, ARG1:1461, NMRAL1:3038, OTC:4780, ASL:5377, ARG2:7317, SLC25A2:9017	0.00544832	0.028524	0.01941	0.140594
REACTOME_PENTOSE_PHOSPHATE_PATHWAY	0.204849	11	TKT:1160, RPIA:1854, RBKS:1964, SHPK:2681, PRPS1:2706, DERA:3239, G6PD:3895, PGD:4813, PGLS:5168, TALDO1:5228, PGM2:13789	0.0186816	0.0625544	0.0197	0.141397
REACTOME_RA_BIOSYNTHESIS_PATHWAY	-0.16712	15	ALDH1A1:165, CYP26C1:553, DHRS9:785, DHRS4:2075, RDH5:2160, ALDH1A2:3333, SDR16C5:4411, ALDH8A1:4490, RDH14:5614, CYP26B1:5973, ALDH1A3:6641, CYP26A1:6914, DHRS3:7067, RDH13:8262, RDH11:8543	0.0250924	0.0743527	0.02008	0.142826
REACTOME_MITOCHONDRIAL_FATTY_ACID_BETA_OXIDATION_OF_SATURATED_FATTY_ACIDS	-0.31167	10	ACADM:184, ACADVL:235, HADH:322, HADHB:796, MECR:1251, HADHA:1780, ACADS:3077, ACADL:4579, ECHS1:6305, ACSM3:6359	0.000645135	0.00587396	0.02082	0.145927
REACTOME_SYNTHESIS_OF_GLYCOSYLPHOSPHATIDYLINOSITOL_GPI	-0.190925	16	PIGO:286, PIGZ:516, DPM2:537, PIGG:656, PIGP:784, PIGW:1194, PIGF:1528, PIGL:2094, PIGA:3719, PIGX:4304, PIGB:5868, PIGV:6368, PIGN:6573, PIGC:8902, PIGH:9991, PIGM:13247	0.00822208	0.0371618	0.02125	0.145927
REACTOME_SIGNALING_BY_ALK	0.138503	21	PTPN6:228, PTN:596, EP300:887, CD274:1411, ALK:1803, PTPRZ1:2778, IRS1:3116, SHC1:3918, PRDM1:4000, MYC:5500, HIF1A:5650, FRS2:5970, PLCG1:6351, SRC:6424, IL2RG:6638, PIK3CB:6664, SIN3A:7146, PIK3R1:8583, MYCN:8950, PIK3R2:10257, JAK3:11948	0.0281113	0.079913	0.02136	0.145927
REACTOME_PEROXISOMAL_PROTEIN_IMPORT	-0.194225	52	AGXT:61, ACOX2:71, DECR2:211, HSD17B4:321, ACOT8:442, ECI2:494, ACAA1:551, LONP2:646, CAT:723, NUDT7:788, EPHX2:856, SLC27A2:1044, AGPS:1052, PIPOX:1304, ACOX1:1335, DAO:1497, EHHADH:1602, GSTK1:1630, MLYCD:1729, SCP2:1771, CRAT:1898, NUDT19:1945, DHRS4:2075, TYSND1:2289, PECR:2371, AMACR:2464, PEX7:3164, MPV17:3250, ECH1:3442, HACL1:3654, GNPAT:4632, PHYH:5255, PEX6:5268, NOS2:5294, PEX2:5390, P…	1.32e-06	4.38e-05	0.02139	0.145927
REACTOME_ORGANIC_CATION_TRANSPORT	-0.239429	10	SLC22A2:385, SLC22A1:607, RUNX1:619, SLC22A5:1572, SLC22A18:3232, SLC22A16:3357, SLC22A4:3644, RSC1A1:4467, SLC22A3:5065, SLC22A15:11925	0.00876552	0.0387664	0.02144	0.145927
REACTOME_SHC_MEDIATED_CASCADE_FGFR4	0.175139	11	SOS1:68, KLB:629, FGF6:1648, FGF1:1663, SHC1:3918, FGF19:4437, FGFR4:5100, FGF23:7193, FGF17:7610, FGF20:8252, FGF4:10685	0.0443546	0.101307	0.02258	0.148125
REACTOME_SMAD2_SMAD3_SMAD4_HETEROTRIMER_REGULATES_TRANSCRIPTION	0.157495	20	SMAD7:218, CDKN2B:241, CCNT2:343, WWTR1:640, TGIF1:931, E2F4:1071, TGIF2:1507, CCNT1:2790, JUNB:3294, MAPK3:3331, MYC:5500, TFDP2:6107, RNF111:6477, SERPINE1:7071, E2F5:7383, TFDP1:7968, RBL1:9957, CCNK:10527, SP1:10757, MEN1:11737	0.0148179	0.054006	0.02259	0.148125
REACTOME_DOWNSTREAM_SIGNAL_TRANSDUCTION	0.133025	21	SOS1:68, PDGFA:299, STAT5A:471, NCK2:788, STAT1:977, BCAR1:1726, PDGFB:2030, PDGFRA:3316, PDGFRB:3745, STAT6:5759, STAT5B:6114, PLCG1:6351, SRC:6424, PIK3CB:6664, RASA1:7928, NCK1:7981, GRB7:8329, PIK3R1:8583, RAPGEF1:8874, PIK3R2:10257, PTPN11:13462	0.0349539	0.0917449	0.02263	0.148125
KEGG_GLYCEROLIPID_METABOLISM	-0.11893	46	PNLIP:4, PNLIPRP2:9, ALDH1B1:26, LPL:136, GPAT3:247, GPAT4:534, PNLIPRP1:676, MBOAT2:841, ALDH3A2:1123, AGPAT2:1274, AKR1B1:1316, ALDH2:1587, GPAM:1941, DGKQ:2336, DGKE:2614, LIPG:2664, GLYCTK:2805, DGKA:2831, DGAT2:2885, MGLL:3227, DGKD:3465, LIPC:3908, AGPAT3:3998, ALDH7A1:4272, DGKH:4289, GPAT2:4366, DGKG:4389, GK:4441, GLA:5841, PLPP3:6150, DGKB:6610, ALDH9A1:6755, MBOAT1:8386, DGKI:9072, LCL…	0.00533213	0.0281503	0.02266	0.148125
REACTOME_ALK_MUTANTS_BIND_TKIS	0.190504	10	PPM1B:1065, ALK:1803, STRN:2533, EML4:4044, BIRC6:4069, FN1:4253, NPM1:4308, HIP1:4751, PRKAR1A:8036, EIF2AK3:9637	0.0370263	0.0938244	0.02275	0.148125
REACTOME_SHC_MEDIATED_CASCADE_FGFR1	0.16405	13	SOS1:68, FGF5:526, FGF6:1648, FGF1:1663, FGFR1:3154, SHC1:3918, KL:4047, FGF10:4145, FGF23:7193, FGF17:7610, FGF20:8252, FGF22:9642, FGF4:10685	0.0406339	0.0985538	0.02309	0.148125
KEGG_LYSINE_DEGRADATION	-0.11217	41	ALDH1B1:26, GCDH:291, HADH:322, BBOX1:777, OGDHL:997, ALDH3A2:1123, AASS:1285, PIPOX:1304, ALDH2:1587, EHHADH:1602, NSD1:1706, HADHA:1780, AADAT:1890, EHMT1:2196, NSD2:2776, ACAT1:2817, KMT5C:2896, ALDH7A1:4272, SETD1A:5120, SETDB1:5253, ASH1L:5640, KMT5B:5815, SETDB2:6185, DOT1L:6236, ECHS1:6305, SETD1B:6419, SUV39H1:6719, ALDH9A1:6755, DLST:6829, SUV39H2:7880, AASDH:8629, ACAT2:8794, PLOD3:9035…	0.0130754	0.0497063	0.02337	0.148125
REACTOME_CLEC7A_DECTIN_1_SIGNALING	0.087255	63	MAP3K14:31, TRAF6:240, BCL10:309, PSMF1:738, CLEC7A:796, CHUK:925, PSMD1:1008, PSMD13:1267, UBA3:1404, TAB3:1772, NFATC2:1809, CARD11:1830, PPP3R1:2002, PSMD4:2289, MALT1:2546, PSMD9:2633, ITPR2:3244, ITPR3:3267, RELB:3754, PSMA8:3829, PSMB4:3880, TAB1:3932, PSMD2:3993, PSMD3:4343, NFKBIA:4373, PSMB11:4403, PSMB9:4409, CCL22:4445, PSMB10:5084, PYCARD:5118, PSMB2:5295, NFKB1:5375, PDPK1:5706, NFAT…	0.0168581	0.0583243	0.02356	0.148125
KEGG_INOSITOL_PHOSPHATE_METABOLISM	-0.0737303	50	MIOX:497, PI4KA:530, PIP5K1B:641, PLCD4:734, INPP5K:926, PLCB3:1118, INPP5E:1675, INPP5J:1852, INPPL1:1918, PIK3C2B:2212, INPP4A:2609, CDIPT:2698, INPP5A:2704, OCRL:2757, PLCE1:2879, ALDH6A1:3024, ITPK1:3621, ITPKA:4103, PLCD1:4336, MINPP1:4470, TPI1:4777, INPP5B:4951, PI4KB:5764, IMPA2:6178, PLCG2:6186, PIK3CD:6244, PIK3C2A:6321, PLCZ1:6332, PLCB2:6357, ITPKB:6505, PIKFYVE:6665, ISYNA1:6785, PIP…	0.0717939	0.13921	0.0239	0.148125
KEGG_MAPK_SIGNALING_PATHWAY	0.0678348	203	MAP3K14:31, SOS1:68, TRAF6:240, JUN:289, PDGFA:299, FLNA:307, MKNK2:414, DUSP16:470, MAPK13:512, FGF5:526, CACNG4:535, HSPB1:559, NTF4:608, CACNA2D3:642, MAPKAPK3:648, RASGRF1:828, FASLG:901, CHUK:925, CACNA2D1:929, DUSP7:993, PPM1B:1065, MAP3K13:1093, GNA12:1272, PPP3R2:1446, DDIT3:1448, PRKACA:1458, CACNA1F:1469, RPS6KA5:1493, RPS6KA2:1508, AKT1:1545, FGF6:1648, FGF1:1663, TNF:1713, RASGRF2:175…	0.000945137	0.00802402	0.02408	0.148125
REACTOME_DOWNREGULATION_OF_SMAD2_3_SMAD4_TRANSCRIPTIONAL_ACTIVITY	0.170508	17	SMAD7:218, SNW1:246, WWTR1:640, TRIM33:717, TGIF1:931, TGIF2:1507, SKIL:1653, NEDD4L:3514, SKI:5261, RNF111:6477, SMURF2:6504, PARP1:6650, SERPINE1:7071, NCOR2:8295, ATP1B4:9367, PPM1A:9421, NCOR1:11676	0.0149874	0.0541135	0.0241	0.148125
REACTOME_GASTRIN_CREB_SIGNALLING_PATHWAY_VIA_PKC_AND_MAPK	0.168492	11	SOS1:68, CCKBR:93, RPS6KA2:1508, MMP3:1874, MAPK3:3331, PRKCA:3376, EGFR:5182, GAST:5890, RPS6KA1:7980, MAPK7:8851, HBEGF:13854	0.0530618	0.112719	0.02419	0.148125
REACTOME_BIOTIN_TRANSPORT_AND_METABOLISM	-0.257984	10	ACACA:137, PC:469, ACACB:487, MCCC2:1010, PCCA:2719, PCCB:3526, MCCC1:4034, HLCS:4709, SLC5A6:4765, BTD:10442	0.00474003	0.0262534	0.02441	0.148125
REACTOME_METABOLISM_OF_FAT_SOLUBLE_VITAMINS	-0.146284	39	PNLIP:4, RBP2:22, CLPS:53, LPL:136, GPC6:159, GPC3:508, BCO2:529, LRP8:739, APOB:812, PLB1:835, UBIAD1:931, GPC4:1017, AGRN:1226, TTPA:1710, APOE:2092, LRP1:2151, GPC5:2494, GPC1:2754, SDC3:4077, VKORC1:4302, APOC2:4328, RETSAT:4697, LRAT:5084, APOA4:6232, GPC2:6296, LRP10:7226, SDC1:7426, APOM:8202, RDH11:8543, RBP1:8717, RBP4:8741, HSPG2:9060, LRP12:9093, SDC4:10095, SDC2:10440, BCO1:10722, APO…	0.00159439	0.0108877	0.02483	0.148125
REACTOME_NEUROTRANSMITTER_CLEARANCE	-0.21088	10	COMT:176, SLC22A2:385, SLC22A1:607, MAOA:673, ALDH2:1587, SLC6A3:2219, SLC6A4:3240, LRTOMT:6677, ACHE:10539, BCHE:12939	0.0209693	0.0665345	0.02491	0.148125
REACTOME_COBALAMIN_CBL_VITAMIN_B12_TRANSPORT_AND_METABOLISM	-0.188681	17	PRSS3:51, CTRC:66, CBLIF:239, ABCD4:299, ABCC1:310, MTR:1005, MMUT:1804, MTRR:2041, AMN:2873, MMAA:3258, TCN1:5013, TCN2:5186, CUBN:5908, MMAB:6769, LMBRD1:11405, MMACHC:12434, MMADHC:13004	0.00710321	0.0344545	0.02493	0.148125
KEGG_PEROXISOME	-0.180889	76	AGXT:61, ACOX2:71, ABCD3:99, ACSL5:188, DECR2:211, ACSL1:282, ABCD4:299, HSD17B4:321, PXMP4:352, FAR2:429, ACOT8:442, ECI2:494, ACAA1:551, CAT:723, EPHX2:856, PXMP2:876, SLC27A2:1044, AGPS:1052, PEX16:1271, PIPOX:1304, ACSL6:1320, ACOX1:1335, DAO:1497, EHHADH:1602, GSTK1:1630, MLYCD:1729, SCP2:1771, CRAT:1898, NUDT19:1945, NUDT12:2007, DHRS4:2075, ACSL4:2244, ACSL3:2260, PECR:2371, AMACR:2464, PR…	5.41e-08	3.25e-06	0.0251	0.148125
KEGG_PATHWAYS_IN_CANCER	0.06501	259	SOS1:68, TRAF6:240, CDKN2B:241, FOXO1:283, JUN:289, PDGFA:299, MMP2:303, CCND1:313, STAT5A:471, VEGFD:518, FGF5:526, ARNT2:635, BCL2L1:753, DVL2:773, ITGA3:792, SUFU:815, EP300:887, LAMA4:890, DAPK2:896, FASLG:901, CHUK:925, WNT9B:934, WNT2B:938, IGF1:975, STAT1:977, KIT:982, FZD1:1059, RASSF1:1073, FZD7:1138, LAMB2:1195, PTCH1:1454, KITLG:1544, AKT1:1545, WNT9A:1615, FGF6:1648, EGLN2:1650, FGF1:…	0.000361538	0.00378557	0.02514	0.148125
KEGG_SULFUR_METABOLISM	-0.213592	12	SULT1E1:134, SULT1A2:541, PAPSS2:599, BPNT1:976, SUOX:1004, SULT1A4:1121, SULT1A3:1174, SULT2B1:1507, CHST12:4147, CHST11:10246, CHST13:12414, PAPSS1:12427	0.0104348	0.0425688	0.02578	0.150771
REACTOME_HSF1_DEPENDENT_TRANSACTIVATION	0.149503	23	CRYBA4:176, HSPB2:292, HSPH1:424, HSPB1:559, RPTOR:865, EP300:887, SERPINH1:1330, CAMK2B:2103, AKT1S1:2400, COL4A6:3103, HSPB8:3848, TNFRSF21:4056, CAMK2A:4284, MTOR:5297, HSF1:6646, HSPA1L:8055, DEDD2:8659, CRYAB:8794, FKBP4:9478, CREBBP:9993, MRPL18:10209, HSP90AA1:11805, DNAJB1:11847	0.0131338	0.0497063	0.02623	0.151336
REACTOME_O_LINKED_GLYCOSYLATION	0.0968802	94	ADAMTS10:322, ADAMTS7:362, ADAMTS19:364, GALNT1:401, THSD4:511, SBSPON:517, ADAMTS4:711, ST3GAL2:811, ADAMTS9:1026, THSD1:1044, ADAMTSL4:1169, DAG1:1297, GALNT9:1348, POMK:1440, POMT1:1568, LARGE1:1694, ADAMTS5:1755, ADAMTSL3:1779, B4GALT6:1817, GALNT6:1951, GALNT13:2281, ADAMTS6:2385, ADAMTS2:2412, ADAMTSL1:2435, ADAMTS3:2845, ADAMTSL5:2912, C1GALT1:3127, ADAMTS12:3470, GALNT4:3483, GALNT14:3704…	0.00121646	0.00888647	0.02626	0.151336
REACTOME_NON_INTEGRIN_MEMBRANE_ECM_INTERACTIONS	0.125235	57	NTN4:99, COL11A2:264, PDGFA:299, DDR1:372, LAMA4:890, COL10A1:942, LAMB2:1195, DAG1:1297, TTR:1407, COL5A2:1439, ITGB4:1555, ITGB3:1814, NRXN1:1946, LAMA2:1986, PDGFB:2030, LAMA5:2129, COL4A6:3103, COL4A1:3129, COL1A1:3242, TNC:3337, PRKCA:3376, LAMC2:3456, SDC2:3473, DDR2:3630, SDC4:3818, FN1:4253, TGFB1:4293, COL4A2:4556, DMD:4780, HSPG2:4853, ITGA6:4854, LAMC3:4939, COL2A1:5555, COL11A1:5607, …	0.0010994	0.00829001	0.02676	0.1531
REACTOME_SIGNALING_BY_FGFR2	0.112299	35	SOS1:68, GTF2F1:173, FGF5:526, POLR2F:1548, HNRNPM:1553, FGF6:1648, FGF1:1663, GAB1:2432, CBL:2732, ESRP2:3238, MAPK3:3331, FGFR2:3453, ESRP1:3532, SPRY2:3622, FRS3:3736, NCBP1:3785, SHC1:3918, FGF10:4145, RBFOX2:5830, BRAF:5861, FRS2:5970, PLCG1:6351, SRC:6424, FGF23:7193, FGF17:7610, FGF20:8252, PIK3R1:8583, PTBP1:8822, FGF22:9642, FGFBP1:9686, FGFBP3:10126, FGF4:10685, MKNK1:11567, FGF7:12911,…	0.0216526	0.0675262	0.02711	0.153986
REACTOME_CGMP_EFFECTS	0.154798	14	PDE11A:183, KCNMB3:1321, PDE1B:1669, PDE2A:2060, KCNMB2:2177, KCNMA1:2547, PRKG2:3237, PDE9A:4867, PDE1A:5732, ITPR1:7081, IRAG1:7323, PDE10A:9252, KCNMB1:10746, PDE5A:10923	0.0450073	0.102078	0.0284	0.160161
KEGG_GLIOMA	0.102162	50	SOS1:68, PDGFA:299, CCND1:313, CALML3:439, IGF1:975, AKT1:1545, PDGFB:2030, CAMK2B:2103, MDM2:2203, CDKN2A:2404, EGF:3209, PDGFRA:3316, MAPK3:3331, PRKCA:3376, PIK3CG:3585, PDGFRB:3745, SHC1:3918, RB1:3919, E2F1:4104, TGFA:4214, PIK3R5:4215, CAMK2A:4284, SHC3:4286, CALML5:4849, PRKCG:5085, EGFR:5182, MTOR:5297, BRAF:5861, SOS2:5992, PLCG1:6351, PRKCB:6560, PIK3CB:6664, CDK6:7451, PIK3CD:7669, PLC…	0.0126062	0.0491635	0.02934	0.163242
REACTOME_GLUTATHIONE_CONJUGATION	-0.133729	23	MGST3:130, CHAC2:341, GSTO1:347, GGT1:639, GSTZ1:667, MGST2:1133, MGST1:1315, GCLC:1496, GSTK1:1630, ESD:1842, GGCT:2518, CHAC1:4042, CNDP2:5141, HPGDS:5535, GSS:6778, OPLAH:7814, GGT6:7830, GSTA4:8265, GGT5:8913, GSTO2:11125, GCLM:11156, AKR1A1:11902, GGT7:13484	0.0265248	0.0769767	0.0295	0.163242
REACTOME_REGULATION_OF_PTEN_GENE_TRANSCRIPTION	0.116921	41	PHC1:62, ATN1:95, JUN:289, PHC3:317, EZH2:657, HDAC5:659, RPTOR:865, PHC2:1339, RRAGD:1605, HDAC7:1718, CBX2:2343, KDM1A:2751, RBBP7:2894, MAPK3:3331, SCMH1:3445, GATAD2B:3564, SLC38A9:3996, SALL4:4019, MTA2:4185, MBD3:4197, NR2E1:4687, EGR1:5035, CBX8:5126, MECOM:5175, MTOR:5297, CHD4:5958, SNAI1:7515, ATF2:8004, SNAI2:8243, RING1:8473, CHD3:8977, GATAD2A:9120, MTA1:9407, TP53:9520, RCOR1:9684, …	0.00968664	0.0408429	0.02979	0.163242
REACTOME_RESPONSE_OF_MTB_TO_PHAGOCYTOSIS	0.140063	13	PGK1:150, DUSP16:470, ATP6V1H:1263, TRIM27:2118, MAPK3:3331, ENO1:3893, RNF213:5028, VPS33B:5180, SFPQ:8038, HGS:8280, NOS2:8619, GSK3A:9897, CORO1A:10678	0.0804809	0.146982	0.02984	0.163242
REACTOME_C_TYPE_LECTIN_RECEPTORS_CLRS	0.0760129	79	MAP3K14:31, TRAF6:240, BCL10:309, PSMF1:738, CLEC7A:796, EP300:887, CHUK:925, PSMD1:1008, PSMD13:1267, UBA3:1404, PRKACA:1458, RPS6KA5:1493, TAB3:1772, NFATC2:1809, CARD11:1830, PPP3R1:2002, PAK2:2085, PSMD4:2289, MALT1:2546, PSMD9:2633, FCER1G:3019, ITPR2:3244, ITPR3:3267, RELB:3754, PSMA8:3829, PSMB4:3880, TAB1:3932, PSMD2:3993, MUC15:4003, PRKACB:4160, PSMD3:4343, NFKBIA:4373, PSMB11:4403, PSM…	0.0198576	0.0643018	0.02998	0.163242
KEGG_ADIPOCYTOKINE_SIGNALING_PATHWAY	-0.0951972	58	RXRA:133, CPT1A:152, ACSL5:188, ACSL1:282, PCK1:401, PTPN11:451, ACACB:487, CD36:522, PCK2:569, AGRP:993, PRKCQ:1064, ACSL6:1320, PRKAB2:1750, SLC2A4:1887, PRKAB1:2010, ACSL4:2244, ACSL3:2260, RELA:2802, CPT1B:2963, AKT2:3083, SOCS3:3125, PRKAG1:3310, TRAF2:3723, ADIPOR1:3794, ADIPOQ:3947, TNFRSF1B:4081, IRS4:4586, G6PC2:4716, RXRB:5369, LEPR:5539, TRADD:5688, JAK2:6016, STK11:6269, PPARA:6420, R…	0.0123329	0.0484255	0.03045	0.164665
REACTOME_SIGNALING_BY_MODERATE_KINASE_ACTIVITY_BRAF_MUTANTS	0.0949577	29	IQGAP1:330, TLN1:604, KSR2:686, ITGB3:1814, CAMK2B:2103, ARRB2:2566, CSK:2891, VCL:2993, CNKSR2:3221, PEBP1:3234, MAPK3:3331, FN1:4253, CAMK2A:4284, FGB:4905, KSR1:5497, CNKSR1:5646, BRAF:5861, SRC:6424, ARRB1:7129, JAK2:7897, MARK3:8170, RAF1:8339, MAP2K2:8447, ARAF:8767, MAP3K11:9855, VWF:9908, BRAP:12432, FGG:12853, ITGA2B:13358	0.0770296	0.143601	0.03105	0.166228
REACTOME_SIGNALING_BY_RETINOIC_ACID	-0.127326	35	RXRA:133, CPT1A:152, ALDH1A1:165, CYP26C1:553, DHRS9:785, PPARD:1850, DLD:1875, DHRS4:2075, RDH5:2160, CRABP2:2332, RARA:2828, CPT1B:2963, ALDH1A2:3333, PDK2:3484, SDR16C5:4411, ALDH8A1:4490, RARG:5179, FABP5:5209, RXRB:5369, RDH14:5614, PDHA2:5890, CYP26B1:5973, PDK1:6077, RXRG:6428, ALDH1A3:6641, CYP26A1:6914, DHRS3:7067, DLAT:7356, RDH13:8262, PDHX:8401, RDH11:8543, PDHB:8578, PDK4:9446, PDK3:…	0.00922247	0.0396848	0.03116	0.166228
REACTOME_CLASS_B_2_SECRETIN_FAMILY_RECEPTORS	0.0952038	61	CRH:915, PTH1R:919, WNT9B:934, WNT2B:938, GHRHR:986, FZD1:1059, FZD7:1138, UCN2:1301, CRHR2:1365, SCTR:1396, PTCH1:1454, CRHR1:1564, WNT9A:1615, GCG:1711, FZD10:1815, GLP2R:1876, GIPR:2090, CRHBP:2670, WNT2:3101, WNT3A:3172, WNT11:3423, GNB3:3638, ADCYAP1:3764, UCN:3772, VIP:4175, DHH:4206, GIP:4472, VIPR1:4578, WNT5A:4995, FZD9:5049, PTH2R:5373, WNT8A:5678, WNT10B:5688, ADM:5933, GHRH:6295, FZD6…	0.0102854	0.0422337	0.03156	0.167232
KEGG_GLYCEROPHOSPHOLIPID_METABOLISM	-0.0758777	70	PLA2G1B:207, GPAT3:247, PLA2G12A:253, GPAT4:534, PEMT:709, LPGAT1:743, MBOAT2:841, PISD:886, PLD2:992, LPCAT2:1198, GPD1L:1207, AGPAT2:1274, CDS1:1283, PLA2G2D:1623, CRLS1:1792, PHOSPHO1:1812, GPAM:1941, DGKQ:2336, PLA2G4A:2565, ADPRM:2568, LPCAT1:2596, DGKE:2614, PCYT2:2620, CDIPT:2698, DGKA:2831, DGKD:3465, PLA2G4E:3480, PLA2G2E:3918, AGPAT3:3998, DGKH:4289, GPAT2:4366, DGKG:4389, MBOAT7:4419, …	0.0285492	0.08043	0.0322	0.169485
KEGG_PRIMARY_BILE_ACID_BIOSYNTHESIS	-0.217965	14	ACOX2:71, HSD17B4:321, CYP7A1:761, SLC27A5:1398, CYP46A1:1569, SCP2:1771, CYP7B1:2179, AMACR:2464, CYP27A1:3205, CYP8B1:5101, HSD3B7:6162, AKR1D1:8096, CYP39A1:8283, CH25H:11608	0.00476388	0.0262534	0.03274	0.170891
REACTOME_SIGNALING_BY_FGFR4	0.119319	23	SOS1:68, KLB:629, FGF6:1648, FGF1:1663, GAB1:2432, CBL:2732, MAPK3:3331, SPRY2:3622, FRS3:3736, SHC1:3918, FGF19:4437, FGFR4:5100, BRAF:5861, FRS2:5970, PLCG1:6351, SRC:6424, FGF23:7193, FGF17:7610, FGF20:8252, PIK3R1:8583, FGF4:10685, MKNK1:11567, PTPN11:13462	0.0477716	0.104209	0.0329	0.170891
REACTOME_CONSTITUTIVE_SIGNALING_BY_ABERRANT_PI3K_IN_CANCER	0.0981364	63	PDGFA:299, FGF5:526, KLB:629, KIT:982, CD28:1251, KITLG:1544, FGF6:1648, FGF1:1663, PDGFB:2030, PIK3AP1:2154, GAB2:2197, LCK:2414, GAB1:2432, STRN:2533, ERBB3:2824, IRS1:3116, FGFR1:3154, EGF:3209, PDGFRA:3316, NRG1:3359, FGFR2:3453, PDGFRB:3745, ERBB4:4029, KL:4047, FGF10:4145, TGFA:4214, FGF19:4437, CD80:4607, VAV1:4613, MET:4975, BTC:5061, FGFR4:5100, FLT3:5116, EGFR:5182, ICOS:5323, HGF:5424,…	0.00719213	0.0344545	0.03318	0.171219
REACTOME_PTEN_REGULATION	0.0875112	89	PHC1:62, ATN1:95, JUN:289, PHC3:317, EZH2:657, HDAC5:659, PSMF1:738, RPTOR:865, PSMD1:1008, PSMD13:1267, PHC2:1339, AKT1:1545, RRAGD:1605, USP13:1634, FRK:1676, HDAC7:1718, OTUD3:1881, XIAP:2084, TRIM27:2118, PSMD4:2289, CBX2:2343, PSMD9:2633, KDM1A:2751, RBBP7:2894, MAPK3:3331, MOV10:3363, TNRC6C:3368, SCMH1:3445, GATAD2B:3564, AGO1:3769, PSMA8:3829, PSMB4:3880, PSMD2:3993, SLC38A9:3996, SALL4:4…	0.00445174	0.0251963	0.03415	0.174
REACTOME_DARPP_32_EVENTS	0.155479	16	PPP1CA:1332, PRKACA:1458, PPP3R1:2002, PDE4D:2022, PPP2R1B:2051, PDE4C:2460, PPP2R5D:2802, PPP3CC:2883, PRKACB:4160, PPP1R1B:4941, PRKAR2B:5319, PRKAR2A:8028, PRKAR1A:8036, PRKAR1B:10388, PDE4B:10519, PDE4A:10566	0.0313848	0.0846238	0.03433	0.174
REACTOME_TRANSCRIPTIONAL_ACTIVITY_OF_SMAD2_SMAD3_SMAD4_HETEROTRIMER	0.136184	31	SMAD7:218, CDKN2B:241, SNW1:246, CCNT2:343, WWTR1:640, TRIM33:717, TGIF1:931, E2F4:1071, TGIF2:1507, SKIL:1653, CCNT1:2790, JUNB:3294, MAPK3:3331, NEDD4L:3514, SKI:5261, MYC:5500, TFDP2:6107, RNF111:6477, SMURF2:6504, PARP1:6650, SERPINE1:7071, E2F5:7383, TFDP1:7968, NCOR2:8295, ATP1B4:9367, PPM1A:9421, RBL1:9957, CCNK:10527, SP1:10757, NCOR1:11676, MEN1:11737	0.008754	0.0387664	0.03438	0.174
REACTOME_METHYLATION	-0.196293	11	MAT1A:98, COMT:176, GSTO1:347, MTR:1005, MAT2B:1983, MTRR:2041, TPMT:3581, AHCY:4414, TRMT112:8751, N6AMT1:11099, NNMT:11601	0.0242221	0.0724639	0.03536	0.17782
REACTOME_DISORDERS_OF_TRANSMEMBRANE_TRANSPORTERS	-0.0733093	138	SLC1A1:6, SLC26A3:24, SLC6A19:29, SLC12A1:31, SLC34A3:38, SLC7A9:114, ABCB4:143, SLC6A20:151, SLC5A2:155, HK1:175, SLC4A1:180, SLC26A4:280, ABCD4:299, ABCB11:301, SLC26A2:546, SLC2A2:588, ABCG5:609, ABCG8:632, PSMD10:635, SLC12A3:660, SLC6A18:747, SLC27A4:770, RHAG:915, NDC1:995, SLC5A7:1138, SLC6A2:1180, PSMB1:1448, SLC2A9:1523, NUP42:1526, SLC3A1:1544, SLC22A5:1572, SLC5A5:1612, AVPR2:1629, SLC…	0.00309644	0.0188866	0.03688	0.182318
REACTOME_NEUTROPHIL_DEGRANULATION	-0.0665053	315	PDXK:19, FTH1:39, PRSS3:51, ANO6:80, MIF:83, AOC1:115, PGM2:124, SLC44A2:168, HMOX2:169, MMP8:224, TRPM2:231, PTAFR:232, RAB31:256, DOK3:312, PRKCD:329, SCAMP1:370, GCA:423, CD44:426, MMP9:428, PYGL:452, SYNGR1:489, B4GALT1:513, CD36:522, ACAA1:551, CPNE3:564, ATP11B:574, TLR2:579, PADI2:617, RAB27A:640, SNAP23:655, CAT:723, FRMPD3:731, SERPINB10:869, LAMP2:875, ITGAL:896, ADGRG3:897, DSN1:969, A…	6.08e-05	0.000848592	0.0372	0.182318
REACTOME_RAS_ACTIVATION_UPON_CA2_INFLUX_THROUGH_NMDA_RECEPTOR	0.165116	14	LRRC7:247, DLG4:409, DLG3:688, RASGRF1:828, RASGRF2:1752, CAMK2B:2103, ACTN2:3581, CAMK2A:4284, GRIN2B:5186, DLG1:5494, DLG2:7100, GRIN1:9078, NEFL:12560, GRIN2D:13553	0.0325003	0.0868857	0.03738	0.182318
REACTOME_TOLL_LIKE_RECEPTOR_TLR1_TLR2_CASCADE	0.0804264	70	AGER:206, TRAF6:240, JUN:289, MAPKAPK3:648, MEF2A:892, CHUK:925, DUSP7:993, BTK:1380, RPS6KA5:1493, RPS6KA2:1508, TAB3:1772, S100A12:1922, PPP2R1B:2051, ATF1:2221, MAPK9:2446, NFKBIB:2660, IRAK4:2798, PPP2R5D:2802, MAP2K7:3060, SOCS1:3186, MAPKAPK2:3274, MAPK3:3331, DUSP4:3802, TAB1:3932, VRK3:4155, NOD2:4173, NFKBIA:4373, FGB:4905, SFTPA1:5270, TNIP2:5289, NFKB1:5375, MAPK10:5583, S100A8:5723, N…	0.0202911	0.0647096	0.03742	0.182318
REACTOME_SIGNALLING_TO_RAS	0.144044	12	SOS1:68, MAPK13:512, MAPKAPK3:648, NGF:1980, MAPKAPK2:3274, SHC1:3918, SHC3:4286, SRC:6424, MAPK11:7054, SHC2:10015, NTRK1:10959, MAPK12:11787	0.0841374	0.149319	0.03747	0.182318
REACTOME_RNA_POLYMERASE_II_TRANSCRIBES_SNRNA_GENES	0.120626	49	GTF2F1:173, CCNT2:343, POU2F2:396, INTS6:793, GTF2A1:798, POU2F1:864, NABP1:874, INTS5:933, INTS13:1095, POLR2F:1548, RPRD2:1558, CDK7:1703, TAF11:1938, GTF2E1:2015, ELL2:2043, GTF2E2:2537, CCNT1:2790, NABP2:3150, INTS14:3440, INTS4:3580, SUPT5H:3595, TAF9:3730, NCBP1:3785, TBP:4653, SNAPC5:4980, INTS3:5427, ELL:5778, INTS8:5879, INTS1:6138, INTS9:6160, INTS7:6189, TAF8:6403, ELL3:6838, PCF11:713…	0.0035438	0.0210035	0.03764	0.182318
REACTOME_SYNTHESIS_OF_BILE_ACIDS_AND_BILE_SALTS_VIA_24_HYDROXYCHOLESTEROL	-0.212508	10	PTGIS:994, SLC27A2:1044, SLC27A5:1398, CYP46A1:1569, AMACR:2464, CYP27A1:3205, CYP8B1:5101, HSD3B7:6162, AKR1D1:8096, CYP39A1:8283	0.0199998	0.0643018	0.03804	0.183132
REACTOME_REGULATION_OF_BETA_CELL_DEVELOPMENT	0.121042	38	HNF4A:208, SNW1:246, FOXO1:283, RFX6:315, PAX6:482, KAT2A:626, MAML2:870, EP300:887, HNF1A:1204, HNF1B:1239, AKT1:1545, GCK:1879, PAX4:2303, PTF1A:2324, MAML3:2481, HNF4G:2953, PDX1:3813, RBPJ:3830, FOXA3:3874, FGF10:4145, NEUROG3:4986, FOXA2:5478, NR5A2:5734, INSM1:6550, NEUROD1:6630, NKX2-2:7052, NOTCH1:8247, KAT2B:8758, CREBBP:9993, MAML1:10196, ONECUT1:10644, AKT2:10830, PKLR:11406, MAFA:1142…	0.00991906	0.041544	0.03869	0.185132
KEGG_BUTANOATE_METABOLISM	-0.163298	29	ALDH1B1:26, HADH:322, BDH1:366, OXCT1:918, ALDH3A2:1123, GAD1:1450, HMGCS1:1479, ALDH2:1587, EHHADH:1602, HADHA:1780, ALDH5A1:1789, ACAT1:2817, ACADS:3077, GAD2:3600, ALDH7A1:4272, ABAT:4442, AACS:4528, PDHA2:5890, ECHS1:6305, L2HGDH:6322, ACSM3:6359, ALDH9A1:6755, HMGCL:7288, ACSM4:8334, PDHB:8578, ACAT2:8794, HMGCS2:9104, BDH2:9817, PDHA1:12821	0.00236001	0.0154394	0.0394	0.185931
KEGG_SELENOAMINO_ACID_METABOLISM	-0.132157	21	MAT1A:98, CBS:335, PAPSS2:599, GGT1:639, CTH:741, LCMT2:894, MAT2B:1983, LCMT1:2547, TRMT11:3196, SCLY:4253, AHCY:4414, HEMK1:4526, MARS2:5381, METTL2B:5746, AHCYL2:5918, GGT6:7830, METTL6:8389, GGT5:8913, BUD23:12248, PAPSS1:12427, GGT7:13484	0.0361601	0.0938244	0.03967	0.185931
REACTOME_PASSIVE_TRANSPORT_BY_AQUAPORINS	-0.166207	11	AQP8:76, AQP9:122, AQP5:1099, AQP6:4096, AQP1:4120, AQP7:5171, AQP2:5193, MIP:6011, AQP4:7211, AQP11:7711, AQP3:8528	0.0563681	0.118043	0.03985	0.185931
REACTOME_REGULATION_OF_TLR_BY_ENDOGENOUS_LIGAND	-0.220247	14	CD36:522, TLR2:579, LBP:651, LY96:678, GSDME:721, APOB:812, FGG:1060, TLR4:1187, CD14:3304, SFTPA2:6410, S100A8:8190, SFTPA1:8643, FGB:9008, GSDMD:10683	0.00434265	0.0250298	0.03998	0.185931
REACTOME_MYOGENESIS	0.108685	24	MYF6:136, MYF5:456, MEF2A:892, MEF2D:913, BOC:1234, SPAG9:1449, CDON:2474, NEO1:3086, CDH15:3816, MYOG:4140, NTN3:4493, MYOD1:4611, MAP2K6:5913, CTNNA1:6385, MAPK11:7054, BNIP2:7514, TCF12:7791, CDH4:7924, TCF4:8386, TCF3:9383, CDH2:11216, MEF2B:11252, MAPK12:11787, ABL1:11832	0.0655265	0.131104	0.04021	0.185931
REACTOME_SIGNALING_BY_ACTIVIN	0.219733	10	ACVR2B:741, ACVR1C:858, INHBB:2278, ACVR1B:2453, MAPK3:3331, INHBA:3685, FOXH1:5756, FSTL3:6365, FST:6797, DRAP1:8077	0.0161527	0.056377	0.04027	0.185931
KEGG_TASTE_TRANSDUCTION	-0.12926	29	TAS1R1:47, TAS2R7:101, TAS2R1:132, SCNN1B:277, TAS2R10:338, TAS2R3:412, TAS1R2:819, SCNN1G:954, TAS1R3:1487, ADCY4:3346, ADCY6:3574, TAS2R38:3579, ADCY8:3788, CACNA1B:3823, SCNN1A:3826, CACNA1A:4342, TAS2R41:5083, TRPM5:5486, TAS2R4:6166, PLCB2:6357, ASIC2:7771, KCNB1:7846, PDE1A:8181, PRKACB:9753, GNB3:10275, ITPR3:10646, GNAT3:12356, PRKACA:12455, GRM4:12462	0.0160875	0.056377	0.04104	0.188385
REACTOME_SIGNALING_BY_NOTCH3	0.112417	36	SNW1:246, FABP7:394, NEURL1:528, KAT2A:626, MAML2:870, EP300:887, STAT1:977, HEY2:1133, NOTCH3:1655, JAG1:2353, HEYL:2376, DLL4:2472, MAML3:2481, WWC1:2870, EGF:3209, IKZF1:3468, DLGAP5:3613, RBPJ:3830, EGFR:5182, DLL1:5460, HES5:6285, PSEN1:7723, APH1B:7770, NOTCH1:8247, KAT2B:8758, HEY1:8867, NCSTN:9016, JAG2:9373, MIB2:9986, CREBBP:9993, MAML1:10196, NEURL1B:10491, PLXND1:10620, PSEN2:10737, A…	0.0197375	0.0643018	0.0414	0.188675
REACTOME_TRYPTOPHAN_CATABOLISM	-0.205	14	ACMSD:49, KYAT3:762, HAAO:842, IDO2:1336, KYAT1:1509, SLC7A5:1725, KMO:1827, AADAT:1890, SLC36A4:4073, KYNU:4175, SLC3A2:7747, TDO2:7818, AFMID:10056, IDO1:11621	0.00793815	0.0364022	0.04171	0.188675
REACTOME_GLYCOGEN_BREAKDOWN_GLYCOGENOLYSIS	-0.202205	12	PGM2:124, PHKA2:283, PYGL:452, PHKB:1531, PYGM:1756, AGL:1781, PYGB:3367, PGM2L1:6566, GYG1:6827, PHKA1:7237, PHKG1:8663, PHKG2:9353	0.0153277	0.0550262	0.04182	0.188675
REACTOME_PLASMA_LIPOPROTEIN_CLEARANCE	-0.131513	24	CLTA:695, LIPA:703, AP2A1:799, APOB:812, SOAT2:1431, NPC1:1550, APOE:2092, SCARB1:2471, AMN:2873, HDLBP:3808, SOAT1:3901, LIPC:3908, LSR:4187, LDLRAP1:4426, APOC4:4742, CUBN:5908, NR1H2:6172, VLDLR:7117, AP2A2:7539, NCEH1:7792, NR1H3:8448, APOA1:11032, AP2M1:13266, MYLIP:13858	0.0258498	0.0755351	0.04263	0.190846
REACTOME_TRANSPORT_OF_NUCLEOSIDES_AND_FREE_PURINE_AND_PYRIMIDINE_BASES_ACROSS_THE_PLASMA_MEMBRANE	-0.214766	10	SLC28A2:154, SLC29A2:519, SLC28A3:1475, SLC25A4:1806, SLC29A4:1985, SLC29A3:2993, SLC29A1:4294, SLC28A1:4993, ARL2:9585, ARL2BP:10455	0.0187192	0.0625544	0.04332	0.190846
REACTOME_IRON_UPTAKE_AND_TRANSPORT	-0.0930012	40	FTH1:39, ACO1:42, HMOX2:169, SLC46A1:223, ATP6V1C2:293, CYBRD1:323, ATP6V0A4:568, STEAP3:752, TFRC:1048, ATP6AP1:1430, HMOX1:1873, ATP6V1B1:2097, ATP6V0B:2476, ATP6V0A1:2781, CP:2955, ATP6V1E2:3087, ATP6V0A2:3101, ATP6V1A:3715, STEAP2:3833, HFE:3849, FLVCR1:4338, ATP6V0C:4583, SLC22A17:4700, ATP6V1B2:4905, SLC40A1:6593, ATP6V0D1:6933, FBXL5:7696, ATP6V1F:8826, MCOLN1:9410, ATP6V0D2:9495, ATP6V1G3…	0.0421048	0.0986841	0.04332	0.190846
REACTOME_SELENOAMINO_ACID_METABOLISM	-0.0807109	38	GNMT:5, MAT1A:98, RPL3L:107, CBS:335, PAPSS2:599, LARS1:679, CTH:741, RPLP2:919, RPL32:1125, AIMP2:2150, RPL3:2375, RARS1:2435, EEFSEC:2786, EEF1E1:3607, GSR:3635, SEPSECS:3681, RPL4:3847, QARS1:4088, SCLY:4253, AHCY:4414, RPL7:4543, RPL10L:5460, RPS3:6494, IARS1:7051, SECISBP2:7896, DARS1:8399, PSTK:8706, RPL14:9584, SARS1:9675, AIMP1:9720, RPS27L:10557, KARS1:11200, NNMT:11601, TXNRD1:11865, HN…	0.0855354	0.150601	0.04348	0.190846
REACTOME_ACYL_CHAIN_REMODELLING_OF_PS	-0.138514	18	PLA2G1B:207, PLA2G4D:212, PLA2G12A:253, PLA2G2D:1623, PLA2G4A:2565, OSBPL8:3344, PLA2G4E:3480, PLA2G4F:3680, PLA2R1:3792, PLA2G2E:3918, PLA1A:4183, LPCAT3:6006, OSBPL10:6049, PLA2G5:7329, MBOAT1:8386, PLA2G2F:9021, OSBPL5:10444, LPCAT4:13453	0.0420135	0.0986841	0.04351	0.190846
REACTOME_TICAM1_RIP1_MEDIATED_IKK_COMPLEX_RECRUITMENT	0.222477	10	TRAF6:240, RIPK1:369, CHUK:925, BIRC3:2485, RIPK3:5541, TLR3:5549, BIRC2:5672, UBE2V1:6274, UBE2N:6430, IKBKB:6478	0.0148716	0.054006	0.04376	0.190883
REACTOME_DISEASES_OF_GLYCOSYLATION	0.070774	127	ADAMTS10:322, ADAMTS7:362, ADAMTS19:364, NOTCH2:493, CHST3:496, THSD4:511, SBSPON:517, ADAMTS4:711, NOTCH4:716, CHST6:766, MPI:952, CSPG4:1003, ADAMTS9:1026, THSD1:1044, ADAMTSL4:1169, DAG1:1297, ALG3:1375, POMT1:1568, ALG11:1589, NOTCH3:1655, EXT2:1670, LARGE1:1694, ADAMTS5:1755, ADAMTSL3:1779, B4GALT7:1862, GNE:1919, GALK1:2005, EXT1:2035, PRELP:2101, MPDU1:2196, ADAMTS6:2385, GALE:2393, ADAMTS…	0.00611819	0.0307498	0.04403	0.191005
REACTOME_SIGNALING_BY_ERYTHROPOIETIN	0.138352	18	SOS1:68, STAT5A:471, EPOR:1736, GAB1:2432, PIK3CG:3585, SHC1:3918, PIK3R5:4215, VAV1:4613, LYN:4625, STAT5B:6114, PLCG1:6351, PIK3CB:6664, PIK3CD:7669, PLCG2:7727, JAK2:7897, EPO:7917, PIK3R1:8583, RAPGEF1:8874	0.0422542	0.0986841	0.04447	0.19186
REACTOME_SIGNALING_BY_SCF_KIT	0.0924036	33	SOS1:68, PTPN6:228, STAT5A:471, STAT1:977, KIT:982, FER:1190, GRAP:1410, KITLG:1544, GAB2:2197, TEC:2254, LCK:2414, CBL:2732, SOCS1:3186, PRKCA:3376, FES:3766, GRB10:4088, VAV1:4613, LYN:4625, STAT5B:6114, SRC:6424, JAK2:7897, GRB7:8329, PIK3R1:8583, GRAP2:8799, SH2B3:8907, CHEK1:9363, PIK3R2:10257, PIK3R3:10608, SOCS6:11754, PTPN11:13462, MMP9:13485, SH2B2:13527, YES1:13713	0.0665037	0.131913	0.04481	0.192276
REACTOME_APOPTOTIC_EXECUTION_PHASE	0.0999671	43	H1-2:44, SATB1:277, DBNL:670, HMGB2:881, ACIN1:1106, DNM1L:1141, BCAP31:1460, H1-4:1540, TJP1:2036, PAK2:2085, APC:2213, ROCK1:2463, LMNA:2496, FNTA:2635, BMX:2729, STK26:2840, DSG3:2907, CLSPN:4054, MAPT:4356, TJP2:4973, DSG2:5416, BIRC2:5672, DSP:5853, H1-1:5925, PTK2:6060, LMNB1:6111, CDH1:6137, H1-0:7291, GAS2:7385, GSN:7890, STK24:8671, VIM:8796, CASP6:8926, DSG1:9173, SPTAN1:9804, DFFB:1040…	0.023528	0.0714077	0.04629	0.197553
REACTOME_MET_PROMOTES_CELL_MOTILITY	0.118107	35	COL11A2:264, ITGA3:792, LAMA4:890, DOCK7:1016, LAMB2:1195, COL5A2:1439, LAMA2:1986, LAMA5:2129, GAB1:2432, COL1A1:3242, COL27A1:3439, LAMC2:3456, TNS3:3975, FN1:4253, LAMC3:4939, MET:4975, HGF:5424, COL2A1:5555, COL11A1:5607, COL5A3:6045, PTK2:6060, COL1A2:6383, SRC:6424, ITGA2:7305, LAMC1:7431, LAMB1:7511, COL5A1:7936, LAMA3:8071, COL3A1:8741, LAMB3:8762, RAPGEF1:8874, COL24A1:9635, LAMA1:11460,…	0.0157274	0.0561402	0.04667	0.198104
REACTOME_ALPHA_LINOLENIC_OMEGA3_AND_LINOLEIC_OMEGA6_ACID_METABOLISM	-0.236039	13	ACSL1:282, HSD17B4:321, FADS2:408, ACOT8:442, ACAA1:551, ACOX1:1335, SCP2:1771, ELOVL1:2377, ELOVL3:4017, FADS1:6658, ELOVL5:7251, ELOVL2:8432, ABCD1:12173	0.00322299	0.0194695	0.04743	0.199387
REACTOME_SIGNALING_BY_TGF_BETA_RECEPTOR_COMPLEX	0.104693	50	SMAD7:218, CDKN2B:241, SNW1:246, CCNT2:343, WWTR1:640, TRIM33:717, TGIF1:931, E2F4:1071, PPP1CA:1332, TGIF2:1507, SKIL:1653, CGN:2027, PMEPA1:2166, TGFBR2:2415, CBL:2732, CCNT1:2790, FURIN:2846, JUNB:3294, MAPK3:3331, NEDD4L:3514, TGFB1:4293, SKI:5261, PARD6A:5367, MYC:5500, USP15:5682, TFDP2:6107, TGFBR1:6261, RNF111:6477, SMURF2:6504, BAMBI:6597, PARP1:6650, SERPINE1:7071, STRAP:7098, ARHGEF18:…	0.010573	0.0428543	0.04756	0.199387
REACTOME_ERK_MAPK_TARGETS	0.183522	14	MEF2A:892, DUSP7:993, RPS6KA5:1493, RPS6KA2:1508, PPP2R1B:2051, PPP2R5D:2802, MAPK3:3331, DUSP4:3802, VRK3:4155, ELK1:6665, MAPK11:7054, RPS6KA1:7980, MAPK7:8851, DUSP3:11999	0.0174751	0.0596667	0.04773	0.199387
REACTOME_INITIATION_OF_NUCLEAR_ENVELOPE_NE_REFORMATION	0.170635	14	VRK2:1541, VRK1:1706, ANKLE2:2418, LMNA:2496, LEMD3:2794, SIRT2:3131, PPP2R2A:4064, LEMD2:4187, CCNB2:4753, CCNB1:5490, LMNB1:6111, EMD:7921, TMPO:8078, LBR:11602	0.0271277	0.0774676	0.04841	0.200606
REACTOME_RAS_PROCESSING	0.165125	11	ICMT:750, BCL2L1:753, LYPLA1:786, FNTA:2635, PRKG2:3237, ARL2:4328, RCE1:4951, FNTB:6916, ABHD17A:7461, ZDHHC9:8013, PRKCQ:12849	0.0579922	0.119846	0.04853	0.200606
REACTOME_BRANCHED_CHAIN_AMINO_ACID_CATABOLISM	-0.199544	21	ACADSB:17, HIBCH:297, BCKDK:445, ACAD8:871, MCCC2:1010, AUH:1328, SLC25A44:1753, DLD:1875, ACAT1:2817, PPM1K:3012, ALDH6A1:3024, HIBADH:3152, MCCC1:4034, BCAT2:4312, ECHS1:6305, BCKDHA:6988, BCAT1:7319, DBT:8542, HSD17B10:8660, IVD:8713, BCKDHB:10180	0.00155922	0.0107645	0.04918	0.201865
REACTOME_FC_EPSILON_RECEPTOR_FCERI_SIGNALING	0.0765726	86	SOS1:68, TRAF6:240, TXK:260, JUN:289, BCL10:309, ITK:469, PSMF1:738, CHUK:925, PSMD1:1008, PSMD13:1267, BTK:1380, TAB3:1772, NFATC2:1809, CARD11:1830, PPP3R1:2002, PAK2:2085, GAB2:2197, TEC:2254, PSMD4:2289, MAPK9:2446, MALT1:2546, PSMD9:2633, FCER1G:3019, MAP2K7:3060, ITPR2:3244, ITPR3:3267, MAPK3:3331, PSMA8:3829, PSMB4:3880, SHC1:3918, TAB1:3932, PSMD2:3993, PSMD3:4343, NFKBIA:4373, PSMB11:440…	0.0144105	0.0529632	0.0494	0.201865
REACTOME_SIGNALING_BY_RECEPTOR_TYROSINE_KINASES	0.0531822	405	NAB1:21, ATP6V1E1:36, SOS1:68, GTF2F1:173, PTPN6:228, COL11A2:264, PDGFA:299, LYL1:319, PDGFD:354, ID1:377, TCIRG1:384, DLG4:409, STAT5A:471, MAPK13:512, VEGFD:518, FGF5:526, HSPB1:559, FLRT3:570, PTN:596, NTF4:608, KLB:629, AP2M1:647, MAPKAPK3:648, PTPRO:680, GABRB1:683, PTPRK:695, FOSB:768, NCK2:788, ITGA3:792, EP300:887, LAMA4:890, MEF2A:892, MEF2D:913, IGF1:975, STAT1:977, KIT:982, DUSP7:993,…	0.00030023	0.00330909	0.04966	0.201865
REACTOME_ACTIVATION_OF_GENE_EXPRESSION_BY_SREBF_SREBP	-0.126669	37	RXRA:133, ACACA:137, ACACB:487, ELOVL6:562, SCD:1205, HMGCS1:1479, GPAM:1941, IDI1:2515, SQLE:2589, CARM1:2605, HMGCR:2804, FASN:3048, SP1:3156, MTF1:3279, SC5D:3411, NCOA2:3412, MVD:3421, CREBBP:3920, FDPS:4310, TGS1:4363, HELZ2:4731, LSS:4955, SREBF1:4982, PPARA:6420, PMVK:6723, FDFT1:6837, MVK:7161, DHCR7:7511, NCOA1:7902, CHD9:8152, CYP51A1:8317, NFYC:8500, TM7SF2:8922, GGPS1:9356, NCOA6:1163…	0.00774627	0.0357835	0.05009	0.201865
REACTOME_DEFECTS_IN_VITAMIN_AND_COFACTOR_METABOLISM	-0.171299	21	ACACA:137, CBLIF:239, ABCD4:299, PC:469, MTR:1005, MCCC2:1010, MMUT:1804, MTRR:2041, PCCA:2719, AMN:2873, MMAA:3258, PCCB:3526, MCCC1:4034, HLCS:4709, TCN2:5186, CUBN:5908, MMAB:6769, BTD:10442, LMBRD1:11405, MMACHC:12434, MMADHC:13004	0.00661447	0.0327206	0.05012	0.201865
KEGG_RETINOL_METABOLISM	-0.14365	23	CYP1A1:43, ALDH1A1:165, UGT1A1:376, CYP26C1:553, DHRS9:785, RDH12:1645, DHRS4:2075, RDH5:2160, ADH5:2298, DGAT2:2885, ALDH1A2:3333, RETSAT:4697, RDH8:4858, LRAT:5084, CYP26B1:5973, PNPLA4:6556, CYP26A1:6914, DHRS3:7067, RDH11:8543, RPE65:9783, BCO1:10722, DGAT1:11434, AWAT2:12873	0.0171717	0.058951	0.05052	0.201865
KEGG_WNT_SIGNALING_PATHWAY	0.0798342	103	JUN:289, CCND1:313, DVL2:773, EP300:887, WNT9B:934, WNT2B:938, FZD1:1059, FZD7:1138, TBL1X:1148, PRICKLE2:1336, PRICKLE1:1403, PPP3R2:1446, PRKACA:1458, DAAM1:1520, WNT9A:1615, CCND2:1645, DKK1:1646, SFRP5:1791, NFATC2:1809, FZD10:1815, VANGL1:1989, PPP3R1:2002, PPP2R1B:2051, CAMK2B:2103, APC:2213, PPP2R5B:2220, TCF7L1:2264, MAPK9:2446, ROCK1:2463, PPP2R5D:2802, LRP6:2803, PPP3CC:2883, AXIN2:2962…	0.0052878	0.0281503	0.05064	0.201865
REACTOME_PLASMA_LIPOPROTEIN_ASSEMBLY_REMODELING_AND_CLEARANCE	-0.103381	55	LPL:136, ABCG1:244, ANGPTL3:388, ANGPTL8:400, ALB:567, CLTA:695, LIPA:703, CIDEC:730, AP2A1:799, APOB:812, A2M:885, MTTP:1074, SOAT2:1431, NPC1:1550, APOE:2092, SCARB1:2471, LIPG:2664, APOA5:2801, AMN:2873, HDLBP:3808, SOAT1:3901, LIPC:3908, BMP1:4146, LSR:4187, CREB3L3:4201, APOC2:4328, LDLRAP1:4426, APOC4:4742, ANGPTL4:5243, MBTPS2:5265, CUBN:5908, NR1H2:6172, APOA4:6232, MBTPS1:6591, LMF1:6623…	0.00812396	0.0369844	0.05088	0.201865
REACTOME_PHOSPHOLIPID_METABOLISM	-0.0545416	181	SLC44A2:168, PNPLA7:203, PLA2G1B:207, PLA2G4D:212, TMEM86B:229, GPAT3:247, PLA2G12A:253, GDE1:278, SLC44A1:340, STARD10:368, DGAT2L6:499, PI4KA:530, GPAT4:534, GDPD1:538, CPNE3:564, PIP5K1B:641, PEMT:709, LPGAT1:743, HADHB:796, ABHD3:820, PLB1:835, MBOAT2:841, PISD:886, INPP5K:926, PLD2:992, PITPNM2:1109, LPCAT2:1198, GPD1L:1207, AGPAT2:1274, CDS1:1283, STARD7:1340, MTMR4:1594, LPIN3:1606, PLA2G2…	0.0119477	0.0472079	0.05276	0.208277
REACTOME_TAK1_ACTIVATES_NFKB_BY_PHOSPHORYLATION_AND_ACTIVATION_OF_IKKS_COMPLEX	0.107453	23	AGER:206, TRAF6:240, CHUK:925, TAB3:1772, S100A12:1922, NFKBIB:2660, TAB1:3932, NOD2:4173, NFKBIA:4373, NFKB1:5375, NOD1:5783, UBE2V1:6274, UBE2N:6430, IKBKB:6478, APP:6689, RIPK2:7017, NKIRAS1:7105, IRAK2:7393, TAB2:9060, IRAK1:9584, NFKB2:9725, MAP3K7:10954, RELA:11111	0.0746607	0.143004	0.05309	0.208537
REACTOME_SIGNALING_BY_THE_B_CELL_RECEPTOR_BCR	0.0731813	72	SOS1:68, PTPN6:228, BCL10:309, PSMF1:738, CHUK:925, PSMD1:1008, BLK:1096, PSMD13:1267, BTK:1380, NFATC2:1809, CARD11:1830, PPP3R1:2002, TRPC1:2079, PIK3AP1:2154, PSMD4:2289, MALT1:2546, RASGRP3:2604, PSMD9:2633, NFKBIB:2660, ITPR2:3244, ITPR3:3267, SH3KBP1:3789, ORAI1:3797, PSMA8:3829, PSMB4:3880, PSMD2:3993, PSMD3:4343, NFKBIA:4373, PSMB11:4403, PSMB9:4409, VAV1:4613, LYN:4625, PSMB10:5084, PSMB…	0.0322305	0.0865326	0.05348	0.208936
REACTOME_O_GLYCOSYLATION_OF_TSR_DOMAIN_CONTAINING_PROTEINS	0.148775	38	ADAMTS10:322, ADAMTS7:362, ADAMTS19:364, THSD4:511, SBSPON:517, ADAMTS4:711, ADAMTS9:1026, THSD1:1044, ADAMTSL4:1169, ADAMTS5:1755, ADAMTSL3:1779, ADAMTS6:2385, ADAMTS2:2412, ADAMTSL1:2435, ADAMTS3:2845, ADAMTSL5:2912, ADAMTS12:3470, ADAMTS17:4103, CFP:4658, SEMA5B:4970, THSD7B:5286, THSD7A:5563, ADAMTS8:5856, ADAMTS15:6036, SPON2:6320, THBS2:6569, ADAMTS13:6772, THBS1:7550, ADAMTS18:8040, POFUT2…	0.00152727	0.0106611	0.05397	0.208936
REACTOME_MITOTIC_PROPHASE	0.096325	65	USO1:356, NUP153:494, NUP54:598, NUP155:669, NEK9:959, LPIN1:1047, NUP58:1124, VRK2:1541, VRK1:1706, PPP2R1B:2051, SEC13:2080, NUP160:2244, NUP88:2429, LMNA:2496, LEMD3:2794, BLZF1:3151, NUP210:3152, KMT5A:3177, MASTL:3303, MAPK3:3331, PRKCA:3376, RAE1:3535, NUP37:3561, NUP50:3627, NUP214:3850, NUP188:3885, RB1:3919, PHF8:3988, TPR:4025, LEMD2:4187, NUP107:4564, MCPH1:4624, CCNB2:4753, PLK1:5420,…	0.00737492	0.0348365	0.05414	0.208936
REACTOME_SIGNALING_BY_FGFR1	0.0988943	32	SOS1:68, FGF5:526, FLRT3:570, FLRT1:994, FGF6:1648, FGF1:1663, GAB1:2432, CBL:2732, FGFR1:3154, MAPK3:3331, SPRY2:3622, FRS3:3736, SHC1:3918, KL:4047, FGF10:4145, BRAF:5861, FRS2:5970, PLCG1:6351, SRC:6424, FGF23:7193, FGF17:7610, FGFRL1:7752, FLRT2:7997, FGF20:8252, PIK3R1:8583, SPRED1:8586, ANOS1:8636, FGF22:9642, FGF4:10685, MKNK1:11567, SPRED2:12241, PTPN11:13462	0.0531079	0.112719	0.05425	0.208936
REACTOME_BLOOD_GROUP_SYSTEMS_BIOSYNTHESIS	-0.16334	16	B3GALT5:78, RHD:482, RHCE:601, ST3GAL6:934, ST6GALNAC6:1964, FUT10:2257, FUT11:4677, FUT7:4872, FUT9:5004, ST3GAL4:5225, B4GALNT2:5961, FUT4:6251, B3GALT2:7718, ST3GAL3:8355, FUT1:8931, B3GALT4:9075	0.023761	0.0715828	0.05573	0.212045
REACTOME_NEGATIVE_REGULATION_OF_THE_PI3K_AKT_NETWORK	0.0740628	89	TRAF6:240, PDGFA:299, FGF5:526, KLB:629, KIT:982, CD28:1251, KITLG:1544, AKT1:1545, FGF6:1648, FGF1:1663, PIP4K2C:1950, PDGFB:2030, PPP2R1B:2051, INSR:2062, PIK3AP1:2154, GAB2:2197, PPP2R5B:2220, LCK:2414, GAB1:2432, STRN:2533, IRAK4:2798, PPP2R5D:2802, ERBB3:2824, TRIB3:2886, IRS1:3116, PIP4K2A:3143, FGFR1:3154, EGF:3209, PDGFRA:3316, MAPK3:3331, NRG1:3359, FGFR2:3453, PDGFRB:3745, ERBB4:4029, K…	0.0160777	0.056377	0.05583	0.212045
REACTOME_NEUROTRANSMITTER_RECEPTORS_AND_POSTSYNAPTIC_SIGNAL_TRANSMISSION	0.0874649	135	CHRNA3:73, GABBR1:84, GRIP1:153, LRRC7:247, KCNJ5:269, CAMKK2:305, NSF:311, DLG4:409, NPTN:442, CACNG4:535, AP2M1:647, GABRB1:683, DLG3:688, APBA1:729, KPNA2:740, RASGRF1:828, EPB41L1:831, GRIK1:883, NBEA:894, HTR3B:936, GRIA1:1381, PRKACA:1458, RPS6KA2:1508, CAMK1:1535, GNAT3:1557, KCNJ9:1661, CHRND:1717, RASGRF2:1752, GLRA3:1810, CHRNA5:1887, CHRNA9:1893, TUBB1:2046, CAMK2B:2103, GABRR1:2139, G…	0.000480775	0.00479436	0.05623	0.212045
REACTOME_FLT3_SIGNALING_IN_DISEASE	0.11392	18	SOS1:68, STAT5A:471, SPTBN1:492, BCL2L1:753, GAB2:2197, CBL:2732, PIM1:3340, TRIP11:4852, FLT3:5116, MYO18A:5636, GOLGB1:5727, STAT5B:6114, ETV6:7543, PIK3R1:8583, NOX4:8945, CDKN1A:9492, PTPN11:13462, ZMYM2:13494	0.0944554	0.158515	0.05633	0.212045
REACTOME_GLUCAGON_TYPE_LIGAND_RECEPTORS	0.132162	16	GHRHR:986, SCTR:1396, GCG:1711, GLP2R:1876, GIPR:2090, GNB3:3638, ADCYAP1:3764, VIP:4175, GIP:4472, VIPR1:4578, GHRH:6295, VIPR2:7031, ADCYAP1R1:8192, CYSLTR2:10410, GNB5:10582, GLP1R:13046	0.0673391	0.133036	0.0564	0.212045
KEGG_NOTCH_SIGNALING_PATHWAY	0.103948	38	SNW1:246, NOTCH2:493, KAT2A:626, NOTCH4:716, DVL2:773, MAML2:870, EP300:887, NOTCH3:1655, JAG1:2353, DLL4:2472, MAML3:2481, ADAM17:2597, DVL1:3169, RBPJ:3830, LFNG:3930, CTBP1:4703, DLL1:5460, RBPJL:5588, DTX1:5647, HES5:6285, DVL3:6407, DLL3:6703, NUMB:7364, MFNG:7488, PSEN1:7723, RFNG:8048, CTBP2:8230, NOTCH1:8247, NCOR2:8295, KAT2B:8758, NCSTN:9016, JAG2:9373, CREBBP:9993, MAML1:10196, NUMBL:1…	0.026796	0.0769767	0.05671	0.2122
REACTOME_SIGNALING_BY_WNT	0.0607553	174	RSPO1:233, BCL9:323, GNAT2:519, AP2M1:647, PSMF1:738, DVL2:773, SOX4:801, ROR2:873, EP300:887, SOX6:916, WNT9B:934, WNT2B:938, PSMD1:1008, FZD1:1059, CBY1:1094, BCL9L:1127, FZD7:1138, PSMD13:1267, PRICKLE1:1403, DAAM1:1520, AKT1:1545, RSPO3:1588, WNT9A:1615, DKK1:1646, RSPO4:1741, CCDC88C:1931, PPP3R1:2002, PPP2R1B:2051, XIAP:2084, APC:2213, PPP2R5B:2220, TCF7L1:2264, PSMD4:2289, ZNRF3:2322, WLS:…	0.00602208	0.0307034	0.05755	0.214327
REACTOME_SIGNALING_BY_PDGF	0.0831142	49	SOS1:68, PDGFA:299, PDGFD:354, STAT5A:471, NCK2:788, STAT1:977, COL6A5:1258, COL5A2:1439, BCAR1:1726, PDGFB:2030, COL6A2:2106, PDGFC:2370, FURIN:2846, COL4A1:3129, COL9A2:3205, THBS3:3254, PDGFRA:3316, PDGFRB:3745, COL4A2:4556, PLAT:4758, PTPN12:5199, COL2A1:5555, STAT6:5759, COL5A3:6045, STAT5B:6114, PLCG1:6351, SRC:6424, THBS2:6569, PIK3CB:6664, COL6A3:7442, THBS1:7550, COL6A6:7705, RASA1:7928,…	0.0445061	0.101307	0.05819	0.215693
REACTOME_REVERSIBLE_HYDRATION_OF_CARBON_DIOXIDE	-0.16476	11	CA3:54, CA6:118, CA4:575, CA2:2048, CA12:3426, CA5B:3664, CA5A:4497, CA13:5585, CA7:8075, CA9:8552, CA14:13316	0.0585478	0.120598	0.05897	0.216243
REACTOME_EUKARYOTIC_TRANSLATION_INITIATION	-0.108596	33	RPL3L:107, EIF5B:274, RPLP2:919, RPL32:1125, EIF3J:1135, EIF3F:1358, EIF2B5:1861, EIF2B1:2029, RPL3:2375, EIF4B:2450, EIF5:2934, EIF3G:3013, EIF2S2:3218, EIF3B:3313, EIF3H:3397, EIF2B3:3551, RPL4:3847, RPL7:4543, EIF4G1:4969, EIF4H:5433, RPL10L:5460, EIF3C:5744, EIF4E:6486, RPS3:6494, EIF3A:7498, EIF4EBP1:9475, RPL14:9584, RPS27L:10557, EIF2B2:11264, EIF3L:11336, EIF2B4:11922, RPL36A:13647, RPL9:…	0.0310394	0.0840532	0.05906	0.216243
REACTOME_BETA_CATENIN_INDEPENDENT_WNT_SIGNALING	0.0792114	85	GNAT2:519, AP2M1:647, PSMF1:738, DVL2:773, ROR2:873, PSMD1:1008, FZD1:1059, FZD7:1138, PSMD13:1267, PRICKLE1:1403, DAAM1:1520, PPP3R1:2002, TCF7L1:2264, PSMD4:2289, ROR1:2398, ARRB2:2566, PSMD9:2633, AXIN2:2962, DVL1:3169, PRKG2:3237, ITPR2:3244, WNT5B:3264, ITPR3:3267, MOV10:3363, TNRC6C:3368, PRKCA:3376, WNT11:3423, PLCB1:3536, GNB3:3638, PDE6B:3640, AGO1:3769, PSMA8:3829, PSMB4:3880, PSMD2:399…	0.01185	0.0471182	0.05916	0.216243
REACTOME_SYNTHESIS_OF_PROSTAGLANDINS_PG_AND_THROMBOXANES_TX	-0.149403	11	PTGS1:351, TBXAS1:882, PTGIS:994, PTGES2:2184, PTGR2:3626, PTGES:3816, CYP8B1:5101, HPGDS:5535, HPGD:7845, PTGS2:10710, PTGDS:10859	0.0862981	0.150601	0.05975	0.217192
REACTOME_SUMOYLATION_OF_DNA_METHYLATION_PROTEINS	0.175249	11	PHC1:62, PHC3:317, PHC2:1339, PCGF2:2206, CBX2:2343, SCMH1:3445, CBX8:5126, DNMT3A:6598, RING1:8473, DNMT1:9777, DNMT3B:11413	0.0442208	0.101307	0.06005	0.217192
REACTOME_RECEPTOR_TYPE_TYROSINE_PROTEIN_PHOSPHATASES	0.138591	19	SLITRK6:813, PPFIBP1:855, IL1RAPL1:1534, PTPRD:1616, PPFIBP2:2195, SLITRK3:2359, SLITRK4:2804, SLITRK1:2810, NTRK3:2867, PTPRF:3089, SLITRK5:4610, SLITRK2:4795, PPFIA2:5337, IL1RAPL2:9596, PPFIA3:9599, IL1RAP:9740, PPFIA4:10116, LRRC4B:11671, PTPRS:11703	0.0366048	0.0938244	0.06036	0.217192
REACTOME_DEGRADATION_OF_CYSTEINE_AND_HOMOCYSTEINE	-0.135221	14	GOT2:30, CTH:741, CDO1:769, SUOX:1004, TXN2:1279, CSAD:1981, SQOR:3911, MPST:3912, ETHE1:5392, GADL1:7965, TST:9073, ADO:9989, TSTD1:10139, SLC25A10:12860	0.079935	0.146982	0.06052	0.217192
REACTOME_PLATELET_CALCIUM_HOMEOSTASIS	0.110282	27	TRPC6:253, P2RX6:825, SLC8A2:1824, ATP2A3:2471, TRPC7:2487, P2RX5:3091, ITPR2:3244, ITPR3:3267, P2RX1:3598, ORAI1:3797, SLC8A3:3832, P2RX7:3943, P2RX4:4205, SLC8A1:4323, TRPC3:4588, P2RX3:4783, ORAI2:5352, ITPR1:7081, ATP2B1:7798, SRI:7954, ATP2B3:8618, ATP2B4:8733, ATP2B2:9106, STIM1:10328, P2RX2:11362, ATP2A1:11650, ATP2A2:12115	0.0475128	0.104095	0.06083	0.217317
REACTOME_GLYCOGEN_METABOLISM	-0.159647	20	PGM2:124, PHKA2:283, GYS2:390, PYGL:452, GBE1:1488, PHKB:1531, PYGM:1756, AGL:1781, PYGB:3367, PPP1R3C:3841, NHLRC1:4746, GYS1:5726, PGM2L1:6566, GYG1:6827, UGP2:7173, PHKA1:7237, PHKG1:8663, PGM1:9033, PHKG2:9353, EPM2A:11388	0.0135077	0.0505248	0.06132	0.21808
KEGG_MELANOMA	0.0941616	54	PDGFA:299, CCND1:313, PDGFD:354, FGF5:526, IGF1:975, AKT1:1545, FGF6:1648, FGF1:1663, MITF:1770, PDGFB:2030, MDM2:2203, PDGFC:2370, CDKN2A:2404, FGFR1:3154, EGF:3209, PDGFRA:3316, MAPK3:3331, PIK3CG:3585, PDGFRB:3745, FGF21:3801, RB1:3919, E2F1:4104, FGF10:4145, PIK3R5:4215, FGF19:4437, MET:4975, EGFR:5182, HGF:5424, BRAF:5861, CDH1:6137, PIK3CB:6664, FGF23:7193, CDK6:7451, FGF17:7610, PIK3CD:766…	0.0168963	0.0583243	0.06175	0.218625
REACTOME_RAB_GEFS_EXCHANGE_GTP_FOR_GDP_ON_RABS	0.0743571	66	RIN2:575, GDI1:581, RAB3IL1:987, RABGEF1:1014, RAB5C:1069, AKT1:1545, RAB27B:1622, DENND5B:1664, MADD:1677, CCZ1B:1773, RIC1:1787, CCZ1:2172, RINL:2202, RGP1:2298, SBF1:2351, DENND4A:2354, ULK1:2442, RIN1:2510, RAB38:2801, DENND2B:2944, CHML:2992, RAB7B:3112, HPS4:3320, ANKRD27:3600, DENND4C:3866, TRAPPC6A:4487, DENND1A:5165, ALS2:5206, RAB18:5716, DENND1B:5742, TRAPPC8:5923, TRAPPC11:5989, HPS1:…	0.0371533	0.0938244	0.06288	0.220788
REACTOME_FGFR2_MUTANT_RECEPTOR_ACTIVATION	0.133858	14	GTF2F1:173, FGF5:526, POLR2F:1548, FGF6:1648, FGF1:1663, FGFR2:3453, NCBP1:3785, FGF10:4145, FGF23:7193, FGF17:7610, FGF20:8252, FGF22:9642, FGF4:10685, FGF7:12911	0.083021	0.148597	0.06296	0.220788
REACTOME_YAP1_AND_WWTR1_TAZ_STIMULATED_GENE_EXPRESSION	0.16818	14	HIPK1:278, NPPA:455, WWTR1:640, YAP1:1750, TEAD4:2200, GATA4:2210, TEAD3:2437, CCN2:3678, RUNX2:3979, NKX2-5:6809, KAT2B:8758, TEAD2:9778, HIPK2:10176, TBX5:13184	0.0294155	0.0808311	0.0632	0.220788
REACTOME_DOWNSTREAM_SIGNALING_OF_ACTIVATED_FGFR4	0.122559	17	SOS1:68, KLB:629, FGF6:1648, FGF1:1663, GAB1:2432, FRS3:3736, SHC1:3918, FGF19:4437, FGFR4:5100, FRS2:5970, PLCG1:6351, FGF23:7193, FGF17:7610, FGF20:8252, PIK3R1:8583, FGF4:10685, PTPN11:13462	0.0803646	0.146982	0.06401	0.222633
REACTOME_BASIGIN_INTERACTIONS	-0.148346	21	SLC7A6:91, SLC7A9:114, SLC7A11:510, SLC7A5:1725, SLC7A10:1731, SLC7A8:1835, ITGB1:1984, SLC7A7:2004, MAG:2771, ATP1B3:3391, PPIL2:3617, CAV1:3991, ATP1B1:4483, SLC16A3:5356, ATP1B2:6065, BSG:7286, SLC3A2:7747, ITGA6:9059, SLC16A8:9772, ITGA3:13121, L1CAM:13220	0.0186838	0.0625544	0.06592	0.22759
REACTOME_CONSTITUTIVE_SIGNALING_BY_LIGAND_RESPONSIVE_EGFR_CANCER_VARIANTS	0.14051	10	SOS1:68, GAB1:2432, CBL:2732, EGF:3209, SHC1:3918, EGFR:5182, PLCG1:6351, CDC37:7209, PIK3R1:8583, HSP90AA1:11805	0.124004	0.17638	0.0663	0.22759
REACTOME_CONSTITUTIVE_SIGNALING_BY_EGFRVIII	0.14051	10	SOS1:68, GAB1:2432, CBL:2732, EGF:3209, SHC1:3918, EGFR:5182, PLCG1:6351, CDC37:7209, PIK3R1:8583, HSP90AA1:11805	0.124004	0.17638	0.0663	0.22759
REACTOME_SIGNALING_BY_INTERLEUKINS	0.0481021	331	RAG1:60, SOS1:68, PTPN14:85, AGER:206, PTPN6:228, TRAF6:240, TIMP1:261, FOXO1:283, JUN:289, MMP2:303, CCND1:313, IL17RA:340, IL18:459, STAT5A:471, STAT4:481, CCR2:557, PTPN9:563, MAPKAPK3:648, PSMF1:738, BCL2L1:753, IL12A:762, MSN:765, POU2F1:864, MEF2A:892, FASLG:901, CAPZA1:918, CHUK:925, STAT1:977, IL16:978, DUSP7:993, PSMD1:1008, OPRM1:1088, BATF:1113, PSMD13:1267, SQSTM1:1286, CNN2:1294, IRF…	0.00297877	0.0183471	0.06691	0.22869
REACTOME_ACYL_CHAIN_REMODELLING_OF_PE	-0.120096	21	PLA2G1B:207, PLA2G4D:212, PLA2G12A:253, MBOAT2:841, PLA2G2D:1623, PLA2G4A:2565, ABHD4:2795, PLA2G4E:3480, PLA2G4F:3680, PLA2R1:3792, PLA2G2E:3918, PLBD1:4216, PLA2G3:5401, LPCAT3:6006, PLA2G5:7329, PNPLA8:8027, MBOAT1:8386, PLA2G2F:9021, PLAAT1:10865, PLA2G6:11928, LPCAT4:13453	0.0569213	0.11827	0.06781	0.230767
REACTOME_FORMATION_OF_TC_NER_PRE_INCISION_COMPLEX	0.0939504	29	AQR:827, EP300:887, ISY1:1147, POLR2F:1548, ERCC8:1575, CDK7:1703, ERCC3:2188, XPA:2229, GTF2H4:2265, ZNF830:2388, TCEA1:2514, GPS1:2921, CUL4B:3215, COPS7B:3859, XAB2:3957, COPS4:4021, PPIE:4165, GTF2H1:5409, UVSSA:7051, USP7:8271, HMGN1:9249, MNAT1:10031, GTF2H3:10860, COPS8:10953, ERCC6:11553, CCNH:12931, CUL4A:13073, GTF2H2:13357, ERCC2:13518	0.0802165	0.146982	0.06865	0.232623
REACTOME_FOXO_MEDIATED_TRANSCRIPTION_OF_CELL_DEATH_GENES	0.14723	13	FOXO1:283, CITED2:419, EP300:887, FASLG:901, DDIT3:1448, FOXO3:1729, NFYC:5413, PINK1:6471, FOXO4:7418, STK11:7644, CREBBP:9993, BCL2L11:10021, BCL6:12785	0.0661591	0.131913	0.06953	0.234598
REACTOME_PI3K_AKT_SIGNALING_IN_CANCER	0.0810034	86	FOXO1:283, PDGFA:299, FGF5:526, KLB:629, CHUK:925, KIT:982, RPS6KB2:1201, CD28:1251, KITLG:1544, AKT1:1545, FGF6:1648, FGF1:1663, FOXO3:1729, PDGFB:2030, PIK3AP1:2154, GAB2:2197, MDM2:2203, AKT1S1:2400, LCK:2414, GAB1:2432, STRN:2533, ERBB3:2824, IRS1:3116, FGFR1:3154, EGF:3209, PDGFRA:3316, NRG1:3359, FGFR2:3453, PDGFRB:3745, MAPKAP1:3965, ERBB4:4029, KL:4047, FGF10:4145, TGFA:4214, FGF19:4437, …	0.00964085	0.0408429	0.06984	0.234641
REACTOME_OVARIAN_TUMOR_DOMAIN_PROTEASES	0.0940438	25	OTUD7B:167, TRAF6:240, RIPK1:369, YOD1:1409, OTUD3:1881, APC:2213, OTUD5:2242, TNIP3:2319, NOD2:4173, TNIP2:5289, TNIP1:5291, TRAF3:5397, NOD1:5783, TNFAIP3:5855, VCPIP1:6652, RIPK2:7017, ZRANB1:8138, ESR1:8197, IFIH1:8634, OTUB2:8650, TP53:9520, OTUB1:9791, DDX58:10942, TRIM25:12395, RNF128:12409	0.103882	0.167173	0.07128	0.238464
REACTOME_SYNTHESIS_OF_IP3_AND_IP4_IN_THE_CYTOSOL	-0.092431	24	PLCH2:720, PLCD4:734, PLCB3:1118, INPP5J:1852, INPPL1:1918, INPP5D:2052, OCRL:2757, PLCE1:2879, ITPK1:3621, ITPKA:4103, PLCD1:4336, INPP5B:4951, PLD4:5473, PLCG2:6186, PLCZ1:6332, PLCB2:6357, ITPKB:6505, PLCG1:7562, PLCD3:8908, SYNJ1:9506, PLCB4:10023, PLCB1:10377, ITPKC:11574, PLCH1:12329	0.117296	0.17638	0.07196	0.239723
REACTOME_TNFR2_NON_CANONICAL_NF_KB_PATHWAY	0.077025	67	MAP3K14:31, PSMF1:738, FASLG:901, CHUK:925, LTBR:948, PSMD1:1008, PSMD13:1267, UBA3:1404, TNF:1713, TNFSF15:1734, TNFRSF11B:2037, TNFSF14:2189, PSMD4:2289, BIRC3:2485, PSMD9:2633, LTB:2817, TNFRSF17:2848, TNFRSF4:2925, TNFSF13B:2929, TNFSF4:2951, EDA:3011, TNFRSF25:3033, TNFSF11:3407, RELB:3754, PSMA8:3829, PSMB4:3880, PSMD2:3993, PSMD3:4343, PSMB11:4403, PSMB9:4409, PSMB10:5084, TNFRSF12A:5221, …	0.0296292	0.0809323	0.07345	0.243659
REACTOME_HS_GAG_DEGRADATION	-0.124988	22	GPC6:159, GPC3:508, GPC4:1017, AGRN:1226, GLB1:1560, HGSNAT:2477, GPC5:2494, IDUA:2555, GPC1:2754, SDC3:4077, NAGLU:4267, HPSE2:5092, GPC2:6296, SGSH:6328, SDC1:7426, GLB1L:7457, GUSB:7670, HPSE:8433, HSPG2:9060, IDS:9833, SDC4:10095, SDC2:10440	0.042563	0.099037	0.07669	0.253343
REACTOME_REGULATION_OF_CHOLESTEROL_BIOSYNTHESIS_BY_SREBP_SREBF	-0.0964725	46	RXRA:133, ACACA:137, ACACB:487, ELOVL6:562, INSIG1:705, SCD:1205, HMGCS1:1479, GPAM:1941, IDI1:2515, SQLE:2589, CARM1:2605, HMGCR:2804, FASN:3048, SP1:3156, MTF1:3279, SC5D:3411, NCOA2:3412, MVD:3421, CREBBP:3920, FDPS:4310, TGS1:4363, SEC24C:4588, HELZ2:4731, LSS:4955, SREBF1:4982, MBTPS2:5265, SEC24D:5814, PPARA:6420, MBTPS1:6591, PMVK:6723, FDFT1:6837, MVK:7161, DHCR7:7511, NCOA1:7902, SEC24B:…	0.0238136	0.0715828	0.07771	0.254778
REACTOME_IRAK4_DEFICIENCY_TLR2_4	-0.158147	11	CD36:522, TLR2:579, LY96:678, FGG:1060, TLR4:1187, MYD88:2634, CD14:3304, S100A8:8190, FGB:9008, IRAK4:11115, BTK:12533	0.0694245	0.135874	0.07777	0.254778
REACTOME_PLATELET_HOMEOSTASIS	0.0632487	62	PDE11A:183, PTPN6:228, TRPC6:253, P2RX6:825, KCNMB3:1321, PDE1B:1669, SLC8A2:1824, PPP2R1B:2051, PDE2A:2060, GUCY1A1:2097, KCNMB2:2177, PPP2R5B:2220, ATP2A3:2471, TRPC7:2487, KCNMA1:2547, PPP2R5D:2802, P2RX5:3091, PRKG2:3237, ITPR2:3244, ITPR3:3267, P2RX1:3598, GNB3:3638, ORAI1:3797, SLC8A3:3832, P2RX7:3943, P2RX4:4205, SLC8A1:4323, TRPC3:4588, P2RX3:4783, PDE9A:4867, PPP2R5A:5311, ORAI2:5352, PD…	0.0856885	0.150601	0.0781	0.254802
KEGG_RNA_DEGRADATION	0.0821756	39	EXOSC3:100, PATL1:254, PAPOLA:585, CNOT1:612, CNOT6:682, DCP1A:923, EXOSC10:1167, SKIV2L:1708, DCP1B:2134, EDC4:2205, MPHOSPH6:2548, CNOT10:3241, XRN2:3720, ENO1:3893, CNOT3:3984, TTC37:4348, DCPS:4585, EXOSC6:5292, EXOSC2:5591, EXOSC8:5851, EXOSC9:6405, HSPD1:6412, PARN:6536, XRN1:7533, DIS3:8043, C1D:8101, PAPOLG:8221, MTREX:8631, EDC3:8833, ENO2:8846, ENO3:8893, EXOSC5:8954, CNOT4:9307, DCP2:1…	0.0761601	0.143601	0.07956	0.25747
REACTOME_METABOLISM_OF_STEROID_HORMONES	-0.110352	29	HSD17B3:95, HSD17B2:164, CYP11A1:267, CYP19A1:302, CYP17A1:1034, FDXR:1200, AKR1B1:1316, SRD5A3:2018, HSD17B1:2174, TSPO:2475, HSD17B11:2860, LHB:3469, HSD3B2:3739, HSD17B12:3904, SRD5A1:4894, HSD11B1:5667, STARD3:5851, HSD17B14:6042, STAR:6119, STARD3NL:7466, TSPOAP1:7774, SERPINA6:7950, CYP21A2:8234, HSD11B2:8395, CGA:10423, FDX2:11605, STARD6:12303, SRD5A2:12526, STARD4:12841	0.0398936	0.0979022	0.07957	0.25747
KEGG_MELANOGENESIS	0.0850123	72	CALML3:439, DVL2:773, EP300:887, WNT9B:934, WNT2B:938, KIT:982, FZD1:1059, FZD7:1138, PRKACA:1458, KITLG:1544, WNT9A:1615, MITF:1770, FZD10:1815, CREB3L2:2054, CAMK2B:2103, TCF7L1:2264, WNT2:3101, ADCY5:3130, DVL1:3169, WNT3A:3172, WNT5B:3264, MAPK3:3331, PRKCA:3376, WNT11:3423, PLCB1:3536, EDN1:3854, PLCB4:3890, TYR:3903, PRKACB:4160, CAMK2A:4284, ADCY2:4685, CALML5:4849, WNT5A:4995, FZD9:5049, …	0.0128552	0.0492452	0.08003	0.257902
REACTOME_APOPTOSIS	0.0463326	126	H1-2:44, SATB1:277, UACA:282, RIPK1:369, DBNL:670, AVEN:707, PSMF1:738, BCL2L1:753, HMGB2:881, DAPK2:896, TICAM2:899, FASLG:901, PSMD1:1008, ACIN1:1106, DNM1L:1141, PSMD13:1267, BCAP31:1460, H1-4:1540, AKT1:1545, PPP3R1:2002, TJP1:2036, OPA1:2061, XIAP:2084, PAK2:2085, APC:2213, PSMD4:2289, CDKN2A:2404, ROCK1:2463, LMNA:2496, PSMD9:2633, FNTA:2635, BMX:2729, STK26:2840, PPP3CC:2883, DSG3:2907, GS…	0.0738259	0.142272	0.08045	0.258201
REACTOME_FRS_MEDIATED_FGFR1_SIGNALING	0.118015	15	SOS1:68, FGF5:526, FGF6:1648, FGF1:1663, FGFR1:3154, FRS3:3736, KL:4047, FGF10:4145, FRS2:5970, FGF23:7193, FGF17:7610, FGF20:8252, FGF22:9642, FGF4:10685, PTPN11:13462	0.113694	0.174214	0.08084	0.258403
REACTOME_CYTOKINE_SIGNALING_IN_IMMUNE_SYSTEM	0.0467106	483	MAP3K14:31, TRIM29:52, RAG1:60, SOS1:68, PTPN14:85, EIF4E3:120, AGER:206, PTPN6:228, TRAF6:240, TIMP1:261, FOXO1:283, JUN:289, MMP2:303, FLNA:307, CCND1:313, IL17RA:340, IRF8:398, IL18:459, STAT5A:471, STAT4:481, NUP153:494, CCR2:557, PTPN9:563, NUP54:598, NCAM1:619, MAPKAPK3:648, NUP155:669, PSMF1:738, KPNA2:740, ISG20:749, BCL2L1:753, IL12A:762, MSN:765, POU2F1:864, MEF2A:892, FASLG:901, CAPZA1…	0.000560171	0.00533219	0.08166	0.259407
REACTOME_TRANSPORT_OF_MATURE_TRANSCRIPT_TO_CYTOPLASM	0.106343	57	GLE1:185, ZC3H11A:348, SLU7:435, SARNP:449, NUP153:494, NUP54:598, NUP155:669, WDR33:917, FYTTD1:1017, NUP58:1124, SRSF11:1310, SEC13:2080, NUP160:2244, NUP88:2429, THOC7:2975, THOC2:3070, NUP210:3152, SRRM1:3224, SRSF4:3396, POLDIP3:3424, RAE1:3535, NUP37:3561, NUP50:3627, NCBP1:3785, THOC5:3787, NUP214:3850, NUP188:3885, SLBP:3992, TPR:4025, NUP107:4564, FIP1L1:4644, SYMPK:4649, CPSF1:6270, DHX…	0.00558101	0.0289772	0.08182	0.259407
REACTOME_ACTIVATION_OF_KAINATE_RECEPTORS_UPON_GLUTAMATE_BINDING	0.144955	12	DLG4:409, DLG3:688, GRIK1:883, NCALD:3105, PLCB1:3536, GNB3:3638, GRIK3:5046, DLG1:5494, GRIK5:7170, PLCB2:7556, GNB5:10582, PLCB3:12795	0.0821947	0.148321	0.08214	0.259407
REACTOME_NETRIN_1_SIGNALING	0.10055	44	NTN4:99, TRPC6:253, MYO10:403, MAPK13:512, ROBO1:703, TRPC4:848, UNC5C:1024, DOCK1:1213, DSCAML1:1367, UNC5D:1798, TRPC1:2079, SLIT3:2086, RGMB:2218, TRPC7:2487, RGMA:2529, NEO1:3086, SLIT2:3887, SLIT1:4221, ABLIM3:4561, TRPC3:4588, PITPNA:4870, UNC5A:4921, ABLIM2:5068, UNC5B:5438, PTK2:6060, PLCG1:6351, SRC:6424, MAPK11:7054, AGAP2:7522, DCC:7957, TRPC5:7961, NCK1:7981, DSCAM:8068, TRIO:8314, AB…	0.0212137	0.0668167	0.08251	0.259538
REACTOME_TNFR1_INDUCED_NFKAPPAB_SIGNALING_PATHWAY	0.110134	23	OTUD7B:167, RIPK1:369, CHUK:925, USP4:1136, TNF:1713, TAB3:1772, XIAP:2084, BIRC3:2485, TRAF1:3291, USP2:3447, TAB1:3932, BIRC2:5672, TNFAIP3:5855, IKBKB:6478, SHARPIN:7044, TRADD:8225, RNF31:8840, TAB2:9060, TRAF2:10190, USP21:10862, RBCK1:10874, MAP3K7:10954, CYLD:12506	0.0676969	0.133324	0.08301	0.260074
REACTOME_MET_ACTIVATES_PTK2_SIGNALING	0.120288	30	COL11A2:264, ITGA3:792, LAMA4:890, LAMB2:1195, COL5A2:1439, LAMA2:1986, LAMA5:2129, COL1A1:3242, COL27A1:3439, LAMC2:3456, FN1:4253, LAMC3:4939, MET:4975, HGF:5424, COL2A1:5555, COL11A1:5607, COL5A3:6045, PTK2:6060, COL1A2:6383, SRC:6424, ITGA2:7305, LAMC1:7431, LAMB1:7511, COL5A1:7936, LAMA3:8071, COL3A1:8741, LAMB3:8762, COL24A1:9635, LAMA1:11460, ITGB1:11929	0.0227259	0.0693078	0.0839	0.261346
REACTOME_GROWTH_HORMONE_RECEPTOR_SIGNALING	0.136043	18	PTPN6:228, STAT5A:471, STAT1:977, GH1:1995, ADAM17:2597, IRS1:3116, SOCS1:3186, MAPK3:3331, LYN:4625, CISH:5106, STAT5B:6114, GHR:6188, SOCS2:7088, JAK2:7897, PRLR:8029, PTPN1:9372, SOCS3:10788, SH2B1:12592	0.0458138	0.102697	0.08446	0.261346
KEGG_DRUG_METABOLISM_OTHER_ENZYMES	-0.14428	20	UGT1A1:376, HPRT1:687, GMPS:907, IMPDH2:1449, UMPS:2685, CDA:3187, TPMT:3581, TK1:3598, UCK1:3638, UPP1:4222, UCK2:4725, CES5A:4763, UPB1:5839, IMPDH1:5878, XDH:6373, DPYD:7193, GUSB:7670, DPYS:8554, UCKL1:8811, ITPA:11597	0.0255937	0.0751359	0.08459	0.261346
REACTOME_SIGNALING_BY_FLT3_FUSION_PROTEINS	0.11474	14	SOS1:68, STAT5A:471, SPTBN1:492, GAB2:2197, PIM1:3340, TRIP11:4852, MYO18A:5636, GOLGB1:5727, STAT5B:6114, ETV6:7543, PIK3R1:8583, NOX4:8945, CDKN1A:9492, ZMYM2:13494	0.137318	0.185128	0.08474	0.261346
KEGG_GLYOXYLATE_AND_DICARBOXYLATE_METABOLISM	-0.156056	16	ACO1:42, GRHPR:160, CS:644, MTHFD2:680, ACO2:780, MDH1:981, GLYCTK:2805, MTHFD1L:2870, HYI:3913, MTHFD1:3929, HAO1:6061, HAO2:6956, MTHFD2L:9714, AFMID:10056, PGP:11319, MDH2:13611	0.0307611	0.0836602	0.08528	0.261401
REACTOME_MEMBRANE_TRAFFICKING	0.0342598	482	TBC1D20:12, UBAP1:34, TSG101:59, GJB7:83, PPP6C:127, COG6:143, GNS:155, BIN1:157, SNX5:181, EXOC5:213, COPZ2:215, BET1L:239, KIF26B:244, NSF:311, COPB2:318, USO1:356, VPS45:375, SYT9:389, GJA10:392, GALNT1:401, BLOC1S1:411, GJB2:421, SYT1:462, M6PR:480, KIF3C:486, SPTBN1:492, NAA35:513, AAK1:527, RIN2:575, GDI1:581, AP2M1:647, LNPEP:687, KLC3:713, CLVS1:723, SCARB2:730, COPA:761, DVL2:773, SYT8:8…	0.0114687	0.0458926	0.08542	0.261401
REACTOME_SUMOYLATION_OF_RNA_BINDING_PROTEINS	0.126281	36	PHC1:62, PHC3:317, NUP153:494, NUP54:598, NUP155:669, NUP58:1124, PHC2:1339, SEC13:2080, PCGF2:2206, NUP160:2244, CBX2:2343, NUP88:2429, NUP210:3152, SCMH1:3445, RAE1:3535, NUP37:3561, NUP50:3627, NUP214:3850, NUP188:3885, TPR:4025, NUP107:4564, CBX8:5126, NUP205:6327, NUP35:7250, NUP93:7660, RING1:8473, NUP43:9054, NOP58:9674, NUP98:10115, NUP85:10134, SEH1L:10184, AAAS:10347, NUP133:10805, NUP6…	0.00882393	0.0387664	0.0861	0.262465
REACTOME_SIGNALING_BY_NTRK2_TRKB	0.116964	16	SOS1:68, NTF4:608, GAB1:2432, DOCK3:3102, BDNF:3647, FRS3:3736, SHC1:3918, TIAM1:4647, GRIN2B:5186, FRS2:5970, NTF3:6091, PLCG1:6351, SRC:6424, PIK3R1:8583, NTRK2:13352, PTPN11:13462	0.10544	0.167756	0.08779	0.265389
REACTOME_FCERI_MEDIATED_CA_2_MOBILIZATION	0.115824	26	SOS1:68, TXK:260, ITK:469, BTK:1380, NFATC2:1809, PPP3R1:2002, TEC:2254, FCER1G:3019, ITPR2:3244, ITPR3:3267, SHC1:3918, VAV1:4613, LYN:4625, LAT:5469, NFATC3:5795, PLCG1:6351, LCP2:7009, ITPR1:7081, NFATC1:7116, FCER1A:7704, PLCG2:7727, GRAP2:8799, VAV2:11619, SYK:12180, MS4A2:12489, VAV3:12544	0.0411003	0.0985538	0.08855	0.265389
REACTOME_REGULATION_OF_MECP2_EXPRESSION_AND_ACTIVITY	0.107215	18	TBL1X:1148, PRKACA:1458, GPS2:1917, CAMK2B:2103, MOV10:3363, TNRC6C:3368, AGO1:3769, MECP2:3794, CAMK2A:4284, TNRC6B:4725, CAMK4:6181, SIN3A:7146, TNRC6A:8046, AURKB:8140, NCOR2:8295, HIPK2:10176, LBR:11602, NCOR1:11676	0.115508	0.17638	0.08857	0.265389
REACTOME_NUCLEOTIDE_SALVAGE	-0.145405	19	HPRT1:687, ADK:1427, DGUOK:1577, ADAL:1990, GMPR2:3033, CDA:3187, APRT:3302, GMPR:3538, TK1:3598, UCK1:3638, UPP1:4222, AMPD3:4722, UCK2:4725, PNP:5637, DCK:6578, AMPD2:7341, UCKL1:8811, AMPD1:9519, ADA:13257	0.0283139	0.0801264	0.08863	0.265389
REACTOME_JNK_C_JUN_KINASES_PHOSPHORYLATION_AND_ACTIVATION_MEDIATED_BY_ACTIVATED_HUMAN_TAK1	0.110547	15	TRAF6:240, TAB3:1772, MAPK9:2446, MAP2K7:3060, TAB1:3932, NOD2:4173, MAPK10:5583, NOD1:5783, UBE2V1:6274, UBE2N:6430, RIPK2:7017, IRAK2:7393, TAB2:9060, IRAK1:9584, MAP3K7:10954	0.13842	0.185815	0.08874	0.265389
REACTOME_RNA_POLYMERASE_III_TRANSCRIPTION	0.114336	28	GTF3C3:434, POU2F1:864, BRF2:1004, GTF3C2:1090, POLR2F:1548, NFIA:1642, POLR3D:2006, GTF3C4:2208, NFIC:2581, POLR3A:2923, POLR3GL:3702, TBP:4653, GTF3A:4763, SNAPC5:4980, POLR1D:5138, POLR3B:5268, GTF3C5:5901, SNAPC1:7593, CRCP:7734, BRF1:7815, POLR3E:8057, POLR1C:8165, GTF3C1:9143, SSB:9264, ZNF143:9389, POLR3C:10917, POLR3G:12269, POLR3H:13243	0.0364271	0.0938244	0.08945	0.266273
REACTOME_ACTIVATION_OF_NMDA_RECEPTORS_AND_POSTSYNAPTIC_EVENTS	0.0830796	58	LRRC7:247, CAMKK2:305, DLG4:409, DLG3:688, APBA1:729, KPNA2:740, RASGRF1:828, NBEA:894, GRIA1:1381, PRKACA:1458, RPS6KA2:1508, CAMK1:1535, RASGRF2:1752, TUBB1:2046, CAMK2B:2103, MAPK3:3331, NRG1:3359, GRIA3:3365, ACTN2:3581, KIF17:3673, PRKAA2:3846, ERBB4:4029, PRKACB:4160, RPS6KA6:4250, CAMK2A:4284, MAPT:4356, GRIN2B:5186, PRKAR2B:5319, DLG1:5494, PRKAA1:5551, PDPK1:5706, CAMKK1:5801, PRKAG2:591…	0.0289671	0.0808311	0.08971	0.266273
KEGG_PENTOSE_PHOSPHATE_PATHWAY	0.118205	22	ALDOC:32, TKT:1160, H6PD:1457, RPIA:1854, RBKS:1964, TKTL1:2352, FBP2:2561, PRPS1:2706, DERA:3239, ALDOA:3531, G6PD:3895, PGD:4813, PGM1:4880, PGLS:5168, TALDO1:5228, PFKL:7027, GPI:7686, FBP1:9177, PFKP:11030, ALDOB:12764, PFKM:13438, PGM2:13789	0.0551206	0.116206	0.09034	0.267138
REACTOME_GAP_JUNCTION_ASSEMBLY	0.141254	17	GJB7:83, GJA10:392, GJB2:421, GJA8:944, GJA4:1207, TUBB1:2046, GJB4:3346, GJC1:4195, GJD4:4814, GJD2:4927, GJA1:5502, GJB5:5623, GJA3:6973, TUBAL3:9124, GJB3:12068, GJB6:12632, GJA5:12688	0.0438729	0.101307	0.09116	0.26794
REACTOME_SIGNALING_BY_FLT3_ITD_AND_TKD_MUTANTS	0.126295	11	SOS1:68, STAT5A:471, BCL2L1:753, GAB2:2197, PIM1:3340, FLT3:5116, STAT5B:6114, PIK3R1:8583, NOX4:8945, CDKN1A:9492, PTPN11:13462	0.14707	0.192092	0.09129	0.26794
REACTOME_NERVOUS_SYSTEM_DEVELOPMENT	0.040354	382	NAB1:21, USP33:39, SOS1:68, NTN4:99, EFNA3:186, ROBO3:205, ARHGEF12:209, RPL9:227, TRPC6:253, RPL36A:266, SRGAP1:276, DPYSL5:287, MMP2:303, RELN:341, MYO10:403, DLG4:409, SPTBN1:492, MAPK13:512, FLRT3:570, TLN1:604, NCAM1:619, WWTR1:640, AP2M1:647, DLG3:688, L1CAM:693, ROBO1:703, PSMF1:738, MSN:765, NCK2:788, TRPC4:848, LIMK2:981, PSMD1:1008, UNC5C:1024, ITGA10:1079, PLXNA4:1171, DOCK1:1213, GFRA…	0.00763102	0.0355122	0.09256	0.270662
KEGG_NITROGEN_METABOLISM	-0.123149	20	GLS2:10, CA3:54, GLUD1:57, CA6:118, CPS1:563, CA4:575, CTH:741, CA2:2048, CA12:3426, CA5B:3664, CA5A:4497, CA13:5585, ASNS:7254, CA7:8075, CA9:8552, HAL:9028, AMT:10366, GLUL:12015, GLS:12651, CA14:13316	0.0567301	0.11827	0.09304	0.271061
REACTOME_SUMOYLATION_OF_CHROMATIN_ORGANIZATION_PROTEINS	0.111779	43	PHC1:62, SATB1:277, PHC3:317, NUP153:494, NUP54:598, NUP155:669, NUP58:1124, PHC2:1339, SATB2:1415, SEC13:2080, PCGF2:2206, NUP160:2244, CBX2:2343, NUP88:2429, NUP210:3152, SCMH1:3445, RAE1:3535, NUP37:3561, NUP50:3627, NUP214:3850, NUP188:3885, TPR:4025, PIAS1:4464, NUP107:4564, L3MBTL2:5095, CBX8:5126, NUP205:6327, NUP35:7250, NUP93:7660, RING1:8473, CHD3:8977, NUP43:9054, NUP98:10115, NUP85:10…	0.0113299	0.0456281	0.09404	0.272459
REACTOME_ION_TRANSPORT_BY_P_TYPE_ATPASES	-0.0901636	44	ATP1A1:81, FXYD1:92, ATP8B1:120, ATP11C:249, ATP13A5:418, ATP11B:574, ATP10B:956, ATP10A:1011, ATP8A1:1202, ATP8A2:1219, ATP11A:1310, ATP2A2:1798, ATP12A:1906, ATP13A2:1959, ATP2A1:2263, ATP4B:3343, ATP1B3:3391, ATP8B4:4360, ATP1B1:4483, ATP2B2:4807, ATP1A2:4884, ATP2B4:5180, ATP2B3:5295, ATP13A4:5307, ATP8B3:5339, SRI:5959, ATP1B2:6065, ATP2B1:6115, ATP13A1:6257, ATP9A:6748, ATP7A:7684, ATP10D:7…	0.0388151	0.0963851	0.09421	0.272459
KEGG_O_GLYCAN_BIOSYNTHESIS	0.0966758	27	GALNT1:401, ST3GAL2:811, GALNT9:1348, GALNT6:1951, GALNT13:2281, C1GALT1:3127, GALNT4:3483, GALNT14:3704, GCNT4:3709, ST3GAL1:3717, GALNT17:4218, C1GALT1C1:5135, B4GALT5:5728, GALNT7:6021, GALNT2:6321, GALNTL6:6668, GALNT11:6759, GALNT16:6905, GALNT18:6935, GALNT5:7069, GALNT3:7355, GALNT10:7390, GALNT15:7756, GCNT3:11009, GALNTL5:11576, GALNT12:11673, GCNT1:12850	0.0823507	0.148321	0.09506	0.272716
REACTOME_GLUTAMATE_AND_GLUTAMINE_METABOLISM	-0.141755	13	GLS2:10, GOT2:30, GLUD1:57, PYCR2:421, KYAT1:1509, PYCR1:1849, PYCR3:1871, ALDH18A1:1922, OAT:7205, RIMKLB:11641, GLUL:12015, RIMKLA:12336, GLS:12651	0.0768923	0.143601	0.09576	0.272716
REACTOME_ASPARTATE_AND_ASPARAGINE_METABOLISM	-0.147881	10	GOT2:30, GOT1:318, ASPG:696, NAALAD2:1195, SLC25A12:3811, FOLH1:4838, ASNS:7254, GADL1:7965, SLC25A13:9548, ASPA:11987	0.105474	0.167756	0.09591	0.272716
REACTOME_INTERLEUKIN_7_SIGNALING	0.132219	19	RAG1:60, STAT5A:471, IL7R:1441, RAG2:1662, SMARCA4:2621, BRWD1:2663, IRS1:3116, SOCS1:3186, CISH:5106, HGF:5424, IL7:5513, STAT5B:6114, IL2RG:6638, SOCS2:7088, JAK1:7505, PIK3R1:8583, PIK3R2:10257, PIK3R3:10608, JAK3:11948	0.046148	0.102809	0.09603	0.272716
REACTOME_DOWNSTREAM_SIGNALING_EVENTS_OF_B_CELL_RECEPTOR_BCR	0.0707562	46	BCL10:309, PSMF1:738, CHUK:925, PSMD1:1008, PSMD13:1267, NFATC2:1809, CARD11:1830, PPP3R1:2002, PSMD4:2289, MALT1:2546, RASGRP3:2604, PSMD9:2633, NFKBIB:2660, PSMA8:3829, PSMB4:3880, PSMD2:3993, PSMD3:4343, NFKBIA:4373, PSMB11:4403, PSMB9:4409, PSMB10:5084, PSMB2:5295, NFKB1:5375, NFKBIE:5710, NFATC3:5795, PSMD8:5898, IKBKB:6478, PRKCB:6560, NFATC1:7116, PSMD12:7927, PSME2:8228, PSMD6:8496, PSMB7…	0.0973879	0.161542	0.09654	0.272716
KEGG_HISTIDINE_METABOLISM	-0.103783	27	ALDH1B1:26, UROC1:111, AOC1:115, MAOA:673, LCMT2:894, ALDH3A2:1123, ALDH2:1587, LCMT1:2547, FTCD:2903, TRMT11:3196, ALDH3B1:3852, MAOB:4251, ALDH7A1:4272, HEMK1:4526, METTL2B:5746, ALDH3A1:5826, AMDHD1:5923, ALDH1A3:6641, ALDH9A1:6755, METTL6:8389, HAL:9028, HDC:9203, DDC:9749, CNDP1:11234, ASPA:11987, HNMT:12230, BUD23:12248	0.0621926	0.126039	0.09683	0.272716
REACTOME_SIGNALING_BY_HEDGEHOG	0.0572591	103	ULK3:113, IFT172:390, PSMF1:738, MKS1:787, SUFU:815, PSMD1:1008, OFD1:1081, BOC:1234, PSMD13:1267, SYVN1:1357, PTCH1:1454, PRKACA:1458, EVC:1556, GLI2:1666, TUBB1:2046, PSMD4:2289, WDR35:2424, CDON:2474, ARRB2:2566, ADAM17:2597, PSMD9:2633, KIF7:2659, GRK2:2791, DYNC2H1:2920, TULP3:2931, TTC21B:3036, ADCY5:3130, IFT57:3178, PSMA8:3829, PSMB4:3880, ERLEC1:3896, KIF3A:3974, PSMD2:3993, PRKACB:4160,…	0.0454665	0.10238	0.09689	0.272716
REACTOME_CA2_PATHWAY	0.0986052	34	GNAT2:519, PPP3R1:2002, TCF7L1:2264, AXIN2:2962, PRKG2:3237, ITPR2:3244, ITPR3:3267, MOV10:3363, TNRC6C:3368, PRKCA:3376, WNT11:3423, PLCB1:3536, GNB3:3638, PDE6B:3640, AGO1:3769, CAMK2A:4284, TNRC6B:4725, PDE6A:4789, WNT5A:4995, MYC:5500, FZD6:6313, LEF1:6554, TCF7:6810, ITPR1:7081, NFATC1:7116, PLCB2:7556, TNRC6A:8046, FZD5:9613, FZD4:10219, GNB5:10582, TCF7L2:10858, MAP3K7:10954, FZD3:10969, P…	0.0468675	0.103677	0.09741	0.272716
REACTOME_NOTCH_HLH_TRANSCRIPTION_PATHWAY	0.103445	23	SNW1:246, NOTCH2:493, KAT2A:626, HDAC5:659, NOTCH4:716, MAML2:870, TBL1X:1148, NOTCH3:1655, HDAC7:1718, MAML3:2481, RBPJ:3830, HDAC9:6645, HDAC11:6914, NOTCH1:8247, NCOR2:8295, KAT2B:8758, HDAC10:9978, CREBBP:9993, MAML1:10196, HDAC4:10676, HDAC6:11361, NCOR1:11676, HDAC8:12513	0.0861532	0.150601	0.09792	0.272716
REACTOME_THROMBIN_SIGNALLING_THROUGH_PROTEINASE_ACTIVATED_RECEPTORS_PARS	0.110688	14	GNA14:818, GNA12:1272, ARRB2:2566, MAPK3:3331, GNB3:3638, GNA13:4170, F2:6343, SRC:6424, F2RL3:6574, ARRB1:7129, F2RL2:7443, F2R:8781, GNA15:8966, GNB5:10582	0.151751	0.195363	0.0982	0.272716
REACTOME_PURINE_RIBONUCLEOSIDE_MONOPHOSPHATE_BIOSYNTHESIS	-0.185695	10	ADSS2:373, GMPS:907, IMPDH2:1449, ADSL:1610, PPAT:2822, PFAS:3381, ADSS1:4673, IMPDH1:5878, PAICS:7515, ATIC:13703	0.0420695	0.0986841	0.09823	0.272716
REACTOME_SUMOYLATION_OF_TRANSCRIPTION_COFACTORS	0.103784	33	PHC1:62, PHC3:317, EP300:887, PHC2:1339, PCGF2:2206, CBX2:2343, NRIP1:2386, PIAS3:2536, PARK7:2623, TOPORS:3188, SCMH1:3445, NPM1:4308, PIAS1:4464, CTBP1:4703, UHRF2:5015, CBX8:5126, MBD1:5440, ING2:5780, NCOA1:6011, PPARGC1A:6276, ZNF131:6636, MRTFA:7145, SIN3A:7146, DDX17:7764, DAXX:7986, NCOR2:8295, RING1:8473, PIAS4:8798, CREBBP:9993, HIPK2:10176, NCOA2:10501, PIAS2:12827, TRIM28:12870	0.0393021	0.0970103	0.09924	0.272716
REACTOME_CELLULAR_HEXOSE_TRANSPORT	-0.141261	16	SLC5A2:155, SLC2A2:588, SLC5A9:912, SLC2A6:913, SLC2A9:1523, SLC2A4:1887, SLC2A8:3177, SLC2A10:3910, SLC45A3:4568, SLC2A12:4678, SLC50A1:6270, SLC2A1:6459, SLC2A14:9032, FGF21:10112, SLC2A3:11488, SLC5A10:11826	0.0505415	0.108741	0.09938	0.272716
KEGG_GALACTOSE_METABOLISM	-0.118886	23	PGM2:124, HK1:175, PFKM:475, B4GALT1:513, HK2:1065, AKR1B1:1316, GLB1:1560, LCT:1866, GANC:2827, LALBA:2848, PFKP:2883, G6PC2:4716, GLA:5841, PFKL:6886, HK3:6894, UGP2:7173, B4GALT2:7189, GALT:7755, PGM1:9033, GALE:11520, GALK1:11908, GCK:12034, GALK2:12127	0.0485866	0.105256	0.09945	0.272716
REACTOME_ER_TO_GOLGI_ANTEROGRADE_TRANSPORT	0.0574777	106	TBC1D20:12, PPP6C:127, COG6:143, COPZ2:215, BET1L:239, NSF:311, COPB2:318, USO1:356, SPTBN1:492, COPA:761, CAPZA1:918, TMED10:1137, NAPG:1145, COPZ1:1193, GRIA1:1381, COPB1:1647, SEC31A:1766, GBF1:1825, CTSC:1829, TUBB1:2046, SEC13:2080, DCTN3:2160, LMAN2:2506, BET1:2680, ANK2:2772, GOSR2:2864, DCTN6:3094, YKT6:3124, SEC22C:3138, ANK3:3201, SEC24A:3272, SPTBN5:3669, COG8:3676, ANKRD28:3805, CAPZB…	0.0416895	0.0986841	0.09948	0.272716
REACTOME_SIGNALING_BY_FGFR_IN_DISEASE	0.0790988	37	SOS1:68, GTF2F1:173, STAT5A:471, FGF5:526, STAT1:977, POLR2F:1548, FGF6:1648, FGF1:1663, GAB2:2197, GAB1:2432, CEP43:2717, FGFR1:3154, FGFR2:3453, NCBP1:3785, FGF10:4145, FGFR4:5100, MYO18A:5636, FRS2:5970, STAT5B:6114, PLCG1:6351, ERLIN2:6837, TRIM24:7139, FGF23:7193, FGFR3:7586, FGF17:7610, FGF20:8252, LRRFIP1:8282, PIK3R1:8583, CNTRL:9366, FGF22:9642, CUX1:10624, FGF4:10685, FGFR1OP2:11679, BC…	0.0963382	0.160541	0.10053	0.274641
REACTOME_RNA_POLYMERASE_II_TRANSCRIPTION_TERMINATION	0.118393	36	ZC3H11A:348, SLU7:435, SARNP:449, PAPOLA:585, WDR33:917, FYTTD1:1017, CLP1:1214, SRSF11:1310, CPSF7:1576, LSM10:2856, THOC7:2975, THOC2:3070, SRRM1:3224, SRSF4:3396, POLDIP3:3424, NCBP1:3785, THOC5:3787, CSTF2:3792, SLBP:3992, FIP1L1:4644, SYMPK:4649, CPSF1:6270, DHX38:6278, THOC6:6983, PCF11:7138, CPSF2:8395, THOC1:8613, UPF3B:9013, CDC40:9406, THOC3:10113, SRSF6:10449, CASC3:11396, CPSF3:11509,…	0.0140796	0.0523397	0.1018	0.277151
REACTOME_SIGNALING_BY_PTK6	0.0738304	37	CCND1:313, DOCK1:1213, AKT1:1545, BCAR1:1726, KHDRBS3:2578, STAP2:2629, CBL:2732, ERBB3:2824, EGF:3209, NRG1:3359, NR3C1:3952, ERBB4:4029, DOK1:4288, EPAS1:4670, GPNMB:4731, ELMO2:4743, BTC:5061, EGFR:5182, HIF1A:5650, ERBB2:5718, EREG:6088, PXN:6233, ARAP1:6998, PELP1:7378, NRG2:7642, NRG3:7863, RASA1:7928, SFPQ:8038, LRRK2:8507, PTPN1:9372, CCNE1:9690, CDK4:10605, ELMO1:10784, SOCS3:10788, CDKN…	0.120635	0.17638	0.10259	0.278342
REACTOME_SIGNALING_BY_GPCR	0.0401456	545	SOS1:68, GRM6:78, GABBR1:84, CCKBR:93, PF4:128, RHO:129, GPR37:134, CXCL6:166, PDE11A:183, TIAM2:190, OPN1LW:207, ARHGEF12:209, HCRTR2:217, TRPC6:253, CAMKK2:305, RXFP3:312, P2RY1:334, CHRM1:410, TACR2:457, NPY2R:477, PDE7B:478, GRM2:505, GNAT2:519, GPR83:541, CCR2:557, GAL:558, PIK3R6:583, PROK1:588, CXCR5:617, HTR1F:620, FGD1:630, PLPPR2:718, KPNA2:740, F2RL1:745, CCR4:758, HTR1A:781, PROK2:782…	0.00170535	0.0113976	0.10363	0.280201
REACTOME_RAC3_GTPASE_CYCLE	0.0564846	79	ARHGAP42:4, FERMT2:314, SWAP70:426, PGRMC2:802, AMIGO2:900, MCAM:972, STBD1:1259, EPHA2:1432, ARHGDIB:1526, VRK2:1541, WASF1:1633, ARHGAP21:1837, VANGL1:1989, ARHGAP32:2004, PAK2:2085, NCF2:2192, JAG1:2353, SLITRK3:2359, LEMD3:2794, OPHN1:2990, YKT6:3124, ARHGAP6:3289, ABI2:3391, NHS:3422, ARHGAP15:3670, SRGAP2:3847, RACGAP1:4078, SYDE1:4305, NCF1:4521, SLITRK5:4610, TIAM1:4647, WASF2:4728, ESYT1…	0.0835086	0.148623	0.10438	0.281266
REACTOME_PYROPTOSIS	-0.10239	19	GSDME:721, ELANE:1101, CHMP3:1309, CHMP6:1463, CHMP4A:2233, BAK1:2867, CASP3:3000, IL1A:3339, BAX:3370, IL1B:4050, TP53:4393, CHMP7:5085, CASP1:7681, IRF2:8047, TP63:8936, IRF1:9534, GSDMD:10683, CHMP4C:10955, IL18:13454	0.122544	0.17638	0.10541	0.28249
REACTOME_SYNTHESIS_SECRETION_AND_DEACYLATION_OF_GHRELIN	0.105587	16	BCHE:974, IGF1:975, CRHR2:1365, GCG:1711, GH1:1995, ACHE:3374, UCN:3772, LEP:4484, PCSK1:4532, KLF4:5312, SEC11A:5474, PLA2G7:6686, MBOAT4:11683, SPCS2:12257, GHRL:12659, INS:12756	0.143865	0.19028	0.10555	0.28249
REACTOME_REGULATION_OF_COMMISSURAL_AXON_PATHFINDING_BY_SLIT_AND_ROBO	0.175811	10	ROBO3:205, ROBO1:703, SLIT3:2086, SLIT2:3887, NELL2:4042, ROBO2:4110, SLIT1:4221, SRC:6424, DCC:7957, NTN1:12835	0.0542765	0.114811	0.10808	0.288284
REACTOME_SIGNALING_BY_NOTCH4	0.0733957	49	SNW1:246, NOTCH2:493, KAT2A:626, NOTCH4:716, PSMF1:738, MAML2:870, EP300:887, PSMD1:1008, HEY2:1133, PSMD13:1267, AKT1:1545, PSMD4:2289, JAG1:2353, DLL4:2472, MAML3:2481, PSMD9:2633, RBPJ:3830, PSMB4:3880, PSMD2:3993, FLT4:4306, PSMD3:4343, PSMB9:4409, PSMB10:5084, PSMB2:5295, PSMD8:5898, HES5:6285, PSEN1:7723, APH1B:7770, PSMD12:7927, PSME2:8228, NOTCH1:8247, PSMD6:8496, PSMB7:8709, KAT2B:8758, …	0.0760058	0.143601	0.10865	0.288829
REACTOME_SIGNALING_BY_ERBB2_ECD_MUTANTS	0.122154	11	SOS1:68, GAB1:2432, EGF:3209, SHC1:3918, ERBIN:5093, EGFR:5182, ERBB2:5718, PLCG1:6351, CDC37:7209, PIK3R1:8583, HSP90AA1:11805	0.160789	0.200824	0.10914	0.289062
REACTOME_SIGNALING_BY_NTRK3_TRKC	0.125187	12	SOS1:68, PTPRO:680, NTRK3:2867, IRS1:3116, SHC1:3918, NELFB:3978, NTF3:6091, PLCG1:6351, SRC:6424, PIK3R1:8583, BAX:10543, PTPRS:11703	0.133339	0.182904	0.10947	0.289062
REACTOME_RHOJ_GTPASE_CYCLE	-0.0601948	48	PAK3:186, WWP2:570, SNAP23:655, STEAP3:752, ARHGEF7:911, TFRC:1048, FNBP1:1057, SLC4A7:1136, ARHGAP5:1694, WASL:2569, OCRL:2757, STOM:2803, PAK4:2984, PAK1:3488, PIK3R2:3656, SCRIB:3666, ARHGAP1:3944, WAS:3982, CAV1:3991, DEPDC1B:4417, PREX1:4423, PIK3R1:5330, GIT1:5506, CDC42BPB:5525, TRIO:5599, NIPSNAP2:5771, ARHGAP26:5776, TMPO:5835, VAMP3:6206, GIT2:6487, ARL13B:6737, MPP7:6892, DOCK8:6969, D…	0.149761	0.193847	0.1117	0.293968
KEGG_LONG_TERM_POTENTIATION	0.0828021	48	CALML3:439, EP300:887, PPP1CA:1332, GRIA1:1381, PPP3R2:1446, PRKACA:1458, RPS6KA2:1508, PPP3R1:2002, CAMK2B:2103, PPP3CC:2883, ITPR2:3244, ITPR3:3267, MAPK3:3331, GRM5:3347, PRKCA:3376, PLCB1:3536, PLCB4:3890, CACNA1C:4041, PRKACB:4160, RPS6KA6:4250, CAMK2A:4284, CALML5:4849, PRKCG:5085, GRIN2B:5186, PPP1R12A:5620, BRAF:5861, CAMK4:6181, PRKCB:6560, RAPGEF3:6608, ADCY1:6742, ITPR1:7081, GRIN2C:74…	0.0475534	0.104095	0.1121	0.29404
REACTOME_HIV_INFECTION	0.0512972	154	UBAP1:34, TSG101:59, GTF2F1:173, TAF4B:255, CCNT2:343, NUP153:494, NUP54:598, NELFE:644, AP2M1:647, NUP155:669, PSIP1:676, PSMF1:738, GTF2A1:798, PSMD1:1008, TAF10:1062, NUP58:1124, CD28:1251, ATP6V1H:1263, PSMD13:1267, POLR2F:1548, CDK7:1703, VPS37B:1762, TAF2:1820, TAF11:1938, GTF2E1:2015, SEC13:2080, PAK2:2085, ERCC3:2188, NUP160:2244, GTF2H4:2265, PSMD4:2289, LCK:2414, NUP88:2429, TCEA1:2514,…	0.0289359	0.0808311	0.11306	0.295576
REACTOME_METABOLISM_OF_NUCLEOTIDES	-0.0840447	86	TYMS:72, ADSS2:373, NME4:654, HPRT1:687, ENTPD5:737, AK4:794, GMPS:907, AGXT2:1103, ADK:1427, IMPDH2:1449, NME1:1454, DGUOK:1577, ADSL:1610, NUDT16:1916, ADAL:1990, DCTPP1:2246, NT5E:2484, CTPS1:2560, ADPRM:2568, SAMHD1:2593, AK8:2636, UMPS:2685, RRM2B:2714, PPAT:2822, AK6:2869, CAD:3025, GMPR2:3033, NT5C3A:3081, CDA:3187, ENTPD1:3276, APRT:3302, PFAS:3381, AK9:3435, GMPR:3538, TK1:3598, GSR:3635…	0.00723919	0.0344545	0.11451	0.297891
REACTOME_NUCLEAR_ENVELOPE_BREAKDOWN	0.101113	46	NUP153:494, NUP54:598, NUP155:669, NEK9:959, LPIN1:1047, NUP58:1124, VRK2:1541, VRK1:1706, SEC13:2080, NUP160:2244, NUP88:2429, LMNA:2496, LEMD3:2794, NUP210:3152, PRKCA:3376, RAE1:3535, NUP37:3561, NUP50:3627, NUP214:3850, NUP188:3885, TPR:4025, LEMD2:4187, NUP107:4564, CCNB2:4753, PLK1:5420, CCNB1:5490, LMNB1:6111, NUP205:6327, PRKCB:6560, LPIN2:7243, NUP35:7250, NUP93:7660, EMD:7921, TMPO:8078…	0.0178446	0.0605988	0.1147	0.297891
REACTOME_RNA_POLYMERASE_II_TRANSCRIPTION	0.0508214	748	PRMT6:14, KMT2A:16, PHC1:62, CTSK:74, RABGGTB:97, MLLT3:114, PF4:128, ARID2:171, GTF2F1:173, HNF4A:208, SMAD7:218, MED4:231, CDKN2B:241, SNW1:246, TAF4B:255, HIPK1:278, FOXO1:283, JUN:289, CCND1:313, PHC3:317, CCNT2:343, ZC3H11A:348, POU2F2:396, CITED2:419, SLU7:435, SARNP:449, NPPA:455, CRADD:475, EAF1:476, MSX2:484, SESN3:489, NOTCH2:493, FKBP5:529, NR2E3:530, IWS1:532, PAPOLA:585, NR2C1:590, R…	4.41e-06	0.000106576	0.11544	0.29883
REACTOME_SIGNALING_BY_RHO_GTPASES_MIRO_GTPASES_AND_RHOBTB3	0.0307025	517	ARHGAP42:4, PEAK1:29, RHOJ:45, SOS1:68, RHOD:72, SH3RF1:139, TIAM2:190, ARHGEF12:209, SRGAP1:276, UACA:282, FLNA:307, FERMT2:314, IQGAP1:330, CENPH:386, DLG4:409, UBXN11:422, SWAP70:426, PRAG1:430, SPTBN1:492, NCKIPSD:547, SHKBP1:566, FGD1:630, PLEKHG1:685, KLC3:713, GFOD1:739, DNMBP:760, DVL2:773, NCK2:788, PGRMC2:802, STK38:821, DLC1:844, AMIGO2:900, MCAM:972, LIMK2:981, DOCK7:1016, ZAP70:1045,…	0.0192266	0.063241	0.11804	0.304562
REACTOME_METABOLISM_OF_RNA	0.0608758	412	SNUPN:26, CWC27:76, EXOSC3:100, GTF2F1:173, DHX16:180, GLE1:185, RPP25:211, RPL9:227, UTP3:245, SNW1:246, PATL1:254, RPL36A:266, NOC4L:325, ZC3H11A:348, SLU7:435, NAT10:437, SARNP:449, NUP153:494, ZCRB1:501, RIOK2:502, HSPB1:559, PAPOLA:585, NUP54:598, CNOT1:612, FTSJ3:654, NUP155:669, CNOT6:682, RIOK1:694, UTP20:705, PSMF1:738, ZBTB8OS:767, PRCC:805, AQR:827, ADAT3:871, HNRNPD:897, CWC22:906, WD…	3.02e-05	0.000513074	0.11951	0.304626
REACTOME_RAB_GERANYLGERANYLATION	0.0558643	33	RAB29:53, RABGGTB:97, RAB5C:1069, RAB2B:1420, RAB27B:1622, RAB15:2443, RAB38:2801, RAB3D:2960, CHML:2992, RAB7B:3112, RAB17:3375, RAB37:3381, RABGGTA:3819, RAB3C:5458, RAB18:5716, RAB33B:6152, CHM:6537, RAB19:6778, RAB26:6869, RAB43:7702, RAB42:8308, RAB32:8348, RAB13:8826, RAB34:9018, RAB20:9109, RAB21:9163, RAB23:9968, RAB3B:10201, RAB9A:10941, RAB25:11070, RAB36:12496, RAB27A:13273, RAB31:13657	0.267261	0.260723	0.11997	0.304626
REACTOME_RUNX3_REGULATES_NOTCH_SIGNALING	0.136665	12	SNW1:246, KAT2A:626, MAML2:870, EP300:887, JAG1:2353, MAML3:2481, RBPJ:3830, NOTCH1:8247, KAT2B:8758, CREBBP:9993, MAML1:10196, RUNX3:13489	0.101277	0.166128	0.12022	0.304626
REACTOME_PROCESSING_OF_CAPPED_INTRON_CONTAINING_PRE_MRNA	0.0795016	131	CWC27:76, GTF2F1:173, DHX16:180, GLE1:185, SNW1:246, ZC3H11A:348, SLU7:435, SARNP:449, NUP153:494, ZCRB1:501, PAPOLA:585, NUP54:598, NUP155:669, PRCC:805, AQR:827, HNRNPD:897, CWC22:906, WDR33:917, FYTTD1:1017, NUP58:1124, ISY1:1147, CLP1:1214, SRSF11:1310, POLR2F:1548, HNRNPM:1553, CPSF7:1576, SF3A1:1806, TFIP11:1930, SEC13:2080, CCAR1:2133, NUP160:2244, CD2BP2:2391, NUP88:2429, SF3B2:2518, PQBP…	0.00176728	0.0116872	0.12024	0.304626
REACTOME_SIGNALING_BY_ERBB2_IN_CANCER	0.0964255	20	SOS1:68, GAB1:2432, ERBB3:2824, EGF:3209, NRG1:3359, SHC1:3918, ERBB4:4029, BTC:5061, ERBIN:5093, EGFR:5182, PTPN12:5199, ERBB2:5718, EREG:6088, PLCG1:6351, CDC37:7209, NRG2:7642, NRG3:7863, PIK3R1:8583, HSP90AA1:11805, HBEGF:13854	0.135722	0.183764	0.12031	0.304626
REACTOME_SIGNALING_BY_BRAF_AND_RAF1_FUSIONS	0.0572143	47	IQGAP1:330, TLN1:604, KSR2:686, KIAA1549:1191, PAPSS1:1486, FAM114A2:1792, ITGB3:1814, CAMK2B:2103, LMNA:2496, ARRB2:2566, CSK:2891, TRAK1:2949, VCL:2993, CNKSR2:3221, PEBP1:3234, MAPK3:3331, ESRP1:3532, AGK:4001, FN1:4253, CAMK2A:4284, FGB:4905, KSR1:5497, CNKSR1:5646, BRAF:5861, SND1:5957, SRC:6424, ARRB1:7129, TRIM24:7139, AP3B1:7696, JAK2:7897, MARK3:8170, RAF1:8339, MAP2K2:8447, KDM7A:8677, …	0.17548	0.209981	0.12038	0.304626
REACTOME_SYNTHESIS_OF_SUBSTRATES_IN_N_GLYCAN_BIOSYTHESIS	-0.0590423	57	FCSK:150, ST6GAL1:216, GFPT1:392, DPM2:537, DPM1:596, ST3GAL6:934, DOLPP1:1084, CMAS:1339, GMDS:1402, GLB1:1560, GMPPB:1574, NANS:1738, NEU4:1761, ST6GALNAC6:1964, SRD5A3:2018, SLC35C1:2344, CTSA:3221, NEU1:3295, MVD:3421, SLC17A5:3589, ST6GALNAC4:3846, ST3GAL5:3994, ST6GAL2:4044, SLC35A1:4463, GNPNAT1:4529, NEU3:4574, FPGT:4939, ST3GAL4:5225, NPL:5698, ST8SIA3:5997, ST8SIA2:6174, ALG5:6414, ST6G…	0.123873	0.17638	0.12152	0.306528
REACTOME_POST_TRANSLATIONAL_PROTEIN_MODIFICATION	0.0307419	1042	TBC1D20:12, WSB1:38, USP33:39, RAB29:53, GFPT2:61, PHC1:62, SAE1:64, NTNG1:75, RABGGTB:97, TOP2A:111, PPP6C:127, COG6:143, OTUD7B:167, COPZ2:215, SMAD7:218, BET1L:239, TRAF6:240, TIMP1:261, SATB1:277, BCL10:309, SPACA4:310, NSF:311, PHC3:317, COPB2:318, ADAMTS10:322, DPH5:336, USO1:356, ADAMTS7:362, ADAMTS19:364, RIPK1:369, GALNT1:401, SPTBN1:492, NUP153:494, THSD4:511, SBSPON:517, EVA1A:520, FBX…	0.00131427	0.00938273	0.12245	0.307389
REACTOME_SIGNALING_BY_FGFR3	0.0898865	22	SOS1:68, FGF5:526, FGF1:1663, GAB1:2432, CBL:2732, MAPK3:3331, SPRY2:3622, FRS3:3736, SHC1:3918, BRAF:5861, FRS2:5970, PLCG1:6351, SRC:6424, FGF23:7193, GALNT3:7355, FGFR3:7586, FGF17:7610, FGF20:8252, PIK3R1:8583, FGF4:10685, MKNK1:11567, PTPN11:13462	0.144718	0.190605	0.12264	0.307389
REACTOME_ACTIVATION_OF_THE_MRNA_UPON_BINDING_OF_THE_CAP_BINDING_COMPLEX_AND_EIFS_AND_SUBSEQUENT_BINDING_TO_43S	-0.102329	16	EIF3J:1135, EIF3F:1358, EIF4B:2450, EIF3G:3013, EIF2S2:3218, EIF3B:3313, EIF3H:3397, EIF4G1:4969, EIF4H:5433, EIF3C:5744, EIF4E:6486, RPS3:6494, EIF3A:7498, EIF4EBP1:9475, RPS27L:10557, EIF3L:11336	0.156645	0.197404	0.12395	0.30969
REACTOME_TRANSCRIPTIONAL_REGULATION_BY_RUNX3	0.0585405	65	SNW1:246, CCND1:313, KAT2A:626, WWTR1:640, PSMF1:738, MAML2:870, EP300:887, PSMD1:1008, PSMD13:1267, FOXO3:1729, YAP1:1750, RORC:2075, TEAD4:2200, MDM2:2203, TCF7L1:2264, PSMD4:2289, JAG1:2353, CDKN2A:2404, TEAD3:2437, MAML3:2481, PSMD9:2633, ZFHX3:3069, CCN2:3678, RBPJ:3830, PSMB4:3880, PSMD2:3993, TGFB1:4293, PSMD3:4343, PSMB9:4409, PSMB10:5084, PSMB2:5295, MYC:5500, PSMD8:5898, SRC:6424, SMURF…	0.103442	0.167173	0.12475	0.310018
REACTOME_MECP2_REGULATES_NEURONAL_RECEPTORS_AND_CHANNELS	0.0999919	15	FKBP5:529, OPRM1:1088, OPRK1:1244, PTPN4:2250, SLC2A3:2425, MECP2:3794, TRPC3:4588, MET:4975, GRIN2B:5186, SIN3A:7146, NOTCH1:8247, PTPN1:9372, GRIN2A:11350, GRIA2:11534, GPRIN1:11862	0.180171	0.213166	0.12516	0.310018
REACTOME_FRS_MEDIATED_FGFR4_SIGNALING	0.120318	13	SOS1:68, KLB:629, FGF6:1648, FGF1:1663, FRS3:3736, FGF19:4437, FGFR4:5100, FRS2:5970, FGF23:7193, FGF17:7610, FGF20:8252, FGF4:10685, PTPN11:13462	0.133226	0.182904	0.12594	0.310018
KEGG_AMYOTROPHIC_LATERAL_SCLEROSIS_ALS	-0.069839	44	GRIN2D:360, CASP9:600, CAT:723, TOMM40L:905, NEFL:1353, CHP2:1810, NOS1:2009, PRPH:2083, MAPK12:2126, GRIA2:2379, GPX1:2383, GRIN2A:2563, MAP3K5:2813, BAD:2839, TOMM40:2965, CASP3:3000, SLC1A2:3201, NEFM:3246, BAX:3370, APAF1:4079, TNFRSF1B:4081, SOD1:4140, TP53:4393, GRIN1:4835, BCL2:5089, DAXX:5927, GRIN2C:6448, MAPK11:6859, CASP1:7681, MAP2K3:7973, MAP2K6:8000, CCS:8199, ALS2:8707, GRIN2B:8727…	0.109511	0.170297	0.12608	0.310018
REACTOME_RUNX2_REGULATES_BONE_DEVELOPMENT	0.103624	23	WWTR1:640, HEY2:1133, SATB2:1415, GLI2:1666, YAP1:1750, COL1A1:3242, MAPK3:3331, RBM14:3429, UCMA:3894, RB1:3919, RUNX2:3979, GLI3:5334, BGLAP:5411, SMAD6:6401, SRC:6424, IHH:6548, ZNF521:6612, SP7:8640, HEY1:8867, HDAC4:10676, HDAC6:11361, ABL1:11832, YES1:13713	0.0856087	0.150601	0.12662	0.310018
REACTOME_RET_SIGNALING	0.0778598	35	SOS1:68, GFRA3:1222, PRKACA:1458, GAB2:2197, GFRA2:2291, GAB1:2432, PDLIM7:2841, RET:2995, PRKCA:3376, SHC1:3918, DOK2:4027, GRB10:4088, PRKACB:4160, GDNF:4241, ARTN:4256, SHC3:4286, DOK1:4288, DOK4:5870, FRS2:5970, PLCG1:6351, SRC:6424, PIK3CB:6664, DOK6:7652, PIK3CD:7669, DOK5:8114, GRB7:8329, PIK3R1:8583, MAPK7:8851, RAP1GAP:9936, PIK3R2:10257, PSPN:10596, PIK3R3:10608, GFRA1:11592, GFRA4:1205…	0.111348	0.171678	0.12672	0.310018
REACTOME_NEURONAL_SYSTEM	0.0632767	322	KCND2:11, CHRNA3:73, GABBR1:84, GRIP1:153, LRRC7:247, KCNJ5:269, CAMKK2:305, NSF:311, SIPA1L1:349, KCND3:350, EPB41L5:351, KCNN3:357, SYT9:389, GJA10:392, DLG4:409, NPTN:442, SYT1:462, KCNK13:488, KCNC2:491, CACNG4:535, DNAJC5:636, CACNA2D3:642, AP2M1:647, DBNL:670, EPB41L2:672, HOMER2:674, KCNH3:681, GABRB1:683, DLG3:688, APBA1:729, KPNA2:740, SLITRK6:813, RASGRF1:828, EPB41L1:831, KCNV2:839, PP…	0.000115472	0.0014805	0.12683	0.310018
REACTOME_REGULATION_OF_KIT_SIGNALING	0.130508	14	SOS1:68, PTPN6:228, KIT:982, KITLG:1544, LCK:2414, CBL:2732, SOCS1:3186, PRKCA:3376, LYN:4625, SRC:6424, SH2B3:8907, SOCS6:11754, SH2B2:13527, YES1:13713	0.0910198	0.155512	0.1288	0.311348
REACTOME_TRANSCRIPTIONAL_REGULATION_BY_SMALL_RNAS	0.108246	31	NUP153:494, NUP54:598, NUP155:669, IPO8:789, NUP58:1124, POLR2F:1548, SEC13:2080, NUP160:2244, NUP88:2429, NUP210:3152, RAE1:3535, NUP37:3561, NUP50:3627, AGO1:3769, NUP214:3850, NUP188:3885, TPR:4025, NUP107:4564, NUP205:6327, NUP35:7250, NUP93:7660, TNRC6A:8046, NUP43:9054, NUP98:10115, NUP85:10134, SEH1L:10184, AAAS:10347, NUP133:10805, NUP62:12156, NUP42:12387, NDC1:12918	0.0371866	0.0938244	0.12891	0.311348
REACTOME_CHONDROITIN_SULFATE_BIOSYNTHESIS	0.104547	20	CHST3:496, CSPG4:1003, CHST13:1499, DCN:2602, VCAN:3087, CHST11:3667, CHST7:3796, CHPF2:4845, CHSY3:4855, BCAN:5525, CHST9:5822, CSPG5:5949, BGN:6154, CHST15:6286, CSGALNACT1:6431, CHSY1:7367, CHST12:9766, CHPF:9917, CSGALNACT2:12013, NCAN:12074	0.105755	0.167777	0.12923	0.311348
REACTOME_ION_CHANNEL_TRANSPORT	-0.0627776	156	CLCNKB:32, TRPM6:35, ANO6:80, ATP1A1:81, CLCNKA:87, FXYD1:92, TRPA1:102, ATP8B1:120, ASIC5:158, BSND:208, TRPM2:231, ATP11C:249, SCNN1B:277, CLCA1:288, ATP6V1C2:293, ATP13A5:418, TRPV5:456, ATP6V0A4:568, ATP11B:574, TRPV6:663, CLCN2:824, CLCN6:863, ANO1:900, WNK4:941, SCNN1G:954, ATP10B:956, ATP10A:1011, CLCN5:1070, ANO9:1097, ATP8A1:1202, ATP8A2:1219, ATP11A:1310, TRPM7:1370, ANO5:1388, ATP6AP1:…	0.00714111	0.0344545	0.12924	0.311348
REACTOME_SIGNALING_BY_BMP	0.121064	20	SMAD7:218, BMPR1A:294, SMAD9:347, ACVR2B:741, ACVRL1:947, FSTL1:1274, GDF2:2782, CER1:4656, GREM2:4717, BMPR1B:4733, SKI:5261, SMAD6:6401, SMURF2:6504, AMHR2:7352, BMPR2:7396, AMH:8481, BMP2:9033, CHRDL1:11807, BMP10:12401, SMURF1:12772	0.0610514	0.124127	0.1296	0.311348
REACTOME_RHO_GTPASE_CYCLE	0.0317917	374	ARHGAP42:4, PEAK1:29, RHOJ:45, SOS1:68, RHOD:72, SH3RF1:139, TIAM2:190, ARHGEF12:209, SRGAP1:276, UACA:282, FERMT2:314, IQGAP1:330, UBXN11:422, SWAP70:426, PRAG1:430, SPTBN1:492, SHKBP1:566, FGD1:630, PLEKHG1:685, GFOD1:739, DNMBP:760, NCK2:788, PGRMC2:802, STK38:821, DLC1:844, AMIGO2:900, MCAM:972, DOCK7:1016, ZAP70:1045, DOCK1:1213, STBD1:1259, RHOF:1265, FAM13A:1331, PLEKHG6:1362, ARHGEF2:1373…	0.0374507	0.094113	0.12974	0.311348
REACTOME_ACTIVATION_OF_IRF3_IRF7_MEDIATED_BY_TBK1_IKK_EPSILON	-0.147702	11	PTPN11:451, LY96:678, TLR4:1187, TBK1:1580, SARM1:1931, CD14:3304, IRF3:5276, IKBKE:7324, TRAF3:8516, TANK:9025, TICAM2:13014	0.0899358	0.154799	0.13051	0.312246
REACTOME_PROCESSING_OF_INTRONLESS_PRE_MRNAS	0.138989	13	PAPOLA:585, WDR33:917, CLP1:1214, CPSF7:1576, NCBP1:3785, CSTF2:3792, FIP1L1:4644, SYMPK:4649, CPSF1:6270, PCF11:7138, CPSF2:8395, CPSF3:11509, CSTF2T:12649	0.0828308	0.148597	0.13137	0.313354
REACTOME_G_PROTEIN_MEDIATED_EVENTS	0.0900572	41	CAMKK2:305, KPNA2:740, GNA14:818, NBEA:894, PRKACA:1458, GNAT3:1557, PDE1B:1669, CAMK2B:2103, GRK2:2791, ADCY5:3130, ITPR2:3244, ITPR3:3267, PRKCA:3376, PLCB1:3536, PLCB4:3890, GNAL:4154, PRKACB:4160, CAMK2A:4284, ADCY2:4685, PRKCG:5085, PRKAR2B:5319, PDE1A:5732, CAMKK1:5801, PDE1C:5944, CAMK4:6181, ADCY1:6742, ITPR1:7081, PLCB2:7556, PRKAR2A:8028, PRKAR1A:8036, GNA15:8966, ADCY9:9621, ADCY3:9639…	0.0463193	0.102827	0.13325	0.316881
REACTOME_COPI_DEPENDENT_GOLGI_TO_ER_RETROGRADE_TRAFFIC	0.0587705	69	COPZ2:215, KIF26B:244, NSF:311, COPB2:318, KIF3C:486, KLC3:713, COPA:761, KIF3B:886, KIF15:1098, TMED10:1137, NAPG:1145, COPZ1:1193, COPB1:1647, GBF1:1825, TUBB1:2046, ZW10:2387, KLC4:2961, KIF9:3722, KIF18A:3909, KIF3A:3974, RACGAP1:4078, KIF2B:4143, COPE:4225, KIFC2:4325, KDELR3:4491, COPG2:4540, KIF13B:4957, USE1:4964, KIF1C:5745, ARFGAP1:5775, STX18:5832, KIFC1:6117, KIF23:6251, KIF11:6266, K…	0.092196	0.156123	0.13437	0.318412
REACTOME_SUMOYLATION_OF_INTRACELLULAR_RECEPTORS	-0.0840074	24	RXRA:133, NR1I2:141, VDR:342, NR1H4:355, PPARG:902, PIAS2:1086, NR3C2:1558, RARA:2828, HDAC4:3237, PGR:3537, PIAS4:5115, RORA:5454, ESR1:5716, NR1H2:6172, PPARA:6420, NR5A2:8179, NR1H3:8448, PIAS1:9449, NR3C1:9961, NR5A1:10064, THRA:10465, THRB:11333, PIAS3:11377, NR2C1:13323	0.154594	0.196755	0.13529	0.318412
REACTOME_NITRIC_OXIDE_STIMULATES_GUANYLATE_CYCLASE	0.0929058	20	PDE11A:183, KCNMB3:1321, PDE1B:1669, PDE2A:2060, GUCY1A1:2097, KCNMB2:2177, KCNMA1:2547, PRKG2:3237, PDE9A:4867, PDE1A:5732, NOS3:6729, ITPR1:7081, GUCY1A2:7101, IRAG1:7323, NOS2:8619, PDE10A:9252, GUCY1B1:10651, KCNMB1:10746, PDE5A:10923, NOS1:11904	0.150588	0.194264	0.13563	0.318412
REACTOME_ASSEMBLY_OF_ACTIVE_LPL_AND_LIPC_LIPASE_COMPLEXES	-0.11916	18	LPL:136, ANGPTL3:388, ANGPTL8:400, CIDEC:730, APOA5:2801, LIPC:3908, CREB3L3:4201, APOC2:4328, ANGPTL4:5243, MBTPS2:5265, APOA4:6232, MBTPS1:6591, LMF1:6623, LMF2:6849, PCSK5:7330, FGF21:10112, PCSK6:10287, FURIN:11067	0.0802434	0.146982	0.13584	0.318412
REACTOME_HOST_INTERACTIONS_OF_HIV_FACTORS	0.0595433	81	NUP153:494, NUP54:598, AP2M1:647, NUP155:669, PSIP1:676, PSMF1:738, PSMD1:1008, NUP58:1124, CD28:1251, ATP6V1H:1263, PSMD13:1267, SEC13:2080, PAK2:2085, NUP160:2244, PSMD4:2289, LCK:2414, NUP88:2429, PSMD9:2633, CCNT1:2790, AP1M2:3090, NUP210:3152, RAE1:3535, AP1G1:3555, NUP37:3561, NUP50:3627, PSMA8:3829, NUP214:3850, PSMB4:3880, NUP188:3885, PSMD2:3993, TPR:4025, NPM1:4308, PSMD3:4343, PSMB11:4…	0.0647295	0.129923	0.13591	0.318412
REACTOME_SENSORY_PERCEPTION_OF_TASTE	-0.104321	30	TAS1R1:47, TAS2R7:101, TAS2R1:132, SCNN1B:277, TAS2R10:338, TAS2R3:412, TAS1R2:819, SCNN1G:954, TAS1R3:1487, TRPM4:2640, SCN1B:2789, TAS2R38:3579, SCNN1A:3826, SCN3A:4569, OTOP1:4787, TAS2R41:5083, TRPM5:5486, SCN4B:5562, TAS2R4:6166, PLCB2:6357, GRM1:6442, SCN2A:7464, SCN9A:8740, GNB3:10275, ITPR3:10646, SCN2B:11633, GNAT3:12356, GRM4:12462, CALHM3:12661, CALHM1:13205	0.0481962	0.104772	0.13741	0.320973
REACTOME_NS1_MEDIATED_EFFECTS_ON_HOST_PATHWAYS	0.104058	32	NUP153:494, NUP54:598, NUP155:669, KPNA2:740, NUP58:1124, EIF2AK2:1473, SEC13:2080, NUP160:2244, NUP88:2429, NUP210:3152, RAE1:3535, NUP37:3561, NUP50:3627, NUP214:3850, NUP188:3885, KPNA5:4017, TPR:4025, NUP107:4564, KPNA7:4787, NUP205:6327, NUP35:7250, NUP93:7660, NUP43:9054, NUP98:10115, NUP85:10134, SEH1L:10184, AAAS:10347, ISG15:10564, NUP133:10805, NUP62:12156, NUP42:12387, NDC1:12918	0.0418489	0.0986841	0.13857	0.322572
REACTOME_DEFECTIVE_INTRINSIC_PATHWAY_FOR_APOPTOSIS	0.0985791	21	JUN:289, FASLG:901, CDC25A:1217, FOXO3:1729, CAPNS1:1949, PRDX1:2372, CDKN2A:2404, LMNA:2496, CAST:3907, CAPN1:4548, C1QBP:4576, CDC25B:4623, LMNB1:6111, APP:6689, SOD2:8482, TP53:9520, BCL2L11:10021, CDC25C:10240, CAPN2:11466, CAPNS2:13222, PRDX2:13366	0.118098	0.17638	0.13925	0.322572
REACTOME_REGULATION_OF_GENE_EXPRESSION_IN_BETA_CELLS	0.0992297	19	HNF4A:208, FOXO1:283, RFX6:315, PAX6:482, HNF1A:1204, AKT1:1545, GCK:1879, HNF4G:2953, PDX1:3813, FOXA3:3874, FOXA2:5478, NEUROD1:6630, NKX2-2:7052, AKT2:10830, PKLR:11406, MAFA:11425, INS:12756, NKX6-1:12802, SLC2A2:13325	0.134519	0.183559	0.13932	0.322572
REACTOME_GLUCAGON_LIKE_PEPTIDE_1_GLP1_REGULATES_INSULIN_SECRETION	0.0941152	22	IQGAP1:330, KCNC2:491, PRKACA:1458, GCG:1711, KCNS3:2999, ADCY5:3130, ITPR2:3244, ITPR3:3267, GNB3:3638, PRKACB:4160, PRKAR2B:5319, KCNB1:6067, RAPGEF3:6608, ITPR1:7081, RAPGEF4:7534, PRKAR2A:8028, PRKAR1A:8036, ADCY8:10125, ADCY6:10339, PRKAR1B:10388, GNB5:10582, GLP1R:13046	0.126747	0.178139	0.14125	0.325106
REACTOME_RUNX1_INTERACTS_WITH_CO_FACTORS_WHOSE_PRECISE_EFFECT_ON_RUNX1_TARGETS_IS_NOT_KNOWN	0.10005	21	PHC1:62, ARID2:171, PHC3:317, EP300:887, PHC2:1339, CBX2:2343, SMARCA4:2621, SMARCA2:2979, SCMH1:3445, SMARCD2:4720, CBX8:5126, SMARCC2:5216, SMARCC1:5360, ARID1A:6849, AUTS2:8182, RING1:8473, HIPK2:10176, PBRM1:11623, CBX6:13159, SMARCE1:13189, RUNX1:13294	0.112712	0.173131	0.14148	0.325106
REACTOME_VESICLE_MEDIATED_TRANSPORT	0.028605	515	TBC1D20:12, UBAP1:34, TSG101:59, GJB7:83, PPP6C:127, COG6:143, GNS:155, BIN1:157, SNX5:181, EXOC5:213, COPZ2:215, BET1L:239, KIF26B:244, NSF:311, COPB2:318, USO1:356, VPS45:375, SYT9:389, GJA10:392, GALNT1:401, BLOC1S1:411, GJB2:421, HSPH1:424, SYT1:462, M6PR:480, KIF3C:486, SPTBN1:492, NAA35:513, AAK1:527, RIN2:575, GDI1:581, AP2M1:647, LNPEP:687, KLC3:713, CLVS1:723, SCARB2:730, COPA:761, DVL2:…	0.0294635	0.0808311	0.14165	0.325106
KEGG_ERBB_SIGNALING_PATHWAY	0.0531464	70	SOS1:68, JUN:289, STAT5A:471, NCK2:788, RPS6KB2:1201, AKT1:1545, PAK2:2085, CAMK2B:2103, GAB1:2432, MAPK9:2446, CBL:2732, ERBB3:2824, MAP2K7:3060, EGF:3209, MAPK3:3331, NRG1:3359, PRKCA:3376, PIK3CG:3585, SHC1:3918, ERBB4:4029, TGFA:4214, PIK3R5:4215, CAMK2A:4284, SHC3:4286, EIF4EBP1:4438, BTC:5061, PRKCG:5085, EGFR:5182, MTOR:5297, MYC:5500, MAPK10:5583, ERBB2:5718, BRAF:5861, ABL2:5867, SOS2:59…	0.125108	0.177024	0.14242	0.325897
KEGG_BIOSYNTHESIS_OF_UNSATURATED_FATTY_ACIDS	-0.143903	18	HACD2:104, FADS2:408, ACAA1:551, ELOVL6:562, SCD:1205, ACOX1:1335, HADHA:1780, PECR:2371, ACOT7:3267, HSD17B12:3904, TECR:4735, ACOX3:6496, FADS1:6658, ELOVL5:7251, ELOVL2:8432, SCD5:11804, YOD1:12504, HACD1:13409	0.0346441	0.0917179	0.14282	0.325897
REACTOME_TRANSCRIPTION_OF_THE_HIV_GENOME	0.089626	45	GTF2F1:173, TAF4B:255, CCNT2:343, NELFE:644, GTF2A1:798, TAF10:1062, POLR2F:1548, CDK7:1703, TAF2:1820, TAF11:1938, GTF2E1:2015, ERCC3:2188, GTF2H4:2265, TCEA1:2514, GTF2E2:2537, CCNT1:2790, TAF3:3080, SUPT5H:3595, TAF9:3730, NCBP1:3785, TAF7:3911, NELFB:3978, NELFCD:4291, TBP:4653, GTF2H1:5409, ELL:5778, RNMT:6034, ELOA:6303, CTDP1:6581, SUPT16H:7406, TAF9B:8434, SSRP1:8439, TAF6:8922, MNAT1:100…	0.0378105	0.0946385	0.1433	0.32605
REACTOME_NUCLEOTIDE_BIOSYNTHESIS	-0.152491	13	ADSS2:373, GMPS:907, IMPDH2:1449, ADSL:1610, UMPS:2685, PPAT:2822, CAD:3025, PFAS:3381, ADSS1:4673, IMPDH1:5878, PAICS:7515, DHODH:13094, ATIC:13703	0.0570409	0.11827	0.14374	0.326111
REACTOME_RHO_GTPASE_EFFECTORS	0.0478594	177	RHOD:72, FLNA:307, IQGAP1:330, CENPH:386, DLG4:409, NCKIPSD:547, KLC3:713, DVL2:773, LIMK2:981, BTK:1380, KDM4C:1498, CIT:1504, DAAM1:1520, WASF1:1633, RHOC:1638, CENPS:1756, TUBB1:2046, PPP2R1B:2051, PRC1:2077, SEC13:2080, PAK2:2085, MAD2L1:2144, NCF2:2192, PPP2R5B:2220, NUP160:2244, B9D2:2249, MYH14:2277, ZW10:2387, CENPL:2413, ROCK1:2463, CENPU:2631, ZWINT:2721, KDM1A:2751, PPP2R5D:2802, NDC80…	0.0291276	0.0808311	0.14473	0.327254
REACTOME_SHC1_EVENTS_IN_ERBB2_SIGNALING	0.102076	17	SOS1:68, ERBB3:2824, EGF:3209, NRG1:3359, PRKCA:3376, SHC1:3918, ERBB4:4029, BTC:5061, EGFR:5182, PTPN12:5199, PRKCE:5652, ERBB2:5718, EREG:6088, NRG2:7642, NRG3:7863, PRKCD:13584, HBEGF:13854	0.145297	0.190967	0.14518	0.327254
REACTOME_ACTIVATED_TAK1_MEDIATES_P38_MAPK_ACTIVATION	0.108131	17	TRAF6:240, MAPKAPK3:648, TAB3:1772, MAPKAPK2:3274, TAB1:3932, NOD2:4173, NOD1:5783, MAP2K6:5913, MAP2K3:5940, UBE2V1:6274, UBE2N:6430, RIPK2:7017, MAPK11:7054, IRAK2:7393, TAB2:9060, IRAK1:9584, MAP3K7:10954	0.122894	0.17638	0.146	0.327254
REACTOME_PROCESSING_OF_CAPPED_INTRONLESS_PRE_MRNA	0.12121	16	PAPOLA:585, WDR33:917, CLP1:1214, CPSF7:1576, LSM10:2856, NCBP1:3785, CSTF2:3792, SLBP:3992, FIP1L1:4644, SYMPK:4649, CPSF1:6270, PCF11:7138, CPSF2:8395, CPSF3:11509, LSM11:12623, CSTF2T:12649	0.0933855	0.157289	0.14622	0.327254
REACTOME_COPI_MEDIATED_ANTEROGRADE_TRANSPORT	0.0605473	65	COG6:143, COPZ2:215, BET1L:239, NSF:311, COPB2:318, USO1:356, SPTBN1:492, COPA:761, CAPZA1:918, TMED10:1137, NAPG:1145, COPZ1:1193, COPB1:1647, GBF1:1825, TUBB1:2046, DCTN3:2160, BET1:2680, ANK2:2772, GOSR2:2864, DCTN6:3094, YKT6:3124, ANK3:3201, SPTBN5:3669, COG8:3676, CAPZB:3899, SPTBN4:4011, COPE:4225, COG3:4371, KDELR3:4491, COPG2:4540, DCTN4:5320, GOLGB1:5727, ARFGAP1:5775, SPTBN2:5807, STX5…	0.0921405	0.156123	0.14643	0.327254
REACTOME_ATTENUATION_PHASE	0.115499	16	CRYBA4:176, HSPB2:292, HSPH1:424, HSPB1:559, EP300:887, SERPINH1:1330, COL4A6:3103, TNFRSF21:4056, HSF1:6646, HSPA1L:8055, DEDD2:8659, FKBP4:9478, CREBBP:9993, MRPL18:10209, HSP90AA1:11805, DNAJB1:11847	0.109877	0.170444	0.147	0.327254
REACTOME_NEF_MEDIATES_DOWN_MODULATION_OF_CELL_SURFACE_RECEPTORS_BY_RECRUITING_THEM_TO_CLATHRIN_ADAPTERS	0.107412	15	AP2M1:647, CD28:1251, ATP6V1H:1263, LCK:2414, AP1M2:3090, AP1G1:3555, PACS1:4648, CD4:5080, AP1S2:6325, AP2A2:6374, CD8B:6870, AP1B1:7022, AP1S3:10585, B2M:11836, AP2A1:13114	0.149957	0.193847	0.14771	0.327254
REACTOME_TGF_BETA_RECEPTOR_SIGNALING_ACTIVATES_SMADS	0.105415	17	SMAD7:218, PPP1CA:1332, PMEPA1:2166, TGFBR2:2415, CBL:2732, FURIN:2846, NEDD4L:3514, TGFB1:4293, USP15:5682, TGFBR1:6261, SMURF2:6504, BAMBI:6597, STRAP:7098, STUB1:8489, ZFYVE9:10659, MTMR4:12319, SMURF1:12772	0.132586	0.182904	0.14786	0.327254
REACTOME_ANTIGEN_PRESENTATION_FOLDING_ASSEMBLY_AND_PEPTIDE_LOADING_OF_CLASS_I_MHC	0.102306	16	BCAP31:1460, SEC31A:1766, CALR:1822, SEC13:2080, SEC24A:3272, ERAP1:3342, TAP1:4010, TAPBP:4396, TAP2:5854, SEC24B:5862, PDIA3:6490, SEC24D:8099, CANX:8248, SEC24C:9325, B2M:11836, HSPA5:13106	0.156738	0.197404	0.14867	0.327254
REACTOME_SIGNALING_BY_KIT_IN_DISEASE	0.104265	13	SOS1:68, STAT5A:471, STAT1:977, KIT:982, LCK:2414, LYN:4625, STAT5B:6114, SRC:6424, JAK2:7897, PIK3R1:8583, PIK3R2:10257, PIK3R3:10608, YES1:13713	0.193203	0.224225	0.14869	0.327254
REACTOME_ENERGY_DEPENDENT_REGULATION_OF_MTOR_BY_LKB1_AMPK	0.0945802	18	RPTOR:865, CAB39L:1509, RRAGD:1605, STRADB:2014, TSC1:2059, STRADA:3035, PRKAA2:3846, SLC38A9:3996, MTOR:5297, PRKAA1:5551, PRKAG2:5912, TSC2:6422, STK11:7644, PPM1A:9421, LAMTOR2:10396, PRKAG1:10603, PRKAB1:11903, PRKAB2:12163	0.165004	0.203261	0.14907	0.327254
REACTOME_HEDGEHOG_ON_STATE	0.0557049	59	ULK3:113, PSMF1:738, SUFU:815, PSMD1:1008, BOC:1234, PSMD13:1267, PTCH1:1454, EVC:1556, GLI2:1666, PSMD4:2289, CDON:2474, ARRB2:2566, PSMD9:2633, KIF7:2659, GRK2:2791, PSMA8:3829, PSMB4:3880, KIF3A:3974, PSMD2:3993, DHH:4206, PSMD3:4343, PSMB11:4403, PSMB9:4409, EVC2:5024, PSMB10:5084, GPR161:5240, PSMB2:5295, GLI3:5334, DZIP1:5346, PSMD8:5898, SMURF2:6504, ITCH:6516, HHIP:6521, IHH:6548, ARRB1:7…	0.139727	0.186702	0.15043	0.327254
REACTOME_PROTEIN_METHYLATION	0.109192	11	KIN:627, VCPKMT:1173, ETFBKMT:1511, CAMKMT:3185, EEF1AKMT2:4604, METTL22:5108, METTL21A:7213, EEF2KMT:8347, PRMT3:8810, EEF1AKMT1:8855, ETFB:11969	0.209983	0.232664	0.1505	0.327254
REACTOME_THE_PHOTOTRANSDUCTION_CASCADE	0.138426	24	RHO:129, RGS9BP:779, RCVRN:1078, SAG:1445, CNGA1:1573, GUCA1B:2627, FNTA:2635, METAP2:2896, CAMKMT:3185, PRKCA:3376, PDE6B:3640, RGS9:3718, NMT1:4112, PDE6A:4789, GUCY2D:5065, FNTB:6916, GRK4:7132, GUCA1A:7446, METAP1:8030, GRK1:9830, NMT2:10160, PPEF1:10168, GNB5:10582, PRKCQ:12849	0.0189963	0.0631447	0.15066	0.327254
REACTOME_RAC2_GTPASE_CYCLE	0.0510523	74	ARHGAP42:4, IQGAP1:330, SWAP70:426, PGRMC2:802, MCAM:972, DOCK1:1213, STBD1:1259, EPHA2:1432, VRK2:1541, ARHGAP21:1837, VANGL1:1989, ARHGAP32:2004, PAK2:2085, NCF2:2192, ANKLE2:2418, DEF6:2704, LEMD3:2794, OPHN1:2990, CDC42EP4:3096, DOCK3:3102, ABI2:3391, NHS:3422, DOCK4:3615, RACGAP1:4078, SYDE1:4305, NCF1:4521, SLITRK5:4610, VAV1:4613, TIAM1:4647, WASF2:4728, ESYT1:4808, ERBIN:5093, DSG2:5416, …	0.129927	0.180989	0.15089	0.327254
REACTOME_SYNTHESIS_OF_PA	-0.0894281	34	PLA2G1B:207, PLA2G4D:212, GPAT3:247, PLA2G12A:253, GPAT4:534, PLD2:992, GPD1L:1207, AGPAT2:1274, PLA2G2D:1623, GPAM:1941, PLA2G4A:2565, LPCAT1:2596, AGPAT5:3169, PLA2R1:3792, PLA2G2E:3918, AGPAT3:3998, GPAT2:4366, DDHD1:4496, GNPAT:4632, LIPH:6249, GPD1:6545, MIGA2:6952, PLA2G5:7329, DDHD2:8959, PLA2G2F:9021, GPD2:9171, LCLAT1:9250, PLD1:9826, AGPAT1:10389, AGPAT4:11733, MIGA1:12290, ACP6:13034, …	0.0714634	0.138999	0.15096	0.327254
KEGG_GLUTATHIONE_METABOLISM	-0.0822247	34	MGST3:130, GSTO1:347, GGT1:639, GSTZ1:667, MGST2:1133, ANPEP:1143, MGST1:1315, GCLC:1496, GSTK1:1630, SRM:2057, GPX3:2226, GPX1:2383, GGCT:2518, RRM2B:2714, GSR:3635, ODC1:4019, RRM1:4348, GPX2:4887, LAP3:5407, GSS:6778, OPLAH:7814, GGT6:7830, GSTA4:8265, GGT5:8913, PGD:9100, TXNDC12:9114, IDH1:9532, G6PD:10018, GSTO2:11125, GCLM:11156, SMS:11416, IDH2:12301, GPX7:13270, GGT7:13484	0.0974529	0.161542	0.15129	0.327254
REACTOME_PHOSPHOLIPASE_C_MEDIATED_CASCADE_FGFR4	0.125792	10	KLB:629, FGF6:1648, FGF1:1663, FGF19:4437, FGFR4:5100, PLCG1:6351, FGF23:7193, FGF17:7610, FGF20:8252, FGF4:10685	0.168492	0.204824	0.15461	0.333522
REACTOME_SIGNALING_BY_NTRKS	0.0683823	95	NAB1:21, SOS1:68, LYL1:319, ID1:377, MAPK13:512, NTF4:608, AP2M1:647, MAPKAPK3:648, PTPRO:680, FOSB:768, EP300:887, MEF2A:892, MEF2D:913, DUSP7:993, RPS6KA5:1493, RPS6KA2:1508, NGF:1980, PPP2R1B:2051, ATF1:2221, GAB1:2432, PPP2R5D:2802, FURIN:2846, NTRK3:2867, DOCK3:3102, IRS1:3116, MAPKAPK2:3274, JUNB:3294, MAPK3:3331, PCSK6:3626, BDNF:3647, RRAD:3703, FRS3:3736, ADCYAP1:3764, DUSP4:3802, SHC1:3…	0.0217117	0.0675262	0.1559	0.335118
REACTOME_RETROGRADE_TRANSPORT_AT_THE_TRANS_GOLGI_NETWORK	0.0506326	41	COG6:143, NSF:311, M6PR:480, NAA35:513, NAPG:1145, NAA30:1194, RIC1:1787, RGP1:2298, VTI1A:2389, ARL1:2615, VPS51:3299, COG8:3676, COG3:4371, ARFRP1:4825, GOLGA1:5573, GCC2:6129, STX6:6215, TMF1:6604, STX10:6777, NAPA:7112, STX16:7118, VPS54:7262, RABEPK:7633, RAB43:7702, VAMP3:7707, VPS53:8231, COG4:8261, COG2:8529, GCC1:8910, COG1:9023, NAA38:9053, ARFIP2:9294, USP6NL:9572, GOLGA4:9900, PLIN3:1…	0.262619	0.259786	0.15672	0.335118
REACTOME_HDMS_DEMETHYLATE_HISTONES	0.117279	19	JMJD6:667, KDM1B:1487, KDM4C:1498, RIOX2:2217, KDM1A:2751, ARID5B:3290, PHF8:3988, KDM5B:4142, PHF2:4408, KDM6B:4805, KDM5C:5511, KDM3B:5619, KDM5A:5698, KDM2A:5809, KDM2B:7623, KDM7A:8677, KDM4A:11682, KDM3A:11876, KDM4B:12306	0.0769398	0.143601	0.1575	0.335118
REACTOME_DEFECTIVE_CFTR_CAUSES_CYSTIC_FIBROSIS	0.0675065	35	PSMF1:738, PSMD1:1008, DERL1:1199, PSMD13:1267, RNF5:2107, PSMD4:2289, PSMD9:2633, PSMA8:3829, PSMB4:3880, ERLEC1:3896, CFTR:3991, PSMD2:3993, PSMD3:4343, ERLIN1:4352, PSMB11:4403, PSMB9:4409, OS9:4704, PSMB10:5084, PSMB2:5295, PSMD8:5898, ERLIN2:6837, PSMD12:7927, PSME2:8228, SEL1L:8474, PSMD6:8496, PSMB7:8709, PSMB8:9272, PSMB6:9847, PSMB5:9913, PSME4:10453, PSME1:10594, PSMD5:10989, PSME3:1119…	0.167448	0.204824	0.15842	0.335118
KEGG_RIBOSOME	-0.0964386	14	RPL3L:107, RPLP2:919, RPL32:1125, MRPL13:1936, RSL24D1:2350, RPL3:2375, RPL4:3847, RPL7:4543, RPL10L:5460, RPS3:6494, RPL14:9584, RPS27L:10557, RPL36A:13647, RPL9:13686	0.21172	0.233476	0.15848	0.335118
REACTOME_METABOLISM_OF_PORPHYRINS	-0.104137	22	FABP1:41, HMOX2:169, ABCC1:310, UGT1A1:376, ALB:567, SLCO1B1:1746, HMOX1:1873, COX10:3190, BLVRA:3570, SLCO2B1:3772, FLVCR1:4338, PPOX:4385, CPOX:4578, ALAS1:5725, UROS:7583, BLVRB:7809, COX15:10031, FECH:10137, UROD:10534, ALAD:10863, ALAS2:13342, HMBS:13403	0.0910923	0.155512	0.15876	0.335118
KEGG_ADHERENS_JUNCTION	0.0635009	55	PTPN6:228, NECTIN1:251, IQGAP1:330, ACTN3:452, EP300:887, FER:1190, WASF1:1633, TJP1:2036, NECTIN4:2041, INSR:2062, TCF7L1:2264, TGFBR2:2415, VCL:2993, PTPRF:3089, FGFR1:3154, MAPK3:3331, ACTN2:3581, SSX2IP:4671, WASF2:4728, MET:4975, WASF3:5029, EGFR:5182, CTNND1:5571, ERBB2:5718, CDH1:6137, TGFBR1:6261, CTNNA1:6385, SRC:6424, LEF1:6554, PTPRM:6628, BAIAP2:6660, ACP1:6725, TCF7:6810, PTPRJ:7166,…	0.103988	0.167173	0.15896	0.335118
REACTOME_ANTIGEN_ACTIVATES_B_CELL_RECEPTOR_BCR_LEADING_TO_GENERATION_OF_SECOND_MESSENGERS	0.0766423	26	SOS1:68, PTPN6:228, BLK:1096, BTK:1380, TRPC1:2079, PIK3AP1:2154, ITPR2:3244, ITPR3:3267, SH3KBP1:3789, ORAI1:3797, VAV1:4613, LYN:4625, ORAI2:5352, BLNK:5797, ITPR1:7081, CD79B:7421, PIK3CD:7669, PLCG2:7727, NCK1:7981, PIK3R1:8583, DAPP1:8869, STIM1:10328, SYK:12180, CD19:12230, CD22:12759, CD79A:12787	0.176518	0.21043	0.15909	0.335118
KEGG_ALPHA_LINOLENIC_ACID_METABOLISM	-0.129591	15	PLA2G1B:207, PLA2G12A:253, FADS2:408, ACOX1:1335, PLA2G2D:1623, PLA2G4A:2565, PLA2G4E:3480, PLA2G2E:3918, PLA2G3:5401, ACOX3:6496, PLA2G5:7329, PLA2G2F:9021, PLA2G12B:9217, PLA2G6:11928, PLA2G2C:11999	0.0823947	0.148321	0.15917	0.335118
REACTOME_PLASMA_LIPOPROTEIN_REMODELING	-0.107892	30	LPL:136, ABCG1:244, ANGPTL3:388, ANGPTL8:400, ALB:567, CIDEC:730, APOB:812, MTTP:1074, APOE:2092, LIPG:2664, APOA5:2801, LIPC:3908, CREB3L3:4201, APOC2:4328, ANGPTL4:5243, MBTPS2:5265, APOA4:6232, MBTPS1:6591, LMF1:6623, LMF2:6849, PCSK5:7330, PLTP:8030, APOF:8901, P4HB:9223, FGF21:10112, PCSK6:10287, LCAT:10293, APOA1:11032, FURIN:11067, APOA2:11744	0.0410271	0.0985538	0.15997	0.335434
REACTOME_SIALIC_ACID_METABOLISM	-0.0749239	30	ST6GAL1:216, ST3GAL6:934, CMAS:1339, GLB1:1560, NANS:1738, NEU4:1761, ST6GALNAC6:1964, CTSA:3221, NEU1:3295, SLC17A5:3589, ST6GALNAC4:3846, ST3GAL5:3994, ST6GAL2:4044, SLC35A1:4463, NEU3:4574, ST3GAL4:5225, NPL:5698, ST8SIA3:5997, ST8SIA2:6174, ST6GALNAC3:6741, ST8SIA1:6852, NEU2:6913, ST3GAL3:8355, ST6GALNAC2:9460, ST3GAL1:10196, ST6GALNAC5:10910, ST8SIA5:11920, GNE:11994, NANP:12737, ST3GAL2:13…	0.155926	0.197404	0.16017	0.335434
KEGG_NICOTINATE_AND_NICOTINAMIDE_METABOLISM	-0.102863	20	CD38:119, NAMPT:498, AOX1:717, ENPP1:742, ENPP3:1465, NUDT12:2007, NT5E:2484, NMRK1:2600, NT5C3A:3081, NMNAT3:4440, PNP:5637, NADSYN1:5742, NT5C:6632, NMNAT2:7255, QPRT:9774, NNT:9905, NT5C1A:10637, NMNAT1:10738, NADK:11546, NNMT:11601	0.111493	0.171678	0.16119	0.336075
REACTOME_TOLL_LIKE_RECEPTOR_CASCADES	0.0451554	113	CTSK:74, AGER:206, TRAF6:240, JUN:289, RIPK1:369, MAPKAPK3:648, MEF2A:892, TICAM2:899, CHUK:925, DUSP7:993, BTK:1380, EEA1:1489, RPS6KA5:1493, RPS6KA2:1508, TAB3:1772, S100A12:1922, PPP2R1B:2051, ATF1:2221, PTPN4:2250, MAPK9:2446, BIRC3:2485, NFKBIB:2660, IRAK4:2798, PPP2R5D:2802, MAP2K7:3060, SOCS1:3186, GSDMD:3230, MAPKAPK2:3274, MAPK3:3331, DUSP4:3802, TAB1:3932, VRK3:4155, CTSS:4156, NOD2:417…	0.0986848	0.162878	0.16154	0.336075
KEGG_GNRH_SIGNALING_PATHWAY	0.0542929	75	SOS1:68, JUN:289, MMP2:303, CALML3:439, MAPK13:512, MMP14:1266, PRKACA:1458, CACNA1F:1469, PLA2G2C:1914, PLA2G6:1985, CAMK2B:2103, MAPK9:2446, PTK2B:2569, MAP2K7:3060, MAP3K3:3068, ADCY5:3130, ITPR2:3244, ITPR3:3267, MAPK3:3331, PRKCA:3376, CGA:3490, GNRH1:3492, PLCB1:3536, PLCB4:3890, CACNA1C:4041, PLD1:4087, PRKACB:4160, CAMK2A:4284, ADCY2:4685, PLA2G12B:4696, CALML5:4849, PLA2G2F:4892, CACNA1D…	0.104961	0.167756	0.16193	0.336075
REACTOME_RUNX2_REGULATES_OSTEOBLAST_DIFFERENTIATION	0.104966	18	WWTR1:640, HEY2:1133, SATB2:1415, YAP1:1750, COL1A1:3242, MAPK3:3331, UCMA:3894, RB1:3919, RUNX2:3979, GLI3:5334, BGLAP:5411, SRC:6424, ZNF521:6612, SP7:8640, HEY1:8867, HDAC6:11361, ABL1:11832, YES1:13713	0.123341	0.17638	0.1629	0.336075
REACTOME_GAP_JUNCTION_TRAFFICKING_AND_REGULATION	0.0850468	26	GJB7:83, GJA10:392, GJB2:421, AP2M1:647, GJA8:944, GJA4:1207, TJP1:2036, TUBB1:2046, GJB4:3346, GJC1:4195, GJD4:4814, GJD2:4927, GJA1:5502, GJB5:5623, DNM1:5719, SRC:6424, CLTB:6540, GJA3:6973, DNM2:8105, TUBAL3:9124, MYO6:10354, GJB3:12068, GJB6:12632, GJA5:12688, CLTA:13218, DAB2:13514	0.133675	0.182965	0.16293	0.336075
REACTOME_INFECTION_WITH_MYCOBACTERIUM_TUBERCULOSIS	0.0812371	16	PGK1:150, DUSP16:470, ATP6V1H:1263, TRIM27:2118, MAPK3:3331, MRC1:3353, ENO1:3893, RNF213:5028, VPS33B:5180, SFPQ:8038, HGS:8280, NOS2:8619, GSK3A:9897, CORO1A:10678, B2M:11836, TLR2:13334	0.260804	0.258772	0.16303	0.336075
KEGG_ACUTE_MYELOID_LEUKEMIA	0.0691409	45	SOS1:68, CCND1:313, STAT5A:471, CHUK:925, KIT:982, RPS6KB2:1201, AKT1:1545, TCF7L1:2264, JUP:2860, ZBTB16:3231, MAPK3:3331, PIM1:3340, PIK3CG:3585, CCNA1:4062, PIK3R5:4215, EIF4EBP1:4438, PIM2:4595, FLT3:5116, MTOR:5297, NFKB1:5375, MYC:5500, BRAF:5861, SOS2:5992, STAT5B:6114, IKBKB:6478, LEF1:6554, PIK3CB:6664, TCF7:6810, PML:6880, RUNX1T1:7324, PIK3CD:7669, RAF1:8339, MAP2K2:8447, PIK3R1:8583, …	0.109111	0.170297	0.16366	0.336495
KEGG_PHOSPHATIDYLINOSITOL_SIGNALING_SYSTEM	-0.0439738	68	PI4KA:530, PIP5K1B:641, PLCD4:734, INPP5K:926, PLCB3:1118, CDS1:1283, INPP5E:1675, INPP5J:1852, INPPL1:1918, INPP5D:2052, PIK3C2B:2212, DGKQ:2336, INPP4A:2609, DGKE:2614, CDIPT:2698, INPP5A:2704, OCRL:2757, DGKA:2831, PLCE1:2879, PIK3R3:3305, DGKD:3465, ITPK1:3621, PIK3R2:3656, ITPKA:4103, DGKH:4289, PLCD1:4336, DGKG:4389, INPP5B:4951, PIK3R1:5330, PI4KB:5764, IMPA2:6178, PLCG2:6186, PIK3CD:6244,…	0.21098	0.233358	0.16573	0.339866
KEGG_NEUROTROPHIN_SIGNALING_PATHWAY	0.0463846	91	SOS1:68, TRAF6:240, JUN:289, CALML3:439, MAPK13:512, NTF4:608, FASLG:901, PRDM4:1459, RPS6KA5:1493, RPS6KA2:1508, ARHGDIB:1526, AKT1:1545, FOXO3:1729, NGF:1980, CAMK2B:2103, GAB1:2432, MAPK9:2446, NFKBIB:2660, IRAK4:2798, NTRK3:2867, CSK:2891, MAP2K7:3060, MAP3K3:3068, IRS1:3116, MAPKAPK2:3274, MAPK3:3331, PIK3CG:3585, BDNF:3647, TP73:3826, SHC1:3918, PIK3R5:4215, RPS6KA6:4250, CAMK2A:4284, SHC3:…	0.127453	0.178409	0.16724	0.340836
REACTOME_DEFECTS_IN_COBALAMIN_B12_METABOLISM	-0.124346	13	CBLIF:239, ABCD4:299, MTR:1005, MMUT:1804, MTRR:2041, AMN:2873, MMAA:3258, TCN2:5186, CUBN:5908, MMAB:6769, LMBRD1:11405, MMACHC:12434, MMADHC:13004	0.120719	0.17638	0.16733	0.340836
REACTOME_INTRAFLAGELLAR_TRANSPORT	0.147129	30	IFT74:378, IFT172:390, KIF3C:486, KIF3B:886, DYNC2LI1:1043, IFT46:1957, TUBB1:2046, WDR35:2424, TTC26:2507, IFT20:2759, DYNC2H1:2920, TTC21B:3036, IFT57:3178, KIF17:3673, KIF3A:3974, IFT27:4247, TRIP11:4852, IFT43:5264, WDR19:5615, CLUAP1:6210, IFT52:6734, IFT140:6941, IFT80:7373, TRAF3IP1:7802, HSPB11:8777, IFT88:9661, IFT22:10782, KIFAP3:11019, IFT81:11677, IFT122:12928	0.00533088	0.0281503	0.16751	0.340836
REACTOME_AQUAPORIN_MEDIATED_TRANSPORT	-0.0806412	31	AQP8:76, AQP9:122, AQP5:1099, AVPR2:1629, ADCY7:2759, GNB5:3331, ADCY4:3346, PRKAR1B:3525, ADCY6:3574, ADCY8:3788, AQP6:4096, AQP1:4120, ADCY3:4274, ADCY9:4292, AQP7:5171, AQP2:5193, PRKAR1A:5877, PRKAR2A:5885, MIP:6011, RAB11FIP2:6701, ADCY1:7171, AQP4:7211, AQP11:7711, AQP3:8528, PRKAR2B:8594, ADCY2:9228, MYO5B:9263, PRKACB:9753, GNB3:10275, ADCY5:10783, PRKACA:12455	0.120583	0.17638	0.16793	0.340836
REACTOME_DAG_AND_IP3_SIGNALING	0.0936477	34	CAMKK2:305, KPNA2:740, NBEA:894, PRKACA:1458, PDE1B:1669, CAMK2B:2103, GRK2:2791, ADCY5:3130, ITPR2:3244, ITPR3:3267, PRKCA:3376, PRKACB:4160, CAMK2A:4284, ADCY2:4685, PRKCG:5085, PRKAR2B:5319, PRKCE:5652, PDE1A:5732, CAMKK1:5801, PDE1C:5944, CAMK4:6181, PLCG1:6351, ADCY1:6742, ITPR1:7081, PRKAR2A:8028, PRKAR1A:8036, ADCY9:9621, ADCY3:9639, ADCY8:10125, ADCY6:10339, PRKAR1B:10388, ADCY4:10567, AD…	0.0590834	0.121304	0.16874	0.341602
REACTOME_VIRAL_MESSENGER_RNA_SYNTHESIS	0.111062	29	GTF2F1:173, NUP153:494, NUP54:598, NUP155:669, NUP58:1124, POLR2F:1548, SEC13:2080, NUP160:2244, NUP88:2429, NUP210:3152, RAE1:3535, NUP37:3561, NUP50:3627, NUP214:3850, NUP188:3885, TPR:4025, NUP107:4564, NUP205:6327, NUP35:7250, NUP93:7660, NUP43:9054, NUP98:10115, NUP85:10134, SEH1L:10184, AAAS:10347, NUP133:10805, NUP62:12156, NUP42:12387, NDC1:12918	0.0386347	0.0963177	0.17042	0.343084
REACTOME_NUCLEAR_EVENTS_KINASE_AND_TRANSCRIPTION_FACTOR_ACTIVATION	0.0926772	44	NAB1:21, LYL1:319, ID1:377, FOSB:768, EP300:887, MEF2A:892, MEF2D:913, DUSP7:993, RPS6KA5:1493, RPS6KA2:1508, PPP2R1B:2051, ATF1:2221, PPP2R5D:2802, MAPKAPK2:3274, JUNB:3294, MAPK3:3331, RRAD:3703, DUSP4:3802, VRK3:4155, SH3GL3:4309, EGR1:5035, SGK1:5243, ASCL1:5939, CHD4:5958, EGR4:6468, ELK1:6665, ARC:6760, MAPK11:7054, TCF12:7791, RPS6KA1:7980, ATF2:8004, DNM2:8105, TRIB1:8626, MAPK7:8851, EGR…	0.0336918	0.0896896	0.171	0.343084
REACTOME_NICOTINATE_METABOLISM	-0.083528	25	CD38:119, NAMPT:498, SLC22A13:653, PARP9:877, PTGIS:994, SLC5A8:1269, NUDT12:2007, NT5E:2484, NMRK1:2600, PARP14:2842, NAPRT:3362, NMNAT3:4440, CYP8B1:5101, PARP8:5278, NADSYN1:5742, NADK2:6028, NMNAT2:7255, NAXE:8984, QPRT:9774, PTGS2:10710, NMNAT1:10738, NADK:11546, NNMT:11601, RNLS:12748, PARP16:13677	0.148608	0.193297	0.17116	0.343084
REACTOME_TRAFFICKING_OF_GLUR2_CONTAINING_AMPA_RECEPTORS	0.13365	14	GRIP1:153, NSF:311, AP2M1:647, GRIA1:1381, GRIA3:3365, PRKCA:3376, PRKCG:5085, TSPAN7:5428, AP2A2:6374, PICK1:6377, PRKCB:6560, GRIP2:9527, GRIA2:11534, AP2A1:13114	0.0835012	0.148623	0.17121	0.343084
REACTOME_DEATH_RECEPTOR_SIGNALLING	0.0467605	113	SOS1:68, OTUD7B:167, TIAM2:190, ARHGEF12:209, TRAF6:240, RIPK1:369, FGD1:630, FASLG:901, CHUK:925, USP4:1136, AATF:1276, SQSTM1:1286, ARHGEF2:1373, PRDM4:1459, ARHGEF40:1613, MADD:1677, TNF:1713, RASGRF2:1752, TAB3:1772, NGF:1980, XIAP:2084, SMPD3:2405, RTN4R:2433, BIRC3:2485, ADAM17:2597, KALRN:2608, PLEKHG5:2940, ARHGEF38:3180, TRAF1:3291, USP2:3447, ARHGEF10L:3503, CLIP3:3624, TAB1:3932, ARHGE…	0.087273	0.15188	0.17374	0.343747
REACTOME_AFLATOXIN_ACTIVATION_AND_DETOXIFICATION	-0.135017	11	ACY1:64, MGST3:130, GGT1:639, MGST2:1133, MGST1:1315, DPEP3:4749, DPEP1:5396, GGT6:7830, GGT5:8913, DPEP2:10832, GGT7:13484	0.121119	0.17638	0.17377	0.343747
REACTOME_ASSEMBLY_AND_CELL_SURFACE_PRESENTATION_OF_NMDA_RECEPTORS	0.0930088	21	LRRC7:247, DLG4:409, DLG3:688, APBA1:729, NBEA:894, TUBB1:2046, CAMK2B:2103, ACTN2:3581, KIF17:3673, CAMK2A:4284, GRIN2B:5186, DLG1:5494, DLG2:7100, GRIN2C:7465, GRIN1:9078, TUBAL3:9124, GRIN3B:10831, GRIN3A:11225, GRIN2A:11350, NEFL:12560, GRIN2D:13553	0.140347	0.186702	0.1738	0.343747
REACTOME_APOPTOTIC_CLEAVAGE_OF_CELLULAR_PROTEINS	0.0768625	34	SATB1:277, DBNL:670, ACIN1:1106, BCAP31:1460, TJP1:2036, APC:2213, ROCK1:2463, LMNA:2496, FNTA:2635, BMX:2729, STK26:2840, DSG3:2907, CLSPN:4054, MAPT:4356, TJP2:4973, DSG2:5416, BIRC2:5672, DSP:5853, PTK2:6060, LMNB1:6111, CDH1:6137, GAS2:7385, GSN:7890, STK24:8671, VIM:8796, CASP6:8926, DSG1:9173, SPTAN1:9804, ADD1:10665, CASP3:10913, OCLN:11302, PKP1:12750, PRKCQ:12849, PRKCD:13584	0.121322	0.17638	0.17389	0.343747
KEGG_PANCREATIC_CANCER	0.0609269	51	CCND1:313, VEGFD:518, BCL2L1:753, CHUK:925, STAT1:977, AKT1:1545, VEGFB:1990, CDKN2A:2404, TGFBR2:2415, MAPK9:2446, EGF:3209, MAPK3:3331, TGFB2:3498, PIK3CG:3585, RB1:3919, PLD1:4087, E2F1:4104, TGFA:4214, PIK3R5:4215, TGFB1:4293, EGFR:5182, NFKB1:5375, MAPK10:5583, ERBB2:5718, BRAF:5861, TGFBR1:6261, IKBKB:6478, PIK3CB:6664, TGFB3:6715, BRCA2:7040, CDK6:7451, JAK1:7505, PIK3CD:7669, RAF1:8339, E…	0.132971	0.182904	0.17444	0.343747
REACTOME_RRNA_PROCESSING	0.0672316	116	EXOSC3:100, RPP25:211, RPL9:227, UTP3:245, RPL36A:266, NOC4L:325, NAT10:437, RIOK2:502, FTSJ3:654, RIOK1:694, UTP20:705, NOL12:965, NOB1:1028, EXOSC10:1167, UTP25:1450, BUD23:1665, MRM2:1777, TSR1:1799, DIMT1:1885, RIOK3:2089, UTP11:2119, RPP38:2181, NOL11:2241, RBM28:2304, DDX47:2426, MPHOSPH6:2548, SENP3:2579, WDR3:2593, WDR46:2630, PRORP:2645, RCL1:2869, ISG20L2:2965, RPP40:3184, RPP30:3219, R…	0.0127556	0.0491635	0.17458	0.343747
REACTOME_INOSITOL_PHOSPHATE_METABOLISM	-0.0543118	43	NUDT3:138, PPIP5K1:255, MIOX:497, PLCH2:720, PLCD4:734, PLCB3:1118, INPP5J:1852, INPPL1:1918, INPP5D:2052, INPP4A:2609, INPP5A:2704, OCRL:2757, PLCE1:2879, ITPK1:3621, ITPKA:4103, PLCD1:4336, MINPP1:4470, INPP5B:4951, PPIP5K2:5289, PLD4:5473, IMPA2:6178, PLCG2:6186, PLCZ1:6332, PLCB2:6357, ITPKB:6505, ISYNA1:6785, IP6K2:6816, PLCG1:7562, IPMK:7898, INPP4B:8087, MTMR7:8709, PLCD3:8908, SYNJ1:9506,…	0.218536	0.238358	0.1757	0.343747
REACTOME_REGULATION_OF_TNFR1_SIGNALING	0.0809605	27	OTUD7B:167, RIPK1:369, CHUK:925, USP4:1136, MADD:1677, TNF:1713, XIAP:2084, BIRC3:2485, TRAF1:3291, USP2:3447, CLIP3:3624, OTULIN:5437, BIRC2:5672, TNFAIP3:5855, IKBKB:6478, SHARPIN:7044, TAX1BP1:7056, FADD:8086, TRADD:8225, RNF31:8840, TRAF2:10190, CFLAR:10816, USP21:10862, RBCK1:10874, SPPL2B:11115, SPPL2A:11268, CYLD:12506	0.145721	0.191124	0.17583	0.343747
REACTOME_NEGATIVE_REGULATION_OF_FGFR1_SIGNALING	0.079234	20	FGF5:526, FGF6:1648, FGF1:1663, CBL:2732, FGFR1:3154, MAPK3:3331, SPRY2:3622, KL:4047, FGF10:4145, BRAF:5861, FRS2:5970, SRC:6424, FGF23:7193, FGF17:7610, FGF20:8252, ANOS1:8636, FGF22:9642, FGF4:10685, MKNK1:11567, PTPN11:13462	0.220227	0.239039	0.17586	0.343747
REACTOME_NUCLEOTIDE_LIKE_PURINERGIC_RECEPTORS	-0.10204	16	P2RY6:177, P2RY2:441, ADORA2A:476, ADORA3:1822, ADORA1:1992, P2RY12:3501, ADORA2B:4036, P2RY10:4236, P2RY4:5635, P2RY14:5863, P2RY13:6053, P2RY11:7960, LPAR6:8873, LPAR4:9497, GPR17:12113, P2RY1:13579	0.157817	0.1979	0.17622	0.343747
REACTOME_REGULATION_OF_TP53_ACTIVITY_THROUGH_ACETYLATION	0.0972682	23	EP300:887, AKT1:1545, BRPF3:1840, PIP4K2C:1950, BRPF1:2267, RBBP7:2894, PIP4K2A:3143, GATAD2B:3564, MTA2:4185, MBD3:4197, KAT6A:5010, ING2:5780, MAP2K6:5913, CHD4:5958, PML:6880, ING5:7720, PIP4P1:7731, CHD3:8977, GATAD2A:9120, TP53:9520, BRD1:10776, AKT2:10830, BRD7:11774	0.106617	0.168295	0.17633	0.343747
REACTOME_HIGHLY_CALCIUM_PERMEABLE_POSTSYNAPTIC_NICOTINIC_ACETYLCHOLINE_RECEPTORS	0.156667	11	CHRNA3:73, CHRNA5:1887, CHRNA9:1893, CHRNA7:3140, CHRNA1:3200, CHRNB4:4620, CHRNA4:5837, CHRNB2:6479, CHRNB3:7330, CHRNA2:8234, CHRNA6:11465	0.0720722	0.13932	0.17746	0.345098
REACTOME_PROGRAMMED_CELL_DEATH	0.033292	147	H1-2:44, SATB1:277, UACA:282, RIPK1:369, IL18:459, DBNL:670, AVEN:707, PSMF1:738, BCL2L1:753, HMGB2:881, DAPK2:896, TICAM2:899, FASLG:901, PSMD1:1008, ACIN1:1106, DNM1L:1141, PSMD13:1267, BCAP31:1460, H1-4:1540, AKT1:1545, PPP3R1:2002, TJP1:2036, OPA1:2061, XIAP:2084, PAK2:2085, APC:2213, PSMD4:2289, CDKN2A:2404, ROCK1:2463, BIRC3:2485, LMNA:2496, PSMD9:2633, FNTA:2635, BMX:2729, STK26:2840, PPP3…	0.165851	0.203904	0.17948	0.348168
KEGG_RNA_POLYMERASE	0.0833801	13	POLR1E:995, POLR2F:1548, POLR3D:2006, POLR1A:2589, POLR3A:2923, POLR3GL:3702, POLR1D:5138, POLR3B:5268, POLR1C:8165, POLR1B:8422, POLR3C:10917, POLR3G:12269, POLR3H:13243	0.298093	0.275001	0.18037	0.349037
REACTOME_BBSOME_MEDIATED_CARGO_TARGETING_TO_CILIUM	-0.106681	23	BBS7:878, SMO:1232, BBS2:1363, SSTR3:1471, TTC8:1667, BBIP1:1952, BBS5:2492, RAB3IP:3272, MCHR1:4046, CCT4:4123, BBS12:4486, BBS1:4682, BBS9:5517, CCT2:5559, TCP1:5663, ARL6:5741, CCT3:7296, CCT5:7417, BBS4:9380, BBS10:9413, MKKS:10778, CCT8:11785, LZTFL1:11871	0.0767712	0.143601	0.18174	0.350324
KEGG_CHEMOKINE_SIGNALING_PATHWAY	0.0432857	119	SOS1:68, PF4:128, CXCL6:166, TIAM2:190, PF4V1:242, ITK:469, CCR2:557, CXCR5:617, CCR4:758, CHUK:925, STAT1:977, CCL1:1037, CCR10:1050, PRKACA:1458, AKT1:1545, BCAR1:1726, FOXO3:1729, XCR1:2153, CCR9:2313, CXCL14:2455, ROCK1:2463, ARRB2:2566, PTK2B:2569, NFKBIB:2660, CCL20:2744, GRK2:2791, CSK:2891, CXCR3:3119, ADCY5:3130, MAPK3:3331, PLCB1:3536, PIK3CG:3585, GNB3:3638, PLCB4:3890, SHC1:3918, PRKA…	0.104424	0.167357	0.18245	0.350324
REACTOME_NICOTINAMIDE_SALVAGING	-0.104139	15	NAMPT:498, SLC22A13:653, PARP9:877, PTGIS:994, SLC5A8:1269, NUDT12:2007, PARP14:2842, NAPRT:3362, CYP8B1:5101, PARP8:5278, NAXE:8984, PTGS2:10710, NNMT:11601, RNLS:12748, PARP16:13677	0.162769	0.201297	0.18273	0.350324
REACTOME_MAPK6_MAPK4_SIGNALING	0.0601668	59	RAG1:60, FOXO1:283, JUN:289, MMP2:303, HSPB1:559, PSMF1:738, PSMD1:1008, PSMD13:1267, PRKACA:1458, RAG2:1662, MAPK4:1719, FOXO3:1729, PAK2:2085, PSMD4:2289, KALRN:2608, PSMD9:2633, MOV10:3363, TNRC6C:3368, AGO1:3769, PSMA8:3829, PSMB4:3880, PSMD2:3993, PRKACB:4160, PSMD3:4343, PSMB11:4403, PSMB9:4409, TNRC6B:4725, PSMB10:5084, PSMB2:5295, MYC:5500, CDC42EP5:5540, PSMD8:5898, PSMD12:7927, CDC14A:7…	0.11069	0.171282	0.18281	0.350324
REACTOME_NEGATIVE_REGULATION_OF_FGFR4_SIGNALING	0.0872845	17	KLB:629, FGF6:1648, FGF1:1663, CBL:2732, MAPK3:3331, SPRY2:3622, FGF19:4437, FGFR4:5100, BRAF:5861, FRS2:5970, SRC:6424, FGF23:7193, FGF17:7610, FGF20:8252, FGF4:10685, MKNK1:11567, PTPN11:13462	0.213018	0.233964	0.18447	0.352649
REACTOME_FGFR1_LIGAND_BINDING_AND_ACTIVATION	0.108395	12	FGF5:526, FGF6:1648, FGF1:1663, FGFR1:3154, KL:4047, FGF10:4145, FGF23:7193, FGF17:7610, FGF20:8252, ANOS1:8636, FGF22:9642, FGF4:10685	0.193699	0.224225	0.18586	0.354448
REACTOME_HIV_LIFE_CYCLE	0.0560068	106	UBAP1:34, TSG101:59, GTF2F1:173, TAF4B:255, CCNT2:343, NUP153:494, NUP54:598, NELFE:644, NUP155:669, PSIP1:676, GTF2A1:798, TAF10:1062, NUP58:1124, POLR2F:1548, CDK7:1703, VPS37B:1762, TAF2:1820, TAF11:1938, GTF2E1:2015, SEC13:2080, ERCC3:2188, NUP160:2244, GTF2H4:2265, NUP88:2429, TCEA1:2514, GTF2E2:2537, CCNT1:2790, FURIN:2846, CHMP4C:2958, TAF3:3080, NUP210:3152, NEDD4L:3514, RAE1:3535, NUP37:…	0.0472015	0.10405	0.18766	0.357019
KEGG_ARACHIDONIC_ACID_METABOLISM	-0.0778583	36	PLA2G1B:207, PLA2G12A:253, PTGS1:351, GGT1:639, EPHX2:856, TBXAS1:882, PTGIS:994, PLA2G2D:1623, PTGES2:2184, GPX3:2226, ALOX12B:2380, GPX1:2383, PLA2G4A:2565, PLA2G4E:3480, PTGES:3816, PLA2G2E:3918, GPX2:4887, PLA2G3:5401, HPGDS:5535, LTC4S:6188, CYP2U1:6441, CYP2E1:6895, CBR3:6991, PLA2G5:7329, GGT6:7830, ALOX5:8251, GGT5:8913, PLA2G2F:9021, PLA2G12B:9217, PTGS2:10710, PTGDS:10859, PLA2G6:11928,…	0.106393	0.168295	0.18848	0.357717
KEGG_CYTOKINE_CYTOKINE_RECEPTOR_INTERACTION	0.074996	192	PF4:128, CXCL6:166, PF4V1:242, BMPR1A:294, PDGFA:299, IL17RA:340, IL18:459, VEGFD:518, CCR2:557, CXCR5:617, ACVR2B:741, CCR4:758, IL12A:762, FASLG:901, ACVRL1:947, LTBR:948, KIT:982, CCL1:1037, CCR10:1050, IL21:1406, IL7R:1441, KITLG:1544, IL17RB:1565, TNF:1713, IL18R1:1721, TNFSF15:1734, EPOR:1736, VEGFB:1990, GH1:1995, PDGFB:2030, TNFRSF11B:2037, IL25:2065, XCR1:2153, TNFSF14:2189, GDF5:2259, I…	0.0003745	0.00385701	0.18954	0.35831
REACTOME_DEVELOPMENTAL_BIOLOGY	0.0303336	671	KMT2A:16, NAB1:21, USP33:39, SOS1:68, NTN4:99, MYF6:136, EFNA3:186, ROBO3:205, HNF4A:208, ARHGEF12:209, RPL9:227, MED4:231, SNW1:246, TRPC6:253, RPL36A:266, SRGAP1:276, FOXO1:283, DPYSL5:287, KRT12:288, JUN:289, MMP2:303, RFX6:315, RELN:341, MYO10:403, DLG4:409, KRT20:447, MYF5:456, HOXA1:463, PAX6:482, SPTBN1:492, MAPK13:512, PKP3:514, LEFTY2:521, CACNG4:535, DSC3:540, FLRT3:570, TLN1:604, NCAM1…	0.00908987	0.0393839	0.1897	0.35831
REACTOME_DEFECTS_OF_CONTACT_ACTIVATION_SYSTEM_CAS_AND_KALLIKREIN_KININ_SYSTEM_KKS	-0.139855	14	KLKB1:925, F8:1035, GGCX:1337, GP9:1489, GP1BB:1651, GP5:2013, F11:3828, VWF:4005, TPST1:5394, F12:6607, F2:7570, F9:7912, F10:11581, TPST2:12563	0.0701296	0.136828	0.19062	0.358431
REACTOME_TRANSCRIPTIONAL_REGULATION_BY_RUNX1	0.0445587	119	PRMT6:14, KMT2A:16, PHC1:62, CTSK:74, PF4:128, ARID2:171, CCND1:313, PHC3:317, PSMF1:738, EP300:887, ELF1:957, PSMD1:1008, BLK:1096, PSMD13:1267, PHC2:1339, ELF2:1443, NR4A3:1546, RSPO3:1588, CCND2:1645, CDK7:1703, YAP1:1750, NFATC2:1809, SOCS4:1974, TJP1:2036, PSMD4:2289, CBX2:2343, LMO2:2365, KMT2E:2513, SMARCA4:2621, PSMD9:2633, SMARCA2:2979, MOV10:3363, TNRC6C:3368, KMT2B:3419, SCMH1:3445, AG…	0.0946176	0.158515	0.19109	0.358431
REACTOME_DEUBIQUITINATION	0.0495463	181	USP33:39, OTUD7B:167, SMAD7:218, TRAF6:240, RIPK1:369, KAT2A:626, PSMF1:738, INO80B:776, USP28:833, EP300:887, ADRM1:979, PSMD1:1008, TAF10:1062, ASXL2:1097, USP4:1136, CDC25A:1217, MBD5:1220, PSMD13:1267, YOD1:1409, FKBP8:1447, KDM1B:1487, USP20:1626, USP13:1634, USP47:1691, SKP2:1869, OTUD3:1881, VDAC2:1903, MDM2:2203, APC:2213, OTUD5:2242, PSMD4:2289, ATXN3:2309, TNIP3:2319, TGFBR2:2415, BIRC3…	0.0224029	0.068656	0.1915	0.358431
REACTOME_ERYTHROPOIETIN_ACTIVATES_PHOSPHOINOSITIDE_3_KINASE_PI3K	0.114693	10	EPOR:1736, GAB1:2432, PIK3CG:3585, PIK3R5:4215, LYN:4625, PIK3CB:6664, PIK3CD:7669, JAK2:7897, EPO:7917, PIK3R1:8583	0.209274	0.232664	0.19158	0.358431
REACTOME_CELLULAR_RESPONSE_TO_CHEMICAL_STRESS	-0.0387418	107	FABP1:41, AQP8:76, RXRA:133, HMOX2:169, ABCC1:310, PRKCD:329, COX6B1:448, PRDX2:547, ALB:567, PSMD10:635, CAT:723, TXNIP:879, TXN2:1279, COX5B:1319, PSMB1:1448, COX5A:1715, HMOX1:1873, GPX3:2226, COX4I1:2232, NCOR1:2237, GPX1:2383, COX18:2403, CARM1:2605, PSME3:2717, NLRP3:2775, SIN3B:2923, PSMD5:2924, PRDX5:3119, PSME1:3319, PRDX6:3392, NCOA2:3412, SURF1:3425, BACH1:3458, PSME4:3460, BLVRA:3570,…	0.167861	0.204824	0.19234	0.359002
REACTOME_STING_MEDIATED_INDUCTION_OF_HOST_IMMUNE_RESPONSES	-0.118029	13	PRKDC:1404, XRCC6:1428, TBK1:1580, DTX4:2182, TRIM21:3049, TREX1:3456, IRF3:5276, NLRC3:6068, DDX41:6587, STING1:6687, STAT6:8154, XRCC5:9906, MRE11:11146	0.14077	0.186702	0.19394	0.361134
KEGG_SMALL_CELL_LUNG_CANCER	0.055129	74	TRAF6:240, CDKN2B:241, CCND1:313, BCL2L1:753, ITGA3:792, LAMA4:890, CHUK:925, LAMB2:1195, AKT1:1545, SKP2:1869, LAMA2:1986, XIAP:2084, LAMA5:2129, CCNE2:2146, BIRC3:2485, PIAS3:2536, COL4A6:3103, COL4A1:3129, PTGS2:3203, TRAF1:3291, LAMC2:3456, PIK3CG:3585, RB1:3919, E2F1:4104, PIK3R5:4215, FN1:4253, NFKBIA:4373, TRAF5:4427, PIAS1:4464, COL4A2:4556, ITGA6:4854, LAMC3:4939, NFKB1:5375, TRAF3:5397,…	0.101982	0.16649	0.19537	0.362293
REACTOME_DOWNSTREAM_SIGNALING_OF_ACTIVATED_FGFR2	0.0858318	19	SOS1:68, FGF5:526, FGF6:1648, FGF1:1663, GAB1:2432, FGFR2:3453, FRS3:3736, SHC1:3918, FGF10:4145, FRS2:5970, PLCG1:6351, FGF23:7193, FGF17:7610, FGF20:8252, PIK3R1:8583, FGF22:9642, FGF4:10685, FGF7:12911, PTPN11:13462	0.195507	0.2248	0.19548	0.362293
REACTOME_INSULIN_RECEPTOR_SIGNALLING_CASCADE	0.0743815	40	SOS1:68, FGF5:526, KLB:629, FGF6:1648, FGF1:1663, INSR:2062, GAB2:2197, GAB1:2432, TRIB3:2886, IRS1:3116, FGFR1:3154, MAPK3:3331, FGFR2:3453, SHC1:3918, KL:4047, GRB10:4088, FGF10:4145, FGF19:4437, PIK3R4:5045, FGFR4:5100, FLT3:5116, PIK3C3:5391, PDPK1:5706, FRS2:5970, PIK3CB:6664, FGF23:7193, FGFR3:7586, FGF17:7610, FGF20:8252, PIK3R1:8583, FGF22:9642, PIK3R2:10257, PDE3B:10381, FGF4:10685, AKT2…	0.104043	0.167173	0.19601	0.362425
REACTOME_TRANSCRIPTIONAL_REGULATION_BY_RUNX2	0.050744	80	CCND1:313, MSX2:484, WWTR1:640, PSMF1:738, STAT1:977, PSMD1:1008, HEY2:1133, PSMD13:1267, SATB2:1415, AKT1:1545, GLI2:1666, YAP1:1750, SKP2:1869, MMP13:2171, PSMD4:2289, PSMD9:2633, PPARGC1B:3039, COL1A1:3242, MAPK3:3331, RBM14:3429, ESRRA:3454, ITGBL1:3488, PSMA8:3829, PSMB4:3880, UCMA:3894, RB1:3919, NR3C1:3952, RUNX2:3979, PSMD2:3993, PSMD3:4343, PSMB11:4403, PSMB9:4409, DLX5:4603, PPM1D:4724,…	0.117699	0.17638	0.19724	0.36368
REACTOME_PI_3K_CASCADE_FGFR1	0.0840664	15	FGF5:526, FGF6:1648, FGF1:1663, GAB1:2432, FGFR1:3154, KL:4047, FGF10:4145, FRS2:5970, FGF23:7193, FGF17:7610, FGF20:8252, PIK3R1:8583, FGF22:9642, FGF4:10685, PTPN11:13462	0.259838	0.258703	0.19761	0.36368
KEGG_LONG_TERM_DEPRESSION	0.0627807	49	CRH:915, IGF1:975, GNA12:1272, GRIA1:1381, CRHR1:1564, PLA2G2C:1914, PLA2G6:1985, PPP2R1B:2051, GUCY1A1:2097, PRKG2:3237, ITPR2:3244, ITPR3:3267, MAPK3:3331, GRM5:3347, GRIA3:3365, PRKCA:3376, PLCB1:3536, PLCB4:3890, GNA13:4170, LYN:4625, PLA2G12B:4696, RYR1:4779, PLA2G2F:4892, GRID2:4985, PRKCG:5085, BRAF:5861, PRKCB:6560, PLA2G5:6584, PPP1R17:6904, ITPR1:7081, GUCY1A2:7101, GRM1:7471, PLCB2:755…	0.129083	0.180212	0.19825	0.363803
REACTOME_CELLULAR_RESPONSE_TO_HEAT_STRESS	0.0556893	77	CRYBA4:176, HSPB2:292, HSPH1:424, NUP153:494, HSPB1:559, NUP54:598, NUP155:669, RPTOR:865, HSPA14:885, EP300:887, NUP58:1124, SERPINH1:1330, BAG3:1421, BAG1:1687, SEC13:2080, CAMK2B:2103, NUP160:2244, AKT1S1:2400, NUP88:2429, COL4A6:3103, NUP210:3152, ATR:3157, MAPKAPK2:3274, MAPK3:3331, RAE1:3535, NUP37:3561, NUP50:3627, HSPB8:3848, NUP214:3850, NUP188:3885, TPR:4025, TNFRSF21:4056, CAMK2A:4284,…	0.0920305	0.156123	0.19918	0.363803
REACTOME_PROCESSING_OF_SMDT1	-0.105568	14	AFG3L2:957, MICU2:1617, MCU:2930, STOML2:3159, YME1L1:3307, PMPCA:3785, MCUB:3796, PMPCB:4985, MICU3:5412, MAIP1:5449, PARL:6960, SPG7:8491, MICU1:11749, SMDT1:11914	0.171603	0.207724	0.19943	0.363803
REACTOME_PURINE_SALVAGE	-0.142988	13	HPRT1:687, ADK:1427, DGUOK:1577, ADAL:1990, GMPR2:3033, APRT:3302, GMPR:3538, AMPD3:4722, PNP:5637, DCK:6578, AMPD2:7341, AMPD1:9519, ADA:13257	0.0743583	0.14286	0.19952	0.363803
REACTOME_REGULATION_OF_SIGNALING_BY_CBL	-0.0928086	13	YES1:200, HCK:908, SYK:1733, PIK3R3:3305, PIK3R2:3656, RAPGEF1:5039, PIK3R1:5330, PIK3CD:6244, PIK3CB:7249, BLNK:8116, LYN:9288, VAV1:9300, CBL:11181	0.246785	0.252922	0.20029	0.364288
REACTOME_CELL_EXTRACELLULAR_MATRIX_INTERACTIONS	0.0920822	14	LIMS2:13, FLNA:307, FERMT2:314, TESK1:542, LIMS1:3872, PARVB:4102, FLNC:5462, PXN:6233, ACTN1:7977, VASP:8012, FBLIM1:9590, ILK:11200, ARHGEF6:11759, ITGB1:11929	0.23309	0.244471	0.20123	0.364288
REACTOME_NEDDYLATION	0.0466142	164	WSB1:38, FBXW5:573, COMMD10:720, PSMF1:738, KBTBD7:846, BTBD6:989, PSMD1:1008, DCAF5:1226, FBXL12:1243, BTBD1:1247, PSMD13:1267, UBA3:1404, ASB12:1471, COMMD4:1505, COMMD2:1519, DCAF6:1552, ERCC8:1575, KLHL2:1597, SPSB2:1789, KLHL11:1807, SKP2:1869, KLHL25:2010, GAN:2110, PSMD4:2289, FBXO22:2408, FBXL22:2421, DCAF8:2585, PSMD9:2633, ASB9:2736, FBXL4:2853, RBBP7:2894, GPS1:2921, ASB16:3016, ASB15:…	0.0406472	0.0985538	0.20128	0.364288
REACTOME_GRB2_EVENTS_IN_ERBB2_SIGNALING	0.105085	11	SOS1:68, EGF:3209, NRG1:3359, ERBB4:4029, BTC:5061, EGFR:5182, ERBB2:5718, EREG:6088, NRG2:7642, NRG3:7863, HBEGF:13854	0.22764	0.241303	0.20224	0.364288
REACTOME_RAB_REGULATION_OF_TRAFFICKING	0.0486504	88	TBC1D20:12, RIN2:575, GDI1:581, RAB3IL1:987, RABGEF1:1014, RAB5C:1069, AKT1:1545, RAB27B:1622, DENND5B:1664, MADD:1677, CCZ1B:1773, RIC1:1787, RABEP1:1827, TSC1:2059, CCZ1:2172, RINL:2202, RGP1:2298, SBF1:2351, DENND4A:2354, ULK1:2442, RIN1:2510, RAB38:2801, GGA1:2821, DENND2B:2944, CHML:2992, RAB7B:3112, HPS4:3320, ANKRD27:3600, DENND4C:3866, TRAPPC6A:4487, TBC1D16:5022, DENND1A:5165, GGA3:5167,…	0.115859	0.17638	0.20275	0.364288
REACTOME_DOWNSTREAM_SIGNALING_OF_ACTIVATED_FGFR3	0.0887728	15	SOS1:68, FGF5:526, FGF1:1663, GAB1:2432, FRS3:3736, SHC1:3918, FRS2:5970, PLCG1:6351, FGF23:7193, FGFR3:7586, FGF17:7610, FGF20:8252, PIK3R1:8583, FGF4:10685, PTPN11:13462	0.234103	0.245124	0.2032	0.364288
REACTOME_G_ALPHA_I_SIGNALLING_EVENTS	0.0411385	221	GRM6:78, GABBR1:84, PF4:128, RHO:129, GPR37:134, CXCL6:166, OPN1LW:207, CAMKK2:305, RXFP3:312, NPY2R:477, GRM2:505, GNAT2:519, CCR2:557, GAL:558, CXCR5:617, HTR1F:620, KPNA2:740, CCR4:758, GNA14:818, NBEA:894, GRM8:963, CCL1:1037, CCR10:1050, RGS8:1051, OPRM1:1088, BDKRB1:1118, OPRK1:1244, PPP1CA:1332, GRM4:1451, PRKACA:1458, GNAT3:1557, PSAP:1617, PDE1B:1669, OPN1MW:1707, PCP2:1776, GPR17:1800, …	0.0366341	0.0938244	0.20395	0.364288
REACTOME_THYROXINE_BIOSYNTHESIS	-0.11207	10	IYD:27, DIO1:415, SLC5A5:1612, DUOX2:1663, DIO2:1813, TPO:2389, DIO3:8887, CGA:10423, TSHB:12139, DUOX1:13445	0.219879	0.239039	0.20407	0.364288
REACTOME_TRANSCRIPTION_COUPLED_NUCLEOTIDE_EXCISION_REPAIR_TC_NER	0.0587111	51	RFC5:606, AQR:827, EP300:887, ISY1:1147, POLR2F:1548, ERCC8:1575, CDK7:1703, ERCC3:2188, XPA:2229, GTF2H4:2265, ZNF830:2388, POLE:2473, TCEA1:2514, POLD2:2855, GPS1:2921, LIG3:2986, CUL4B:3215, ERCC4:3584, RFC3:3707, COPS7B:3859, XAB2:3957, COPS4:4021, POLE4:4120, PPIE:4165, POLE2:4316, GTF2H1:5409, ELL:5778, RFC1:5834, POLD3:6287, UVSSA:7051, RPA1:7635, RPA3:8049, USP7:8271, RFC2:8274, POLD1:828…	0.147661	0.192463	0.20411	0.364288
REACTOME_DUAL_INCISION_IN_TC_NER	0.0659312	43	RFC5:606, AQR:827, EP300:887, ISY1:1147, POLR2F:1548, ERCC8:1575, CDK7:1703, ERCC3:2188, XPA:2229, GTF2H4:2265, ZNF830:2388, POLE:2473, TCEA1:2514, POLD2:2855, CUL4B:3215, ERCC4:3584, RFC3:3707, XAB2:3957, POLE4:4120, PPIE:4165, POLE2:4316, GTF2H1:5409, RFC1:5834, POLD3:6287, UVSSA:7051, RPA1:7635, RPA3:8049, USP7:8271, RFC2:8274, POLD1:8281, RPA2:9215, HMGN1:9249, MNAT1:10031, POLK:10049, GTF2H3…	0.135263	0.183559	0.2044	0.364288
REACTOME_REGULATION_OF_PYRUVATE_DEHYDROGENASE_PDH_COMPLEX	-0.110585	16	RXRA:133, PDPR:206, GSTZ1:667, PPARD:1850, DLD:1875, PDP2:1877, PDP1:3092, PDK2:3484, PDHA2:5890, PDK1:6077, DLAT:7356, PDHX:8401, PDHB:8578, PDK4:9446, PDK3:12690, PDHA1:12821	0.125838	0.177434	0.20572	0.365815
KEGG_T_CELL_RECEPTOR_SIGNALING_PATHWAY	0.0501433	91	MAP3K14:31, SOS1:68, PTPN6:228, JUN:289, BCL10:309, ITK:469, MAPK13:512, NCK2:788, CHUK:925, ZAP70:1045, CD28:1251, PPP3R2:1446, AKT1:1545, TNF:1713, NFATC2:1809, CARD11:1830, PPP3R1:2002, PAK2:2085, TEC:2254, LCK:2414, MAPK9:2446, MALT1:2546, NFKBIB:2660, CBL:2732, PPP3CC:2883, MAP2K7:3060, MAPK3:3331, PIK3CG:3585, IL2:4071, PIK3R5:4215, NFKBIA:4373, IL10:4554, VAV1:4613, CD3G:4680, CD247:4972, …	0.0994069	0.163487	0.20749	0.367325
KEGG_N_GLYCAN_BIOSYNTHESIS	-0.0681541	43	ST6GAL1:216, MGAT2:485, B4GALT1:513, DPM2:537, DPM1:596, MAN2A1:710, DOLPP1:1084, FUT8:1583, ALG10:2204, ALG10B:2207, ALG6:2689, GANAB:2746, MAN1A1:3162, ALG1:3899, MAN1B1:4355, RPN2:4384, RPN1:4444, MGAT4A:4614, MAN1C1:5037, DDOST:5567, MAN1A2:6019, MGAT5B:6170, ALG5:6414, ALG8:7015, DPAGT1:7065, B4GALT2:7189, DPM3:7250, ALG2:7400, STT3B:7730, MOGS:7833, ALG14:7937, MGAT5:8114, MGAT3:8253, MGAT4…	0.122582	0.17638	0.2075	0.367325
KEGG_ECM_RECEPTOR_INTERACTION	0.0689072	79	COL11A2:264, RELN:341, ITGA8:616, ITGB7:631, ITGA3:792, LAMA4:890, ITGA11:946, CHAD:1063, ITGA10:1079, LAMB2:1195, ITGB6:1236, DAG1:1297, COL5A2:1439, HMMR:1481, ITGB4:1555, ITGB3:1814, LAMA2:1986, COL6A2:2106, LAMA5:2129, ITGA9:2551, COL4A6:3103, COL4A1:3129, ITGA1:3158, COL1A1:3242, THBS3:3254, TNC:3337, LAMC2:3456, SDC2:3473, SV2C:3591, SDC4:3818, FN1:4253, COL4A2:4556, HSPG2:4853, ITGA6:4854,…	0.0347458	0.0917179	0.20868	0.368588
REACTOME_DISASSEMBLY_OF_THE_DESTRUCTION_COMPLEX_AND_RECRUITMENT_OF_AXIN_TO_THE_MEMBRANE	0.0797597	22	DVL2:773, FZD1:1059, PPP2R1B:2051, APC:2213, PPP2R5B:2220, CSNK1G2:2712, PPP2R5D:2802, LRP6:2803, DVL1:3169, WNT3A:3172, AMER1:4335, PPP2R5A:5311, WNT8A:5678, LRP5:6323, DVL3:6407, FZD5:9613, CAV1:9922, WNT1:10955, WNT8B:11187, PPP2R5C:12018, AXIN1:13412, GSK3B:13482	0.19562	0.2248	0.20934	0.368928
REACTOME_PRE_NOTCH_EXPRESSION_AND_PROCESSING	0.0675445	43	SNW1:246, JUN:289, CCND1:313, NOTCH2:493, KAT2A:626, NOTCH4:716, MAML2:870, EP300:887, NOTCH3:1655, ATP2A3:2471, MAML3:2481, FURIN:2846, MOV10:3363, TNRC6C:3368, AGO1:3769, RBPJ:3830, LFNG:3930, E2F1:4104, TNRC6B:4725, POFUT1:4903, ST3GAL3:5558, ELF3:5570, TFDP2:6107, MFNG:7488, TFDP1:7968, TNRC6A:8046, RFNG:8048, NOTCH1:8247, E2F3:8364, SEL1L:8474, ST3GAL4:8688, KAT2B:8758, TP53:9520, CREBBP:999…	0.125963	0.177434	0.21064	0.370392
REACTOME_REGULATION_OF_GENE_EXPRESSION_IN_LATE_STAGE_BRANCHING_MORPHOGENESIS_PANCREATIC_BUD_PRECURSOR_CELLS	0.118533	14	SNW1:246, KAT2A:626, MAML2:870, EP300:887, HNF1B:1239, MAML3:2481, RBPJ:3830, NEUROG3:4986, NOTCH1:8247, KAT2B:8758, CREBBP:9993, MAML1:10196, ONECUT1:10644, ONECUT3:12974	0.124793	0.176977	0.21162	0.371289
KEGG_STEROID_BIOSYNTHESIS	-0.122638	16	LIPA:703, SOAT2:1431, CYP27B1:1961, SQLE:2589, DHCR24:2986, SC5D:3411, SOAT1:3901, LSS:4955, MSMO1:5010, NSDHL:5118, HSD17B7:6075, FDFT1:6837, DHCR7:7511, CYP51A1:8317, TM7SF2:8922, EBP:11583	0.0895893	0.154626	0.21413	0.374292
REACTOME_TNF_SIGNALING	0.0670267	36	OTUD7B:167, RIPK1:369, CHUK:925, USP4:1136, MADD:1677, TNF:1713, TAB3:1772, XIAP:2084, SMPD3:2405, BIRC3:2485, ADAM17:2597, TRAF1:3291, USP2:3447, CLIP3:3624, TAB1:3932, OTULIN:5437, BIRC2:5672, TNFAIP3:5855, IKBKB:6478, SHARPIN:7044, TAX1BP1:7056, NSMAF:7278, FADD:8086, TRADD:8225, RNF31:8840, TAB2:9060, TRAF2:10190, SMPD2:10512, CFLAR:10816, USP21:10862, RBCK1:10874, MAP3K7:10954, SPPL2B:11115,…	0.16453	0.203076	0.21428	0.374292
REACTOME_ANTIVIRAL_MECHANISM_BY_IFN_STIMULATED_GENES	0.0596401	57	EIF4E3:120, FLNA:307, NUP153:494, NUP54:598, NUP155:669, KPNA2:740, STAT1:977, PPM1B:1065, NUP58:1124, EIF2AK2:1473, SEC13:2080, NUP160:2244, NUP88:2429, NUP210:3152, MAPK3:3331, RAE1:3535, NUP37:3561, NUP50:3627, NUP214:3850, NUP188:3885, RNASEL:4014, KPNA5:4017, TPR:4025, NUP107:4564, KPNA7:4787, USP41:4958, NEDD4:6304, NUP205:6327, PLCG1:6351, UBE2N:6430, USP18:6805, NUP35:7250, EIF4E:7427, JA…	0.120114	0.17638	0.21588	0.375487
REACTOME_ANCHORING_OF_THE_BASAL_BODY_TO_THE_PLASMA_MEMBRANE	0.0667288	78	AHI1:98, TMEM216:316, SEPTIN2:538, CEP164:567, CEP250:780, MKS1:787, OFD1:1081, PRKACA:1458, TCTN2:1685, CEP57:1861, NEK2:1921, DCTN3:2160, SCLT1:2247, B9D2:2249, CEP131:2572, CEP41:2587, HAUS4:2652, CEP43:2717, SDCCAG8:2725, CKAP5:2928, CEP97:3074, C2CD3:3187, NINL:3300, CEP83:3505, CEP162:4101, CSNK1D:4270, NPHP4:4372, NDE1:4479, HAUS5:4608, TCTN3:4645, CEP70:4824, IQCB1:4932, NEDD1:5021, CEP89…	0.0421833	0.0986841	0.21622	0.375487
REACTOME_INFECTIOUS_DISEASE	0.0246087	520	UBAP1:34, TSG101:59, PGK1:150, CBLL1:158, GTF2F1:173, RPL9:227, PARP16:236, TAF4B:255, RPL36A:266, JUN:289, CCNT2:343, RIPK1:369, GALNT1:401, MYO10:403, IL18:459, SYT1:462, DUSP16:470, NUP153:494, ZCRB1:501, GPR83:541, NCKIPSD:547, NUP54:598, NELFE:644, AP2M1:647, EZH2:657, NUP155:669, PSIP1:676, PSMF1:738, KPNA2:740, DVL2:773, GTF2A1:798, ST3GAL2:811, GPR150:878, CRH:915, PTH1R:919, GHRHR:986, P…	0.0599018	0.122583	0.21707	0.375487
REACTOME_ROLE_OF_SECOND_MESSENGERS_IN_NETRIN_1_SIGNALING	0.148865	10	TRPC6:253, TRPC4:848, TRPC1:2079, TRPC7:2487, TRPC3:4588, PITPNA:4870, PLCG1:6351, DCC:7957, TRPC5:7961, NTN1:12835	0.103177	0.167173	0.21767	0.375487
REACTOME_INTRINSIC_PATHWAY_OF_FIBRIN_CLOT_FORMATION	-0.121435	20	A2M:885, KLKB1:925, F8:1035, GP9:1489, GP1BB:1651, SERPIND1:1795, GP5:2013, PROS1:3726, F11:3828, VWF:4005, SERPINE2:5928, PROC:6567, F12:6607, F2:7570, SERPINA5:7751, F9:7912, SERPINC1:8184, PRCP:9157, C1QBP:9337, F10:11581	0.0602635	0.122923	0.21813	0.375487
REACTOME_PCP_CE_PATHWAY	0.0588822	58	AP2M1:647, PSMF1:738, DVL2:773, ROR2:873, PSMD1:1008, FZD1:1059, FZD7:1138, PSMD13:1267, PRICKLE1:1403, DAAM1:1520, PSMD4:2289, ROR1:2398, ARRB2:2566, PSMD9:2633, DVL1:3169, WNT5B:3264, PRKCA:3376, WNT11:3423, PSMA8:3829, PSMB4:3880, PSMD2:3993, PSMD3:4343, PSMB11:4403, PSMB9:4409, WNT5A:4995, PSMB10:5084, PRKCG:5085, PSMB2:5295, PARD6A:5367, PSMD8:5898, FZD6:6313, AP2A2:6374, DVL3:6407, SMURF2:6…	0.121658	0.17638	0.21835	0.375487
REACTOME_SIGNALING_BY_FGFR1_IN_DISEASE	0.0642918	28	SOS1:68, STAT5A:471, FGF5:526, STAT1:977, FGF6:1648, FGF1:1663, GAB2:2197, GAB1:2432, CEP43:2717, FGFR1:3154, MYO18A:5636, FRS2:5970, STAT5B:6114, PLCG1:6351, ERLIN2:6837, TRIM24:7139, FGF23:7193, FGF17:7610, FGF20:8252, LRRFIP1:8282, PIK3R1:8583, CNTRL:9366, CUX1:10624, FGF4:10685, FGFR1OP2:11679, BCR:11812, BAG4:12278, ZMYM2:13494	0.239429	0.248654	0.21936	0.375487
REACTOME_IRF3_MEDIATED_INDUCTION_OF_TYPE_I_IFN	-0.123954	11	PRKDC:1404, XRCC6:1428, TBK1:1580, DTX4:2182, TREX1:3456, IRF3:5276, NLRC3:6068, DDX41:6587, STING1:6687, XRCC5:9906, MRE11:11146	0.154711	0.196755	0.21957	0.375487
REACTOME_DECTIN_1_MEDIATED_NONCANONICAL_NF_KB_SIGNALING	0.0626133	34	MAP3K14:31, PSMF1:738, CHUK:925, PSMD1:1008, PSMD13:1267, UBA3:1404, PSMD4:2289, PSMD9:2633, RELB:3754, PSMA8:3829, PSMB4:3880, PSMD2:3993, PSMD3:4343, PSMB11:4403, PSMB9:4409, CCL22:4445, PSMB10:5084, PSMB2:5295, PSMD8:5898, PSMD12:7927, PSME2:8228, PSMD6:8496, PSMB7:8709, PSMB8:9272, NFKB2:9725, PSMB6:9847, PSMB5:9913, PSME4:10453, PSME1:10594, PSMD5:10989, RELA:11111, PSME3:11196, PSMB1:12465,…	0.206935	0.231586	0.21965	0.375487
REACTOME_UCH_PROTEINASES	0.0560586	52	SMAD7:218, PSMF1:738, INO80B:776, ADRM1:979, PSMD1:1008, ASXL2:1097, MBD5:1220, PSMD13:1267, KDM1B:1487, PSMD4:2289, TGFBR2:2415, PSMD9:2633, BARD1:3740, PSMA8:3829, PSMB4:3880, PSMD2:3993, TGFB1:4293, PSMD3:4343, PSMB11:4403, PSMB9:4409, INO80D:4861, PSMB10:5084, PSMB2:5295, USP15:5682, UCHL1:5894, PSMD8:5898, HCFC1:6177, TGFBR1:6261, BAP1:6814, MCRS1:7654, NFRKB:7862, PSMD12:7927, TFPT:7939, PS…	0.162764	0.201297	0.21972	0.375487
REACTOME_HEDGEHOG_OFF_STATE	0.0498831	72	IFT172:390, PSMF1:738, MKS1:787, SUFU:815, PSMD1:1008, OFD1:1081, PSMD13:1267, PTCH1:1454, PRKACA:1458, GLI2:1666, TUBB1:2046, PSMD4:2289, WDR35:2424, PSMD9:2633, KIF7:2659, DYNC2H1:2920, TULP3:2931, TTC21B:3036, ADCY5:3130, IFT57:3178, PSMA8:3829, PSMB4:3880, KIF3A:3974, PSMD2:3993, PRKACB:4160, PSMD3:4343, PSMB11:4403, PSMB9:4409, ADCY2:4685, PSMB10:5084, GPR161:5240, PSMB2:5295, INTU:5308, PRK…	0.144358	0.19053	0.22061	0.376194
REACTOME_INNATE_IMMUNE_SYSTEM	-0.0278951	678	PDXK:19, FTH1:39, BPIFB1:50, PRSS3:51, ICAM2:58, ANO6:80, MIF:83, AOC1:115, PGM2:124, SLC44A2:168, HMOX2:169, PAK3:186, YES1:200, MMP8:224, TRPM2:231, PTAFR:232, RAB31:256, ATP6V1C2:293, DOK3:312, PRKCD:329, SCAMP1:370, GCA:423, CD44:426, MMP9:428, PTPN11:451, PYGL:452, SYNGR1:489, B4GALT1:513, CD36:522, ACAA1:551, CPNE3:564, ATP6V0A4:568, ATP11B:574, TLR2:579, CASP9:600, PADI2:617, PSMD10:635, R…	0.0159386	0.056377	0.22304	0.378601
REACTOME_ONCOGENE_INDUCED_SENESCENCE	0.0872369	26	CDKN2B:241, ID1:377, MDM2:2203, CDKN2A:2404, MDM4:2509, CDKN2D:3161, MAPK3:3331, MOV10:3363, TNRC6C:3368, AGO1:3769, RB1:3919, E2F1:4104, TNRC6B:4725, CDKN2C:5446, TFDP2:6107, ETS1:6310, CDK6:7451, TFDP1:7968, TNRC6A:8046, E2F3:8364, TP53:9520, E2F2:10520, CDK4:10605, SP1:10757, ETS2:11618, ERF:13107	0.123954	0.17638	0.22343	0.378601
REACTOME_RNA_POLYMERASE_III_TRANSCRIPTION_INITIATION_FROM_TYPE_1_PROMOTER	0.0904316	20	GTF3C3:434, GTF3C2:1090, POLR2F:1548, POLR3D:2006, GTF3C4:2208, POLR3A:2923, POLR3GL:3702, TBP:4653, GTF3A:4763, POLR1D:5138, POLR3B:5268, GTF3C5:5901, CRCP:7734, BRF1:7815, POLR3E:8057, POLR1C:8165, GTF3C1:9143, POLR3C:10917, POLR3G:12269, POLR3H:13243	0.16176	0.20127	0.22346	0.378601
REACTOME_SIGNALLING_TO_ERKS	0.0692036	20	SOS1:68, MAPK13:512, MAPKAPK3:648, NGF:1980, MAPKAPK2:3274, MAPK3:3331, SHC1:3918, SHC3:4286, BRAF:5861, FRS2:5970, SRC:6424, MAPK11:7054, RIT2:7616, MAP2K2:8447, RAPGEF1:8874, SHC2:10015, KIDINS220:10721, NTRK1:10959, RIT1:11059, MAPK12:11787	0.28429	0.268036	0.22577	0.381695
KEGG_PROSTATE_CANCER	0.0583646	72	SOS1:68, FOXO1:283, PDGFA:299, CCND1:313, PDGFD:354, CREB5:660, EP300:887, CHUK:925, IGF1:975, SRD5A2:1387, AKT1:1545, PDGFB:2030, CREB3L2:2054, CCNE2:2146, MDM2:2203, TCF7L1:2264, PDGFC:2370, FGFR1:3154, EGF:3209, PDGFRA:3316, MAPK3:3331, FGFR2:3453, PIK3CG:3585, PDGFRB:3745, RB1:3919, E2F1:4104, TGFA:4214, PIK3R5:4215, NFKBIA:4373, EGFR:5182, MTOR:5297, CREB3L4:5313, NFKB1:5375, PDPK1:5706, ERB…	0.0876454	0.152107	0.22729	0.383444
KEGG_SPHINGOLIPID_METABOLISM	-0.0782419	38	ENPP7:218, SMPD4:548, SPHK1:1262, SGPP1:1423, GLB1:1560, NEU4:1761, ACER1:1865, DEGS2:2301, ACER3:2314, DEGS1:2736, SGPL1:2838, SGPP2:2919, NEU1:3295, SMPD2:3401, GALC:3714, GBA:3890, UGT8:4033, SPTLC1:4037, NEU3:4574, KDSR:5360, CERK:5719, GLA:5841, ASAH2:5849, PLPP3:6150, ARSA:6235, SPHK2:6248, NEU2:6913, GAL3ST1:8155, SGMS1:8988, ASAH1:9507, PLPP2:10038, SPTLC2:10746, PLPP1:11195, SMPD3:11508,…	0.0955473	0.159647	0.22857	0.384781
REACTOME_TRANSCRIPTIONAL_REGULATION_BY_TP53	0.0401131	263	RABGGTB:97, GTF2F1:173, TAF4B:255, HIPK1:278, JUN:289, CCNT2:343, CRADD:475, SESN3:489, RFC5:606, CNOT1:612, NELFE:644, CNOT6:682, ZNF385A:856, RPTOR:865, EP300:887, HUS1:932, SESN1:1032, TAF10:1062, E2F4:1071, SMYD2:1101, GLS:1262, PLK2:1474, AKT1:1545, POLR2F:1548, RRAGD:1605, RAD50:1608, SCO2:1628, CDK7:1703, MSH2:1754, TAF2:1820, BRPF3:1840, RMI2:1904, TAF11:1938, PIP4K2C:1950, COX19:1987, TA…	0.0266151	0.0769767	0.23301	0.390432
REACTOME_RETINOID_CYCLE_DISEASE_EVENTS	0.122122	13	OPN1LW:207, ABCA4:691, TTR:1407, STRA6:1604, OPN1MW:1707, RLBP1:2854, RBP4:5172, RBP1:5196, OPN1SW:5965, LRAT:8829, RDH5:11753, RDH12:12268, NAPEPLD:12371	0.127507	0.178409	0.23325	0.390432
REACTOME_ADHERENS_JUNCTIONS_INTERACTIONS	0.0862695	27	CADM3:54, CDH8:184, NECTIN1:251, CADM1:320, CDH18:1179, CDH9:1386, NECTIN4:2041, CDH10:2360, JUP:2860, CDH6:2906, CDH15:3816, CTNND1:5571, CDH5:5705, CDH1:6137, CTNNA1:6385, AFDN:7173, CDH13:7536, CDH4:7924, CADM2:8125, CDH3:8485, NECTIN2:9212, CDH7:9555, CDH2:11216, CDH11:11267, NECTIN3:11297, CDH12:12586, CDH17:13640	0.12109	0.17638	0.23341	0.390432
REACTOME_REGULATION_OF_MRNA_STABILITY_BY_PROTEINS_THAT_BIND_AU_RICH_ELEMENTS	0.0498402	54	EXOSC3:100, HSPB1:559, PSMF1:738, HNRNPD:897, DCP1A:923, PSMD1:1008, PSMD13:1267, AKT1:1545, PSMD4:2289, ANP32A:2300, PSMD9:2633, ZFP36:3259, MAPKAPK2:3274, PRKCA:3376, PSMA8:3829, NUP214:3850, PSMB4:3880, PSMD2:3993, PSMD3:4343, PSMB11:4403, PSMB9:4409, PSMB10:5084, EXOSC6:5292, PSMB2:5295, EXOSC2:5591, EXOSC8:5851, PSMD8:5898, EXOSC9:6405, PARN:6536, MAPK11:7054, KHSRP:7175, XRN1:7533, SET:7828…	0.206056	0.23143	0.23404	0.390658
REACTOME_HIV_TRANSCRIPTION_ELONGATION	0.0870585	24	GTF2F1:173, NELFE:644, POLR2F:1548, CDK7:1703, ERCC3:2188, GTF2H4:2265, TCEA1:2514, CCNT1:2790, SUPT5H:3595, NCBP1:3785, NELFB:3978, NELFCD:4291, GTF2H1:5409, ELL:5778, ELOA:6303, CTDP1:6581, SUPT16H:7406, SSRP1:8439, MNAT1:10031, GTF2H3:10860, NELFA:11217, CCNH:12931, GTF2H2:13357, ERCC2:13518	0.140161	0.186702	0.23565	0.391988
REACTOME_TCF_DEPENDENT_SIGNALING_IN_RESPONSE_TO_WNT	0.0402143	119	RSPO1:233, BCL9:323, PSMF1:738, DVL2:773, SOX4:801, EP300:887, SOX6:916, PSMD1:1008, FZD1:1059, CBY1:1094, BCL9L:1127, PSMD13:1267, AKT1:1545, RSPO3:1588, WNT9A:1615, DKK1:1646, RSPO4:1741, CCDC88C:1931, PPP2R1B:2051, XIAP:2084, APC:2213, PPP2R5B:2220, TCF7L1:2264, PSMD4:2289, ZNRF3:2322, DACT1:2545, SMARCA4:2621, PSMD9:2633, CSNK1G2:2712, PPP2R5D:2802, LRP6:2803, AXIN2:2962, DKK2:3073, DVL1:3169…	0.131412	0.182157	0.23583	0.391988
REACTOME_GLYCOGEN_SYNTHESIS	-0.114492	11	PGM2:124, GYS2:390, GBE1:1488, PPP1R3C:3841, NHLRC1:4746, GYS1:5726, PGM2L1:6566, GYG1:6827, UGP2:7173, PGM1:9033, EPM2A:11388	0.188693	0.220755	0.23638	0.392077
REACTOME_DISEASES_OF_CARBOHYDRATE_METABOLISM	-0.0767106	27	SI:46, GYS2:390, DCXR:1003, ALDOB:1149, GBE1:1488, GLB1:1560, LCT:1866, HGSNAT:2477, IDUA:2555, PPP1R3C:3841, NAGLU:4267, NHLRC1:4746, ARSB:4924, GYS1:5726, SGSH:6328, KHK:6586, GYG1:6827, G6PC3:6961, GUSB:7670, GALNS:8204, TALDO1:8685, HYAL1:9023, IDS:9833, EPM2A:11388, SLC37A4:11531, RPIA:12059, GNS:13758	0.168066	0.204824	0.24026	0.397574
REACTOME_PI3K_EVENTS_IN_ERBB2_SIGNALING	0.0920049	13	GAB1:2432, ERBB3:2824, EGF:3209, NRG1:3359, ERBB4:4029, BTC:5061, EGFR:5182, ERBB2:5718, EREG:6088, NRG2:7642, NRG3:7863, PIK3R1:8583, HBEGF:13854	0.2509	0.254884	0.24165	0.397574
REACTOME_HEDGEHOG_LIGAND_BIOGENESIS	0.0521207	40	PSMF1:738, PSMD1:1008, PSMD13:1267, SYVN1:1357, PSMD4:2289, ADAM17:2597, PSMD9:2633, PSMA8:3829, PSMB4:3880, ERLEC1:3896, PSMD2:3993, DHH:4206, PSMD3:4343, PSMB11:4403, PSMB9:4409, P4HB:4690, OS9:4704, NOTUM:4839, PSMB10:5084, PSMB2:5295, HHAT:5703, PSMD8:5898, IHH:6548, SCUBE2:6911, PSMD12:7927, PSME2:8228, SEL1L:8474, PSMD6:8496, PSMB7:8709, PSMB8:9272, SHH:9782, PSMB6:9847, PSMB5:9913, PSME4:1…	0.254676	0.255655	0.24193	0.397574
REACTOME_INTEGRIN_SIGNALING	0.0544689	21	SOS1:68, TLN1:604, AKT1:1545, BCAR1:1726, ITGB3:1814, CSK:2891, SHC1:3918, FN1:4253, FGB:4905, PDPK1:5706, PTK2:6060, SRC:6424, RAPGEF3:6608, RAPGEF4:7534, PTPN1:9372, VWF:9908, RASGRP2:10254, RASGRP1:11242, SYK:12180, FGG:12853, ITGA2B:13358	0.387855	0.311995	0.24262	0.397574
REACTOME_HIV_TRANSCRIPTION_INITIATION	0.0778873	28	GTF2F1:173, TAF4B:255, GTF2A1:798, TAF10:1062, POLR2F:1548, CDK7:1703, TAF2:1820, TAF11:1938, GTF2E1:2015, ERCC3:2188, GTF2H4:2265, GTF2E2:2537, TAF3:3080, TAF9:3730, TAF7:3911, TBP:4653, GTF2H1:5409, TAF9B:8434, TAF6:8922, MNAT1:10031, GTF2H3:10860, TAF1:12140, TAF7L:12539, TAF15:12608, CCNH:12931, GTF2H2:13357, TAF5:13425, ERCC2:13518	0.154104	0.196755	0.24291	0.397574
REACTOME_LONG_TERM_POTENTIATION	0.0945206	19	LRRC7:247, DLG4:409, DLG3:688, GRIA1:1381, CAMK2B:2103, NRG1:3359, ACTN2:3581, ERBB4:4029, CAMK2A:4284, GRIN2B:5186, DLG1:5494, SRC:6424, DLG2:7100, GRIN2C:7465, GRIN1:9078, GRIN2A:11350, GRIA2:11534, NEFL:12560, GRIN2D:13553	0.154013	0.196755	0.24348	0.397574
REACTOME_TFAP2_AP_2_FAMILY_REGULATES_TRANSCRIPTION_OF_GROWTH_FACTORS_AND_THEIR_RECEPTORS	0.111682	10	KIT:982, TFAP2C:2476, ATAD2:2544, CGA:3490, TGFA:4214, EGFR:5182, ERBB2:5718, ESR1:8197, VEGFA:9951, CGB5:12707	0.221482	0.239491	0.24386	0.397574
REACTOME_ESTROGEN_DEPENDENT_GENE_EXPRESSION	0.0569383	57	GTF2F1:173, JUN:289, CCND1:313, CXXC5:592, KPNA2:740, FOSB:768, GTF2A1:798, POU2F1:864, MED1:868, EP300:887, USF2:1523, POLR2F:1548, KANK1:1579, NRIP1:2386, KDM1A:2751, CCNT1:2790, MOV10:3363, EBAG9:3366, TNRC6C:3368, AGO1:3769, ERBB4:4029, TGFA:4214, STAG2:4301, TBP:4653, TNRC6B:4725, MYB:5107, MYC:5500, CTSD:5632, GREB1:5689, NR5A2:5734, NCOA1:6011, FOXA1:7307, ATF2:8004, TNRC6A:8046, ESR1:8197…	0.13784	0.185433	0.2439	0.397574
REACTOME_CHEMOKINE_RECEPTORS_BIND_CHEMOKINES	0.0987636	36	PF4:128, CXCL6:166, CCR2:557, CXCR5:617, CCR4:758, CCL1:1037, CCR10:1050, ACKR4:1714, XCR1:2153, CCR9:2313, CCL20:2744, CXCR3:3119, CCR7:4208, CCL22:4445, CCR5:5115, CCL25:5299, ACKR2:5488, CCR8:5510, CXCL9:5696, CCL5:6822, CCL21:7014, CXCL8:7025, CCR1:7029, CXCL11:7045, CXCL10:7450, CXCR4:7867, CXCL13:8032, CXCR6:8373, ACKR3:9158, CCR3:9805, CCL27:9945, CCRL2:10356, CCR6:10604, CCL28:12076, CXCL…	0.0405452	0.0985538	0.24471	0.397574
REACTOME_CYTOPROTECTION_BY_HMOX1	-0.0407655	76	FABP1:41, RXRA:133, HMOX2:169, ABCC1:310, PRKCD:329, COX6B1:448, ALB:567, PSMD10:635, TXNIP:879, COX5B:1319, PSMB1:1448, COX5A:1715, HMOX1:1873, COX4I1:2232, NCOR1:2237, COX18:2403, CARM1:2605, PSME3:2717, NLRP3:2775, SIN3B:2923, PSMD5:2924, PSME1:3319, NCOA2:3412, SURF1:3425, BACH1:3458, PSME4:3460, BLVRA:3570, COX16:3653, CREBBP:3920, PSMB5:4000, PSMB6:4066, TGS1:4363, PSMB8:4641, HELZ2:4731, P…	0.220451	0.239039	0.24473	0.397574
REACTOME_TRANSFERRIN_ENDOCYTOSIS_AND_RECYCLING	-0.0715377	25	ATP6V1C2:293, ATP6V0A4:568, STEAP3:752, TFRC:1048, ATP6AP1:1430, ATP6V1B1:2097, ATP6V0B:2476, ATP6V0A1:2781, ATP6V1E2:3087, ATP6V0A2:3101, ATP6V1A:3715, STEAP2:3833, HFE:3849, ATP6V0C:4583, ATP6V1B2:4905, ATP6V0D1:6933, ATP6V1F:8826, MCOLN1:9410, ATP6V0D2:9495, ATP6V1G3:10200, TFR2:10754, ATP6V1C1:11449, ATP6V1H:12650, TCIRG1:13529, ATP6V1E1:13877	0.216045	0.236874	0.24618	0.398512
REACTOME_SIGNALING_BY_MET	0.0453606	59	SOS1:68, COL11A2:264, ITGA3:792, LAMA4:890, DOCK7:1016, LAMB2:1195, COL5A2:1439, LAMA2:1986, LAMA5:2129, GAB1:2432, LRIG1:2661, CBL:2732, COL1A1:3242, COL27A1:3439, LAMC2:3456, SH3KBP1:3789, SHC1:3918, TNS3:3975, FN1:4253, SH3GL3:4309, LAMC3:4939, MET:4975, STAM2:4983, GGA3:5167, HGF:5424, COL2A1:5555, COL11A1:5607, COL5A3:6045, PTK2:6060, COL1A2:6383, SRC:6424, PTPRJ:7166, ITGA2:7305, RANBP9:732…	0.229143	0.241947	0.247	0.398512
REACTOME_DOPAMINE_NEUROTRANSMITTER_RELEASE_CYCLE	0.0953885	12	SYT1:462, APBA1:729, SYN1:1249, SYN3:1342, RIMS1:3639, PPFIA2:5337, SLC18A2:5364, TSPOAP1:6139, PPFIA3:9599, PPFIA4:10116, SYN2:12218, UNC13B:12912	0.252724	0.254884	0.2479	0.398512
REACTOME_TRANSCRIPTIONAL_REGULATION_BY_THE_AP_2_TFAP2_FAMILY_OF_TRANSCRIPTION_FACTORS	0.0663868	28	CITED2:419, EP300:887, KIT:982, TFAP2C:2476, ATAD2:2544, PITX2:2655, CGA:3490, MYBL2:3696, KDM5B:4142, TGFA:4214, NPM1:4308, NOP2:4326, EGFR:5182, MYC:5500, KCTD15:5690, ERBB2:5718, DEK:6364, HSPD1:6412, WWOX:6986, ESR1:8197, TFAP2E:8203, CDKN1A:9492, VEGFA:9951, CREBBP:9993, APOE:11821, CGB5:12707, CITED4:12970, KCTD1:13766	0.224462	0.239491	0.24799	0.398512
REACTOME_TP53_REGULATES_TRANSCRIPTION_OF_GENES_INVOLVED_IN_CYTOCHROME_C_RELEASE	-0.0881409	15	STEAP3:752, PPP1R13B:1545, BAX:3370, BNIP3L:3765, CREBBP:3920, ATM:4106, TP53:4393, AIFM2:4773, PRELID3A:4948, TP53INP1:5051, TP53BP2:8348, TP63:8936, BID:9573, ZNF420:9840, TP73:10087	0.237449	0.248213	0.24832	0.398512
REACTOME_RHO_GTPASES_ACTIVATE_CIT	0.0923974	13	DLG4:409, CIT:1504, RHOC:1638, PRC1:2077, MYH14:2277, MYH9:3500, MYH10:4182, PPP1R12A:5620, MYL6:8500, PPP1R12B:10200, KIF14:10404, CDKN1B:11152, MYH11:13876	0.248885	0.254245	0.24885	0.398512
REACTOME_HATS_ACETYLATE_HISTONES	0.0655543	59	SAP130:10, TADA1:238, ING3:297, KAT2A:626, EP300:887, TAF10:1062, JADE1:1104, SUPT20H:1631, BRPF3:1840, ELP4:2248, BRPF1:2267, KAT6B:2344, MSL1:2559, RBBP7:2894, ELP1:3014, TADA2A:3263, EP400:3317, KANSL1:3692, TAF9:3730, SUPT7L:3883, TADA2B:4065, ELP3:4362, ELP2:4444, JADE2:4735, MBIP:4752, KAT6A:5010, KAT8:5052, TAF5L:5331, KAT14:5442, ELP6:5625, BRD8:5738, NCOA1:6011, ATXN7:6066, HCFC1:6177, J…	0.0822236	0.148321	0.24894	0.398512
REACTOME_FORMATION_OF_RNA_POL_II_ELONGATION_COMPLEX	0.0834815	37	MLLT3:114, GTF2F1:173, CCNT2:343, EAF1:476, IWS1:532, NELFE:644, POLR2F:1548, CDK7:1703, ERCC3:2188, PAF1:2253, GTF2H4:2265, TCEA1:2514, CCNT1:2790, SUPT5H:3595, NCBP1:3785, NELFB:3978, LEO1:4085, NELFCD:4291, GTF2H1:5409, ELL:5778, ELOA:6303, CTDP1:6581, SUPT16H:7406, MLLT1:8033, SUPT6H:8326, SSRP1:8439, CTR9:9172, MNAT1:10031, CCNK:10527, RTF1:10774, GTF2H3:10860, AFF4:11121, NELFA:11217, EAF2:…	0.0792582	0.146982	0.24978	0.398512
REACTOME_PEPTIDE_LIGAND_BINDING_RECEPTORS	0.0501106	147	CCKBR:93, PF4:128, GPR37:134, CXCL6:166, HCRTR2:217, RXFP3:312, TACR2:457, NPY2R:477, CCR2:557, GAL:558, PROK1:588, CXCR5:617, F2RL1:745, CCR4:758, PROK2:782, UTS2:926, CCL1:1037, CCR10:1050, QRFPR:1075, OPRM1:1088, BDKRB1:1118, OPRK1:1244, MC4R:1305, PSAP:1617, PRLH:1659, ACKR4:1714, ACKR1:1897, NPS:1962, XCR1:2153, CCKAR:2299, CCR9:2313, NPY4R:2502.5, NTS:2571, NMB:2590, CCL20:2744, ECE2:3047, …	0.0370082	0.0938244	0.24985	0.398512
REACTOME_SIGNALING_BY_VEGF	0.0438515	83	MAPK13:512, VEGFD:518, HSPB1:559, MAPKAPK3:648, NCK2:788, DOCK1:1213, SH2D2A:1215, PRKACA:1458, AKT1:1545, WASF1:1633, BCAR1:1726, ITGB3:1814, VEGFB:1990, PAK2:2085, NCF2:2192, ROCK1:2463, PTK2B:2569, JUP:2860, TRIB3:2886, ITPR2:3244, ITPR3:3267, MAPKAPK2:3274, PRKCA:3376, ABI2:3391, MAPKAP1:3965, PRKACB:4160, FLT4:4306, NCF1:4521, VAV1:4613, WASF2:4728, ELMO2:4743, AXL:5017, WASF3:5029, MTOR:529…	0.168555	0.204824	0.25283	0.399654
KEGG_BLADDER_CANCER	0.0688046	35	MMP2:303, CCND1:313, VEGFD:518, DAPK2:896, RASSF1:1073, RPS6KA5:1493, VEGFB:1990, MDM2:2203, CDKN2A:2404, EGF:3209, MAPK3:3331, RB1:3919, E2F1:4104, EGFR:5182, MYC:5500, ERBB2:5718, BRAF:5861, CDH1:6137, CXCL8:7025, THBS1:7550, FGFR3:7586, RAF1:8339, E2F3:8364, MAP2K2:8447, ARAF:8767, PGF:8771, VEGFC:9310, CDKN1A:9492, TP53:9520, VEGFA:9951, E2F2:10520, CDK4:10605, DAPK3:11632, DAPK1:11722, MMP9:…	0.159429	0.199523	0.25358	0.399654
REACTOME_WNT_LIGAND_BIOGENESIS_AND_TRAFFICKING	0.0877994	20	WNT9B:934, WNT2B:938, WNT9A:1615, WLS:2357, VPS29:3042, WNT2:3101, WNT3A:3172, WNT5B:3264, WNT11:3423, WNT5A:4995, WNT8A:5678, WNT10B:5688, VPS35:6475, TMED5:7872, WNT16:9988, WNT10A:10302, PORCN:10378, WNT1:10955, WNT8B:11187, WNT6:12243	0.174321	0.209241	0.2542	0.399654
REACTOME_EFFECTS_OF_PIP2_HYDROLYSIS	-0.0641759	26	PRKCD:329, PRKCQ:1064, ABHD12:1167, DGKQ:2336, ABHD6:2385, DGKE:2614, RASGRP1:2671, DGKA:2831, MGLL:3227, DGKD:3465, RASGRP2:3659, DGKH:4289, DGKG:4389, PRKCH:4685, DAGLB:4732, DGKB:6610, ITPR1:6832, PRKCE:8261, DGKI:9072, TRPC3:9325, ITPR3:10646, ITPR2:10669, DGKZ:11272, TRPC7:11426, DAGLA:12162, TRPC6:13660	0.257754	0.257828	0.25471	0.399654
REACTOME_CHOLESTEROL_BIOSYNTHESIS	-0.109065	24	HMGCS1:1479, PLPP6:1619, LBR:2311, IDI1:2515, SQLE:2589, ARV1:2606, HMGCR:2804, DHCR24:2986, SC5D:3411, MVD:3421, FDPS:4310, LSS:4955, MSMO1:5010, NSDHL:5118, HSD17B7:6075, PMVK:6723, FDFT1:6837, MVK:7161, DHCR7:7511, CYP51A1:8317, ACAT2:8794, TM7SF2:8922, GGPS1:9356, EBP:11583	0.0645893	0.129923	0.25572	0.399654
REACTOME_NEUROTRANSMITTER_RELEASE_CYCLE	-0.0717736	39	SLC1A1:6, GLS2:10, SLC6A12:353, SLC22A2:385, SLC22A1:607, MAOA:673, UNC13B:1001, SLC5A7:1138, GAD1:1450, SYN2:1695, SLC18A3:1707, ALDH5A1:1789, SLC6A11:2093, SLC6A1:2742, SLC32A1:3027, SLC1A2:3201, SLC1A6:3403, GAD2:3600, PPFIA4:3797, PPFIA3:4314, ABAT:4442, SLC17A7:5442, CHAT:5720, TSPOAP1:7774, SLC18A2:8549, PPFIA2:8576, ARL6IP5:9087, SLC38A2:9280, SLC6A13:9926, RIMS1:10274, SLC1A7:11069, NAAA:…	0.121398	0.17638	0.25604	0.399654
REACTOME_REGULATION_OF_FZD_BY_UBIQUITINATION	0.0995033	16	RSPO1:233, RSPO3:1588, RSPO4:1741, ZNRF3:2322, LRP6:2803, WNT3A:3172, LGR5:4549, LGR4:5986, FZD6:6313, LRP5:6323, RNF43:6579, RSPO2:8693, USP8:9434, FZD5:9613, FZD4:10219, LGR6:12055	0.168408	0.204824	0.25641	0.399654
REACTOME_G_ALPHA_12_13_SIGNALLING_EVENTS	0.048302	58	SOS1:68, TIAM2:190, ARHGEF12:209, FGD1:630, GNA12:1272, ARHGEF2:1373, BTK:1380, ARHGEF40:1613, RHOC:1638, RASGRF2:1752, ROCK1:2463, KALRN:2608, PLXNB1:2849, PLEKHG5:2940, ARHGEF38:3180, ARHGEF10L:3503, GNB3:3638, ARHGEF3:3994, ARHGEF11:4013, ARHGEF37:4079, GNA13:4170, FGD2:4417, VAV1:4613, TIAM1:4647, AKAP13:5001, SOS2:5992, ITSN1:6634, ARHGEF1:6790, FGD4:6844, ARHGEF10:6889, ARHGEF9:6906, ARHGEF…	0.204182	0.229968	0.25682	0.399654
REACTOME_TRNA_PROCESSING_IN_THE_NUCLEUS	0.0706471	51	RPP25:211, NUP153:494, NUP54:598, NUP155:669, ZBTB8OS:767, RTRAF:1041, NUP58:1124, CLP1:1214, POP4:1958, SEC13:2080, RPP38:2181, NUP160:2244, POP7:2306, NUP88:2429, NUP210:3152, RPP40:3184, RPP30:3219, RAE1:3535, DDX1:3554, NUP37:3561, NUP50:3627, CSTF2:3792, NUP214:3850, NUP188:3885, TPR:4025, NUP107:4564, CPSF1:6270, NUP205:6327, NUP35:7250, TRNT1:7524, NUP93:7660, RPP21:7817, POP5:8095, C2orf4…	0.0814746	0.148321	0.25777	0.399654
REACTOME_TNF_RECEPTOR_SUPERFAMILY_TNFSF_MEMBERS_MEDIATING_NON_CANONICAL_NF_KB_PATHWAY	0.112552	16	MAP3K14:31, LTBR:948, TNFSF14:2189, BIRC3:2485, LTB:2817, TNFSF13B:2929, TNFSF11:3407, TNFRSF12A:5221, TRAF3:5397, BIRC2:5672, CD40:6416, TNFSF12:9187, TNFRSF11A:9242, CD40LG:9887, TRAF2:10190, LTA:12469	0.119244	0.17638	0.25838	0.399654
KEGG_ETHER_LIPID_METABOLISM	-0.0649658	27	PLA2G1B:207, PLA2G12A:253, PLD2:992, PAFAH2:998, AGPS:1052, LPCAT2:1198, PLA2G2D:1623, PLA2G4A:2565, LPCAT1:2596, PAFAH1B3:2777, PLA2G4E:3480, PLA2G2E:3918, CHPT1:4705, PLA2G3:5401, PLPP3:6150, ENPP2:7089, PLA2G7:7227, PLA2G5:7329, PLA2G2F:9021, PLA2G12B:9217, PLD1:9826, PLPP2:10038, PLPP1:11195, PLA2G6:11928, PLA2G2C:11999, ENPP6:13348, LPCAT4:13453	0.24305	0.249954	0.25847	0.399654
REACTOME_SARS_COV_INFECTIONS	-0.0410504	114	ATP1A1:81, FXYD1:92, COMT:176, ST6GAL1:216, GSK3B:431, TMPRSS2:471, MGAT2:485, MAN2A1:710, AP2A1:799, PARP9:877, SIGMAR1:967, CHMP3:1309, MGAT4C:1395, IMPDH2:1449, CHMP6:1463, TLR9:1500, IFNAR2:1540, TBK1:1580, FUT8:1583, IFNAR1:1903, JAK3:1965, BRD4:1970, ITGB1:1984, HSP90AA1:2108, CHMP4A:2233, TYK2:2271, UVRAG:2307, SAP30:2422, ITGA4:2439, MTA3:2580, GANAB:2746, PARP14:2842, ATP1B3:3391, TLR7:3…	0.131635	0.182157	0.25899	0.399654
REACTOME_AGGREPHAGY	-0.0598663	20	DYNC1I1:106, DYNC1H1:1344, HSP90AA1:2108, HDAC6:2552, DYNC1I2:3602, IFT88:4252, DYNC1LI1:4399, TUBAL3:4789, VIM:5117, PCNT:5162, DYNC1LI2:6197, ARL13B:6737, HSF1:7267, UBE2N:7483, UBE2V1:7639, CETN1:7936, PRKN:9386, CFTR:9922, PARK7:11290, TUBB1:11867	0.35431	0.299127	0.25922	0.399654
REACTOME_SIGNALING_BY_ROBO_RECEPTORS	0.0381844	99	USP33:39, SOS1:68, ROBO3:205, RPL9:227, RPL36A:266, SRGAP1:276, FLRT3:570, ROBO1:703, PSMF1:738, NCK2:788, PSMD1:1008, PSMD13:1267, DAG1:1297, PRKACA:1458, LHX9:1637, PAK2:2085, SLIT3:2086, UPF2:2269, PSMD4:2289, CAP2:2409, GSPT2:2486, PSMD9:2633, GSPT1:2686, RPS27L:3356, PRKCA:3376, SRGAP3:3413, ZSWIM8:3604, NCBP1:3785, PSMA8:3829, SRGAP2:3847, PSMB4:3880, SLIT2:3887, PSMD2:3993, NELL2:4042, ROB…	0.190835	0.222433	0.25958	0.399654
REACTOME_CELLULAR_SENESCENCE	0.0539547	99	H1-2:44, PHC1:62, CDKN2B:241, JUN:289, PHC3:317, ID1:377, TNIK:561, MAPKAPK3:648, EZH2:657, PHC2:1339, RPS6KA2:1508, H1-4:1540, RAD50:1608, ANAPC7:1621, CCNE2:2146, MDM2:2203, EHMT2:2237, CBX2:2343, CDKN2A:2404, MAPK9:2446, MDM4:2509, MRE11:2767, RBBP7:2894, UBE2S:3026, MAP2K7:3060, CDKN2D:3161, MAPKAPK2:3274, EP400:3317, MAPK3:3331, MOV10:3363, TNRC6C:3368, SCMH1:3445, IL6:3479, AGO1:3769, TERF2…	0.0645493	0.129923	0.25962	0.399654
REACTOME_GENE_AND_PROTEIN_EXPRESSION_BY_JAK_STAT_SIGNALING_AFTER_INTERLEUKIN_12_STIMULATION	0.0656348	24	STAT4:481, MSN:765, CAPZA1:918, CNN2:1294, LCP1:1839, PAK2:2085, PDCD4:4411, IL10:4554, PITPNA:4870, HNRNPDL:5033, TALDO1:5228, LMNB1:6111, SERPINB2:6714, AIP:7024, BOLA2B:7433, ANXA2:8041, PSME2:8228, TCP1:8250, SOD2:8482, IFNG:8547, SOD1:9773, MTAP:11063, GSTO1:13566, MIF:13830	0.266065	0.260403	0.25994	0.399654
REACTOME_MTOR_SIGNALLING	0.0615647	26	RPTOR:865, CAB39L:1509, AKT1:1545, RRAGD:1605, STRADB:2014, TSC1:2059, AKT1S1:2400, STRADA:3035, PRKAA2:3846, SLC38A9:3996, EIF4EBP1:4438, MTOR:5297, PRKAA1:5551, PRKAG2:5912, TSC2:6422, EIF4E:7427, STK11:7644, EIF4G1:8944, PPM1A:9421, LAMTOR2:10396, PRKAG1:10603, AKT2:10830, EEF2K:11244, EIF4B:11463, PRKAB1:11903, PRKAB2:12163	0.277626	0.267102	0.26015	0.399654
REACTOME_DEPOSITION_OF_NEW_CENPA_CONTAINING_NUCLEOSOMES_AT_THE_CENTROMERE	0.115644	24	CENPH:386, OIP5:1228, CENPS:1756, CENPL:2413, CENPU:2631, RBBP7:2894, RSF1:3225, MIS18A:3415, CENPO:3762, SMARCA5:4128, CENPP:4178, NPM1:4308, CENPW:5293, CENPM:5388, ITGB3BP:5430, CENPQ:5616, CENPC:6018, CENPT:6312, CENPI:8244, CENPK:8674, CENPN:9938, MIS18BP1:10282, CENPX:12743, HJURP:13647	0.0500467	0.108047	0.26026	0.399654
REACTOME_RHO_GTPASES_ACTIVATE_ROCKS	0.0800067	13	LIMK2:981, RHOC:1638, MYH14:2277, ROCK1:2463, MYH9:3500, MYH10:4182, PPP1R12A:5620, LIMK1:6694, ROCK2:7392, MYL6:8500, PPP1R12B:10200, PAK1:10425, MYH11:13876	0.318068	0.282676	0.2605	0.399654
REACTOME_PEPTIDE_HORMONE_METABOLISM	0.0384964	74	SLC30A8:102, EXOC5:213, PAX6:482, CDX2:757, MYRIP:922, BCHE:974, IGF1:975, AOPEP:1268, CRHR2:1365, GNAT3:1557, KIF5C:1586, GCG:1711, TSHB:1774, INHA:1804, GH1:1995, GATA4:2210, INHBB:2278, EXOC1:2284, ACE2:2784, CPA3:3228, ACHE:3374, SLC30A6:3382, REN:3476, CGA:3490, GNB3:3638, INHBA:3685, UCN:3772, GIP:4472, LEP:4484, PCSK1:4532, KLF4:5312, EXOC4:5328, SEC11A:5474, CTSD:5632, INHBE:5773, CPE:627…	0.25348	0.255204	0.26069	0.399654
REACTOME_SIGNALING_BY_PDGFR_IN_DISEASE	0.0811561	13	SOS1:68, STAT1:977, KANK1:1579, STRN:2533, PDGFRA:3316, FIP1L1:4644, PIK3CB:6664, ETV6:7543, PIK3R1:8583, KDR:9074, GOLGA4:9900, PIK3R2:10257, BIN2:12445	0.311166	0.279669	0.26159	0.400257
REACTOME_PYRUVATE_METABOLISM	-0.0710004	27	RXRA:133, PDPR:206, GSTZ1:667, ME1:966, PPARD:1850, DLD:1875, PDP2:1877, PDP1:3092, LDHA:3461, PDK2:3484, GLO1:4406, MPC1:4754, SLC16A3:5356, HAGH:5766, PDHA2:5890, PDK1:6077, BSG:7286, DLAT:7356, PDHX:8401, PDHB:8578, MPC2:8668, PDK4:9446, SLC16A8:9772, LDHC:10238, LDHB:11929, PDK3:12690, PDHA1:12821	0.202014	0.229501	0.26305	0.401703
REACTOME_NOREPINEPHRINE_NEUROTRANSMITTER_RELEASE_CYCLE	-0.101674	11	SLC22A2:385, SLC22A1:607, MAOA:673, UNC13B:1001, PPFIA4:3797, PPFIA3:4314, TSPOAP1:7774, SLC18A2:8549, PPFIA2:8576, RIMS1:10274, SYT1:13451	0.243092	0.249954	0.26436	0.401703
REACTOME_MITOCHONDRIAL_BIOGENESIS	-0.0449956	69	GLUD1:57, RXRA:133, SSBP1:765, ATP5F1D:883, SIRT5:972, ATP5PB:1472, PRKAB2:1750, ATP5MF:1876, IMMT:2008, PRKAB1:2010, MAPK12:2126, APOO:2153, NCOR1:2237, CARM1:2605, ATP5F1A:2700, CRTC1:3115, MTERF1:3130, TFB2M:3213, PRKAG1:3310, NCOA2:3412, TFAM:3512, CREBBP:3920, ATP5MC1:4031, TFB1M:4070, TGS1:4363, NR1D1:4494, TWNK:4518, HELZ2:4731, POLRMT:4747, ATP5MC3:5190, CRTC2:5257, SOD2:5431, ALAS1:5725,…	0.197314	0.225796	0.26438	0.401703
REACTOME_CROSSLINKING_OF_COLLAGEN_FIBRILS	-0.0918318	18	LOX:75, COL4A3:276, COL4A4:1720, PCOLCE:2310, PXDN:2455, COL4A5:2762, TLL1:3655, TLL2:4041, BMP1:4146, LOXL4:5564, LOXL1:6675, LOXL3:7405, COL1A2:7530, LOXL2:9204, COL4A2:9357, COL1A1:10671, COL4A1:10784, COL4A6:10810	0.177629	0.211354	0.26457	0.401703
REACTOME_N_GLYCAN_ANTENNAE_ELONGATION_IN_THE_MEDIAL_TRANS_GOLGI	-0.0940319	23	ST6GAL1:216, MGAT2:485, B4GALT1:513, MAN2A1:710, MGAT4C:1395, FUT8:1583, CHST10:3032, LHB:3469, CHST8:3555, B4GALT4:3961, MGAT4A:4614, ST3GAL4:5225, ST8SIA3:5997, ST8SIA2:6174, B4GALT2:7189, MGAT5:8114, B4GALT5:8185, MGAT3:8253, MGAT4B:9042, MAN2A2:10090, CGA:10423, B4GALT6:12096, B4GALT3:12148	0.118783	0.17638	0.26805	0.406158
KEGG_RENAL_CELL_CARCINOMA	0.044576	52	SOS1:68, JUN:289, VEGFD:518, ARNT2:635, EP300:887, AKT1:1545, EGLN2:1650, VEGFB:1990, PDGFB:2030, PAK2:2085, GAB1:2432, MAPK3:3331, TGFB2:3498, PIK3CG:3585, TGFA:4214, PIK3R5:4215, TGFB1:4293, EPAS1:4670, MET:4975, ARNT:5267, HGF:5424, FLCN:5586, HIF1A:5650, BRAF:5861, SOS2:5992, ETS1:6310, PIK3CB:6664, TGFB3:6715, PAK6:6886, SLC2A1:7454, PIK3CD:7669, RAF1:8339, MAP2K2:8447, PIK3R1:8583, ARAF:876…	0.267031	0.260723	0.26909	0.406158
REACTOME_CLATHRIN_MEDIATED_ENDOCYTOSIS	0.0356898	110	BIN1:157, SYT9:389, SYT1:462, M6PR:480, AAK1:527, AP2M1:647, SCARB2:730, DVL2:773, SYT8:803, RAB5C:1069, IL7R:1441, EPN1:1602, AMPH:1788, UBQLN2:1923, SYNJ2:2333, STON2:2349, FNBP1L:2358, STON1:2402, ARRB2:2566, SYT2:2695, CBL:2732, GRK2:2791, GPS1:2921, PACSIN3:2935, EGF:3209, FCHO2:3360, CTTN:3663, SH3KBP1:3789, COPS7B:3859, CHRM2:3942, CFTR:3991, COPS4:4021, PIP5K1C:4124, TGFA:4214, NECAP1:430…	0.197775	0.225911	0.27005	0.406158
KEGG_CITRATE_CYCLE_TCA_CYCLE	-0.105681	30	ACO1:42, PCK1:401, PC:469, PCK2:569, CS:644, ACO2:780, MDH1:981, OGDHL:997, SDHA:1453, DLD:1875, ACLY:2291, SUCLG1:4184, SUCLA2:4231, FH:4535, SUCLG2:4573, IDH3G:5262, IDH3B:5522, SDHD:5673, PDHA2:5890, DLST:6829, DLAT:7356, SDHB:7651, PDHB:8578, OGDH:9329, IDH1:9532, IDH3A:9830, SDHC:12082, IDH2:12301, PDHA1:12821, MDH2:13611	0.0453518	0.10238	0.27006	0.406158
REACTOME_NUCLEAR_PORE_COMPLEX_NPC_DISASSEMBLY	0.0943825	31	NUP153:494, NUP54:598, NUP155:669, NEK9:959, NUP58:1124, SEC13:2080, NUP160:2244, NUP88:2429, NUP210:3152, RAE1:3535, NUP37:3561, NUP50:3627, NUP214:3850, NUP188:3885, TPR:4025, NUP107:4564, CCNB2:4753, CCNB1:5490, NUP205:6327, NUP35:7250, NUP93:7660, NEK6:8991, NUP43:9054, NUP98:10115, NUP85:10134, SEH1L:10184, AAAS:10347, NUP133:10805, NUP62:12156, NUP42:12387, NDC1:12918	0.0692403	0.135874	0.27055	0.406158
REACTOME_GABA_SYNTHESIS_RELEASE_REUPTAKE_AND_DEGRADATION	-0.0930908	12	SLC6A12:353, GAD1:1450, ALDH5A1:1789, SLC6A11:2093, SLC6A1:2742, SLC32A1:3027, GAD2:3600, ABAT:4442, SLC6A13:9926, RIMS1:10274, DNAJC5:13277, SYT1:13451	0.264333	0.260006	0.27133	0.406158
REACTOME_ANTIMICROBIAL_PEPTIDES	-0.08232	32	BPIFB1:50, PRSS3:51, TLR2:579, BPIFB2:818, ELANE:1101, DEFB129:1106, DEFB136:2074, PGLYRP1:2109, BPIFA1:2950, DEFB130B:3282, CCR6:3309, DEFB130A:4265, CLU:4980, PGLYRP2:5264, SLC11A1:5475, DEFB128:5791, ATOX1:6137, BPIFB4:6225, BPI:6367, DEFB105B:7270, DEFB105A:7561, DEFB119:7574, ATP7A:7684, DEFB135:7863, S100A8:8190, CD4:8833, EPPIN:9091, PGLYRP3:9808, ART1:9992, BPIFB6:10073, RNASE7:11740, CCR…	0.107419	0.169136	0.27145	0.406158
REACTOME_NEGATIVE_REGULATION_OF_TCF_DEPENDENT_SIGNALING_BY_WNT_LIGAND_ANTAGONISTS	0.100527	13	WNT9A:1615, DKK1:1646, LRP6:2803, DKK2:3073, WNT3A:3172, KREMEN1:3657, WNT5A:4995, SOST:5111, LRP5:6323, WIF1:6411, KREMEN2:10947, DKK4:11119, SFRP1:13287	0.209655	0.232664	0.27162	0.406158
REACTOME_ACTIVATION_OF_SMO	0.0865266	17	BOC:1234, PTCH1:1454, EVC:1556, CDON:2474, ARRB2:2566, GRK2:2791, KIF3A:3974, DHH:4206, EVC2:5024, IHH:6548, ARRB1:7129, IQCE:8999, SHH:9782, GAS8:9939, EFCAB7:9971, GAS1:9999, SMO:12681	0.217017	0.237526	0.27281	0.406771
REACTOME_PI_3K_CASCADE_FGFR4	0.0811561	13	KLB:629, FGF6:1648, FGF1:1663, GAB1:2432, FGF19:4437, FGFR4:5100, FRS2:5970, FGF23:7193, FGF17:7610, FGF20:8252, PIK3R1:8583, FGF4:10685, PTPN11:13462	0.311166	0.279669	0.27306	0.406771
REACTOME_DERMATAN_SULFATE_BIOSYNTHESIS	0.0916047	11	DSE:168, CSPG4:1003, DCN:2602, VCAN:3087, BCAN:5525, CSPG5:5949, BGN:6154, DSEL:6931, UST:6979, NCAN:12074, CHST14:13554	0.292941	0.272329	0.27416	0.40764
REACTOME_RHO_GTPASES_ACTIVATE_FORMINS	0.0615681	93	RHOD:72, CENPH:386, DVL2:773, DAAM1:1520, RHOC:1638, CENPS:1756, TUBB1:2046, PPP2R1B:2051, SEC13:2080, MAD2L1:2144, PPP2R5B:2220, NUP160:2244, B9D2:2249, ZW10:2387, CENPL:2413, CENPU:2631, ZWINT:2721, PPP2R5D:2802, NDC80:2889, CKAP5:2928, FMNL3:2946, CDC20:3148, CLIP1:3164, DVL1:3169, NUDC:3173, FMNL2:3485, NUP37:3561, CENPO:3762, SRGAP2:3847, KIF18A:3909, BUB1B:3959, NSL1:4115, KIF2B:4143, CENPP…	0.0408525	0.0985538	0.27688	0.410911
REACTOME_HEME_SIGNALING	-0.0503229	38	RXRA:133, SLC46A1:223, LY96:678, APOB:812, TLR4:1187, HMOX1:1873, NCOR1:2237, SIRT1:2462, CARM1:2605, CRTC1:3115, CLEC1B:3241, NCOA2:3412, BACH1:3458, CREBBP:3920, TGS1:4363, NR1D1:4494, RAI1:4613, HELZ2:4731, CLOCK:5024, CRTC2:5257, RORA:5454, ATF2:5909, ARNTL:6275, PPARA:6420, PPARGC1A:7637, NCOA1:7902, CHD9:8152, MAFK:8472, CRTC3:9964, NFE2L2:10411, APOA1:11032, NRIP1:11527, NCOA6:11634, NPAS2…	0.283694	0.268036	0.27828	0.412213
KEGG_MATURITY_ONSET_DIABETES_OF_THE_YOUNG	0.0673749	23	HNF4A:208, PAX6:482, HNF1A:1204, HNF1B:1239, GCK:1879, PAX4:2303, HNF4G:2953, PDX1:3813, FOXA3:3874, NEUROG3:4986, FOXA2:5478, NR5A2:5734, MNX1:6049, BHLHA15:6203, NEUROD1:6630, NKX2-2:7052, HHEX:9285, ONECUT1:10644, PKLR:11406, MAFA:11425, INS:12756, NKX6-1:12802, SLC2A2:13325	0.263701	0.260006	0.27954	0.412609
REACTOME_IRS_MEDIATED_SIGNALLING	0.0657143	35	SOS1:68, FGF5:526, KLB:629, FGF6:1648, FGF1:1663, GAB2:2197, GAB1:2432, TRIB3:2886, IRS1:3116, FGFR1:3154, FGFR2:3453, KL:4047, FGF10:4145, FGF19:4437, PIK3R4:5045, FGFR4:5100, FLT3:5116, PIK3C3:5391, PDPK1:5706, FRS2:5970, PIK3CB:6664, FGF23:7193, FGFR3:7586, FGF17:7610, FGF20:8252, PIK3R1:8583, FGF22:9642, PIK3R2:10257, PDE3B:10381, FGF4:10685, AKT2:10830, TLR9:12413, FGF7:12911, THEM4:13458, P…	0.179013	0.21258	0.28047	0.412609
KEGG_HEMATOPOIETIC_CELL_LINEAGE	-0.081504	66	CD38:119, CD34:205, CD44:426, CD36:522, ITGA2B:555, CD3D:924, TFRC:1048, ANPEP:1143, CD22:1154, IL4:1284, CD5:1440, GP9:1489, GP1BB:1651, CD19:1683, THPO:1775, GP5:2013, TPO:2389, ITGA4:2439, IL5RA:2459, CD8A:2861, HLA-DRA:2878, ITGAM:3040, CD14:3304, IL1A:3339, IL1R2:3429, CSF1R:3596, IL1R1:3732, FCGR1A:3755, IL5:3824, IL2RA:3851, IL1B:4050, IL9R:4127, CD37:4660, IL4R:4721, IL11RA:5178, EPO:5996…	0.0223487	0.068656	0.28066	0.412609
REACTOME_BINDING_AND_UPTAKE_OF_LIGANDS_BY_SCAVENGER_RECEPTORS	-0.0764538	35	FTH1:39, HPX:381, CD36:522, ALB:567, APOB:812, HSP90B1:938, MSR1:1104, APOE:2092, HSP90AA1:2108, LRP1:2151, COLEC11:2451, SCARB1:2471, COLEC12:3042, SCARA5:3135, SCARF1:3533, HP:4110, MARCO:4665, AMBP:5104, MASP1:5152, COL3A1:5172, JCHAIN:5469, STAB1:6491, COL1A2:7530, SSC5D:8250, COL4A2:9357, CD163:9822, SCGB3A2:9909, COL1A1:10671, COL4A1:10784, APOA1:11032, HYOU1:11551, CALR:12091, SPARC:12728,…	0.117956	0.17638	0.28089	0.412609
REACTOME_REGULATION_OF_INSULIN_LIKE_GROWTH_FACTOR_IGF_TRANSPORT_AND_UPTAKE_BY_INSULIN_LIKE_GROWTH_FACTOR_BINDING_PROTEINS_IGFBPS	-0.0417103	102	AMBN:354, SCG3:466, GPC3:508, ALB:567, GOLM1:636, IGFBP2:790, APOB:812, BPIFB2:818, HSP90B1:938, ADAM10:1042, FGG:1060, PAPPA:1172, CKAP4:1211, PLG:1237, SERPIND1:1795, ENAM:1847, SHISA5:1889, MXRA8:1926, PRSS23:1934, APOE:2092, CHRDL1:2106, SPARCL1:2134, MEN1:2176, RCN1:2224, AFP:2317, ITIH2:2414, CDH2:2697, MIA3:2769, APOA5:2801, LGALS1:2918, CP:2955, BMP4:2981, DNAJC3:2992, IGFBP6:3268, VGF:35…	0.147024	0.192092	0.28116	0.412609
REACTOME_GLYOXYLATE_METABOLISM_AND_GLYCINE_DEGRADATION	-0.0995311	31	GNMT:5, GOT2:30, AGXT:61, GRHPR:160, HOGA1:290, PXMP2:876, GLDC:921, ALDH4A1:1033, AGXT2:1103, DAO:1497, DLD:1875, DHTKD1:2390, LIPT1:4873, PRODH2:5796, PDHA2:5890, HAO1:6061, DDO:6159, DLST:6829, BCKDHA:6988, NDUFAB1:7274, DLAT:7356, PDHX:8401, DBT:8542, PDHB:8578, GCSH:9321, OGDH:9329, LIPT2:9673, BCKDHB:10180, AMT:10366, PDHA1:12821, LIAS:13646	0.0553705	0.116342	0.28395	0.414784
REACTOME_ACETYLCHOLINE_BINDING_AND_DOWNSTREAM_EVENTS	0.109976	14	CHRNA3:73, CHRND:1717, CHRNA5:1887, CHRNA9:1893, CHRNA7:3140, CHRNA1:3200, CHRNB4:4620, CHRNA4:5837, CHRNB2:6479, CHRNB3:7330, CHRNA2:8234, CHRNG:9051, CHRNA6:11465, CHRNE:13083	0.154401	0.196755	0.28531	0.414784
REACTOME_MRNA_SPLICING	0.0617568	88	CWC27:76, GTF2F1:173, DHX16:180, SNW1:246, SLU7:435, ZCRB1:501, PAPOLA:585, PRCC:805, AQR:827, HNRNPD:897, CWC22:906, WDR33:917, ISY1:1147, CLP1:1214, SRSF11:1310, POLR2F:1548, HNRNPM:1553, CPSF7:1576, SF3A1:1806, TFIP11:1930, CCAR1:2133, CD2BP2:2391, SF3B2:2518, PQBP1:2789, PPWD1:2831, SRRM1:3224, SRSF4:3396, HNRNPUL1:3411, U2SURP:3592, PRPF4:3644, NCBP1:3785, CSTF2:3792, SNRNP27:3913, CHERP:394…	0.0459341	0.102697	0.28596	0.414784
REACTOME_ONCOGENIC_MAPK_SIGNALING	0.0403373	58	IQGAP1:330, DUSP16:470, TLN1:604, KSR2:686, DUSP7:993, KIAA1549:1191, PAPSS1:1486, FAM114A2:1792, ITGB3:1814, CAMK2B:2103, LMNA:2496, ARRB2:2566, CSK:2891, TRAK1:2949, VCL:2993, CNKSR2:3221, PEBP1:3234, MAPK3:3331, ESRP1:3532, AGK:4001, SHOC2:4148, FN1:4253, CAMK2A:4284, FGB:4905, SPRED3:5079, KSR1:5497, CNKSR1:5646, BRAF:5861, SND1:5957, SRC:6424, ARRB1:7129, TRIM24:7139, AP3B1:7696, JAK2:7897, …	0.288982	0.270569	0.2861	0.414784
REACTOME_IMMUNOREGULATORY_INTERACTIONS_BETWEEN_A_LYMPHOID_AND_A_NON_LYMPHOID_CELL	-0.0758944	59	ICAM2:58, CD34:205, ITGAL:896, CD3D:924, NPDC1:947, ICAM1:1139, CD22:1154, VCAM1:1333, CD19:1683, ICAM4:1843, ITGB1:1984, B2M:2077, NCR1:2220, ITGA4:2439, SLAMF6:2509, CD300LB:2815, CD8A:2861, COLEC12:3042, SELL:3637, FCGR1A:3755, TREM1:3860, CD40LG:4026, CD81:4561, KLRG1:4642, NECTIN2:4701, TREML2:4823, TYROBP:4927, TREM2:4992, COL3A1:5172, FCGR2B:5596, CLEC4G:5712, SIGLEC1:5790, FCGR3A:6117, IC…	0.0442139	0.101307	0.28622	0.414784
REACTOME_STIMULI_SENSING_CHANNELS	-0.0509479	94	CLCNKB:32, TRPM6:35, ANO6:80, CLCNKA:87, TRPA1:102, ASIC5:158, BSND:208, TRPM2:231, SCNN1B:277, CLCA1:288, TRPV5:456, TRPV6:663, CLCN2:824, CLCN6:863, ANO1:900, WNK4:941, SCNN1G:954, CLCN5:1070, ANO9:1097, TRPM7:1370, ANO5:1388, TRPV4:1533, TRPV1:1705, ASIC1:2186, TRPV3:2479, TRPM4:2640, STOM:2803, BEST4:3322, SGK2:3399, SLC9B1:3625, WNK1:3814, SCNN1A:3826, MCOLN3:3868, SLC9C1:4407, CLCA2:4774, T…	0.0888984	0.153857	0.28704	0.414784
REACTOME_UB_SPECIFIC_PROCESSING_PROTEASES	0.0442994	122	USP33:39, SMAD7:218, TRAF6:240, RIPK1:369, KAT2A:626, PSMF1:738, USP28:833, ADRM1:979, PSMD1:1008, TAF10:1062, USP4:1136, CDC25A:1217, PSMD13:1267, FKBP8:1447, USP20:1626, USP13:1634, USP47:1691, SKP2:1869, VDAC2:1903, MDM2:2203, PSMD4:2289, BIRC3:2485, MDM4:2509, ARRB2:2566, USP19:2624, PSMD9:2633, AXIN2:2962, CDC20:3148, USP2:3447, PSMA8:3829, USP16:3845, PSMB4:3880, TAB1:3932, USP49:3938, CFTR…	0.0925093	0.156233	0.28717	0.414784
KEGG_BASAL_CELL_CARCINOMA	0.0590511	48	DVL2:773, SUFU:815, WNT9B:934, WNT2B:938, FZD1:1059, FZD7:1138, PTCH1:1454, WNT9A:1615, GLI2:1666, FZD10:1815, APC:2213, TCF7L1:2264, AXIN2:2962, WNT2:3101, DVL1:3169, WNT3A:3172, WNT5B:3264, WNT11:3423, APC2:4652, WNT5A:4995, FZD9:5049, GLI3:5334, WNT8A:5678, WNT10B:5688, FZD6:6313, DVL3:6407, HHIP:6521, LEF1:6554, TCF7:6810, STK36:6890, PTCH2:8216, BMP2:9033, TP53:9520, FZD5:9613, SHH:9782, WNT…	0.157653	0.1979	0.28722	0.414784
REACTOME_HYALURONAN_METABOLISM	0.0799155	16	ABCC5:291, STAB2:1168, HMMR:1481, SLC9A1:2996, HAS1:4422, CEMIP:4660, HYAL1:4890, HYAL2:4893, HAS2:5242, GUSB:6243, HYAL3:6348, HAS3:8630, HEXA:8797, HEXB:9202, LYVE1:13126, CD44:13487	0.26864	0.261662	0.28737	0.414784
REACTOME_TRANSCRIPTIONAL_REGULATION_BY_MECP2	0.0477492	44	FKBP5:529, CRH:915, OPRM1:1088, TBL1X:1148, OPRK1:1244, PRKACA:1458, GPS2:1917, CAMK2B:2103, PTPN4:2250, SLC2A3:2425, MOBP:2488, MOV10:3363, TNRC6C:3368, BDNF:3647, AGO1:3769, MECP2:3794, CAMK2A:4284, TRPC3:4588, TNRC6B:4725, MET:4975, GRIN2B:5186, SGK1:5243, DLL1:5460, CAMK4:6181, SIN3A:7146, TNRC6A:8046, PVALB:8061, AURKB:8140, NOTCH1:8247, NCOR2:8295, PTPN1:9372, IRAK1:9584, RBFOX1:9718, HIPK2…	0.27387	0.264297	0.28819	0.41483
KEGG_ASTHMA	-0.0984204	15	IL4:1284, MS4A2:1424, HLA-DRA:2878, IL13:2917, HLA-DMB:3497, IL5:3824, CD40LG:4026, HLA-DMA:4412, HLA-DOA:5348, IL9:5579, FCER1A:6209, CD40:7497, IL10:9359, FCER1G:10894, TNF:12200	0.187113	0.219725	0.28931	0.41483
REACTOME_BMAL1_CLOCK_NPAS2_ACTIVATES_CIRCADIAN_GENE_EXPRESSION	-0.0547227	24	RXRA:133, NAMPT:498, KLF15:509, DBP:1229, CARM1:2605, NCOA2:3412, CREBBP:3920, F7:4199, TGS1:4363, HELZ2:4731, CLOCK:5024, BHLHE40:6234, ARNTL:6275, PPARA:6420, SERPINE1:6842, NOCT:7164, BHLHE41:7448, NCOA1:7902, CHD9:8152, ARNTL2:8667, NCOA6:11634, NPAS2:11841, TBL1X:12765, MED1:13045	0.353789	0.299127	0.29048	0.41483
REACTOME_SIGNALING_BY_ERBB4	0.0604599	42	SOS1:68, DLG4:409, STAT5A:471, GABRB1:683, SPARC:1185, YAP1:1750, GABRB3:2204, ADAM17:2597, ERBB3:2824, EGF:3209, NRG1:3359, GFAP:3908, SHC1:3918, ERBB4:4029, MXD4:4772, GABRG3:4883, BTC:5061, EGFR:5182, EREG:6088, GABRQ:6144, NEDD4:6304, SRC:6424, ITCH:6516, WWOX:6986, WWP1:7625, NRG2:7642, PSEN1:7723, APH1B:7770, NRG3:7863, ESR1:8197, GABRA1:8279, GABRG2:8546, PIK3R1:8583, NCSTN:9016, TAB2:9060…	0.175807	0.209981	0.29058	0.41483
REACTOME_CARGO_RECOGNITION_FOR_CLATHRIN_MEDIATED_ENDOCYTOSIS	0.0352647	82	SYT9:389, SYT1:462, M6PR:480, AAK1:527, AP2M1:647, SCARB2:730, DVL2:773, SYT8:803, IL7R:1441, EPN1:1602, UBQLN2:1923, STON2:2349, STON1:2402, ARRB2:2566, SYT2:2695, CBL:2732, GRK2:2791, GPS1:2921, EGF:3209, FCHO2:3360, SH3KBP1:3789, COPS7B:3859, CHRM2:3942, CFTR:3991, COPS4:4021, TGFA:4214, NECAP1:4303, SH3GL3:4309, CD3G:4680, REPS2:4715, AGTR1:4726, EPN2:4771, SNAP91:4911, STAM2:4983, WNT5A:4995…	0.271058	0.262745	0.29075	0.41483
REACTOME_MEIOTIC_SYNAPSIS	-0.068921	26	REC8:84, SYCP2:958, SYCP1:1732, TERF2:2130, SMC1B:2647, RAD21:3614, FKBP6:3809, DIDO1:4069, SYCE3:4238, BRCA1:4849, POT1:5252, ACD:5267, SUN1:5272, SUN2:5340, SYCE2:6054, TINF2:6071, STAG3:6274, SYNE2:6405, TEX12:6780, LMNB1:7802, TERF1:8352, STAG2:9612, TERF2IP:10086, ATR:10756, LMNA:11417, SYNE1:12703	0.224216	0.239491	0.291	0.41483
REACTOME_REGULATION_OF_PTEN_STABILITY_AND_ACTIVITY	0.0517089	41	PSMF1:738, PSMD1:1008, PSMD13:1267, AKT1:1545, USP13:1634, FRK:1676, OTUD3:1881, XIAP:2084, TRIM27:2118, PSMD4:2289, PSMD9:2633, PSMA8:3829, PSMB4:3880, PSMD2:3993, PSMD3:4343, PSMB11:4403, PSMB9:4409, PSMB10:5084, PSMB2:5295, RNF146:5784, PSMD8:5898, NEDD4:6304, TNKS:6442, PSMD12:7927, PSME2:8228, STUB1:8489, TNKS2:8490, PSMD6:8496, PSMB7:8709, PSMB8:9272, PSMB6:9847, PSMB5:9913, PSME4:10453, PS…	0.25261	0.254884	0.29108	0.41483
REACTOME_TRNA_PROCESSING	0.0514256	94	RPP25:211, NUP153:494, NUP54:598, NUP155:669, ZBTB8OS:767, ADAT3:871, CDKAL1:1009, RTRAF:1041, NUP58:1124, CLP1:1214, POP4:1958, SEC13:2080, RPP38:2181, NUP160:2244, OSGEP:2246, POP7:2306, TRMT9B:2394, NUP88:2429, PRORP:2645, TYW5:3056, NUP210:3152, RPP40:3184, RPP30:3219, TRMT13:3355, METTL1:3417, TYW3:3529, RAE1:3535, DDX1:3554, NUP37:3561, NUP50:3627, CSTF2:3792, ALKBH8:3824, NUP214:3850, NUP1…	0.0859448	0.150601	0.29191	0.415263
REACTOME_TRANSPORT_TO_THE_GOLGI_AND_SUBSEQUENT_MODIFICATION	0.0307947	134	TBC1D20:12, PPP6C:127, COG6:143, COPZ2:215, BET1L:239, NSF:311, COPB2:318, USO1:356, SPTBN1:492, COPA:761, CAPZA1:918, TMED10:1137, NAPG:1145, COPZ1:1193, GRIA1:1381, COPB1:1647, B4GALT3:1765, SEC31A:1766, B4GALT6:1817, GBF1:1825, CTSC:1829, TUBB1:2046, SEC13:2080, DCTN3:2160, MANEA:2461, LMAN2:2506, BET1:2680, MGAT1:2745, ANK2:2772, GOSR2:2864, DCTN6:3094, YKT6:3124, SEC22C:3138, ANK3:3201, SEC2…	0.220683	0.239039	0.29436	0.417995
REACTOME_CA_DEPENDENT_EVENTS	0.071763	30	CAMKK2:305, KPNA2:740, NBEA:894, PRKACA:1458, PDE1B:1669, CAMK2B:2103, GRK2:2791, ADCY5:3130, PRKCA:3376, PRKACB:4160, CAMK2A:4284, ADCY2:4685, PRKCG:5085, PRKAR2B:5319, PDE1A:5732, CAMKK1:5801, PDE1C:5944, CAMK4:6181, ADCY1:6742, PRKAR2A:8028, PRKAR1A:8036, ADCY9:9621, ADCY3:9639, ADCY8:10125, ADCY6:10339, PRKAR1B:10388, ADCY4:10567, ADCY7:11154, PLA2G4A:11348, PRKCD:13584	0.174132	0.209241	0.29561	0.418323
REACTOME_ERBB2_REGULATES_CELL_MOTILITY	0.0877625	11	ERBB3:2824, EGF:3209, NRG1:3359, ERBB4:4029, BTC:5061, EGFR:5182, ERBB2:5718, EREG:6088, NRG2:7642, NRG3:7863, HBEGF:13854	0.313656	0.280303	0.29616	0.418323
REACTOME_CYCLIN_A_B1_B2_ASSOCIATED_EVENTS_DURING_G2_M_TRANSITION	0.079967	18	PPME1:1166, CDC25A:1217, CDK7:1703, PPP2R1B:2051, CCNA1:4062, PPP2R2A:4064, PKMYT1:4279, CDC25B:4623, CCNB2:4753, PLK1:5420, CCNB1:5490, WEE1:7361, FOXM1:7783, CCNA2:9413, MNAT1:10031, CDC25C:10240, LCMT1:11366, CCNH:12931	0.240429	0.248654	0.29618	0.418323
REACTOME_GOLGI_TO_ER_RETROGRADE_TRANSPORT	0.0351582	94	COPZ2:215, KIF26B:244, NSF:311, COPB2:318, GALNT1:401, KIF3C:486, KLC3:713, COPA:761, KIF3B:886, CAPZA1:918, KIF15:1098, TMED10:1137, NAPG:1145, COPZ1:1193, COPB1:1647, GBF1:1825, BICD1:1975, PLA2G6:1985, TUBB1:2046, DCTN3:2160, ZW10:2387, KLC4:2961, DCTN6:3094, KIF9:3722, CAPZB:3899, KIF18A:3909, KIF3A:3974, RACGAP1:4078, KIF2B:4143, COPE:4225, KIFC2:4325, KDELR3:4491, COPG2:4540, KIF13B:4957, U…	0.240398	0.248654	0.29719	0.418841
REACTOME_REGULATION_OF_GLUCOKINASE_BY_GLUCOKINASE_REGULATORY_PROTEIN	0.096642	28	NUP153:494, NUP54:598, NUP155:669, NUP58:1124, GCK:1879, SEC13:2080, NUP160:2244, NUP88:2429, NUP210:3152, RAE1:3535, NUP37:3561, NUP50:3627, NUP214:3850, NUP188:3885, TPR:4025, NUP107:4564, NUP205:6327, NUP35:7250, NUP93:7660, NUP43:9054, NUP98:10115, NUP85:10134, SEH1L:10184, AAAS:10347, NUP133:10805, NUP62:12156, NUP42:12387, NDC1:12918	0.0770009	0.143601	0.29775	0.418841
REACTOME_SIGNALING_BY_EGFR_IN_CANCER	0.0685761	16	SOS1:68, GAB1:2432, CBL:2732, EGF:3209, SHC1:3918, TGFA:4214, BTC:5061, EGFR:5182, EREG:6088, PLCG1:6351, CDC37:7209, AREG:7318, PIK3R1:8583, EPGN:10434, HSP90AA1:11805, HBEGF:13854	0.3425	0.293552	0.29863	0.418841
REACTOME_HORMONE_LIGAND_BINDING_RECEPTORS	0.115968	10	TSHB:1774, GPHA2:2710, FSHR:3386, CGA:3490, GNRH1:3492, GNRHR:5258, LHCGR:7342, FSHB:8510, GPHB5:8609, LHB:10444	0.204255	0.229968	0.29892	0.418841
REACTOME_CELL_DEATH_SIGNALLING_VIA_NRAGE_NRIF_AND_NADE	0.0437419	61	SOS1:68, TIAM2:190, ARHGEF12:209, TRAF6:240, FGD1:630, AATF:1276, SQSTM1:1286, ARHGEF2:1373, ARHGEF40:1613, RASGRF2:1752, NGF:1980, KALRN:2608, PLEKHG5:2940, ARHGEF38:3180, ARHGEF10L:3503, ARHGEF3:3994, ARHGEF11:4013, ARHGEF37:4079, GNA13:4170, FGD2:4417, VAV1:4613, TIAM1:4647, AKAP13:5001, ITGB3BP:5430, SOS2:5992, CASP2:6178, ITSN1:6634, ARHGEF1:6790, FGD4:6844, ARHGEF10:6889, ARHGEF9:6906, ARHG…	0.238398	0.248654	0.29928	0.418841
KEGG_ENDOCYTOSIS	-0.0295686	139	ADRB1:121, EHD4:123, EPN3:167, RAB31:256, DAB2:399, PIP5K1B:641, IQSEC3:677, CLTA:695, PARD6B:698, AP2A1:799, GRK6:814, MVB12B:845, VPS4A:850, CBLB:971, PLD2:992, TFRC:1048, ASAP3:1079, EHD1:1102, SMURF1:1141, PARD3:1185, MVB12A:1249, CHMP3:1309, CHMP6:1463, SH3GL1:1605, ACAP3:1634, IL2RB:1821, ASAP2:1879, VPS4B:1939, PSD2:1978, RBSN:2112, ARFGAP3:2144, CHMP4A:2233, ARAP3:2256, SH3GLB2:2366, ARFG…	0.231181	0.24328	0.29973	0.418841
REACTOME_DOWNREGULATION_OF_TGF_BETA_RECEPTOR_SIGNALING	0.0783799	15	SMAD7:218, PPP1CA:1332, PMEPA1:2166, TGFBR2:2415, NEDD4L:3514, TGFB1:4293, USP15:5682, TGFBR1:6261, SMURF2:6504, BAMBI:6597, STRAP:7098, STUB1:8489, ZFYVE9:10659, MTMR4:12319, SMURF1:12772	0.293462	0.272329	0.30388	0.423866
REACTOME_SNRNP_ASSEMBLY	0.0809814	43	SNUPN:26, NUP153:494, NUP54:598, NUP155:669, NUP58:1124, GEMIN5:1377, SEC13:2080, NUP160:2244, NUP88:2429, GEMIN8:2859, GEMIN2:3065, NUP210:3152, RAE1:3535, NUP37:3561, NUP50:3627, NCBP1:3785, NUP214:3850, NUP188:3885, TPR:4025, CLNS1A:4072, NUP107:4564, WDR77:5281, NUP205:6327, GEMIN6:6561, NUP35:7250, DDX20:7351, GEMIN4:7484, NUP93:7660, SMN1:8239, GEMIN7:8913, NUP43:9054, SMN2:9347, TGS1:9550,…	0.0665607	0.131913	0.3044	0.423866
REACTOME_REGULATION_OF_TP53_ACTIVITY	0.0434572	128	TAF4B:255, HIPK1:278, RFC5:606, ZNF385A:856, EP300:887, HUS1:932, TAF10:1062, SMYD2:1101, AKT1:1545, RAD50:1608, TAF2:1820, BRPF3:1840, RMI2:1904, TAF11:1938, PIP4K2C:1950, PPP2R1B:2051, MDM2:2203, EHMT2:2237, BRPF1:2267, CDKN2A:2404, MDM4:2509, ATRIP:2522, TOP3A:2609, MRE11:2767, RAD9B:2822, RBBP7:2894, L3MBTL1:3010, TAF3:3080, PIP4K2A:3143, ATR:3157, KMT5A:3177, USP2:3447, CHEK2:3459, RAD9A:354…	0.0910675	0.155512	0.30611	0.425497
REACTOME_SYNDECAN_INTERACTIONS	0.0680779	25	COL5A2:1439, ITGB4:1555, ITGB3:1814, COL1A1:3242, TNC:3337, PRKCA:3376, SDC2:3473, SDC4:3818, FN1:4253, TGFB1:4293, ITGA6:4854, COL5A3:6045, COL1A2:6383, SDC1:6487, ITGA2:7305, THBS1:7550, COL5A1:7936, ACTN1:7977, ITGAV:8175, ITGB5:8269, COL3A1:8741, TRAPPC4:9667, SDC3:9836, ITGB1:11929, VTN:12729	0.239083	0.248654	0.3073	0.42613
REACTOME_DEGRADATION_OF_DVL	0.052141	33	PSMF1:738, DVL2:773, PSMD1:1008, PSMD13:1267, PSMD4:2289, DACT1:2545, PSMD9:2633, DVL1:3169, PSMA8:3829, PSMB4:3880, PSMD2:3993, PSMD3:4343, PSMB11:4403, PSMB9:4409, PSMB10:5084, PSMB2:5295, PSMD8:5898, KLHL12:6252, DVL3:6407, PSMD12:7927, PSME2:8228, PSMD6:8496, PSMB7:8709, PSMB8:9272, PSMB6:9847, PSMB5:9913, PSME4:10453, PSME1:10594, HECW1:10972, PSMD5:10989, PSME3:11196, PSMB1:12465, PSMD10:13…	0.300458	0.275162	0.30809	0.42613
REACTOME_RIP_MEDIATED_NFKB_ACTIVATION_VIA_ZBP1	0.0931543	13	RIPK1:369, CHUK:925, NFKBIB:2660, NFKBIA:4373, DHX9:5034, NFKB1:5375, RIPK3:5541, TLR3:5549, IKBKB:6478, NKIRAS1:7105, NFKB2:9725, RELA:11111, MYD88:11279	0.245029	0.251533	0.31069	0.42613
KEGG_OXIDATIVE_PHOSPHORYLATION	-0.0670105	92	ATP6V1C2:293, COX6B1:448, NDUFA4L2:491, ATP6V0A4:568, PPA2:708, PPA1:805, ATP5F1D:883, UQCRC2:1204, COX5B:1319, COX6A2:1408, NDUFS5:1421, ATP6AP1:1430, SDHA:1453, ATP5PB:1472, COX5A:1715, ATP5MF:1876, ATP12A:1906, COX7A2:2058, ATP6V1B1:2097, COX4I2:2133, COX4I1:2232, NDUFA6:2253, NDUFB2:2318, NDUFA2:2338, ATP6V0B:2476, ATP5F1A:2700, ATP6V0A1:2781, NDUFV1:2877, NDUFB6:2970, ATP6V1E2:3087, ATP6V0A2…	0.0268333	0.0769767	0.31138	0.42613
REACTOME_SELECTIVE_AUTOPHAGY	-0.0377046	45	DYNC1I1:106, ATG12:1032, DYNC1H1:1344, PRKAB2:1750, PRKAB1:2010, HSP90AA1:2108, HDAC6:2552, TOMM40:2965, PRKAG1:3310, TOMM70:3324, DYNC1I2:3602, PLIN3:3803, ATM:4106, IFT88:4252, DYNC1LI1:4399, MFN2:4601, TUBAL3:4789, MFN1:4870, VIM:5117, PCNT:5162, NBR1:5325, PGAM5:5786, DYNC1LI2:6197, PEX5:6334, USP30:6560, ARL13B:6737, MTERF3:6944, HSF1:7267, PINK1:7442, UBE2N:7483, SRC:7489, UBE2V1:7639, CETN…	0.382266	0.310595	0.31171	0.42613
REACTOME_FRS_MEDIATED_FGFR2_SIGNALING	0.0741029	15	SOS1:68, FGF5:526, FGF6:1648, FGF1:1663, FGFR2:3453, FRS3:3736, FGF10:4145, FRS2:5970, FGF23:7193, FGF17:7610, FGF20:8252, FGF22:9642, FGF4:10685, FGF7:12911, PTPN11:13462	0.320598	0.283682	0.3121	0.42613
KEGG_GLYCOSPHINGOLIPID_BIOSYNTHESIS_LACTO_AND_NEOLACTO_SERIES	-0.0865164	19	B3GALT5:78, B4GALT1:513, ST3GAL6:934, B3GNT2:2155, GCNT2:2421, B4GALT4:3961, FUT7:4872, FUT9:5004, ST3GAL4:5225, B3GNT5:5311, FUT4:6251, ST8SIA1:6852, B4GALT2:7189, B3GALT2:7718, ST3GAL3:8355, B4GAT1:8872, FUT1:8931, B3GNT4:9355, B4GALT3:12148	0.191966	0.223337	0.31269	0.42613
REACTOME_NUCLEAR_ENVELOPE_NE_REASSEMBLY	0.0519284	46	IST1:145, NUP54:598, NUP155:669, NUP58:1124, VRK2:1541, VRK1:1706, TUBB1:2046, SEC13:2080, NUP160:2244, ANKLE2:2418, LMNA:2496, LEMD3:2794, CHMP4C:2958, SIRT2:3131, NUP37:3561, NUP188:3885, PPP2R2A:4064, LEMD2:4187, NUP107:4564, CCNB2:4753, CCNB1:5490, CC2D1B:6038, RANGAP1:6070, LMNB1:6111, NUP205:6327, AHCTF1:6514, RCC1:7187, NUP35:7250, NUP93:7660, EMD:7921, TMPO:8078, CHMP7:8828, NUP43:9054, T…	0.223772	0.239491	0.31299	0.42613
REACTOME_TP53_REGULATES_TRANSCRIPTION_OF_DNA_REPAIR_GENES	0.057357	43	GTF2F1:173, JUN:289, CCNT2:343, NELFE:644, POLR2F:1548, CDK7:1703, MSH2:1754, ERCC3:2188, GTF2H4:2265, TCEA1:2514, CCNT1:2790, MLH1:2879, ATR:3157, SUPT5H:3595, RAD51D:3606, NELFB:3978, NELFCD:4291, PMS2:4902, GTF2H1:5409, DDB2:5665, ELL:5778, ELOA:6303, CTDP1:6581, CDK12:6624, FANCI:6744, SUPT16H:7406, ATF2:8004, SSRP1:8439, FANCD2:8899, BRCA1:9064, CHEK1:9363, TP53:9520, CDK13:9573, ATM:9807, M…	0.1938	0.224225	0.31321	0.42613
REACTOME_GLYCOLYSIS	0.0570545	61	ALDOC:32, PGK1:150, PGAM2:404, NUP153:494, NUP54:598, NUP155:669, GNPDA2:1000, NUP58:1124, PFKFB1:1260, PRKACA:1458, GCK:1879, PPP2R1B:2051, SEC13:2080, NUP160:2244, NUP88:2429, PGP:2594, PPP2R5D:2802, NUP210:3152, PFKFB2:3519, ALDOA:3531, RAE1:3535, NUP37:3561, NUP50:3627, NUP214:3850, NUP188:3885, ENO1:3893, TPR:4025, PRKACB:4160, NUP107:4564, GNPDA1:4950, NUP205:6327, HK3:7019, PFKL:7027, NUP3…	0.124091	0.17638	0.31322	0.42613
REACTOME_BICARBONATE_TRANSPORTERS	-0.0898361	10	SLC4A1:180, SLC4A7:1136, SLC4A4:2198, SLC4A8:3843, SLC4A3:5341, AHCYL2:5918, SLC4A10:6947, SLC4A2:7000, SLC4A9:9594, SLC4A5:13357	0.325387	0.285906	0.31327	0.42613
REACTOME_IRE1ALPHA_ACTIVATES_CHAPERONES	0.0519682	46	SRPRB:178, TLN1:604, WIPI1:797, SRPRA:904, SYVN1:1357, SEC31A:1766, EXTL3:1846, FKBP14:1867, PPP2R5B:2220, WFS1:2345, HYOU1:2362, SSR1:2450, LMNA:2496, DNAJB9:2586, GOSR2:2864, TPP1:3649, TSPYL2:3841, SHC1:3918, PREB:3936, HDGF:4267, KDELR3:4491, ERN1:4537, ARFGAP1:5775, DDX11:6289, EXTL2:6294, PDIA5:6378, ATP6V0D1:6980, DCTN1:7047, YIF1A:7321, PDIA6:7341, KLHDC3:8925, ZBTB17:9432, GSK3A:9897, DN…	0.223418	0.239491	0.3143	0.42613
KEGG_HOMOLOGOUS_RECOMBINATION	0.0863698	25	RAD51C:1146, RAD54L:1501, RAD50:1608, RAD51B:2598, TOP3A:2609, MRE11:2767, POLD2:2855, BLM:3602, RAD51D:3606, MUS81:4006, NBN:4271, XRCC3:4768, POLD3:6287, RAD54B:6518, RAD52:6553, BRCA2:7040, RPA1:7635, XRCC2:8015, RPA3:8049, POLD1:8281, EME1:8934, RPA2:9215, TOP3B:11375, POLD4:11441, SSBP1:13148	0.135278	0.183559	0.31486	0.42613
REACTOME_INTRA_GOLGI_AND_RETROGRADE_GOLGI_TO_ER_TRAFFIC	0.0253845	153	COG6:143, COPZ2:215, BET1L:239, KIF26B:244, NSF:311, COPB2:318, VPS45:375, GALNT1:401, M6PR:480, KIF3C:486, NAA35:513, KLC3:713, COPA:761, KIF3B:886, CAPZA1:918, KIF15:1098, TMED10:1137, NAPG:1145, COPZ1:1193, NAA30:1194, GOLIM4:1598, COPB1:1647, RIC1:1787, GBF1:1825, BICD1:1975, PLA2G6:1985, TUBB1:2046, DCTN3:2160, RGP1:2298, ZW10:2387, VTI1A:2389, ARL1:2615, GOSR2:2864, KLC4:2961, DCTN6:3094, Y…	0.281263	0.268036	0.31532	0.42613
REACTOME_NUCLEAR_IMPORT_OF_REV_PROTEIN	0.087424	29	NUP153:494, NUP54:598, NUP155:669, NUP58:1124, SEC13:2080, NUP160:2244, NUP88:2429, NUP210:3152, RAE1:3535, NUP37:3561, NUP50:3627, NUP214:3850, NUP188:3885, TPR:4025, NPM1:4308, NUP107:4564, NUP205:6327, RCC1:7187, NUP35:7250, NUP93:7660, NUP43:9054, NUP98:10115, NUP85:10134, SEH1L:10184, AAAS:10347, NUP133:10805, NUP62:12156, NUP42:12387, NDC1:12918	0.103545	0.167173	0.31538	0.42613
REACTOME_HS_GAG_BIOSYNTHESIS	-0.0653813	29	HS3ST6:25, GPC6:159, HS3ST4:432, GPC3:508, GPC4:1017, AGRN:1226, HS6ST2:1266, HS3ST1:2200, GPC5:2494, NDST2:2651, GPC1:2754, SDC3:4077, HS6ST3:6116, GPC2:6296, HS2ST1:6931, HS3ST2:7087, NDST4:7191, SDC1:7426, SLC35D2:8477, NDST1:8551, HS6ST1:9048, HSPG2:9060, NDST3:9424, SDC4:10095, SDC2:10440, HS3ST5:10957, GLCE:11037, EXT1:11878, EXT2:12243	0.223433	0.239491	0.31598	0.42613
REACTOME_REGULATION_OF_TP53_ACTIVITY_THROUGH_METHYLATION	0.0977481	15	EP300:887, SMYD2:1101, MDM2:2203, EHMT2:2237, MDM4:2509, L3MBTL1:3010, KMT5A:3177, CHEK2:3459, SETD9:5477, TTC5:9388, TP53:9520, ATM:9807, PRMT5:10019, JMY:11457, EHMT1:11717	0.190143	0.222038	0.31647	0.42613
REACTOME_TRANSMISSION_ACROSS_CHEMICAL_SYNAPSES	0.0435438	191	CHRNA3:73, GABBR1:84, GRIP1:153, LRRC7:247, KCNJ5:269, CAMKK2:305, NSF:311, DLG4:409, NPTN:442, SYT1:462, CACNG4:535, DNAJC5:636, CACNA2D3:642, AP2M1:647, GABRB1:683, DLG3:688, APBA1:729, KPNA2:740, RASGRF1:828, EPB41L1:831, GRIK1:883, NBEA:894, HTR3B:936, BCHE:974, SYN1:1249, GLS:1262, SYN3:1342, GRIA1:1381, PRKACA:1458, RPS6KA2:1508, CAMK1:1535, GNAT3:1557, KCNJ9:1661, CHRND:1717, RASGRF2:1752,…	0.0393757	0.0970103	0.3166	0.42613
REACTOME_INTERLEUKIN_15_SIGNALING	0.0944674	12	SOS1:68, STAT5A:471, GAB2:2197, IL15:2678, SHC1:3918, SOS2:5992, STAT5B:6114, IL2RG:6638, JAK1:7505, IL15RA:9795, JAK3:11948, IL2RB:12092	0.257334	0.257828	0.31706	0.42613
REACTOME_SUMOYLATION_OF_SUMOYLATION_PROTEINS	0.0860852	29	NUP153:494, NUP54:598, NUP155:669, NUP58:1124, SEC13:2080, NUP160:2244, NUP88:2429, NUP210:3152, TOPORS:3188, RAE1:3535, NUP37:3561, NUP50:3627, NUP214:3850, NUP188:3885, TPR:4025, NUP107:4564, NUP205:6327, NUP35:7250, NUP93:7660, PIAS4:8798, NUP43:9054, NUP98:10115, NUP85:10134, SEH1L:10184, AAAS:10347, NUP133:10805, NUP62:12156, NUP42:12387, NDC1:12918	0.10894	0.170297	0.31736	0.42613
REACTOME_FCERI_MEDIATED_NF_KB_ACTIVATION	0.0434991	51	TRAF6:240, BCL10:309, PSMF1:738, CHUK:925, PSMD1:1008, PSMD13:1267, TAB3:1772, CARD11:1830, PSMD4:2289, MALT1:2546, PSMD9:2633, FCER1G:3019, PSMA8:3829, PSMB4:3880, TAB1:3932, PSMD2:3993, PSMD3:4343, NFKBIA:4373, PSMB11:4403, PSMB9:4409, LYN:4625, PSMB10:5084, PSMB2:5295, NFKB1:5375, PDPK1:5706, PSMD8:5898, UBE2V1:6274, UBE2N:6430, IKBKB:6478, FCER1A:7704, PSMD12:7927, PSME2:8228, PSMD6:8496, PSM…	0.283402	0.268036	0.31835	0.426734
KEGG_HEDGEHOG_SIGNALING_PATHWAY	0.054994	41	SUFU:815, WNT9B:934, WNT2B:938, PTCH1:1454, PRKACA:1458, WNT9A:1615, GLI2:1666, CSNK1G2:2712, CSNK1G1:2872, WNT2:3101, WNT3A:3172, WNT5B:3264, WNT11:3423, BMP7:3972, PRKACB:4160, DHH:4206, CSNK1D:4270, BMP5:4367, WNT5A:4995, GLI3:5334, WNT8A:5678, WNT10B:5688, HHIP:6521, IHH:6548, STK36:6890, BMP6:7799, PTCH2:8216, BMP2:9033, SHH:9782, RAB23:9968, WNT16:9988, GAS1:9999, WNT10A:10302, BMP4:10932, …	0.223713	0.239491	0.32055	0.427927
KEGG_GLYCOSYLPHOSPHATIDYLINOSITOL_GPI_ANCHOR_BIOSYNTHESIS	-0.0776038	22	PIGO:286, PIGZ:516, DPM2:537, PIGG:656, PIGP:784, PIGW:1194, PIGF:1528, PIGL:2094, PIGA:3719, PIGX:4304, PIGB:5868, PGAP1:6156, PIGV:6368, PIGN:6573, GPLD1:8760, PIGC:8902, PIGS:9563, PIGH:9991, PIGK:10989, GPAA1:11152, PIGT:13059, PIGM:13247	0.207975	0.231997	0.32162	0.427927
KEGG_BASAL_TRANSCRIPTION_FACTORS	0.0694095	27	GTF2F1:173, TAF4B:255, GTF2A1:798, TAF10:1062, TAF2:1820, TAF11:1938, GTF2E1:2015, GTF2H4:2265, STON1:2402, GTF2E2:2537, TAF9:3730, TAF7:3911, GTF2A1L:4547, TBP:4653, TAF5L:5331, GTF2H1:5409, TAF9B:8434, TBPL2:8545, TAF6:8922, TAF6L:9067, GTF2H3:10860, GTF2IRD1:11440, TAF1:12140, TAF7L:12539, GTF2H2:13357, TAF5:13425, GTF2I:13632	0.212306	0.233591	0.3222	0.427927
REACTOME_TNFR1_INDUCED_PROAPOPTOTIC_SIGNALING	0.100117	11	OTUD7B:167, RIPK1:369, USP4:1136, TNF:1713, USP2:3447, TNFAIP3:5855, FADD:8086, TRADD:8225, TRAF2:10190, USP21:10862, CYLD:12506	0.250383	0.254884	0.32287	0.427927
REACTOME_NUCLEOTIDE_EXCISION_REPAIR	0.0412163	72	RFC5:606, INO80B:776, AQR:827, EP300:887, ISY1:1147, POLR2F:1548, ERCC8:1575, CDK7:1703, CHD1L:2147, ERCC3:2188, XPA:2229, GTF2H4:2265, ZNF830:2388, POLE:2473, TCEA1:2514, PIAS3:2536, POLD2:2855, GPS1:2921, LIG3:2986, CUL4B:3215, ERCC4:3584, RFC3:3707, COPS7B:3859, XAB2:3957, COPS4:4021, POLE4:4120, PPIE:4165, PARP2:4196, POLE2:4316, PIAS1:4464, USP45:4711, INO80D:4861, GTF2H1:5409, DDB2:5665, EL…	0.227766	0.241303	0.32329	0.427927
REACTOME_FORMATION_OF_THE_EARLY_ELONGATION_COMPLEX	0.0779074	18	GTF2F1:173, NELFE:644, POLR2F:1548, CDK7:1703, ERCC3:2188, GTF2H4:2265, SUPT5H:3595, NCBP1:3785, NELFB:3978, NELFCD:4291, GTF2H1:5409, CTDP1:6581, MNAT1:10031, GTF2H3:10860, NELFA:11217, CCNH:12931, GTF2H2:13357, ERCC2:13518	0.252756	0.254884	0.32387	0.427927
REACTOME_GENE_SILENCING_BY_RNA	0.0672143	57	NUP153:494, PIWIL1:591, NUP54:598, NUP155:669, IPO8:789, NUP58:1124, DICER1:1139, TARBP2:1337, POLR2F:1548, PIWIL4:1728, PIWIL2:1918, SEC13:2080, NUP160:2244, NUP88:2429, NUP210:3152, TNRC6C:3368, RAE1:3535, NUP37:3561, NUP50:3627, PRKRA:3658, AGO1:3769, NUP214:3850, NUP188:3885, TPR:4025, TDRD6:4307, NUP107:4564, MOV10L1:4702, TNRC6B:4725, DROSHA:5338, ASZ1:6190, NUP205:6327, HENMT1:7214, NUP35:…	0.0798272	0.146982	0.32411	0.427927
REACTOME_TRANSPORT_OF_MATURE_MRNAS_DERIVED_FROM_INTRONLESS_TRANSCRIPTS	0.0742255	37	NUP153:494, NUP54:598, NUP155:669, WDR33:917, NUP58:1124, SEC13:2080, NUP160:2244, NUP88:2429, NUP210:3152, RAE1:3535, NUP37:3561, NUP50:3627, NCBP1:3785, NUP214:3850, NUP188:3885, SLBP:3992, TPR:4025, NUP107:4564, FIP1L1:4644, SYMPK:4649, CPSF1:6270, NUP205:6327, NUP35:7250, EIF4E:7427, NUP93:7660, CPSF2:8395, NUP43:9054, NUP98:10115, NUP85:10134, SEH1L:10184, AAAS:10347, NUP133:10805, CPSF3:115…	0.11866	0.17638	0.32436	0.427927
REACTOME_SIGNALING_BY_NOTCH	0.0369879	124	SNW1:246, JUN:289, CCND1:313, FABP7:394, NOTCH2:493, NEURL1:528, KAT2A:626, HDAC5:659, NOTCH4:716, PSMF1:738, MAML2:870, EP300:887, NBEA:894, STAT1:977, PSMD1:1008, HEY2:1133, TBL1X:1148, PSMD13:1267, AKT1:1545, NOTCH3:1655, HDAC7:1718, PSMD4:2289, JAG1:2353, HEYL:2376, ATP2A3:2471, DLL4:2472, MAML3:2481, ARRB2:2566, ADAM17:2597, PSMD9:2633, FURIN:2846, WWC1:2870, EGF:3209, MOV10:3363, TNRC6C:336…	0.156793	0.197404	0.32449	0.427927
REACTOME_INFLUENZA_INFECTION	0.0471484	55	GTF2F1:173, RPL9:227, RPL36A:266, NUP153:494, NUP54:598, NUP155:669, KPNA2:740, NUP58:1124, EIF2AK2:1473, POLR2F:1548, CALR:1822, SEC13:2080, NUP160:2244, NUP88:2429, NUP210:3152, RPS27L:3356, RAE1:3535, NUP37:3561, NUP50:3627, NUP214:3850, NUP188:3885, KPNA5:4017, TPR:4025, TGFB1:4293, RPL14:4329, NUP107:4564, KPNA7:4787, NUP205:6327, PARP1:6650, NUP35:7250, RPS3:7419, IPO5:7596, NUP93:7660, CAN…	0.227376	0.241303	0.32466	0.427927
KEGG_LINOLEIC_ACID_METABOLISM	-0.0811561	13	PLA2G1B:207, PLA2G12A:253, PLA2G2D:1623, PLA2G4A:2565, PLA2G4E:3480, PLA2G2E:3918, PLA2G3:5401, CYP2E1:6895, PLA2G5:7329, PLA2G2F:9021, PLA2G12B:9217, PLA2G6:11928, PLA2G2C:11999	0.311166	0.279669	0.32925	0.432157
REACTOME_RNA_POLYMERASE_III_TRANSCRIPTION_INITIATION_FROM_TYPE_3_PROMOTER	0.0736937	18	POU2F1:864, BRF2:1004, POLR2F:1548, POLR3D:2006, POLR3A:2923, POLR3GL:3702, TBP:4653, SNAPC5:4980, POLR1D:5138, POLR3B:5268, SNAPC1:7593, CRCP:7734, POLR3E:8057, POLR1C:8165, ZNF143:9389, POLR3C:10917, POLR3G:12269, POLR3H:13243	0.279331	0.268036	0.3306	0.432157
REACTOME_CILIUM_ASSEMBLY	0.0489577	154	AHI1:98, RHO:129, EXOC5:213, TMEM216:316, IFT74:378, IFT172:390, KIF3C:486, SEPTIN2:538, CEP164:567, CEP250:780, MKS1:787, KIF3B:886, DYNC2LI1:1043, OFD1:1081, PRKACA:1458, TCTN2:1685, GBF1:1825, CEP57:1861, NEK2:1921, IFT46:1957, LZTFL1:2042, TUBB1:2046, CCT8:2128, NPHP3:2136, DCTN3:2160, SCLT1:2247, B9D2:2249, EXOC1:2284, WDR35:2424, TTC26:2507, CEP131:2572, CEP41:2587, HAUS4:2652, CEP43:2717, …	0.0370931	0.0938244	0.33089	0.432157
REACTOME_AUF1_HNRNP_D0_BINDS_AND_DESTABILIZES_MRNA	0.0532197	30	HSPB1:559, PSMF1:738, HNRNPD:897, PSMD1:1008, PSMD13:1267, PSMD4:2289, PSMD9:2633, PSMA8:3829, PSMB4:3880, PSMD2:3993, PSMD3:4343, PSMB11:4403, PSMB9:4409, PSMB10:5084, PSMB2:5295, PSMD8:5898, PSMD12:7927, PSME2:8228, PSMD6:8496, PSMB7:8709, EIF4G1:8944, PSMB8:9272, PSMB6:9847, PSMB5:9913, PSME4:10453, PSME1:10594, PSMD5:10989, PSME3:11196, PSMB1:12465, PSMD10:13278	0.313515	0.280303	0.331	0.432157
REACTOME_EXTRACELLULAR_MATRIX_ORGANIZATION	0.0349515	267	CTSK:74, TIMP2:80, NTN4:99, TIMP1:261, COL11A2:264, PDGFA:299, MMP2:303, DDR1:372, MMP17:497, ITGA8:616, NCAM1:619, ITGB7:631, ADAMTS4:711, ITGA3:792, LAMA4:890, COL10A1:942, ITGA11:946, ADAMTS9:1026, ITGA10:1079, MMP12:1123, SPARC:1185, LAMB2:1195, ITGB6:1236, PCOLCE2:1257, COL6A5:1258, MMP14:1266, DAG1:1297, SERPINH1:1330, MUSK:1401, TTR:1407, COL5A2:1439, ITGB4:1555, ADAMTS5:1755, JAM3:1780, I…	0.051658	0.110387	0.33138	0.432157
REACTOME_INTERLEUKIN_1_FAMILY_SIGNALING	0.0314441	97	PTPN14:85, AGER:206, PTPN6:228, TRAF6:240, IL18:459, PTPN9:563, PSMF1:738, CHUK:925, PSMD1:1008, PSMD13:1267, SQSTM1:1286, IL1RAPL1:1534, IL36RN:1554, IL18R1:1721, TAB3:1772, S100A12:1922, PTPN13:1927, PTPN4:2250, PSMD4:2289, PSMD9:2633, NFKBIB:2660, IRAK4:2798, MAP3K3:3068, GSDMD:3230, PSMA8:3829, PSMB4:3880, TAB1:3932, PSMD2:3993, NOD2:4173, PTPN5:4266, PSMD3:4343, NFKBIA:4373, PSMB11:4403, PSM…	0.286244	0.269209	0.332	0.432157
REACTOME_TRAF6_MEDIATED_NF_KB_ACTIVATION	0.0615617	17	AGER:206, TRAF6:240, CHUK:925, S100A12:1922, NFKBIB:2660, NFKBIA:4373, NFKB1:5375, IKBKB:6478, APP:6689, NKIRAS1:7105, MAP3K1:7181, IFIH1:8634, NFKB2:9725, TRAF2:10190, DDX58:10942, RELA:11111, TRIM25:12395	0.379772	0.309945	0.33221	0.432157
REACTOME_ERBB2_ACTIVATES_PTK6_SIGNALING	0.0877625	11	ERBB3:2824, EGF:3209, NRG1:3359, ERBB4:4029, BTC:5061, EGFR:5182, ERBB2:5718, EREG:6088, NRG2:7642, NRG3:7863, HBEGF:13854	0.313656	0.280303	0.33255	0.432157
REACTOME_NRAGE_SIGNALS_DEATH_THROUGH_JNK	0.0447779	52	SOS1:68, TIAM2:190, ARHGEF12:209, FGD1:630, AATF:1276, ARHGEF2:1373, ARHGEF40:1613, RASGRF2:1752, NGF:1980, KALRN:2608, PLEKHG5:2940, ARHGEF38:3180, ARHGEF10L:3503, ARHGEF3:3994, ARHGEF11:4013, ARHGEF37:4079, GNA13:4170, FGD2:4417, VAV1:4613, TIAM1:4647, AKAP13:5001, SOS2:5992, ITSN1:6634, ARHGEF1:6790, FGD4:6844, ARHGEF10:6889, ARHGEF9:6906, ARHGEF18:7162, NGEF:7337, PLEKHG2:7362, NGFR:7700, ARH…	0.264871	0.260006	0.33465	0.432157
KEGG_INSULIN_SIGNALING_PATHWAY	-0.0300331	108	ACACA:137, HK1:175, PHKA2:283, SH2B2:386, GYS2:390, PCK1:401, GSK3B:431, PYGL:452, ACACB:487, PCK2:569, SHC4:760, INPP5K:926, CBLB:971, HK2:1065, INS:1157, PHKB:1531, PRKAB2:1750, PYGM:1756, SLC2A4:1887, PRKAB1:2010, INPP5D:2052, MKNK1:2346, PKLR:2507, BAD:2839, FASN:3048, AKT2:3083, SOCS3:3125, TRIP10:3251, PIK3R3:3305, PRKAG1:3310, PRKCI:3358, PYGB:3367, PRKAR1B:3525, PDE3B:3532, PIK3R2:3656, P…	0.282812	0.268036	0.33491	0.432157
REACTOME_INSERTION_OF_TAIL_ANCHORED_PROTEINS_INTO_THE_ENDOPLASMIC_RETICULUM_MEMBRANE	-0.0901993	16	UBE2J2:793, ALDH3A2:1123, CYB5A:1763, HMOX1:1873, VAPA:2438, PRNP:2529, GET1:3773, BAG6:4004, CAMLG:4759, EMD:5992, APP:7224, STX5:8098, OTOF:8163, GET4:11296, UBL4A:11655, SGTA:13302	0.21183	0.233476	0.33532	0.432157
REACTOME_SHC1_EVENTS_IN_EGFR_SIGNALING	0.0837644	10	SOS1:68, EGF:3209, SHC1:3918, TGFA:4214, BTC:5061, EGFR:5182, EREG:6088, AREG:7318, EPGN:10434, HBEGF:13854	0.359153	0.300848	0.33549	0.432157
KEGG_B_CELL_RECEPTOR_SIGNALING_PATHWAY	0.0423105	57	SOS1:68, PTPN6:228, JUN:289, BCL10:309, CHUK:925, BTK:1380, PPP3R2:1446, AKT1:1545, NFATC2:1809, CARD11:1830, PPP3R1:2002, PIK3AP1:2154, MALT1:2546, RASGRP3:2604, NFKBIB:2660, PPP3CC:2883, MAPK3:3331, PIK3CG:3585, PIK3R5:4215, NFKBIA:4373, VAV1:4613, LYN:4625, CR2:4781, NFKB1:5375, NFKBIE:5710, NFATC3:5795, BLNK:5797, SOS2:5992, IKBKB:6478, PRKCB:6560, PIK3CB:6664, NFATC1:7116, CD79B:7421, PIK3CD…	0.270173	0.262341	0.33597	0.432157
REACTOME_RAC1_GTPASE_CYCLE	0.0259918	160	ARHGAP42:4, SOS1:68, TIAM2:190, SRGAP1:276, FERMT2:314, IQGAP1:330, SWAP70:426, PLEKHG1:685, DLC1:844, AMIGO2:900, MCAM:972, DOCK7:1016, DOCK1:1213, FAM13A:1331, PLEKHG6:1362, EPHA2:1432, CIT:1504, ARHGDIB:1526, VRK2:1541, WASF1:1633, RASGRF2:1752, ARHGAP21:1837, VANGL1:1989, ARHGAP32:2004, PAK2:2085, NCF2:2192, JAG1:2353, ARHGAP22:2541, KALRN:2608, DEF6:2704, LEMD3:2794, OPHN1:2990, CDC42EP4:309…	0.259434	0.258703	0.33605	0.432157
REACTOME_POLO_LIKE_KINASE_MEDIATED_EVENTS	0.0866319	13	EP300:887, CDC25A:1217, LIN54:2910, MYBL2:3696, PKMYT1:4279, CCNB2:4753, PLK1:5420, CCNB1:5490, WEE1:7361, FOXM1:7783, LIN9:9476, CDC25C:10240, LIN37:13199	0.279647	0.268036	0.33608	0.432157
KEGG_GLYCOLYSIS_GLUCONEOGENESIS	-0.0617997	49	ALDH1B1:26, PGM2:124, HK1:175, PCK1:401, PFKM:475, PCK2:569, HK2:1065, ALDH3A2:1123, ALDOB:1149, PKM:1573, ALDH2:1587, DLD:1875, ADH5:2298, PKLR:2507, PFKP:2883, LDHA:3461, ALDH3B1:3852, BPGM:3965, ALDH7A1:4272, G6PC2:4716, FBP1:4736, TPI1:4777, ENO3:5020, ENO2:5067, ALDH3A1:5826, PDHA2:5890, PGK2:6003, ACSS2:6062, GPI:6227, ALDH1A3:6641, ALDH9A1:6755, PFKL:6886, HK3:6894, DLAT:7356, ACSS1:8430, …	0.135172	0.183559	0.33786	0.433394
KEGG_LEUKOCYTE_TRANSENDOTHELIAL_MIGRATION	-0.0437128	90	CLDN16:3, CLDN15:279, MMP9:428, PTPN11:451, CLDN18:576, CLDN19:578, CLDN23:888, CLDN9:889, ITGAL:896, ICAM1:1139, VCAM1:1333, VAV3:1369, CLDN2:1418, CXCL12:1420, SIPA1:1586, ARHGAP5:1694, MYL2:1741, CLDN4:1754, CLDN3:1783, ITGB1:1984, MAPK12:2126, VAV2:2294, ITGA4:2439, OCLN:2611, CLDN6:2945, ITGAM:3040, CLDN11:3070, CLDN17:3263, PIK3R3:3305, ACTN4:3364, EZR:3428, PIK3R2:3656, RASSF5:4132, CYBA:4…	0.153119	0.196721	0.33814	0.433394
REACTOME_INTERACTIONS_OF_VPR_WITH_HOST_CELLULAR_PROTEINS	0.0837223	29	NUP153:494, NUP54:598, NUP155:669, PSIP1:676, NUP58:1124, SEC13:2080, NUP160:2244, NUP88:2429, NUP210:3152, RAE1:3535, NUP37:3561, NUP50:3627, NUP214:3850, NUP188:3885, TPR:4025, NUP107:4564, NUP205:6327, NUP35:7250, NUP93:7660, NUP43:9054, NUP98:10115, NUP85:10134, SEH1L:10184, AAAS:10347, NUP133:10805, SLC25A4:12107, NUP62:12156, NUP42:12387, NDC1:12918	0.119002	0.17638	0.33903	0.433831
REACTOME_UNBLOCKING_OF_NMDA_RECEPTORS_GLUTAMATE_BINDING_AND_ACTIVATION	0.0894364	17	LRRC7:247, DLG4:409, DLG3:688, GRIA1:1381, CAMK2B:2103, GRIA3:3365, ACTN2:3581, CAMK2A:4284, GRIN2B:5186, DLG1:5494, DLG2:7100, GRIN2C:7465, GRIN1:9078, GRIN2A:11350, GRIA2:11534, NEFL:12560, GRIN2D:13553	0.201951	0.229501	0.34183	0.436307
REACTOME_CELL_SURFACE_INTERACTIONS_AT_THE_VASCULAR_WALL	-0.0415558	92	MIF:83, SLC7A6:91, SLC7A9:114, YES1:200, CD44:426, PTPN11:451, SLC7A11:510, MERTK:515, APOB:812, ITGAL:896, GLG1:1177, ITGAX:1723, SLC7A5:1725, SLC7A10:1731, SLC7A8:1835, ITGB1:1984, SLC7A7:2004, INPP5D:2052, ITGA4:2439, VPREB3:2627, GPC1:2754, MAG:2771, ITGAM:3040, ATP1B3:3391, PPIL2:3617, SELL:3637, PIK3R2:3656, PROS1:3726, TREM1:3860, CAV1:3991, SDC3:4077, ATP1B1:4483, CD47:4585, PECAM1:4684, …	0.169769	0.205901	0.34207	0.436307
REACTOME_MHC_CLASS_II_ANTIGEN_PRESENTATION	0.0306253	81	CTSK:74, CTSH:363, KIF3C:486, AP2M1:647, KLC3:713, KIF3B:886, CAPZA1:918, KIF15:1098, SEC31A:1766, CTSC:1829, TUBB1:2046, CTSE:2071, SEC13:2080, DCTN3:2160, KLC4:2961, AP1M2:3090, DCTN6:3094, SEC24A:3272, AP1G1:3555, CTSO:3811, CAPZB:3899, KIF18A:3909, KIF3A:3974, RACGAP1:4078, KIF2B:4143, CTSS:4156, DNM3:4357, CTSB:4506, ACTR1B:4974, DCTN4:5320, CTSD:5632, DNM1:5719, OSBPL1A:5726, SPTBN2:5807, S…	0.342091	0.293552	0.34271	0.436418
REACTOME_RAF_INDEPENDENT_MAPK1_3_ACTIVATION	0.0677984	18	PEA15:37, DUSP16:470, DUSP7:993, IL6R:3160, MAPK3:3331, IL6:3479, DUSP4:3802, DUSP1:4257, IL6ST:4617, DUSP5:6600, JAK1:7505, JAK2:7897, DUSP10:7969, MAP2K2:8447, DUSP8:10935, TYK2:11642, DUSP2:12220, PTPN11:13462	0.3196	0.283324	0.34457	0.437277
REACTOME_INTRA_GOLGI_TRAFFIC	0.0495763	36	COG6:143, BET1L:239, NSF:311, VPS45:375, NAPG:1145, GOLIM4:1598, RIC1:1787, RGP1:2298, VTI1A:2389, GOSR2:2864, YKT6:3124, COG8:3676, MAN2A2:3823, COG3:4371, TRIP11:4852, STX5:5815, RAB33B:6152, STX6:6215, NAPA:7112, STX16:7118, MAN1A2:7894, COG4:8261, COG2:8529, MAN1C1:8876, COG1:9023, CYTH1:9683, GOLGA5:9935, GOSR1:10261, CUX1:10624, COG5:10690, MAN1A1:10751, CYTH4:11276, CYTH3:11636, SNAP29:123…	0.303898	0.276777	0.34469	0.437277
REACTOME_SIGNALING_BY_NOTCH1_PEST_DOMAIN_MUTANTS_IN_CANCER	0.0484247	40	SNW1:246, NEURL1:528, KAT2A:626, HDAC5:659, MAML2:870, EP300:887, HEY2:1133, TBL1X:1148, HDAC7:1718, JAG1:2353, HEYL:2376, DLL4:2472, MAML3:2481, ADAM17:2597, RBPJ:3830, DLL1:5460, MYC:5500, HES5:6285, HDAC9:6645, HDAC11:6914, PSEN1:7723, APH1B:7770, NOTCH1:8247, NCOR2:8295, KAT2B:8758, HEY1:8867, NCSTN:9016, JAG2:9373, HDAC10:9978, MIB2:9986, CREBBP:9993, MAML1:10196, NEURL1B:10491, HDAC4:10676,…	0.289922	0.270701	0.34551	0.437277
REACTOME_G_ALPHA_Z_SIGNALLING_EVENTS	-0.0609423	26	RGSL1:314, PRKCD:329, ADRA2A:984, PRKCQ:1064, ADCY7:2759, GNB5:3331, ADCY4:3346, ADCY6:3574, ADRA2B:3613, ADCY8:3788, RGS19:3960, ADCY3:4274, ADCY9:4292, PRKCH:4685, ADCY1:7171, PRKCB:7353, PRKCE:8261, RGS17:8550, PRKCG:8828, ADCY2:9228, RGS20:9279, GNB3:10275, PRKCA:10537, ADCY5:10783, RGS16:11882, GNAT3:12356	0.282513	0.268036	0.3456	0.437277
REACTOME_KERATAN_SULFATE_BIOSYNTHESIS	0.0689732	25	CHST2:415, CHST6:766, ST3GAL2:811, B4GALT3:1765, B4GALT6:1817, CHST1:2100, PRELP:2101, ST3GAL1:3717, B3GNT4:4558, B4GAT1:5041, SLC35D2:5436, ST3GAL3:5558, B4GALT5:5728, LUM:5872, B4GALT2:6724, OGN:7197, KERA:7331, ST3GAL4:8688, B3GNT7:9070, B4GALT4:9952, FMOD:10036, OMD:10791, B3GNT2:11758, ST3GAL6:12979, B4GALT1:13400	0.232961	0.244471	0.34641	0.4376
REACTOME_P75_NTR_RECEPTOR_MEDIATED_SIGNALLING	0.0327951	77	SOS1:68, TIAM2:190, ARHGEF12:209, TRAF6:240, FGD1:630, AATF:1276, SQSTM1:1286, ARHGEF2:1373, PRDM4:1459, ARHGEF40:1613, RASGRF2:1752, NGF:1980, RTN4R:2433, ADAM17:2597, KALRN:2608, PLEKHG5:2940, ARHGEF38:3180, ARHGEF10L:3503, ARHGEF3:3994, ARHGEF11:4013, ARHGEF37:4079, GNA13:4170, LINGO1:4294, NFKBIA:4373, FGD2:4417, VAV1:4613, TIAM1:4647, AKAP13:5001, NFKB1:5375, ITGB3BP:5430, SOS2:5992, OMG:602…	0.321121	0.283745	0.34779	0.438642
REACTOME_MTORC1_MEDIATED_SIGNALLING	0.0657694	11	RPTOR:865, RRAGD:1605, AKT1S1:2400, SLC38A9:3996, EIF4EBP1:4438, MTOR:5297, EIF4E:7427, EIF4G1:8944, LAMTOR2:10396, EEF2K:11244, EIF4B:11463	0.450199	0.332357	0.34927	0.439206
REACTOME_N_GLYCAN_TRIMMING_IN_THE_ER_AND_CALNEXIN_CALRETICULIN_CYCLE	0.0531489	27	DERL1:1199, SYVN1:1357, UBXN1:1476, RNF139:1561, TRIM13:1592, CALR:1822, RNF5:2107, PRKCSH:2799, EDEM2:3546, MLEC:3855, UGGT1:4502, OS9:4704, AMFR:5849, ENGASE:5921, MOGS:6080, PDIA3:6490, CANX:8248, SEL1L:8474, RAD23B:8534, MARCHF6:8917, MAN1B1:9558, GANAB:11167, EDEM3:11237, RNF103:12161, UGGT2:12444, NGLY1:12624, EDEM1:13655	0.33955	0.293023	0.34935	0.439206
REACTOME_GRB2_SOS_PROVIDES_LINKAGE_TO_MAPK_SIGNALING_FOR_INTEGRINS	0.076272	10	SOS1:68, TLN1:604, ITGB3:1814, FN1:4253, FGB:4905, PTK2:6060, SRC:6424, VWF:9908, FGG:12853, ITGA2B:13358	0.40374	0.315877	0.35162	0.441357
REACTOME_CHROMATIN_MODIFYING_ENZYMES	0.0449876	160	SAP130:10, PRMT6:14, KMT2A:16, ARID2:171, TADA1:238, ING3:297, CCND1:313, KAT2A:626, EZH2:657, JMJD6:667, SMYD3:731, EP300:887, HMG20B:1036, TAF10:1062, SMYD2:1101, JADE1:1104, TBL1X:1148, KDM1B:1487, KDM4C:1498, SETD6:1510, SUPT20H:1631, BRPF3:1840, GPS2:1917, RIOX2:2217, EHMT2:2237, ELP4:2248, BRPF1:2267, KAT6B:2344, PRDM16:2383, KMT2E:2513, MSL1:2559, ARID4A:2601, SMARCA4:2621, BRWD1:2663, KDM…	0.0509477	0.109241	0.35318	0.4414
REACTOME_ECM_PROTEOGLYCANS	0.0477453	72	ITGA8:616, NCAM1:619, LAMA4:890, SPARC:1185, LAMB2:1195, ITGB6:1236, COL6A5:1258, DAG1:1297, MUSK:1401, COL5A2:1439, ITGB3:1814, LAMA2:1986, COL6A2:2106, LAMA5:2129, ITGA9:2551, DCN:2602, VCAN:3087, COL4A6:3103, ASPN:3108, COL4A1:3129, COL9A2:3205, COL1A1:3242, TNC:3337, TGFB2:3498, LRP4:4245, FN1:4253, TGFB1:4293, COL4A2:4556, HSPG2:4853, BCAN:5525, COL2A1:5555, LUM:5872, COL5A3:6045, BGN:6154, …	0.162355	0.201297	0.3532	0.4414
REACTOME_REGULATION_OF_HSF1_MEDIATED_HEAT_SHOCK_RESPONSE	0.0469273	66	CRYBA4:176, HSPB2:292, HSPH1:424, NUP153:494, HSPB1:559, NUP54:598, NUP155:669, HSPA14:885, NUP58:1124, SERPINH1:1330, BAG3:1421, BAG1:1687, SEC13:2080, NUP160:2244, NUP88:2429, COL4A6:3103, NUP210:3152, ATR:3157, MAPKAPK2:3274, MAPK3:3331, RAE1:3535, NUP37:3561, NUP50:3627, NUP214:3850, NUP188:3885, TPR:4025, TNFRSF21:4056, DNAJC7:4345, BAG2:4426, NUP107:4564, HSPA4L:5325, RPS19BP1:6061, NUP205:…	0.188418	0.220755	0.35368	0.4414
REACTOME_NEPHRIN_FAMILY_INTERACTIONS	0.0670699	20	IQGAP1:330, ACTN3:452, SPTBN1:492, KIRREL3:605, NCK2:788, KIRREL1:941, ACTN2:3581, NPHS2:4712, PIK3CB:6664, NPHS1:6747, MAGI2:7299, ACTN1:7977, NCK1:7981, PIK3R1:8583, SPTAN1:9804, PIK3R2:10257, ACTN4:10549, KIRREL2:11146, WASL:11344, CD2AP:12893	0.299401	0.275162	0.35389	0.4414
REACTOME_RHO_GTPASES_ACTIVATE_NADPH_OXIDASES	0.0738114	13	NCF2:2192, MAPK3:3331, PRKCA:3376, NCF1:4521, PIK3R4:5045, PIK3C3:5391, CYBB:5439, S100A8:5723, PRKCB:6560, MAPK11:7054, NOX3:7270, CYBA:9779, PRKCD:13584	0.356987	0.300235	0.35517	0.442297
REACTOME_PROTEIN_UBIQUITINATION	0.0448072	34	BCL10:309, RNF181:816, DERL1:1199, UBE2Q2:1314, PEX12:1992, PAF1:2253, SELENOS:2440, RNF40:2592, PEX14:2813, UBA6:2952, WAC:3009, UBE2S:3026, LEO1:4085, RNF20:4886, OTULIN:5437, PEX10:5609, SHPRH:6360, UBE2N:6430, PEX5:7579, PEX13:7755, USP7:8271, PEX2:8523, UBE2L3:8694, CTR9:9172, UBE2T:9329, TMEM129:9582, RAD18:10640, RTF1:10774, HLTF:10906, RNF152:11155, USP5:12168, PRKDC:12509, RNF144A:12545,…	0.366453	0.30574	0.35719	0.44265
REACTOME_DEFECTIVE_EXT2_CAUSES_EXOSTOSES_2	-0.0806012	14	GPC6:159, GPC3:508, GPC4:1017, AGRN:1226, GPC5:2494, GPC1:2754, SDC3:4077, GPC2:6296, SDC1:7426, HSPG2:9060, SDC4:10095, SDC2:10440, EXT1:11878, EXT2:12243	0.296596	0.274022	0.35767	0.44265
REACTOME_PHASE_0_RAPID_DEPOLARISATION	0.0779298	23	RANGRF:485, CACNG4:535, SCN3B:1699, CAMK2B:2103, SCN2B:2280, SCN5A:2908, CACNA1C:4041, CAMK2A:4284, SCN10A:5128, SCN9A:5173, SCN7A:5548, CACNB2:6218, SCN2A:6449, CACNB1:7140, CACNG6:7288, SCN1A:8311, SCN4B:8351, FGF11:8638, SCN3A:9344, SCN8A:9568, CACNA2D2:10415, SCN1B:11124, SCN11A:11698	0.196086	0.2248	0.35958	0.44265
REACTOME_CELLULAR_RESPONSE_TO_HYPOXIA	0.0364797	45	CITED2:419, PSMF1:738, EP300:887, PSMD1:1008, PSMD13:1267, EGLN2:1650, LIMD1:1956, HIF1AN:2064, PSMD4:2289, PSMD9:2633, PSMA8:3829, PSMB4:3880, PSMD2:3993, PSMD3:4343, PSMB11:4403, PSMB9:4409, EPAS1:4670, PSMB10:5084, ARNT:5267, PSMB2:5295, CA9:5361, HIF1A:5650, PSMD8:5898, AJUBA:7235, EPO:7917, PSMD12:7927, PSME2:8228, PSMD6:8496, HIGD1A:8673, PSMB7:8709, PSMB8:9272, PSMB6:9847, PSMB5:9913, VEGF…	0.397919	0.315645	0.35976	0.44265
REACTOME_ESR_MEDIATED_SIGNALING	0.0371478	99	GTF2F1:173, JUN:289, MMP2:303, CCND1:313, FKBP5:529, HSPB1:559, CXXC5:592, KPNA2:740, FOSB:768, GTF2A1:798, POU2F1:864, MED1:868, EP300:887, USF2:1523, AKT1:1545, POLR2F:1548, GNAT3:1557, KANK1:1579, FOXO3:1729, MMP3:1874, PPID:1912, NRIP1:2386, STRN:2533, KDM1A:2751, CCNT1:2790, EGF:3209, ZDHHC21:3322, MAPK3:3331, MOV10:3363, EBAG9:3366, TNRC6C:3368, GNB3:3638, AGO1:3769, SHC1:3918, ERBB4:4029, …	0.20316	0.229779	0.35983	0.44265
REACTOME_BIOSYNTHESIS_OF_THE_N_GLYCAN_PRECURSOR_DOLICHOL_LIPID_LINKED_OLIGOSACCHARIDE_LLO_AND_TRANSFER_TO_A_NASCENT_PROTEIN	-0.0328079	72	FCSK:150, ST6GAL1:216, GFPT1:392, DPM2:537, DPM1:596, ST3GAL6:934, DOLPP1:1084, CMAS:1339, GMDS:1402, GLB1:1560, GMPPB:1574, NANS:1738, NEU4:1761, ST6GALNAC6:1964, SRD5A3:2018, ALG10:2204, ALG10B:2207, SLC35C1:2344, ALG6:2689, CTSA:3221, NEU1:3295, MVD:3421, SLC17A5:3589, ST6GALNAC4:3846, ALG1:3899, ST3GAL5:3994, ST6GAL2:4044, SLC35A1:4463, GNPNAT1:4529, NEU3:4574, FPGT:4939, ST3GAL4:5225, NPL:56…	0.337018	0.292042	0.36139	0.44265
REACTOME_SUMOYLATION_OF_DNA_REPLICATION_PROTEINS	0.0611137	37	TOP2A:111, NUP153:494, NUP54:598, NUP155:669, NUP58:1124, SEC13:2080, NUP160:2244, NUP88:2429, PIAS3:2536, NUP210:3152, RAE1:3535, NUP37:3561, NUP50:3627, NUP214:3850, NUP188:3885, TPR:4025, NUP107:4564, BIRC5:4923, RANGAP1:6070, NUP205:6327, CDCA8:6587, NUP35:7250, NUP93:7660, AURKB:8140, PIAS4:8798, NUP43:9054, AURKA:9263, NUP98:10115, NUP85:10134, SEH1L:10184, AAAS:10347, NUP133:10805, NUP62:1…	0.198871	0.22675	0.36265	0.44265
REACTOME_ADAPTIVE_IMMUNE_SYSTEM	0.0167463	515	HECW2:5, MAP3K14:31, WSB1:38, MYLIP:55, SOS1:68, CTSK:74, SH3RF1:139, RNF144B:165, PTPN6:228, TRAF6:240, LTN1:243, BCL10:309, CTSH:363, ITK:469, KIF3C:486, FBXW5:573, ITGB7:631, AP2M1:647, LNPEP:687, KLC3:713, MRC2:714, PSMF1:738, UBA5:755, KBTBD7:846, KIF3B:886, CAPZA1:918, CHUK:925, BTBD6:989, PSMD1:1008, RNF130:1042, ZAP70:1045, BLK:1096, KIF15:1098, PJA1:1156, UBE4A:1162, ARIH2:1180, FBXL12:1…	0.202445	0.229575	0.36276	0.44265
REACTOME_SYNTHESIS_OF_PIPS_AT_THE_LATE_ENDOSOME_MEMBRANE	0.0939122	11	MTMR9:1363, MTMR2:1890, FIG4:2243, VAC14:4571, PIK3R4:5045, MTMR7:5204, PIK3C3:5391, PIKFYVE:7248, PIK3C2A:7592, MTM1:11001, MTMR4:12319	0.280952	0.268036	0.36299	0.44265
REACTOME_FCGR_ACTIVATION	-0.0965513	10	YES1:200, HCK:908, SYK:1733, FCGR1A:3755, FCGR3A:6117, FGR:6810, SRC:7489, CD247:8941, CD3G:9233, LYN:9288	0.290529	0.270807	0.3632	0.44265
REACTOME_CELL_CELL_JUNCTION_ORGANIZATION	-0.0466044	57	CLDN16:3, CDH17:273, CLDN15:279, CLDN18:576, CLDN19:578, PARD6B:698, CLDN23:888, CLDN9:889, PARD3:1185, CRB3:1186, CDH12:1327, CLDN2:1418, CLDN4:1754, CLDN3:1783, CLDN12:2017, NECTIN3:2616, CDH11:2646, CDH2:2697, CLDN6:2945, CLDN11:3070, CLDN17:3263, PRKCI:3358, CDH7:4358, NECTIN2:4701, CDH3:5428, F11R:5541, CADM2:5788, CDH4:5989, CLDN5:6015, SDK1:6339, CDH13:6377, CLDN14:6647, PATJ:6682, AFDN:67…	0.224531	0.239491	0.36461	0.44265
REACTOME_THE_ROLE_OF_NEF_IN_HIV_1_REPLICATION_AND_DISEASE_PATHOGENESIS	0.068845	20	AP2M1:647, CD28:1251, ATP6V1H:1263, PAK2:2085, LCK:2414, AP1M2:3090, AP1G1:3555, PACS1:4648, CD247:4972, CD4:5080, AP1S2:6325, AP2A2:6374, CD8B:6870, AP1B1:7022, DOCK2:8002, AP1S3:10585, ELMO1:10784, B2M:11836, HCK:13005, AP2A1:13114	0.286793	0.269322	0.3658	0.44265
[truncated: 644 more rows]

## Sheet: Table_S6
Table S6. Phenotype enrichment analysis results from RERconverge. Multiple hypothesis testing corrections were performed by generating Q-values using Storey’s correction method. Permulation P-values were generated from 100,000 null statistics. A negative enrichment statistic (Stat) signifies the following pattern: the greater the decrease in carnivory, the higher the rate of evolution of the gene…
[truncated: 3,561 more rows]

[truncated: 5 more sheets: Table_S7, Table_S8, Table_S9, Table_S10, Table_S11]
